# Supplementary material
Source: PubMed Central journal article supplement (PMC5512287)
Supplement: NIHMS870370-supplement-SI.pdf [file NIHMS870370-supplement-SI.pdf]

# Ligand Promoted *meta*-C–H Chlorination of Anilines and Phenols

Hang Shi, Peng Wang, Shin Suzuki, Marcus E. Farmers and Jin-Quan Yu

Department of Chemistry, The Scripps Research Institute, 10550 N. Torrey Pines Road. La Jolla, CA 92037,  
USA.

## TABLE OF CONTENTS

|                                                                         |    |
|-------------------------------------------------------------------------|----|
| 1. General Information .....                                            | 2  |
| 2. Substrate Structures .....                                           | 3  |
| 3. Experimental Section .....                                           | 4  |
| 3.1 Preparation of Substrates .....                                     | 4  |
| 3.2 Preparation of Ligands .....                                        | 7  |
| 3.3 Ligand Screening .....                                              | 9  |
| 3.4 Norbornene Derivatives Screening .....                              | 10 |
| 3.5 Loading Screening .....                                             | 11 |
| 3.6 <i>meta</i> -C–H Chlorination of Anilines .....                     | 11 |
| 3.7 <i>meta</i> -C–H Dichlorination of Aniline <b>1ab</b> .....         | 19 |
| 3.8 <i>meta</i> -C–H Chlorination of Phenol <b>3</b> .....              | 19 |
| 3.9 Gram-Scale <i>meta</i> -C–H Chlorination of Aniline <b>1a</b> ..... | 20 |
| 3.10 Diversification of <i>meta</i> -Chloro Aniline <b>2a</b> .....     | 20 |
| 3.11 KIE Studies and Competition Experiments .....                      | 23 |
| 4. X-ray Crystallographic Data of Compound <b>2aa</b> .....             | 26 |
| 5. NMR Spectra.....                                                     | 34 |
| References .....                                                        | 87 |

## 1. General Information

### Solvents

Dry toluene, tetrahydrofuran, acetonitrile, cyclohexane, 1,4-dioxane, benzonitrile, and dimethylformamide were purchased from Sigma-Aldrich. Chloroform- $d_1$  and DMSO- $d_6$  were purchased from Cambridge Isotope Laboratories.

### Chromatography

Analytical thin layer chromatography was performed on 0.25 mm silica gel 60-F254. Visualization was carried out with UV light and Vogel's permanganate.

### Spectroscopy and Instruments

$^1\text{H}$  NMR was recorded on Bruker DRX-600 instrument (600 MHz). Chemical shifts were quoted in parts per million (ppm) referenced to 7.26 ppm of chloroform- $d$  or referenced to the center line of a septet at 2.50 ppm of DMSO- $d_6$ .  $^{13}\text{C}$  NMR spectra were recorded on Bruker DRX-600 instrument (150 MHz), and were fully decoupled by broad band proton decoupling. Chemical shifts were reported in ppm referenced to either the center line of a triplet at 77.0 ppm of chloroform- $d$  or referenced to the center line of a septet at 39.52 ppm of DMSO- $d_6$ .  $^{19}\text{F}$  NMR spectra were recorded on Bruker AMX-400 instrument (376 MHz), and were fully decoupled by broad band proton decoupling. The following abbreviations (or combinations thereof) were used to explain multiplicities: s = singlet, d = doublet, t = triplet, q = quartet, p = pentet, sext = sextet, sep = septet, m = multiplet, br = broad. Coupling constants,  $J$ , were reported in Hertz unit (Hz). High-resolution mass spectra (HRMS) were recorded on an Agilent Mass spectrometer using ESI-TOF (electrospray ionization-time of flight).

### Starting materials

All substrates were used as received from commercial suppliers, unless otherwise stated.  $\text{Pd}(\text{PhCN})_2\text{Cl}_2$  and  $\text{Ag}_2\text{CO}_3$  were purchased from Sigma-Aldrich. Methyl bicyclo[2.2.1]hept-2-ene-2-carboxylate (NBE- $\text{CO}_2\text{Me}$ ) was synthesized following literature procedures.<sup>1</sup>

## 2. Substrate Structures

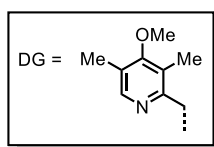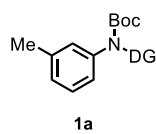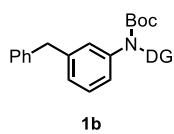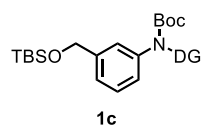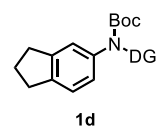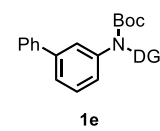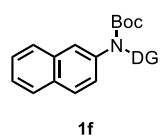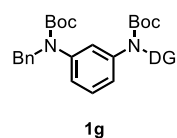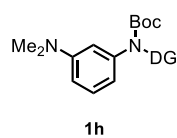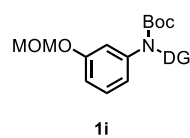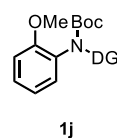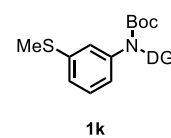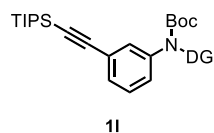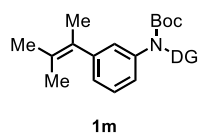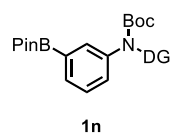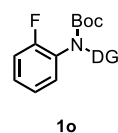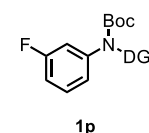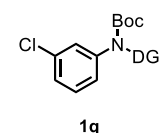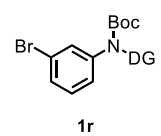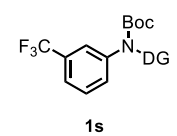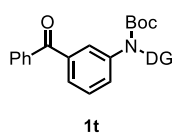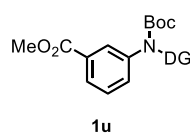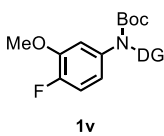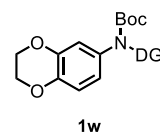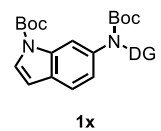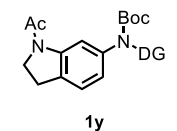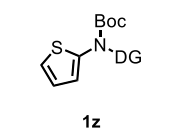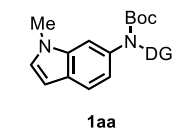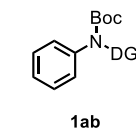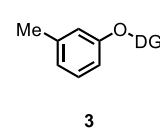

### 3. Experimental Section

#### 3.1 Preparation of Substrates

Substrates **2a–2h**, **2j**, **2k**, **2o–2ab**, and **3** were synthesized following the literature procedures.<sup>2</sup>

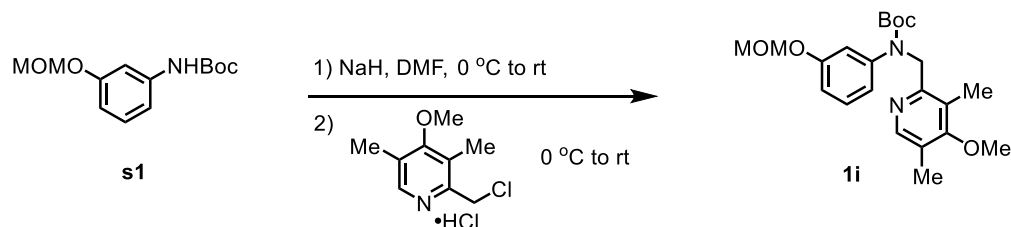

#### *tert*-Butyl ((4-methoxy-3,5-dimethylpyridin-2-yl)methyl)(3-(methoxymethoxy)phenyl)carbamate (**1i**)

To a solution of *tert*-butyl (3-(methoxymethoxy)phenyl)carbamate **s1** (557 mg, 2.2 mmol, 1.1 equiv.) in DMF (10 mL) was added NaH (240 mg, 6 mmol, 3 equiv.) at 0 °C, and the resulting mixture was allowed to warm up to room temperature and stirred for 30 min. The mixture was cooled to 0 °C again, then 2-chloromethyl-4-methoxy-3,5-dimethylpyridine hydrochloride (442 mg, 2 mmol, 1 equiv.) was added into the mixture slowly. The resulting mixture was allowed to warm up to room temperature and stirred for another 12 hours. After the reaction completed, EtOAc was added to dilute the reaction mixture, then the organic phase was washed with water, brine and dried over Na<sub>2</sub>SO<sub>4</sub>. After the organic solvent was concentrated by rotatory evaporation, the residue was purified by silica gel chromatography (hexanes/EtOAc = 5:1 v/v to 2:1 v/v) to afford 762 mg of compound **1i** as a yellow liquid (95% yield). *R*<sub>f</sub> = 0.30 (hexanes/EtOAc = 2:1 v/v).

<sup>1</sup>H NMR (600 MHz, CDCl<sub>3</sub>) δ 8.15 (s, 1H), 7.21 (t, *J* = 7.8 Hz, 1H), 6.94 (s, 1H), 6.89 (d, *J* = 7.8 Hz, 1H), 6.79 (ddd, *J* = 8.4 Hz, *J* = 7.8 Hz, *J* = 3.0 Hz, *J* = 1.2 Hz, 1H), 5.09 (s, 2H), 4.89 (s, 2H), 3.72 (s, 3H), 3.42 (s, 3H), 2.20 (s, 6H), 1.40 (s, 9H); <sup>13</sup>C NMR (150 MHz, CDCl<sub>3</sub>) δ 163.61, 157.10, 154.97, 154.59, 148.91, 143.94, 128.83, 124.59, 123.64, 119.88, 114.84, 113.23, 94.45, 80.31, 59.79, 55.85, 53.41, 28.20, 13.16, 10.35. HRMS (ESI-TOF) *m/z* calc'd for C<sub>22</sub>H<sub>31</sub>N<sub>2</sub>O<sub>5</sub> [M+H]<sup>+</sup>: 403.2227; found: 403.2230.

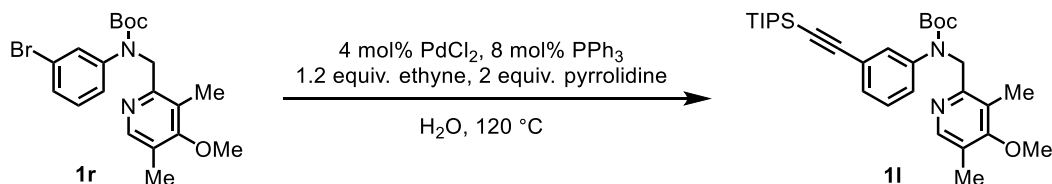

#### *tert*-Butyl ((4-methoxy-3,5-dimethylpyridin-2-yl)methyl)(3-((triisopropylsilyl)ethynyl)phenyl)carbamate (**1l**).

Aryl bromide **1r** (210 mg, 0.5 mmol, 1 equiv.), PdCl<sub>2</sub> (3.5 mg, 20 μmol, 4 mol%), and PPh<sub>3</sub> (10.5 mg, 40 μmol, 8 mol%) were added to a flame-dried Schlenk tube. The Schlenk tube was evacuated and back-filled with nitrogen. H<sub>2</sub>O (2 mL), pyrrolidine (83.5 μL, 1 mmol, 2 equiv.), and ethynyltriisopropylsilane (137 μL, 0.6 mmol, 1.2 equiv.) were added to the mixture. The Schlenk tube was immersed into a pre-heated oil bath at 120 °C. After 2 h, the oil bath was removed, and the Schlenk tube was allowed to cool to room temperature. The reaction mixture was extracted with EtOAc (3 × 5 mL). The combined organic layers were dried with Na<sub>2</sub>SO<sub>4</sub>. After the organic solvent was concentrated by rotatory evaporation, the residue was purified by silica gel chromatography (hexanes/EtOAc = 8:1 v/v to 4:1 v/v) to afford 183 mg of compound **1l** as a yellow liquid (70% yield). *R*<sub>f</sub> = 0.66 (hexanes/EtOAc = 2:1 v/v).

<sup>1</sup>H NMR (600 MHz, CDCl<sub>3</sub>) δ 8.14 (s, 1H), 7.30 (s, 1H), 7.23–7.18 (m, 2H), 7.15 (t, *J* = 7.8 Hz, 1H), 4.90 (s, 2H), 3.72 (s, 3H), 2.20 (s, 6H), 1.40 (s, 9H), 1.10 (s, 21H); <sup>13</sup>C NMR (150 MHz, CDCl<sub>3</sub>) δ 163.72, 154.79, 154.55, 148.97, 142.63, 130.10, 129.26, 128.19, 126.95, 124.75, 123.81, 123.59, 106.77, 90.37, 80.52, 59.83,

53.23, 26.21, 18.62, 13.17, 11.27, 10.43. HRMS (ESI-TOF)  $m/z$  calc'd for  $C_{31}H_{47}N_2O_3Si$   $[M+H]^+$ : 523.3350; found: 523.3347.

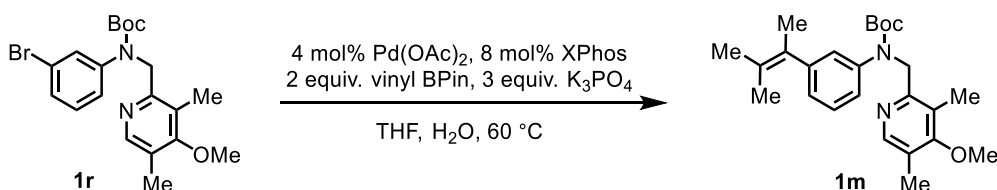

**tert-Butyl ((4-methoxy-3,5-dimethylpyridin-2-yl)methyl)(3-(3-methylbut-2-en-2-yl)phenyl)carbamate (1m).**

Aryl bromide **1r** (210 mg, 0.5 mmol, 1 equiv.),  $Pd(OAc)_2$  (4.5 mg, 20  $\mu$ mol, 4 mol%), XPhos (19 mg, 40  $\mu$ mol, 8 mol%), and aqueous  $K_3PO_4$  (0.5 M, 3 mL, 1.5 mmol, 3 equiv.) were added to a flame-dried Schlenk tube. The Schlenk tube was evacuated and back-filled with nitrogen. THF (5 mL) and 4,4,5,5-tetramethyl-2-(3-methylbut-2-en-2-yl)-1,3,2-dioxaborolane (0.22 mL, 1 mmol, 2 equiv.) were added to the mixture. The Schlenk tube was immersed into a pre-heated oil bath at 60 °C. After 2 h, the oil bath was removed, and the Schlenk tube was allowed to cool to room temperature. The reaction mixture was extracted with EtOAc (3  $\times$  5 mL). The combined organic layers were dried with  $Na_2SO_4$ . After the organic solvent was concentrated by rotatory evaporation, the residue was purified by silica gel chromatography (hexanes/EtOAc = 8:1 v/v to 2:1 v/v) to afford 193 mg of compound **1m** as a yellow liquid (94% yield).  $R_f$  = 0.58 (hexanes/EtOAc = 2:1 v/v).

$^1H$  NMR (600 MHz,  $CDCl_3$ )  $\delta$  8.11 (s, 1H), 7.15 (t,  $J$  = 7.8 Hz, 1H), 7.03 (d,  $J$  = 8.0 Hz, 1H), 6.88 (s, 1H), 6.85 (d,  $J$  = 7.4 Hz, 1H), 4.93 (s, 2H), 3.71 (s, 3H), 2.20 (s, 3H), 2.18 (s, 3H), 1.85 (s, 3H), 1.75 (s, 3H), 1.46 (s, 3H), 1.39 (s, 9H);  $^{13}C$  NMR (150 MHz,  $CDCl_3$ )  $\delta$  163.66, 155.18, 154.77, 148.88, 145.37, 142.04, 129.60, 127.91, 127.18, 127.11, 125.70, 124.63, 124.06, 123.70, 80.10, 59.78, 53.53, 28.27, 21.96, 20.62, 20.43, 13.15, 10.46. HRMS (ESI-TOF)  $m/z$  calc'd for  $C_{25}H_{35}N_2O_3$   $[M+H]^+$ : 411.2642; found: 411.2640.

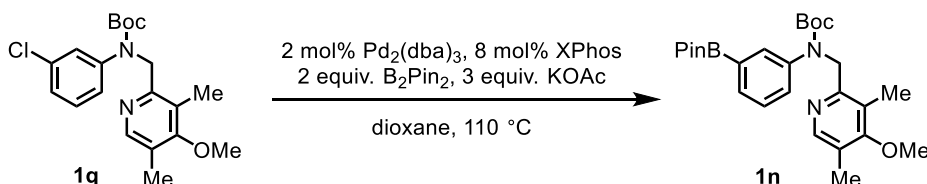

**tert-Butyl ((4-methoxy-3,5-dimethylpyridin-2-yl)methyl)(3-(4,4,5,5-tetramethyl-1,3,2-dioxaborolan-2-yl)phenyl)carbamate (1n).**

Aryl chloride **1q** (113 mg, 0.3 mmol, 1 equiv.),  $Pd_2(dba)_3$  (5.5 mg, 6.0  $\mu$ mol, 2 mol%), XPhos (11.4 mg, 24  $\mu$ mol, 8 mol%), KOAc (88.3 mg, 0.9 mmol, 3 equiv.), and  $B_2Pin_2$  (229 mg, 0.9 mmol, 3 equiv.) were added to a flame-dried Schlenk tube. The Schlenk tube was evacuated and back-filled with nitrogen. Dioxane (1 mL) was added to the mixture. The Schlenk tube was immersed into a pre-heated oil bath at 110 °C. After 1 h, the oil bath was removed, and the Schlenk tube was allowed to cool to room temperature. The reaction mixture was poured into water (5 mL) and extracted with EtOAc (3  $\times$  7 mL). The combined organic layers were dried with  $Na_2SO_4$ . After the solvent was concentrated by rotatory evaporation, the residue was purified by silica gel chromatography (hexanes/EtOAc = 4:1 v/v) to afford 77.3 mg of compound **1n** as a yellow liquid (55% yield).  $R_f$  = 0.44 (hexanes/EtOAc = 2:1 v/v).

$^1H$  NMR (600 MHz,  $CDCl_3$ )  $\delta$  8.12 (s, 1H), 7.60 (s, 1H), 7.54 (d,  $J$  = 7.3 Hz, 1H), 7.32 (d,  $J$  = 7.9 Hz, 1H), 7.22 (t,  $J$  = 7.6 Hz, 1H), 4.92 (s, 2H), 3.71 (s, 3H), 2.21 (s, 3H), 2.19 (s, 3H), 1.39 (s, 9H), 1.31 (s, 12H);  $^{13}C$  NMR (150 MHz,  $CDCl_3$ )  $\delta$  163.69, 155.17, 154.78, 148.88, 142.09, 132.79, 132.10, 130.03, 127.80, 124.62, 123.97, 83.71, 80.18, 59.81, 53.42, 28.25, 24.85, 13.16, 10.51. HRMS (ESI-TOF)  $m/z$  calc'd for  $C_{26}H_{38}BN_2O_5$   $[M+H]^+$ : 469.2868; found: 469.2858.

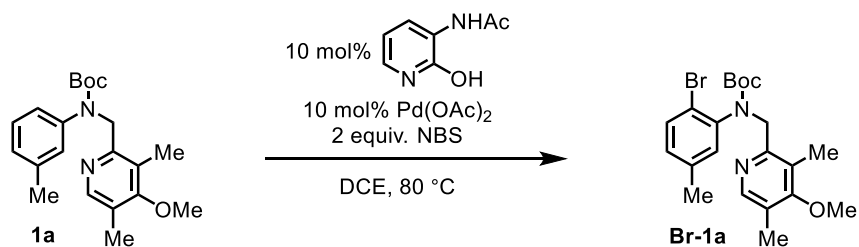

***tert*-Butyl (2-bromo-5-methylphenyl)((4-methoxy-3,5-dimethylpyridin-2-yl)methyl)carbamate (**Br-1a**).**

Arene **1a** (1.07 g, 3 mmol, 1 equiv.), Pd(OAc)<sub>2</sub> (67.2 mg, 0.3 mmol, 10 mol%), *N*-(2-hydroxypyridin-3-yl)acetamide (45.6 mg, 0.3 mmol, 10 mol%), and NBS (1.07 g, 6 mmol, 2 equiv.) were added to a flame-dried Schlenk tube. DCE (30 mL) was added to the mixture. The Schlenk tube was immersed into a pre-heated oil bath at 80 °C. After 14 h, the oil bath was removed, and the Schlenk tube was allowed to cool to room temperature. The reaction mixture was filtered through Celite and eluted with EtOAc (3 × 15 mL). The filtrate was evaporated under reduced pressure. The residue was purified by silica gel chromatography (hexanes/EtOAc = 6:1 v/v to 4:1 v/v) to afford 811 mg of compound **Br-1a** as a white solid (62% yield). *R*<sub>f</sub> = 0.54 (hexanes/EtOAc = 2:1 v/v).

<sup>1</sup>H NMR (600 MHz, CDCl<sub>3</sub>) δ 8.14 (s, 1H), 7.35 (d, *J* = 8.5 Hz, 1H), 7.15 (s, 1H), 6.93 (d, *J* = 8.6 Hz, 1H), 4.86 (s, 2H), 3.73 (s, 3H), 2.30 (s, 3H), 2.21 (s, 3H), 2.20 (s, 3H), 1.39 (s, 9H); <sup>13</sup>C NMR (150 MHz, CDCl<sub>3</sub>) δ 163.70, 154.80, 154.48, 148.98, 142.00, 137.76, 131.96, 128.64, 125.54, 124.76, 123.68, 121.35, 80.53, 59.86, 53.32, 28.22, 22.93, 13.22, 10.39. HRMS (ESI-TOF) *m/z* calc'd for C<sub>21</sub>H<sub>28</sub>BrN<sub>2</sub>O<sub>3</sub> [M+H]<sup>+</sup>: 435.1278; found: 435.1275.

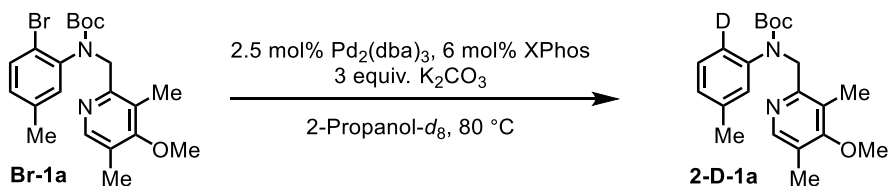

***tert*-Butyl ((4-methoxy-3,5-dimethylpyridin-2-yl)methyl)(3-methylphenyl-6-*d*)carbamate (**2-D-1a**).**

Aryl bromide **Br-1a** (610 mg, 1.4 mmol, 1 equiv.), Pd<sub>2</sub>(dba)<sub>3</sub> (32.1 mg, 35 μmol, 2.5 mol%), XPhos (40.1 mg, 84 μmol, 6 mol%), and K<sub>2</sub>CO<sub>3</sub> (580 mg, 4.2 mmol, 3 equiv.) were added to a flame-dried Schlenk tube. The Schlenk tube was evacuated and back-filled with nitrogen. 2-Propanol-*d*<sub>8</sub> (4 mL) was added to the mixture. The Schlenk tube was immersed into a pre-heated oil bath at 80 °C. After 14 h, the oil bath was removed, and the Schlenk tube was allowed to cool to room temperature. The reaction mixture was filtered through Celite and eluted with EtOAc (3 × 8 mL). The filtrate was evaporated under reduced pressure. The residue was purified by silica gel chromatography (hexanes/EtOAc = 8:1 v/v to 4:1 v/v) to afford 403 mg of compound **2-D-1a** as a white solid (81% yield). *R*<sub>f</sub> = 0.48 (hexanes/EtOAc = 2:1 v/v).

<sup>1</sup>H NMR (600 MHz, CDCl<sub>3</sub>) δ 8.15 (s, 1H), 7.09 (d, *J* = 8.0 Hz, 1H), 7.06 (s, 1H), 7.02 (d, *J* = 8.2 Hz, 1H), 4.89 (s, 2H), 3.71 (s, 3H), 2.26 (s, 3H), 2.20 (s, 6H), 1.39 (s, 9H); <sup>13</sup>C NMR (150 MHz, CDCl<sub>3</sub>) δ 163.53, 155.10, 154.69, 148.82, 142.63, 137.84, 127.86, 126.87, 125.90 (t, *J* = 23.9 Hz), 124.48, 123.59, 123.41, 80.03, 59.73, 53.44, 28.16, 21.19, 13.10, 10.31. HRMS (ESI-TOF) *m/z* calc'd for C<sub>21</sub>H<sub>28</sub>DN<sub>2</sub>O<sub>3</sub> [M+H]<sup>+</sup>: 358.2235; found: 358.2230.

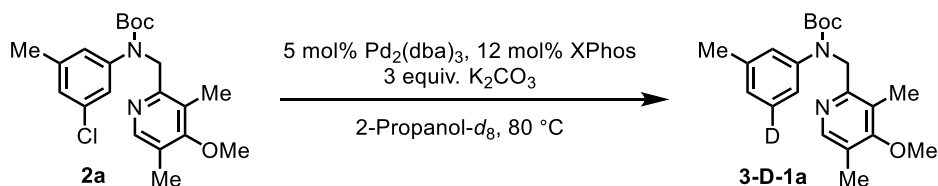

***tert*-Butyl ((4-methoxy-3,5-dimethylpyridin-2-yl)methyl)(3-methylphenyl-5-*d*)carbamate (**3-D-1a**).**

Aryl chloride **2a** (587 mg, 1.5 mmol, 1 equiv.), Pd<sub>2</sub>(dba)<sub>3</sub> (68.7 mg, 75 μmol, 5 mol%), XPhos (85.9 mg, 180 μmol, 12 mol%), and K<sub>2</sub>CO<sub>3</sub> (620 mg, 4.5 mmol, 3 equiv.) were added to a flame-dried Schlenk tube. The Schlenk tube was evacuated and back-filled with nitrogen. 2-Propanol-*d*<sub>8</sub> (4 mL) was added to the mixture. The Schlenk tube was immersed into a pre-heated oil bath at 80 °C. After 24 h, the oil bath was removed, and the Schlenk tube was allowed to cool to room temperature. The reaction mixture was filtered through Celite and eluted with EtOAc (3 × 8 mL). The filtrate was evaporated under reduced pressure. The residue was purified by silica gel chromatography (hexanes/EtOAc = 15:1 v/v to 4:1 v/v) to afford 326 mg of compound **3-D-1a** as a white solid (61% yield). *R*<sub>f</sub> = 0.48 (hexanes/EtOAc = 2:1 v/v).

<sup>1</sup>H NMR (600 MHz, CDCl<sub>3</sub>) δ 8.15 (s, 1H), 7.06 (s, 1H), 7.01 (s, 1H), 6.91 (s, 1H), 4.90 (s, 2H), 3.72 (s, 3H), 2.27 (s, 3H), 2.20 (s, 6H), 1.39 (s, 9H); <sup>13</sup>C NMR (150 MHz, CDCl<sub>3</sub>) δ 163.64, 155.18, 154.79, 148.91, 142.68, 138.05, 127.79 (t, *J* = 24.6 Hz), 126.97, 126.21, 124.60, 123.73, 123.41, 80.17, 59.83, 53.52, 28.25, 21.34, 13.20, 10.41. HRMS (ESI-TOF) *m/z* calc'd for C<sub>21</sub>H<sub>28</sub>DN<sub>2</sub>O<sub>3</sub> [M+H]<sup>+</sup>: 358.2235; found: 358.2239.

### 3.2 Preparation of Ligands

Ligand **6** was synthesized following the literature procedures.<sup>3</sup>

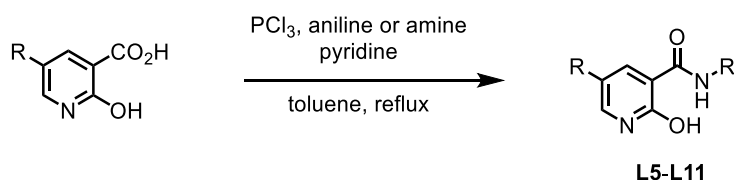

**General procedure:** Hydroxypyridine (1.65 mmol, 1.1 equiv) was added into a Schlenk tube. Toluene (5 mL), amine (1.5 mmol, 1.0 equiv), pyridine (1 drop) and PCl<sub>3</sub> (65 μL, 0.75 mmol, 0.5 equiv.) were added in sequence. The tube was sealed and immersed into a pre-heated oil bath at 115 °C. After 12 hours, the oil bath was removed, and the tube was allowed to cool to room temperature. The reaction mixture was poured into water (10 mL) and extracted with EtOAc (5 × 15 mL). The combined organic layers were dried with Na<sub>2</sub>SO<sub>4</sub>. After the solvent was concentrated by rotatory evaporation, the residue was purified by silica gel chromatography to afford the desired ligands.

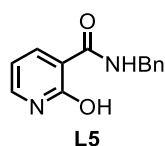

#### *N*-Benzyl-2-hydroxynicotinamide (**L5**)

Purification by flash silica gel column chromatography (hexanes/EtOAc = 1:1 v/v to EA) afforded 0.203 g of compound **L5** as a white solid (59% yield). *R*<sub>f</sub> = 0.31 (EtOAc).

<sup>1</sup>H NMR (600 MHz, DMSO-*d*<sub>6</sub>) δ 12.51 (brs, 1H), 10.16 (t, *J* = 6.0 Hz, 1H), 8.41–8.30 (m, 1H), 7.71 (dd, *J* = 6.3, 2.2 Hz, 1H), 7.36–7.28 (m, 4H), 7.25 (t, *J* = 7.0 Hz, 1H), 6.49 (t, *J* = 6.6 Hz, 1H), 4.52 (d, *J* = 5.9 Hz, 2H); <sup>13</sup>C NMR (150 MHz, DMSO-*d*<sub>6</sub>) δ 163.32, 162.32, 144.12, 139.50, 139.27, 128.44, 127.33, 126.91, 120.23, 106.34, 42.27. HRMS (ESI-TOF) *m/z* calc'd for C<sub>13</sub>H<sub>13</sub>N<sub>2</sub>O<sub>2</sub> [M+H]<sup>+</sup>: 229.0972; found: 229.0969.

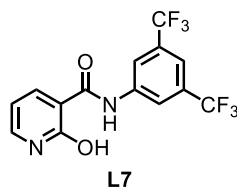

#### *N*-(3,5-Bis(trifluoromethyl)phenyl)-2-hydroxynicotinamide (**L7**)

Purification by flash silica gel column chromatography (hexanes/EtOAc = 1:2 v/v) afforded 0.316 g of compound **L7** as a white solid (60% yield). *R<sub>f</sub>* = 0.21 (hexanes/EtOAc = 1:1 v/v).

<sup>1</sup>H NMR (600 MHz, DMSO-*d*<sub>6</sub>) δ 12.86 (brs, 1H), 12.62 (s, 1H), 8.49–8.39 (m, 1H), 8.39–8.27 (m, 2H), 7.90–7.80 (m, 1H), 7.79–7.67 (m, 1H), 6.63–6.53 (m, 1H); <sup>13</sup>C NMR (150 MHz, DMSO-*d*<sub>6</sub>) δ 162.47, 145.14, 141.01, 140.18, 130.88 (q, *J* = 32.7 Hz), 123.17 (q, *J* = 272.7 Hz), 119.72, 119.09, 116.47, 107.08; <sup>19</sup>F NMR (376 MHz, DMSO-*d*<sub>6</sub>) δ -61.37. HRMS (ESI-TOF) *m/z* calc'd for C<sub>14</sub>H<sub>9</sub>F<sub>6</sub>N<sub>2</sub>O<sub>2</sub> [M+H]<sup>+</sup>: 351.0563; found: 351.0554.

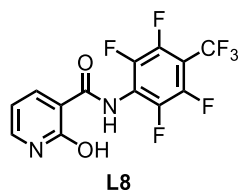

### 2-Hydroxy-*N*-(2,3,5,6-tetrafluoro-4-(trifluoromethyl)phenyl)nicotinamide (**L8**)

Purification by flash silica gel column chromatography (hexanes/EtOAc = 1:1 v/v to EA) afforded 0.275 g of compound **L8** as a white solid (52% yield). *R<sub>f</sub>* = 0.57 (EtOAc).<sup>4</sup>

<sup>1</sup>H NMR (600 MHz, DMSO-*d*<sub>6</sub>) δ 12.96 (s, 1H), 12.22 (s, 1H), 8.48 (dd, *J* = 7.2, 2.2 Hz, 1H), 7.92 (dd, *J* = 6.3, 2.2 Hz, 1H), 6.62 (dd, *J* = 7.2, 6.2 Hz, 1H); <sup>13</sup>C NMR (150 MHz, DMSO-*d*<sub>6</sub>) δ 162.62, 161.40, 145.73, 141.63, 118.18, 107.23; <sup>19</sup>F NMR (376 MHz, DMSO-*d*<sub>6</sub>) δ -54.73 (t, *J* = 21.1 Hz, 3H), -141.87–-142.27 (m, 2H), -142.64–-142.96 (m, 2H). HRMS (ESI-TOF) *m/z* calc'd for C<sub>13</sub>H<sub>6</sub>F<sub>7</sub>N<sub>2</sub>O<sub>2</sub> [M+H]<sup>+</sup>: 355.0312; found: 355.0302.

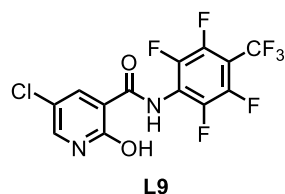

### 5-Chloro-2-hydroxy-*N*-(2,3,5,6-tetrafluoro-4-(trifluoromethyl)phenyl)nicotinamide (**L9**)

Purification by flash silica gel column chromatography (hexanes/EtOAc = 2:1 v/v to EA) afforded 0.301 g of compound **L9** as a white solid (52% yield). *R<sub>f</sub>* = 0.44 (hexanes/EtOAc = 1:1 v/v).<sup>4</sup>

<sup>1</sup>H NMR (600 MHz, DMSO-*d*<sub>6</sub>) δ 13.36 (s, 1H), 12.04 (s, 1H), 8.37 (d, *J* = 3.0 Hz, 1H), 8.18 (d, *J* = 3.1 Hz, 1H); <sup>13</sup>C NMR (150 MHz, DMSO-*d*<sub>6</sub>) δ 161.34, 160.31, 144.94, 139.82, 119.13, 112.30; <sup>19</sup>F NMR (376 MHz, DMSO-*d*<sub>6</sub>) δ -54.77 (t, *J* = 21.2 Hz, 3H), -141.77–-142.02 (m, 2H), -142.50–-142.85 (m, 2H). HRMS (ESI-TOF) *m/z* calc'd for C<sub>13</sub>H<sub>5</sub>ClF<sub>7</sub>N<sub>2</sub>O<sub>2</sub> [M+H]<sup>+</sup>: 388.9922; found: 388.9917.

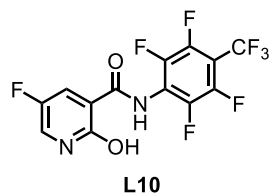

### 5-Fluoro-2-hydroxy-*N*-(2,3,5,6-tetrafluoro-4-(trifluoromethyl)phenyl)nicotinamide (**L10**)

Purification by flash silica gel column chromatography (hexanes/EtOAc = 2:1 v/v to EA) afforded 0.248 g of compound **L10** as a white solid (44% yield). *R<sub>f</sub>* = 0.34 (hexanes/EtOAc = 1:1 v/v).<sup>4</sup>

<sup>1</sup>H NMR (600 MHz, DMSO-*d*<sub>6</sub>) δ 13.13 (brs, 1H), 12.26 (s, 1H), 8.47–8.35 (m, 1H), 8.17 (t, *J* = 3.3 Hz, 1H); <sup>13</sup>C NMR (150 MHz, DMSO-*d*<sub>6</sub>) δ 160.94, 160.54, 147.17 (d, *J* = 229.1 Hz), 135.01 (d, *J* = 23.6 Hz), 128.31 (d, *J* = 35.4 Hz), 118.25 (d, *J* = 5.7 Hz). <sup>19</sup>F NMR (376 MHz, DMSO-*d*<sub>6</sub>) δ -54.85 (t, *J* = 21.2 Hz, 3H), -141.84–-142.14 (m, 2H), -142.49–-142.94 (m, 2H), -146.68 (s, 1H). HRMS (ESI-TOF) *m/z* calc'd for C<sub>13</sub>H<sub>5</sub>F<sub>8</sub>N<sub>2</sub>O<sub>2</sub> [M+H]<sup>+</sup>: 373.0218; found: 373.0212.



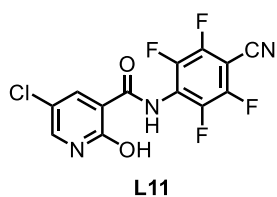

### 5-Chloro-N-(4-cyano-2,3,5,6-tetrafluorophenyl)-2-hydroxynicotinamide (L11)

Purification by flash silica gel column chromatography (hexanes/EtOAc = 2:1 v/v to EA) afforded 0.29 g of compound **L11** as a white solid (56% yield).  $R_f$  = 0.32 (hexanes/EtOAc = 1:1 v/v).

$^1\text{H}$  NMR (600 MHz, DMSO- $d_6$ )  $\delta$  13.37 (brs, 1H), 12.15 (s, 1H), 8.36 (s, 1H), 8.18 (s, 1H);  $^{13}\text{C}$  NMR (150 MHz, DMSO- $d_6$ )  $\delta$  161.36, 160.28, 146.97 (dd,  $J$  = 256.3, 15.9 Hz), 141.31 (dd,  $J$  = 250.3, 12.9 Hz), 145.04, 139.97, 123.18 (t,  $J$  = 13.1 Hz), 119.05, 112.38, 108.24, 90.22 (t,  $J$  = 18.1 Hz);  $^{19}\text{F}$  NMR (376 MHz, DMSO- $d_6$ )  $\delta$  -134.39–-134.97 (m, 2H), -141.22–-141.70 (m, 2H). HRMS (ESI-TOF)  $m/z$  calc'd for  $\text{C}_{13}\text{H}_5\text{ClF}_4\text{N}_3\text{O}_2$   $[\text{M}+\text{H}]^+$ : 346.0001; found: 346.0007.

### 3.3 Ligand Screening

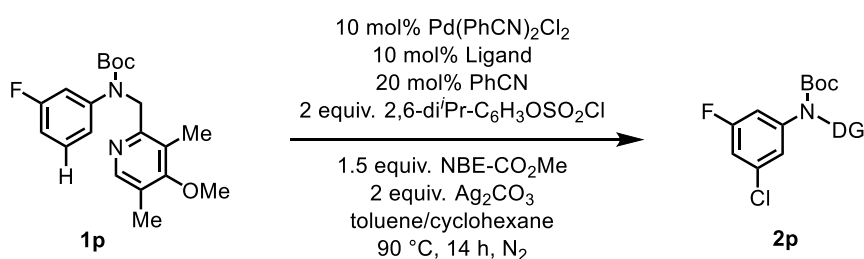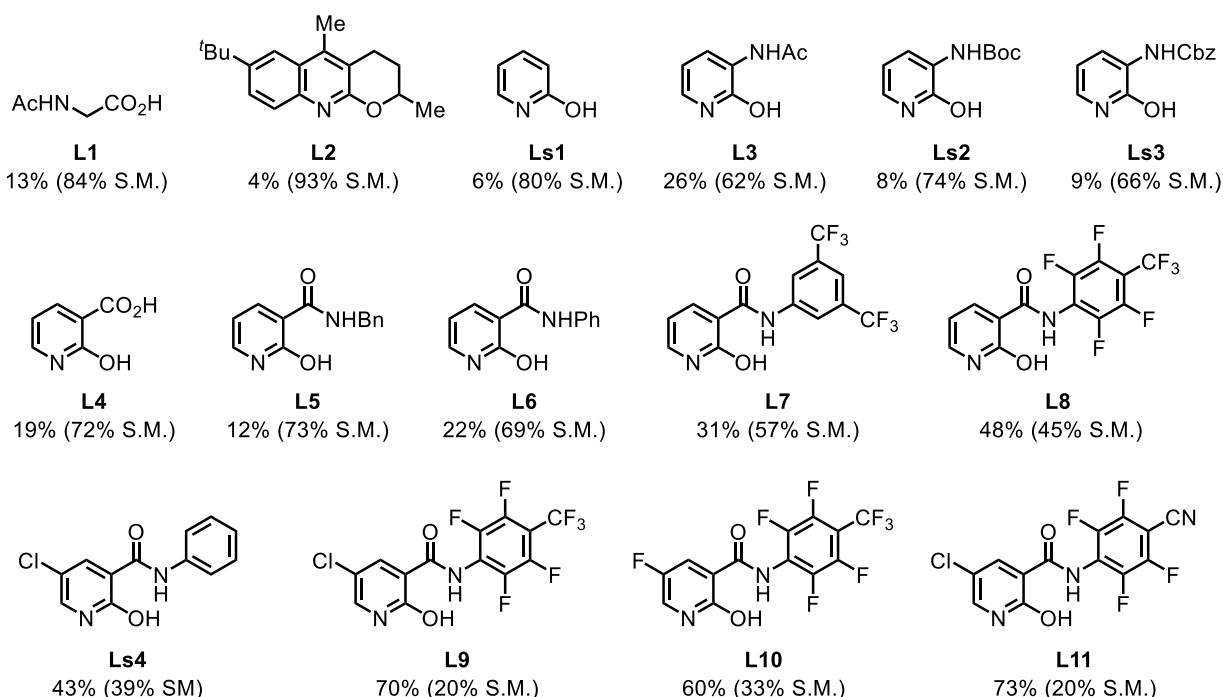

**Procedure:** Arene **1p** (36 mg, 0.10 mmol, 1.0 equiv), Pd(PhCN) $_2$ Cl $_2$  (3.8 mg, 10  $\mu$ mol, 10 mol%), Ligand (10  $\mu$ mol, 10 mol%) and Ag $_2$ CO $_3$  (55.1 mg, 0.20 mmol, 2.0 equiv.) were added into a flame-dried Schlenk tube. The Schlenk tube was evacuated and back-filled with nitrogen. Toluene (1 mL), cyclohexane (1 mL), PhCN (2  $\mu$ L, 20  $\mu$ mol, 20 mol%), NBE-CO $_2$ Me (23  $\mu$ L, 0.15 mmol, 1.5 equiv.), and 2,6-di $^i$ Pr-C $_6$ H $_4$ OSO $_2$ Cl (55 mg, 0.20 mmol, 2.0 equiv.) were added to the mixture. The Schlenk tube was immersed into a pre-heated oil bath at 90  $^\circ$ C. After 14 hours, the oil bath was removed, and the Schlenk tube was allowed to cool to room

temperature. The reaction mixture was filtered through Celite and eluted with EtOAc ( $3 \times 2$  mL). The filtrate was evaporated under reduced pressure. The yield was determined by  $^1\text{H}$  NMR analysis of the crude product using 1,1,2,2-tetrachloroethane as an internal standard.

### 3.4 Norbornene Derivatives Screening

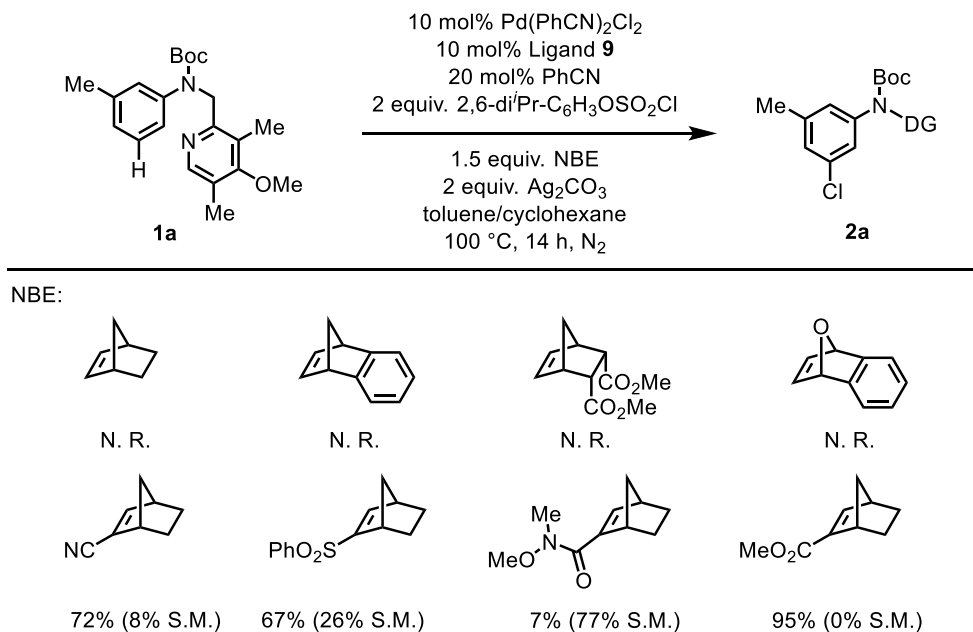

**Procedure:** Arene **1a** (35.6 mg, 0.10 mmol, 1.0 equiv),  $\text{Pd(PhCN)}_2\text{Cl}_2$  (3.8 mg, 10  $\mu\text{mol}$ , 10 mol%), Ligand **9** (3.9 mg, 10  $\mu\text{mol}$ , 10 mol%), and  $\text{Ag}_2\text{CO}_3$  (55.1 mg, 0.20 mmol, 2.0 equiv.) were added into a flame-dried Schlenk tube. The Schlenk tube was evacuated and back-filled with nitrogen. Toluene (1 mL), cyclohexane (1 mL), PhCN (2  $\mu\text{L}$ , 20  $\mu\text{mol}$ , 20 mol%), NBE derivative (0.15 mmol, 1.5 equiv.), and 2,6-di<sup>i</sup>Pr-C<sub>6</sub>H<sub>4</sub>OSO<sub>2</sub>Cl (55 mg, 0.20 mmol, 2.0 equiv.) were added to the mixture. The Schlenk tube was immersed into a pre-heated oil bath at 100 °C. After 14 hours, the oil bath was removed, and the Schlenk tube was allowed to cool to room temperature. The reaction mixture was filtered through Celite and eluted with EtOAc ( $3 \times 2$  mL). The filtrate was evaporated under reduced pressure. The yield was determined by  $^1\text{H}$  NMR analysis of the crude product using 1,1,2,2-tetrachloroethane as an internal standard.

## 3.5 Loading Screening

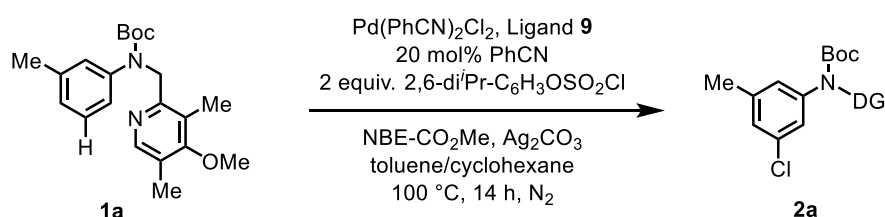

| Pd(PhCN) <sub>2</sub> Cl <sub>2</sub> /ligand L9 | NBE-CO <sub>2</sub> Me | Ag <sub>2</sub> CO <sub>3</sub> | additional base                            | NMR yield |
|--------------------------------------------------|------------------------|---------------------------------|--------------------------------------------|-----------|
| 10 mol%                                          | 1.5 equiv.             | 2.0 equiv.                      | none                                       | 95%       |
| 5 mol%                                           | 1.5 equiv.             | 2.0 equiv.                      | none                                       | 72%       |
| 10 mol%                                          | 0.5 equiv.             | 2.0 equiv.                      | none                                       | 76%       |
| 10 mol%                                          | 1.5 equiv.             | 0.3 equiv.                      | none                                       | 16%       |
| 10 mol%                                          | 1.5 equiv.             | 0.3 equiv.                      | 2.0 equiv. Li <sub>2</sub> CO <sub>3</sub> | 34%       |
| 10 mol%                                          | 1.5 equiv.             | 0.3 equiv.                      | 2.0 equiv. K <sub>2</sub> CO <sub>3</sub>  | 7%        |

**Procedure:** Arene **1a** (35.6 mg, 0.10 mmol, 1.0 equiv), Pd(PhCN)<sub>2</sub>Cl<sub>2</sub>, Ligand **9**, Ag<sub>2</sub>CO<sub>3</sub>, and additive were added into a flame-dried Schlenk tube. The Schlenk tube was evacuated and back-filled with nitrogen. Toluene (1 mL), cyclohexane (1 mL), PhCN (2 μL, 20 μmol, 20 mol%), NBE-CO<sub>2</sub>Me, and 2,6-di<sup>i</sup>Pr-C<sub>6</sub>H<sub>4</sub>OSO<sub>2</sub>Cl (55 mg, 0.20 mmol, 2.0 equiv.) were added to the mixture. The Schlenk tube was immersed into a pre-heated oil bath at 100 °C. After 14 hours, the oil bath was removed, and the Schlenk tube was allowed to cool to room temperature. The reaction mixture was filtered through Celite and eluted with EtOAc (3 × 2 mL). The filtrate was evaporated under reduced pressure. The yield was determined by <sup>1</sup>H NMR analysis of the crude product using 1,1,2,2-tetrachloroethane as an internal standard.

3.6 *meta*-C–H Chlorination of Anilines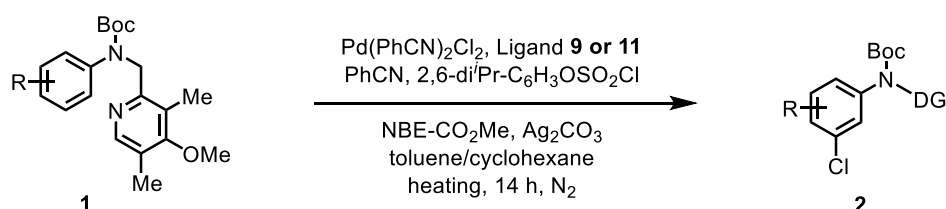

**General procedure:** Arene **1** (0.10 mmol, 1.0 equiv), Pd(PhCN)<sub>2</sub>Cl<sub>2</sub> (3.8 mg, 10 μmol, 10 mol%), Ligand (10 μmol, 10 mol%) and Ag<sub>2</sub>CO<sub>3</sub> (55 mg, 0.20 mmol, 2.0 equiv.) were added into a flame-dried Schlenk tube. The Schlenk tube was evacuated and back-filled with nitrogen. Toluene (1 mL), cyclohexane (1 mL), PhCN (2 μL, 20 μmol, 20 mol%), NBE-CO<sub>2</sub>Me (23 μL, 0.15 mmol, 1.5 equiv.) and 2,6-di<sup>i</sup>Pr-C<sub>6</sub>H<sub>4</sub>OSO<sub>2</sub>Cl (55 mg, 0.20 mmol, 2.0 equiv.) were added to the mixture. The Schlenk tube was immersed into a pre-heated oil bath at 100 °C or 110 °C. After 14 hours, the oil bath was removed, and the Schlenk tube was allowed to cool to room temperature. The reaction mixture was filtered through Celite and eluted with EtOAc (3 × 2 mL). The filtrate was evaporated under reduced pressure. Purification by preparative TLC chromatography afforded the title compound.

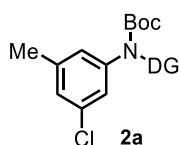

***tert*-Butyl (3-chloro-5-methylphenyl)((4-methoxy-3,5-dimethylpyridin-2-yl)methyl)carbamate (2a)**

**L9** (10 mol%), 100 °C. Purification by preparative TLC chromatography (hexanes/EtOAc = 2:1 v/v) afforded 37.2 mg of compound **2a** as a yellow liquid (93% yield).  $R_f = 0.19$  (hexanes/EtOAc = 6:1 v/v).

$^1\text{H}$  NMR (600 MHz,  $\text{CDCl}_3$ )  $\delta$  8.17 (s, 1H), 7.08 (s, 1H), 6.99 (s, 1H), 6.91 (s, 1H), 4.85 (s, 2H), 3.73 (s, 3H), 2.25 (s, 3H), 2.21 (s, 3H), 2.20 (s, 3H), 1.38 (s, 9H);  $^{13}\text{C}$  NMR (150 MHz,  $\text{CDCl}_3$ )  $\delta$  163.63, 154.69, 154.35, 148.99, 143.88, 139.40, 133.19, 126.19, 125.13, 124.68, 123.62, 123.44, 80.55, 59.83, 53.25, 28.14, 21.14, 13.17, 10.32. HRMS (ESI-TOF)  $m/z$  calc'd for  $\text{C}_{21}\text{H}_{28}\text{ClN}_2\text{O}_3$   $[\text{M}+\text{H}]^+$ : 391.1783; found: 391.1792.

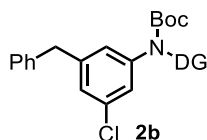***tert*-Butyl (3-benzyl-5-chlorophenyl)((4-methoxy-3,5-dimethylpyridin-2-yl)methyl)carbamate (2b)**

**L9** (10 mol%), 100 °C. Purification by preparative TLC chromatography (hexanes/EtOAc = 3:1 v/v) afforded 40.5 mg of compound **2b** as a colorless liquid (87% yield).  $R_f = 0.59$  (hexanes/EtOAc = 2:1 v/v).

$^1\text{H}$  NMR (600 MHz,  $\text{CDCl}_3$ )  $\delta$  8.13 (s, 1H), 7.25 (t,  $J = 7.0$  Hz, 2H), 7.20 (t,  $J = 7.3$  Hz, 1H), 7.16–7.05 (m, 3H), 6.99 (s, 1H), 6.90 (d,  $J = 1.9$  Hz, 1H), 4.85 (s, 2H), 3.87 (s, 2H), 3.71 (s, 3H), 2.21 (s, 3H), 2.17 (s, 3H), 1.36 (s, 9H);  $^{13}\text{C}$  NMR (150 MHz,  $\text{CDCl}_3$ )  $\delta$  163.69, 154.59, 154.33, 149.03, 143.99, 142.51, 139.99, 133.56, 128.89, 128.47, 126.26, 126.01, 125.45, 124.73, 124.09, 123.56, 80.69, 59.85, 53.23, 41.41, 28.17, 13.22, 10.35. HRMS (ESI-TOF)  $m/z$  calc'd for  $\text{C}_{27}\text{H}_{32}\text{ClN}_2\text{O}_3$   $[\text{M}+\text{H}]^+$ : 467.2096; found: 467.2105.

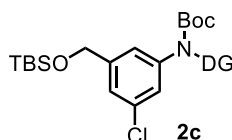***tert*-Butyl (3-(((tert-butyldimethylsilyloxy)methyl)-5-chlorophenyl)((4-methoxy-3,5-dimethylpyridin-2-yl)methyl)carbamate (2c)**

**L9** (10 mol%), 100 °C. Purification by preparative TLC chromatography (hexanes/EtOAc = 7:2 v/v) afforded 45.8 mg of compound **2c** as a colorless liquid (88% yield).  $R_f = 0.75$  (hexanes/EtOAc = 2:1 v/v).

$^1\text{H}$  NMR (600 MHz,  $\text{CDCl}_3$ )  $\delta$  8.16 (s, 1H), 7.18 (s, 1H), 7.10 (s, 1H), 7.06 (s, 1H), 4.86 (s, 2H), 4.63 (s, 2H), 3.73 (s, 3H), 2.21 (s, 3H), 2.19 (s, 3H), 1.39 (s, 9H), 0.89 (s, 9H), 0.05 (s, 6H);  $^{13}\text{C}$  NMR (150 MHz,  $\text{CDCl}_3$ )  $\delta$  163.64, 154.58, 154.38, 149.07, 144.04, 143.21, 133.41, 124.92, 124.69, 123.38, 122.90, 121.70, 80.64, 64.04, 59.85, 53.24, 28.18, 25.85, 18.29, 13.19, 10.31, -5.38. HRMS (ESI-TOF)  $m/z$  calc'd for  $\text{C}_{27}\text{H}_{42}\text{ClN}_2\text{O}_4\text{Si}$   $[\text{M}+\text{H}]^+$ : 521.2597; found: 521.2603.

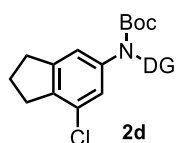***tert*-Butyl (7-chloro-2,3-dihydro-1H-inden-5-yl)((4-methoxy-3,5-dimethylpyridin-2-yl)methyl)carbamate (2d)**

**L11** (10 mol%), 110 °C. Purification by preparative TLC chromatography (hexanes/EtOAc = 3:1 v/v) afforded 30.0 mg of compound **2d** as a colorless liquid (72% yield).  $R_f = 0.56$  (hexanes/EtOAc = 2:1 v/v).

$^1\text{H}$  NMR (600 MHz,  $\text{CDCl}_3$ )  $\delta$  8.16 (s, 1H), 7.03 (s, 2H), 4.84 (s, 2H), 3.73 (s, 3H), 2.88 (p,  $J = 7.5$  Hz, 4H), 2.22 (s, 3H), 2.20 (s, 3H), 2.04 (p,  $J = 7.5$  Hz, 2H), 1.38 (s, 9H);  $^{13}\text{C}$  NMR (150 MHz,  $\text{CDCl}_3$ )  $\delta$  163.66, 154.89, 154.68, 148.99, 145.90, 142.37, 139.68, 129.67, 124.67, 124.59, 123.57, 120.98, 80.40, 59.86, 53.59, 33.71, 31.76, 28.22, 24.56, 13.20, 10.38. HRMS (ESI-TOF)  $m/z$  calc'd for  $\text{C}_{23}\text{H}_{30}\text{ClN}_2\text{O}_3$   $[\text{M}+\text{H}]^+$ : 417.1939; found: 417.1956.

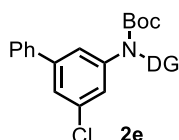

**tert-Butyl (5-chloro-[1,1'-biphenyl]-3-yl)((4-methoxy-3,5-dimethylpyridin-2-yl)methyl)carbamate (2e)**

**L9** (10 mol%), 100 °C. Purification by preparative TLC chromatography (hexanes/EtOAc = 5:1 v/v) afforded 37.1 mg of compound **2e** as a yellow liquid (82% yield).  $R_f$  = 0.71 (hexanes/EtOAc = 2:1 v/v).

$^1\text{H}$  NMR (600 MHz,  $\text{CDCl}_3$ , compound exists as a 73:27 mixture of rotamers)  $\delta$  8.19 (s, 0.73H), 8.17 (s, 0.27H), 7.48 (d,  $J$  = 7.5 Hz, 1.5H), 7.44–7.24 (m, 6H), 7.22 (s, 0.25H), 7.17 (t,  $J$  = 1.7 Hz, 0.27H), 4.93 (s, 1.45H), 4.92 (s, 0.54H), 3.73 (s, 3H), 2.24–2.19 (m, 6H), 1.42 (s, 6.48H), 1.40 (s, 2.51H);  $^{13}\text{C}$  NMR (150 MHz,  $\text{CDCl}_3$ , compound exists as a 73:27 mixture of rotamers)  $\delta$  163.72, 154.63, 154.55, 154.33, 149.07, 144.31, 143.71, 142.58, 140.49, 139.62, 138.90, 133.91, 133.24, 132.29, 131.15, 129.88, 128.94, 128.75, 127.78, 127.75, 127.04, 126.81, 126.44, 125.88, 125.53, 125.19, 124.83, 124.79, 124.24, 123.59, 80.79, 59.86, 53.27, 53.24, 28.22, 13.20, 10.39. HRMS (ESI-TOF)  $m/z$  calc'd for  $\text{C}_{26}\text{H}_{30}\text{ClN}_2\text{O}_3$   $[\text{M}+\text{H}]^+$ : 453.1939; found: 453.1946.

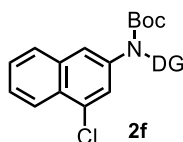

**tert-Butyl (4-chloronaphthalen-2-yl)((4-methoxy-3,5-dimethylpyridin-2-yl)methyl)carbamate (2f)**

**L9** (15 mol%), 100 °C. Purification by preparative TLC chromatography (hexanes/EtOAc = 2:1 v/v) afforded 28.8 mg of compound **2f** as a yellow liquid (67% yield).  $R_f$  = 0.49 (hexanes/EtOAc = 2:1 v/v).  $^1\text{H}$  NMR (600 MHz,  $\text{CDCl}_3$ )  $\delta$  8.21–8.12 (m, 2H), 7.72 (d,  $J$  = 8.1 Hz, 1H), 7.62 (s, 2H), 7.51 (t,  $J$  = 7.6 Hz, 1H), 7.46 (t,  $J$  = 7.5 Hz, 1H), 5.00 (s, 2H), 3.73 (s, 3H), 2.24 (s, 3H), 2.21 (s, 3H), 1.42 (s, 9H);  $^{13}\text{C}$  NMR (150 MHz,  $\text{CDCl}_3$ )  $\delta$  163.72, 154.65, 154.48, 149.08, 140.30, 134.11, 131.10, 128.77, 128.12, 126.71, 126.48, 126.33, 124.81, 124.06, 123.61, 122.69, 80.85, 59.87, 53.46, 28.23, 13.20, 10.42. HRMS (ESI-TOF)  $m/z$  calc'd for  $\text{C}_{24}\text{H}_{28}\text{ClN}_2\text{O}_3$   $[\text{M}+\text{H}]^+$ : 427.1783; found: 427.1795.

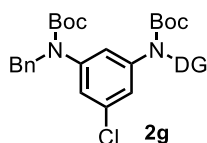

**tert-Butyl (3-(benzyl(tert-butoxycarbonyl)amino)-5-chlorophenyl)((4-methoxy-3,5-dimethylpyridin-2-yl)methyl)carbamate (2g)**

**L9** (10 mol%), 100 °C. Purification by preparative TLC chromatography (hexanes/EtOAc = 4:1 v/v) afforded 45.2 mg of compound **2g** as a colorless liquid (78% yield).  $R_f$  = 0.52 (hexanes/EtOAc = 2:1 v/v).

$^1\text{H}$  NMR (600 MHz,  $\text{CDCl}_3$ )  $\delta$  8.11 (s, 1H), 7.25 (t,  $J$  = 7.4 Hz, 2H), 7.21 (t,  $J$  = 7.2 Hz, 1H), 7.17–7.10 (m, 3H), 7.03 (s, 1H), 6.96 (s, 1H), 4.77 (s, 2H), 4.73 (s, 2H), 3.72 (s, 3H), 2.20 (s, 3H), 2.15 (s, 3H), 1.38 (s, 9H), 1.35 (s, 9H);  $^{13}\text{C}$  NMR (150 MHz,  $\text{CDCl}_3$ )  $\delta$  163.65, 154.40, 154.19, 154.15, 149.02, 144.21, 143.53, 138.17, 133.09, 128.37, 127.06, 124.69, 123.71, 123.32, 122.13, 80.94, 80.75, 59.86, 53.74, 53.14, 28.15, 28.14, 13.19, 10.28. HRMS (ESI-TOF)  $m/z$  calc'd for  $\text{C}_{32}\text{H}_{41}\text{ClN}_3\text{O}_5$   $[\text{M}+\text{H}]^+$ : 582.2729; found: 582.2739.

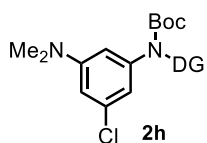

**tert-Butyl (3-chloro-5-(dimethylamino)phenyl)((4-methoxy-3,5-dimethylpyridin-2-yl)methyl)carbamate (2h)**

**L9** (10 mol%), 100 °C. Purification by preparative TLC chromatography (hexanes/EtOAc = 2:1 v/v) afforded 31.0 mg of compound **2h** as a yellow liquid (74% yield).  $R_f = 0.40$  (hexanes/EtOAc = 2:1 v/v).

$^1\text{H NMR}$  (600 MHz,  $\text{CDCl}_3$ )  $\delta$  8.16 (s, 1H), 6.58 (s, 1H), 6.53 (s, 1H), 6.44 (t,  $J = 2.1$  Hz, 1H), 4.86 (s, 2H), 3.72 (s, 3H), 2.85 (s, 6H), 2.21 (s, 3H), 2.19 (s, 3H), 1.40 (s, 9H);  $^{13}\text{C NMR}$  (150 MHz,  $\text{CDCl}_3$ )  $\delta$  163.63, 154.98, 154.55, 151.11, 148.93, 144.38, 134.09, 124.63, 123.67, 114.76, 109.78, 109.50, 80.35, 59.82, 53.43, 40.33, 28.25, 13.17, 10.39. HRMS (ESI-TOF)  $m/z$  calc'd for  $\text{C}_{22}\text{H}_{31}\text{ClN}_3\text{O}_3$   $[\text{M}+\text{H}]^+$ : 420.2048; found: 420.2058.

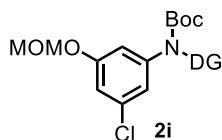

**tert-Butyl (3-chloro-5-(methoxymethoxy)phenyl)((4-methoxy-3,5-dimethylpyridin-2-yl)methyl)carbamate (2i)**

**L9** (10 mol%), 100 °C. Purification by preparative TLC chromatography (hexanes/EtOAc = 2:1 v/v) afforded 29.8 mg of compound **2i** as a yellow liquid (68% yield).  $R_f = 0.40$  (hexanes/EtOAc = 2:1 v/v).

$^1\text{H NMR}$  (600 MHz,  $\text{CDCl}_3$ )  $\delta$  8.17 (s, 1H), 6.95 (s, 1H), 6.88 (s, 1H), 6.82 (t,  $J = 1.8$  Hz, 1H), 5.08 (s, 2H), 4.85 (s, 2H), 3.73 (s, 3H), 3.42 (s, 3H), 2.21 (s, 3H), 2.19 (s, 3H), 1.39 (s, 9H);  $^{13}\text{C NMR}$  (150 MHz,  $\text{CDCl}_3$ )  $\delta$  163.67, 157.47, 154.55, 154.23, 149.04, 144.81, 133.92, 124.74, 123.45, 120.04, 113.60, 113.14, 94.50, 80.78, 59.86, 56.01, 53.22, 28.17, 13.20, 10.34. HRMS (ESI-TOF)  $m/z$  calc'd for  $\text{C}_{22}\text{H}_{30}\text{ClN}_2\text{O}_5$   $[\text{M}+\text{H}]^+$ : 437.1838; found: 437.1844.

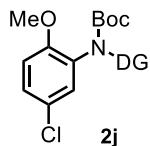

**tert-Butyl (5-chloro-2-methoxyphenyl)((4-methoxy-3,5-dimethylpyridin-2-yl)methyl)carbamate (2j)**

**L9** (10 mol%), 100 °C. Purification by preparative TLC chromatography (hexanes/EtOAc = 2:1 v/v) afforded 30.5 mg of compound **2j** as a colorless liquid (75% yield).  $R_f = 0.34$  (hexanes/EtOAc = 2:1 v/v).

$^1\text{H NMR}$  (600 MHz,  $\text{CDCl}_3$ , compound exists as a 71:29 mixture of rotamers)  $\delta$  8.17–8.00 (m, 1H), 7.19 (s, 0.29H), 7.09 (d,  $J = 8.0$  Hz, 1H), 6.91 (s, 0.71H), 6.84–6.66 (m, 1H), 5.43–4.20 (m, 2H), 3.76 (s, 3H), 3.72 (s, 3H), 2.23 (s, 3H), 2.20 (s, 3H), 1.47–1.32 (m, 9H);  $^{13}\text{C NMR}$  (150 MHz,  $\text{CDCl}_3$ , compound exists as a 71:29 mixture of rotamers)  $\delta$  163.80, 154.98, 154.90, 153.97, 148.78, 131.82, 130.46, 129.69, 127.78, 127.54, 125.08, 124.96, 124.80, 124.34, 112.62, 111.82, 80.43, 79.93, 59.79, 55.95, 55.52, 53.10, 52.27, 28.16, 13.17, 10.55. HRMS (ESI-TOF)  $m/z$  calc'd for  $\text{C}_{21}\text{H}_{28}\text{ClN}_2\text{O}_4$   $[\text{M}+\text{H}]^+$ : 407.1732; found: 407.1743.

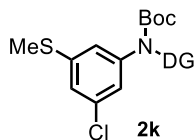

**tert-Butyl (3-chloro-5-(methylthio)phenyl)((4-methoxy-3,5-dimethylpyridin-2-yl)methyl)carbamate (2k)**

**L9** (10 mol%), 100 °C. Purification by preparative TLC chromatography (hexanes/EtOAc = 3:1 v/v) afforded 36.8 mg of compound **2k** as a yellow liquid (87% yield).  $R_f = 0.63$  (hexanes/EtOAc = 2:1 v/v).

$^1\text{H NMR}$  (600 MHz,  $\text{CDCl}_3$ )  $\delta$  8.17 (s, 1H), 7.08 (s, 2H), 6.96 (s, 1H), 4.84 (s, 2H), 3.73 (s, 3H), 2.40 (s, 3H), 2.22 (s, 3H), 2.19 (s, 3H), 1.39 (s, 9H);  $^{13}\text{C NMR}$  (150 MHz,  $\text{CDCl}_3$ )  $\delta$  163.69, 154.49, 154.19, 149.06, 144.34, 140.03, 133.92, 124.79, 123.44, 123.22, 122.93, 122.62, 80.84, 59.87, 53.14, 28.18, 15.66, 13.20, 10.35. HRMS (ESI-TOF)  $m/z$  calc'd for  $\text{C}_{21}\text{H}_{28}\text{ClN}_2\text{O}_3\text{S}$   $[\text{M}+\text{H}]^+$ : 423.1504; found: 423.1513.

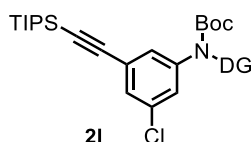

**tert-Butyl (3-chloro-5-((triisopropylsilyl)ethynyl)phenyl)((4-methoxy-3,5-dimethylpyridin-2-yl)methyl)carbamate (2l)**

**L9** (10 mol%), 100 °C. Purification by preparative TLC chromatography (hexanes/EtOAc = 5:1 v/v) afforded 41.5 mg of compound **2l** as a yellow liquid (79% yield).  $R_f = 0.80$  (hexanes/EtOAc = 2:1 v/v).

$^1\text{H NMR}$  (600 MHz,  $\text{CDCl}_3$ )  $\delta$  8.17 (s, 1H), 7.28 (s, 1H), 7.25 (s, 1H), 7.20 (t,  $J = 1.5$  Hz, 1H), 4.85 (s, 2H), 3.73 (s, 3H), 2.22 (s, 3H), 2.20 (s, 3H), 1.40 (s, 9H), 1.10 (s, 21H);  $^{13}\text{C NMR}$  (150 MHz,  $\text{CDCl}_3$ )  $\delta$  163.75, 154.38, 154.16, 149.07, 143.98, 133.44, 128.81, 128.20, 127.02, 124.85, 124.68, 123.54, 105.30, 92.04, 80.97, 59.87, 53.03, 28.16, 18.59, 13.19, 11.21, 10.38. HRMS (ESI-TOF)  $m/z$  calc'd for  $\text{C}_{31}\text{H}_{46}\text{ClN}_2\text{O}_3\text{Si}$   $[\text{M}+\text{H}]^+$ : 557.2961; found: 557.2976.

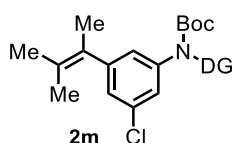

**tert-Butyl (3-chloro-5-(3-methylbut-2-en-2-yl)phenyl)((4-methoxy-3,5-dimethylpyridin-2-yl)methyl)carbamate (2m)**

**L9** (10 mol%), 100 °C. Purification by preparative TLC chromatography (hexanes/EtOAc = 4:1 v/v) afforded 35.5 mg of compound **2m** as a yellow liquid (80% yield).  $R_f = 0.58$  (hexanes/EtOAc = 2:1 v/v).

$^1\text{H NMR}$  (600 MHz,  $\text{CDCl}_3$ )  $\delta$  8.14 (s, 1H), 7.10 (s, 1H), 6.85 (s, 2H), 4.88 (s, 2H), 3.72 (s, 3H), 2.20 (s, 6H), 1.84 (s, 3H), 1.75 (s, 3H), 1.49 (s, 3H), 1.39 (s, 9H);  $^{13}\text{C NMR}$  (150 MHz,  $\text{CDCl}_3$ )  $\delta$  163.69, 154.72, 154.37, 149.01, 146.59, 143.41, 133.04, 128.59, 128.24, 125.64, 125.32, 124.74, 123.77, 80.55, 59.84, 53.31, 28.22, 22.00, 20.47, 20.43, 13.17, 10.40. HRMS (ESI-TOF)  $m/z$  calc'd for  $\text{C}_{25}\text{H}_{34}\text{ClN}_2\text{O}_3$   $[\text{M}+\text{H}]^+$ : 445.2252; found: 445.2270.

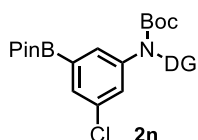

**tert-Butyl (3-chloro-5-(4,4,5,5-tetramethyl-1,3,2-dioxaborolan-2-yl)phenyl)((4-methoxy-3,5-dimethylpyridin-2-yl)methyl)carbamate (2n)**

**L9** (10 mol%), 100 °C. Purification by preparative TLC chromatography (hexanes/EtOAc = 2:1 v/v) afforded 26.8 mg of compound **2n** as a colorless solid (53% yield).  $R_f = 0.49$  (hexanes/EtOAc = 2:1 v/v).

$^1\text{H NMR}$  (600 MHz,  $\text{CDCl}_3$ )  $\delta$  8.15 (s, 1H), 7.52 (s, 1H), 7.52 (s, 1H), 7.37 (s, 1H), 4.88 (s, 2H), 3.72 (s, 3H), 2.20 (s, 3H), 1.39 (s, 9H), 1.31 (s, 12H);  $^{13}\text{C NMR}$  (150 MHz,  $\text{CDCl}_3$ )  $\delta$  163.72, 154.71, 154.40, 149.01, 145.79, 143.57, 133.40, 131.71, 130.74, 129.86, 124.75, 123.70, 120.18, 84.08, 80.63, 59.85, 53.19, 28.19, 24.82, 13.18, 10.45. HRMS (ESI-TOF)  $m/z$  calc'd for  $\text{C}_{26}\text{H}_{37}\text{BClN}_2\text{O}_5$   $[\text{M}+\text{H}]^+$ : 503.2479; found: 503.2500.

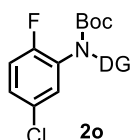

**tert-Butyl (5-chloro-2-fluorophenyl)((4-methoxy-3,5-dimethylpyridin-2-yl)methyl)carbamate (2o)**

**L11** (10 mol%), 110 °C. Purification by preparative TLC chromatography (hexanes/EtOAc = 3:1 v/v) afforded 24.5 mg of compound **2o** as a yellow liquid (62% yield).  $R_f = 0.62$  (hexanes/EtOAc = 2:1 v/v).

$^1\text{H}$  NMR (600 MHz,  $\text{CDCl}_3$ )  $\delta$  8.12 (s, 1H), 7.24 (brs, 1H), 7.13–7.05 (m, 1H), 6.93 (t,  $J = 9.3$  Hz, 1H), 4.87 (s, 2H), 3.73 (s, 3H), 2.23 (s, 3H), 2.21 (s, 3H), 1.39 (s, 9H);  $^{13}\text{C}$  NMR (150 MHz,  $\text{CDCl}_3$ )  $\delta$  163.84, 156.83 (d,  $J = 249.2$  Hz), 154.27, 153.92, 148.93, 131.17 (d,  $J = 14.3$  Hz), 129.42, 128.41, 127.76 (d,  $J = 8.0$  Hz), 125.10, 124.73, 116.57 (d,  $J = 19.5$  Hz), 80.97, 59.83, 52.60, 28.05, 13.20, 10.46;  $^{19}\text{F}$  NMR (376 MHz,  $\text{CDCl}_3$ )  $\delta$  -122.93. HRMS (ESI-TOF)  $m/z$  calc'd for  $\text{C}_{20}\text{H}_{25}\text{ClFN}_2\text{O}_3$   $[\text{M}+\text{H}]^+$ : 395.1532; found: 395.1547.

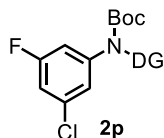

**tert-Butyl (5-chloro-3-fluorophenyl)((4-methoxy-3,5-dimethylpyridin-2-yl)methyl)carbamate (2p)**

**L9** (10 mol%), 110 °C. Purification by preparative TLC chromatography (hexanes/EtOAc = 7:2 v/v) afforded 33.1 mg of compound **2p** as a yellow liquid (84% yield).  $R_f = 0.75$  (hexanes/EtOAc = 2:1 v/v).

$^1\text{H}$  NMR (600 MHz,  $\text{CDCl}_3$ )  $\delta$  8.18 (s, 1H), 7.13 (s, 1H), 6.99 (dt,  $J = 10.3, 2.2$  Hz, 1H), 6.84 (dt,  $J = 8.3, 2.1$  Hz, 1H), 4.84 (s, 2H), 3.75 (s, 3H), 2.23 (s, 3H), 2.20 (s, 3H), 1.39 (s, 9H);  $^{13}\text{C}$  NMR (150 MHz,  $\text{CDCl}_3$ )  $\delta$  163.73, 162.14 (d,  $J = 247.6$  Hz), 154.20, 153.98, 149.15, 145.40 (d,  $J = 11.2$  Hz), 134.11 (d,  $J = 12.2$  Hz), 124.88, 123.30, 122.09, 112.97 (d,  $J = 24.9$  Hz), 112.02 (d,  $J = 23.5$  Hz), 81.18, 59.91, 53.06, 28.13, 13.23, 10.31;  $^{19}\text{F}$  NMR (376 MHz,  $\text{CDCl}_3$ )  $\delta$  -111.82. HRMS (ESI-TOF)  $m/z$  calc'd for  $\text{C}_{20}\text{H}_{25}\text{ClFN}_2\text{O}_3$   $[\text{M}+\text{H}]^+$ : 395.1532; found: 395.1546.

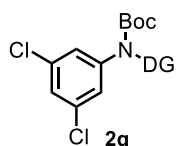

**tert-Butyl (3,5-dichlorophenyl)((4-methoxy-3,5-dimethylpyridin-2-yl)methyl)carbamate (2q)**

**L11** (10 mol%), 110 °C. Purification by preparative TLC chromatography (hexanes/EtOAc = 4:1 v/v) afforded 33.7 mg of compound **2q** as a yellow liquid (82% yield).  $R_f = 0.61$  (hexanes/EtOAc = 3:1 v/v).

$^1\text{H}$  NMR (600 MHz,  $\text{CDCl}_3$ )  $\delta$  8.18 (s, 1H), 7.24 (s, 2H), 7.10 (t,  $J = 1.8$  Hz, 1H), 4.83 (s, 2H), 3.75 (s, 3H), 2.23 (s, 3H), 2.20 (s, 3H), 1.38 (s, 9H);  $^{13}\text{C}$  NMR (150 MHz,  $\text{CDCl}_3$ )  $\delta$  163.72, 154.17, 153.95, 149.15, 145.09, 134.13, 125.32, 124.89, 124.73, 123.29, 81.18, 59.90, 53.01, 28.11, 13.22, 10.32. HRMS (ESI-TOF)  $m/z$  calc'd for  $\text{C}_{20}\text{H}_{25}\text{Cl}_2\text{N}_2\text{O}_3$   $[\text{M}+\text{H}]^+$ : 411.1237; found: 411.1249.

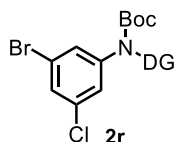

**tert-Butyl (3-bromo-5-chlorophenyl)((4-methoxy-3,5-dimethylpyridin-2-yl)methyl)carbamate (2r)**

**L11** (10 mol%), 110 °C. Purification by preparative TLC chromatography (hexanes/EtOAc = 4:1 v/v) afforded 36.0 mg of compound **2r** as a colorless liquid (79% yield).  $R_f = 0.73$  (hexanes/EtOAc = 2:1 v/v).

$^1\text{H}$  NMR (600 MHz,  $\text{CDCl}_3$ )  $\delta$  8.18 (s, 1H), 7.39 (s, 1H), 7.28 (s, 1H), 7.25 (s, 1H), 4.83 (s, 2H), 3.74 (s, 3H), 2.23 (s, 3H), 2.20 (s, 3H), 1.38 (s, 9H);  $^{13}\text{C}$  NMR (150 MHz,  $\text{CDCl}_3$ )  $\delta$  163.74, 154.15, 153.94, 149.15, 145.20, 134.31, 128.07, 127.59, 125.22, 124.91, 123.33, 121.64, 81.21, 59.91, 53.00, 28.12, 13.23, 10.32. HRMS (ESI-TOF)  $m/z$  calc'd for  $\text{C}_{20}\text{H}_{25}\text{BrClN}_2\text{O}_3$   $[\text{M}+\text{H}]^+$ : 455.0732; found: 455.0744.

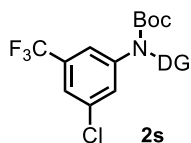

**tert-Butyl (3-chloro-5-(trifluoromethyl)phenyl)((4-methoxy-3,5-dimethylpyridin-2-yl)methyl)carbamate (2s)**



**L11** (15 mol%), 110 °C. Purification by preparative TLC chromatography (hexanes/EtOAc = 5:1 v/v) afforded 34.5 mg of compound **2s** as a yellow liquid (80% yield).  $R_f$  = 0.81 (hexanes/EtOAc = 2:1 v/v).

$^1\text{H}$  NMR (600 MHz,  $\text{CDCl}_3$ )  $\delta$  8.17 (s, 1H), 7.53 (s, 1H), 7.50 (s, 1H), 7.34 (s, 1H), 4.87 (s, 2H), 3.74 (s, 3H), 2.23 (s, 3H), 2.21 (s, 3H), 1.39 (s, 9H);  $^{13}\text{C}$  NMR (150 MHz,  $\text{CDCl}_3$ )  $\delta$  163.79, 154.04, 153.88, 149.18, 144.94, 134.32, 131.64 (q,  $J$  = 32.8 Hz), 129.26, 125.00, 123.37, 123.15 (q,  $J$  = 272.9 Hz), 122.01 (q,  $J$  = 3.5 Hz), 121.62, 81.42, 59.90, 52.88, 28.09, 13.22, 10.33;  $^{19}\text{F}$  NMR (376 MHz,  $\text{CDCl}_3$ )  $\delta$  -63.14. HRMS (ESI-TOF)  $m/z$  calc'd for  $\text{C}_{21}\text{H}_{25}\text{ClF}_3\text{N}_2\text{O}_3$   $[\text{M}+\text{H}]^+$ : 445.1500; found: 445.1515.

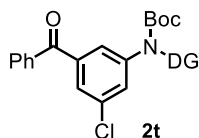

**tert-Butyl (3-benzoyl-5-chlorophenyl)((4-methoxy-3,5-dimethylpyridin-2-yl)methyl)carbamate (**2t**)**

**L11** (10 mol%), 100 °C. Purification by preparative TLC chromatography (hexanes/EtOAc = 3:1 v/v) afforded 35.0 mg of compound **2t** as a yellow liquid (73% yield).  $R_f$  = 0.53 (hexanes/EtOAc = 2:1 v/v).  $^1\text{H}$  NMR (600 MHz,  $\text{CDCl}_3$ )  $\delta$  8.15 (s, 1H), 7.75 (d,  $J$  = 7.4 Hz, 2H), 7.65–7.53 (m, 3H), 7.50 (t,  $J$  = 1.7 Hz, 1H), 7.46 (t,  $J$  = 7.7 Hz, 2H), 4.89 (s, 2H), 3.73 (s, 3H), 2.22 (s, 3H), 2.20 (s, 3H), 1.39 (s, 9H);  $^{13}\text{C}$  NMR (150 MHz,  $\text{CDCl}_3$ )  $\delta$  194.73, 163.76, 154.21, 154.13, 149.07, 144.31, 138.76, 136.74, 133.85, 132.72, 130.16, 130.00, 128.34, 126.62, 125.91, 124.89, 123.43, 81.16, 59.89, 52.94, 28.14, 13.21, 10.34.  $R_f$  = 0.53 (hexanes/EtOAc = 2:1 v/v). HRMS (ESI-TOF)  $m/z$  calc'd for  $\text{C}_{27}\text{H}_{30}\text{ClN}_2\text{O}_4$   $[\text{M}+\text{H}]^+$ : 481.1889; found: 481.1899.

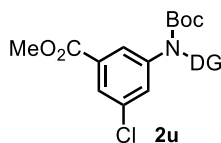

**Methyl 3-((tert-butoxycarbonyl)((4-methoxy-3,5-dimethylpyridin-2-yl)methyl)amino)-5-chlorobenzoate (**2u**)**

**L11** (15 mol%), 110 °C. Purification by preparative TLC chromatography (hexanes/EtOAc = 2:1 v/v) afforded 30.8 mg of compound **2u** as a yellow liquid (71% yield).  $R_f$  = 0.47 (hexanes/EtOAc = 2:1 v/v).

$^1\text{H}$  NMR (600 MHz,  $\text{CDCl}_3$ )  $\delta$  8.16 (s, 1H), 7.85 (s, 1H), 7.76 (t,  $J$  = 1.7 Hz, 1H), 7.54 (s, 1H), 4.88 (s, 2H), 3.88 (s, 3H), 3.74 (s, 3H), 2.22 (s, 3H), 2.21 (s, 3H), 1.39 (s, 9H);  $^{13}\text{C}$  NMR (150 MHz,  $\text{CDCl}_3$ )  $\delta$  165.63, 163.75, 154.26, 154.10, 149.14, 144.43, 133.88, 131.48, 130.81, 126.39, 125.69, 124.89, 123.45, 81.13, 59.90, 52.96, 52.38, 28.14, 13.22, 10.37. HRMS (ESI-TOF)  $m/z$  calc'd for  $\text{C}_{22}\text{H}_{28}\text{ClN}_2\text{O}_5$   $[\text{M}+\text{H}]^+$ : 435.1681; found: 435.1696.

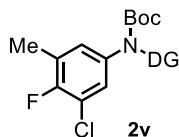

**tert-Butyl (3-chloro-4-fluoro-5-methylphenyl)((4-methoxy-3,5-dimethylpyridin-2-yl)methyl)carbamate (**2v**)**

**L11** (10 mol%), 110 °C. Purification by preparative TLC chromatography (hexanes/EtOAc = 3:1 v/v) afforded 33.0 mg of compound **2v** as a yellow liquid (81% yield).  $R_f$  = 0.49 (hexanes/EtOAc = 3:1 v/v).

$^1\text{H}$  NMR (600 MHz,  $\text{CDCl}_3$ )  $\delta$  8.16 (s, 1H), 7.15 (s, 1H), 7.02 (s, 1H), 4.82 (s, 2H), 3.74 (s, 3H), 2.24–2.21 (m, 6H), 2.20 (s, 3H), 1.38 (s, 9H);  $^{13}\text{C}$  NMR (150 MHz,  $\text{CDCl}_3$ )  $\delta$  155.28, 154.50, 153.65, 149.01, 138.65, 127.97, 127.94, 126.32, 125.88 (q,  $J$  = 18 Hz), 124.82, 119.92 (q,  $J$  = 18 Hz), 80.68, 59.87, 53.38, 28.18, 14.86 (q,  $J$  = 3.0 Hz), 13.21, 10.37;  $^{19}\text{F}$  NMR (376 MHz,  $\text{CDCl}_3$ )  $\delta$  -123.23. HRMS (ESI-TOF)  $m/z$  calc'd for  $\text{C}_{21}\text{H}_{27}\text{ClFN}_2\text{O}_3$   $[\text{M}+\text{H}]^+$ : 409.1689; found: 409.1704.

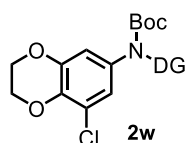

**tert-Butyl (8-chloro-2,3-dihydrobenzo[b][1,4]dioxin-6-yl)((4-methoxy-3,5-dimethylpyridin-2-yl)methyl)carbamate (2w)**

**L11** (10 mol%), 110 °C. Purification by preparative TLC chromatography (hexanes/EtOAc = 2:1 v/v) afforded 30.9 mg of compound **2w** as a yellow liquid (71% yield).  $R_f$  = 0.39 (hexanes/EtOAc = 2:1 v/v).  $^1\text{H}$  NMR (600 MHz,  $\text{CDCl}_3$ )  $\delta$  8.16 (s, 1H), 6.88 (s, 1H), 6.76 (s, 1H), 4.80 (s, 2H), 4.36 – 4.25 (m, 2H), 4.25 – 4.14 (m, 2H), 3.73 (s, 3H), 2.21 (s, 3H), 2.18 (s, 3H), 1.38 (s, 9H);  $^{13}\text{C}$  NMR (150 MHz,  $\text{CDCl}_3$ )  $\delta$  163.66, 154.65, 149.00, 143.66, 137.95, 136.05, 124.70, 123.57, 121.01, 120.77, 114.64, 80.46, 64.74, 64.07, 59.85, 53.49, 28.20, 13.19, 10.34. HRMS (ESI-TOF)  $m/z$  calc'd for  $\text{C}_{22}\text{H}_{28}\text{ClN}_2\text{O}_5$   $[\text{M}+\text{H}]^+$ : 435.1681; found: 435.1696.

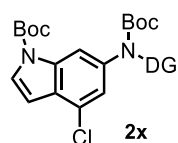

**tert-Butyl 6-((tert-butoxycarbonyl)((4-methoxy-3,5-dimethylpyridin-2-yl)methyl)amino)-4-chloro-1H-indole-1-carboxylate (2x)**

**L11** (10 mol%), 110 °C. Purification by preparative TLC chromatography (hexanes/EtOAc = 3:1 v/v) afforded 42.8 mg of compound **2x** as a yellow liquid (72% yield).  $R_f$  = 0.56 (hexanes/EtOAc = 2:1 v/v).  $^1\text{H}$  NMR (600 MHz,  $\text{CDCl}_3$ )  $\delta$  8.14 (s, 1H), 7.92 (s, 1H), 7.56 (d,  $J$  = 3.7 Hz, 1H), 7.21 (s, 1H), 6.59 (d,  $J$  = 3.7 Hz, 1H), 4.94 (s, 2H), 3.73 (s, 3H), 2.22 (s, 3H), 2.20 (s, 3H), 1.59 (s, 9H), 1.40 (s, 9H);  $^{13}\text{C}$  NMR (150 MHz,  $\text{CDCl}_3$ )  $\delta$  163.71, 154.86, 154.74, 149.22, 148.99, 140.02, 135.26, 127.19, 126.65, 124.98, 124.73, 123.78, 122.25, 112.56, 105.09, 84.06, 80.46, 59.82, 53.96, 28.23, 28.00, 13.16, 10.44. HRMS (ESI-TOF)  $m/z$  calc'd for  $\text{C}_{27}\text{H}_{35}\text{ClN}_3\text{O}_5$   $[\text{M}+\text{H}]^+$ : 516.2260; found: 516.2273.

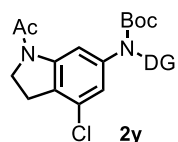

**tert-Butyl 2-(1-acetyl-4-chloroindolin-6-yl)-3-(4-methoxy-3,5-dimethylpyridin-2-yl)propanoate (2y)**

**L11** (10 mol%), 110 °C. Purification by preparative TLC chromatography (hexanes/EtOAc = 1:2 v/v) afforded 32.9 mg of compound **2y** as a yellow liquid (72% yield).  $R_f$  = 0.19 (hexanes/EtOAc = 1:1 v/v).  $^1\text{H}$  NMR (600 MHz,  $\text{CDCl}_3$ , compound exists as a 84:16 mixture of rotamers)  $\delta$  8.15 (s, 1H), 8.05 (s, 0.84H), 7.13 (s, 0.16H), 7.06 – 6.89 (m, 1H), 4.85 (s, 2H), 4.15 – 3.98 (m, 2H), 3.72 (s, 3H), 3.11 (t,  $J$  = 8.5 Hz, 1.70H), 2.99 (t,  $J$  = 8.3 Hz, 0.28H), 2.31–2.12 (m, 9H), 1.39 (s, 9H);  $^{13}\text{C}$  NMR (150 MHz,  $\text{CDCl}_3$ , compound exists as a 84:16 mixture of rotamers)  $\delta$  168.62, 168.29, 163.67, 154.74, 154.48, 148.94, 143.75, 143.71, 129.19, 126.81, 124.66, 123.67, 122.13, 121.46, 114.22, 112.09, 80.59, 59.84, 53.39, 48.86, 47.95, 28.19, 27.06, 24.12, 13.19, 10.41. HRMS (ESI-TOF)  $m/z$  calc'd for  $\text{C}_{24}\text{H}_{31}\text{ClN}_3\text{O}_4$   $[\text{M}+\text{H}]^+$ : 460.1998; found: 460.2007.

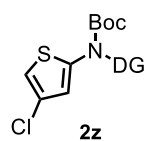

**tert-Butyl 2-(4-chlorothiophen-2-yl)-3-(4-methoxy-3,5-dimethylpyridin-2-yl)propanoate (2z)**

**L11** (10 mol%), 110 °C. Purification by preparative TLC chromatography (hexanes/EtOAc = 5:1 v/v)

afforded 24.1 mg of compound **2z** as a yellow solid (63% yield).  $R_f = 0.71$  (hexanes/EtOAc = 2:1 v/v).

$^1\text{H NMR}$  (600 MHz,  $\text{CDCl}_3$ )  $\delta$  8.17 (s, 1H), 6.98 (s, 1H), 6.68 (s, 1H), 4.84 (s, 2H), 3.74 (s, 3H), 2.22 (s, 3H), 2.19 (s, 3H), 1.43 (s, 9H);  $^{13}\text{C NMR}$  (150 MHz,  $\text{CDCl}_3$ )  $\delta$  163.75, 154.43, 154.01, 149.10, 139.87, 127.89, 124.86, 124.78, 123.52, 113.34, 81.09, 59.92, 52.99, 28.22, 13.24, 10.30. HRMS (ESI-TOF)  $m/z$  calc'd for  $\text{C}_{18}\text{H}_{24}\text{ClN}_2\text{O}_3\text{S}$   $[\text{M}+\text{H}]^+$ : 383.1191; found: 383.1205.

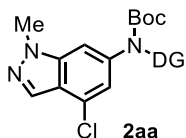

### ***tert*-Butyl 2-(4-chloro-1-methyl-1H-indazol-6-yl)-3-(4-methoxy-3,5-dimethylpyridin-2-yl)propanoate (2aa)**

**L11** (10 mol%), 110 °C. Purification by preparative TLC chromatography (hexanes/EtOAc = 2:3 v/v) afforded 32.0 mg of compound **2aa** as a yellow solid (74% yield).  $R_f = 0.27$  (hexanes/EtOAc = 1:1 v/v).

$^1\text{H NMR}$  (600 MHz,  $\text{CDCl}_3$ )  $\delta$  8.17 (s, 1H), 7.94 (d,  $J = 0.9$  Hz, 1H), 7.29 (s, 1H), 7.11 (s, 1H), 4.94 (s, 2H), 3.98 (s, 3H), 3.73 (s, 3H), 2.23 (s, 3H), 2.22 (s, 3H), 1.39 (s, 9H);  $^{13}\text{C NMR}$  (150 MHz,  $\text{CDCl}_3$ )  $\delta$  163.78, 154.64, 154.52, 148.99, 142.04, 140.49, 131.24, 125.57, 124.91, 123.71, 121.27, 120.51, 105.36, 80.89, 59.88, 53.74, 35.86, 28.20, 13.22, 10.44. HRMS (ESI-TOF)  $m/z$  calc'd for  $\text{C}_{22}\text{H}_{28}\text{ClN}_4\text{O}_3$   $[\text{M}+\text{H}]^+$ : 431.1844; found: 431.1853.

### **3.7 *meta*-C–H Dichlorination of Aniline 1ab**

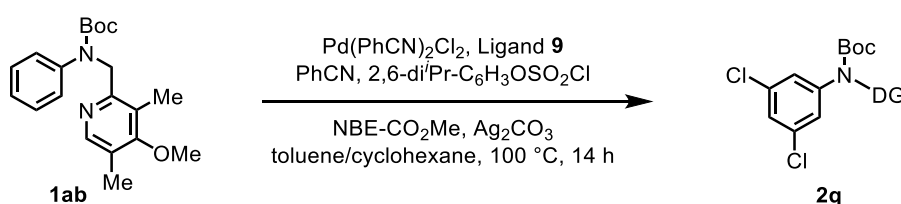

### ***tert*-Butyl (3,5-dichlorophenyl)((4-methoxy-3,5-dimethylpyridin-2-yl)methyl)carbamate (2q)**

Arene **1ab** (34.2 mg, 0.10 mmol, 1.0 equiv),  $\text{Pd}(\text{PhCN})_2\text{Cl}_2$  (3.8 mg, 10  $\mu\text{mol}$ , 10 mol%), Ligand **9** (3.9 mg, 11  $\mu\text{mol}$ , 10 mol%) and  $\text{Ag}_2\text{CO}_3$  (55 mg, 0.20 mmol, 2.0 equiv.) were added into a flame-dried Schlenk tube. The Schlenk tube was evacuated and back-filled with nitrogen. Toluene (1 mL), cyclohexane (1 mL), PhCN (2  $\mu\text{L}$ , 20  $\mu\text{mol}$ , 20 mol%), NBE- $\text{CO}_2\text{Me}$  (23  $\mu\text{L}$ , 0.15 mmol, 1.5 equiv.) and 2,6-di'Pr- $\text{C}_6\text{H}_3\text{OSO}_2\text{Cl}$  (69 mg, 0.25 mmol, 2.5 equiv.) were added to the mixture. The Schlenk tube was immersed into a pre-heated oil bath at 100 °C. After 14 hours, the oil bath was removed, and the Schlenk tube was allowed to cool to room temperature. The reaction mixture was filtered through Celite and eluted with EtOAc (3  $\times$  2 mL). The filtrate was evaporated under reduced pressure. Purification by preparative TLC chromatography (hexanes/EtOAc = 4:1 v/v) afforded 31.8 mg of compound **2q** as a yellow liquid (77% yield).  $R_f = 0.61$  (hexanes/EtOAc = 3/1 v/v).

### **3.8 *meta*-C–H Chlorination of Phenol 3**

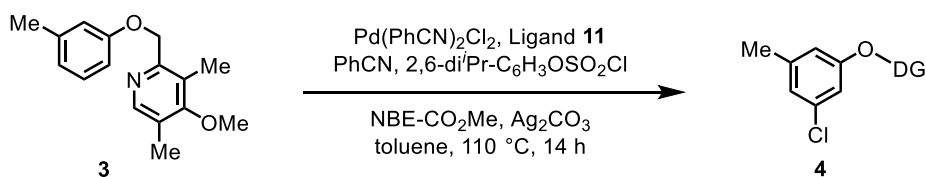

### **2-((3-Chloro-5-methylphenoxy)methyl)-4-methoxy-3,5-dimethylpyridine (4)**

Arene **3** (25.7 mg, 0.10 mmol, 1.0 equiv),  $\text{Pd}(\text{PhCN})_2\text{Cl}_2$  (3.8 mg, 10  $\mu\text{mol}$ , 10 mol%), Ligand **11** (3.5 mg, 11  $\mu\text{mol}$ , 10 mol%) and  $\text{Ag}_2\text{CO}_3$  (55 mg, 0.20 mmol, 2.0 equiv.) were added into a flame-dried Schlenk tube. The

Schlenk tube was evacuated and back-filled with nitrogen. Toluene (2 mL), PhCN (2  $\mu$ L, 20  $\mu$ mol, 20 mol%), NBE-CO<sub>2</sub>Me (23  $\mu$ L, 0.15 mmol, 1.5 equiv.) and 2,6-di<sup>t</sup>Pr-C<sub>6</sub>H<sub>4</sub>OSO<sub>2</sub>Cl (69 mg, 0.25 mmol, 2.5 equiv.) were added to the mixture. The Schlenk tube was immersed into a pre-heated oil bath at 110 °C. After 14 hours, the oil bath was removed, and the Schlenk tube was allowed to cool to room temperature. The reaction mixture was filtered through Celite and eluted with EtOAc (3  $\times$  2 mL). The filtrate was evaporated under reduced pressure. Purification by preparative TLC chromatography (toluene/EtOAc = 10:1 v/v) afforded 17.5 mg of compound **4** as a yellow liquid (60% yield). *R*<sub>f</sub> = 0.41 (toluene/EtOAc = 10:1 v/v).

<sup>1</sup>H NMR (600 MHz, CDCl<sub>3</sub>)  $\delta$  8.17 (s, 1H), 7.08 (s, 1H), 6.99 (s, 1H), 6.91 (s, 1H), 4.85 (s, 2H), 3.73 (s, 3H), 2.25 (s, 3H), 2.21 (s, 3H), 2.19 (s, 3H), 1.38 (s, 9H); <sup>13</sup>C NMR (151 MHz, CDCl<sub>3</sub>)  $\delta$  163.63, 154.69, 154.35, 148.99, 143.88, 139.40, 133.19, 126.19, 125.13, 124.68, 123.62, 123.44, 80.55, 59.83, 53.25, 28.14, 21.14, 13.17, 10.32. HRMS (ESI-TOF) *m/z* calc'd for C<sub>16</sub>H<sub>19</sub>ClNO<sub>2</sub> [M+H]<sup>+</sup>: 292.1099; found: 292.1096.

### 3.9 Gram-Scale *meta*-C–H Chlorination of Aniline **1a**

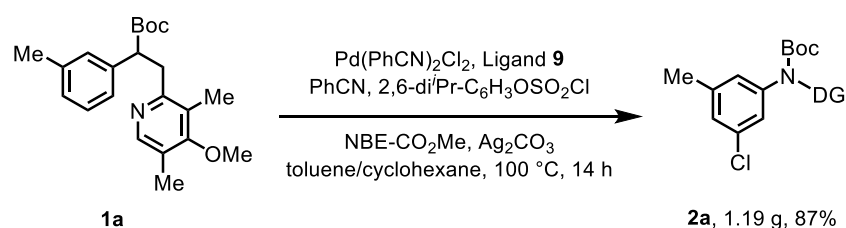

#### *tert*-Butyl (3-chloro-5-methylphenyl)((4-methoxy-3,5-dimethylpyridin-2-yl)methyl)carbamate (**2a**)

Arene **1a** (1.25 g, 3.5 mmol, 1.0 equiv), Pd(PhCN)<sub>2</sub>Cl<sub>2</sub> (134 mg, 0.35 mmol, 10 mol%), Ligand **9** (136 mg, 0.35  $\mu$ mol, 10 mol%) and Ag<sub>2</sub>CO<sub>3</sub> (818 mg, 4.9 mmol, 1.4 equiv.) were added into a flame-dried Schlenk tube. The Schlenk tube was evacuated and back-filled with nitrogen. Toluene (35 mL), PhCN (72.1  $\mu$ L, 0.7 mmol, 20 mol%), NBE-CO<sub>2</sub>Me (532 mg, 3.5 mmol, 1 equiv.), 2,6-di<sup>t</sup>Pr-C<sub>6</sub>H<sub>4</sub>OSO<sub>2</sub>Cl (1.94 g, 7 mmol, 2 equiv.) and cyclohexane (35 mL) were added to the mixture. The Schlenk tube was immersed into a pre-heated oil bath at 100 °C. After 14 hours, the oil bath was removed, and the Schlenk tube was allowed to cool to room temperature. The reaction mixture was filtered through Celite and eluted with EtOAc (3  $\times$  30 mL). The filtrate was evaporated under reduced pressure. Purification by silica gel chromatography (Hexane/EtOAc = 6:1 v/v to 3:1 v/v) afforded 1.19 g of compound **2a** as a yellow liquid (87% yield).

### 3.10 Diversification of *meta*-Chloro Aniline **2a**

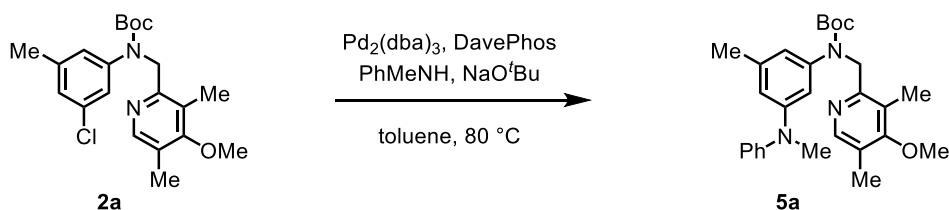

#### *tert*-Butyl ((4-methoxy-3,5-dimethylpyridin-2-yl)methyl)(3-methyl-5-(methyl(phenyl)amino)phenyl)carbamate (**5a**)

Arene **2a** (39.0 mg, 0.1 mmol, 1 equiv.), Pd<sub>2</sub>(dba)<sub>3</sub> (2.7 mg, 3  $\mu$ mol, 3 mol%), Davephos (3.5 mg, 9  $\mu$ mol, 9 mol%), and NaO<sup>t</sup>Bu (13.4 mg, 0.14 mmol, 1.4 equiv.) were added to a flame-dried Schlenk tube. The Schlenk tube was evacuated and back-filled with nitrogen. Toluene (0.4 mL) and *N*-methylaniline (16  $\mu$ L, 0.15 mmol, 1.5 equiv.) were added to the mixture. The Schlenk tube was immersed into a pre-heated oil bath at 80 °C. After 18 h, the oil bath was removed, and the Schlenk tube was allowed to cool to room temperature. The reaction mixture was filtered through Celite and eluted with EtOAc (3  $\times$  2 mL). The filtrate was evaporated

under reduced pressure. Purification by preparative TLC chromatography (hexane/EtOAc = 2:1 v/v) afforded 39.8 mg of compound **5a** as a yellow liquid (86% yield).  $R_f = 0.33$  (hexanes/EtOAc = 2:1 v/v).

$^1\text{H}$  NMR (600 MHz,  $\text{CDCl}_3$ )  $\delta$  8.14 (s, 1H), 7.21 (t,  $J = 7.8$  Hz, 2H), 6.92–6.82 (m, 3H), 6.70 (d,  $J = 7.8$  Hz, 2H), 6.61 (s, 1H), 4.88 (s, 2H), 3.70 (s, 3H), 3.21 (s, 3H), 2.21 (s, 6H), 2.19 (s, 3H), 1.40 (s, 9H);  $^{13}\text{C}$  NMR (150 MHz,  $\text{CDCl}_3$ )  $\delta$  163.66, 155.16, 154.71, 148.96, 148.84, 148.65, 143.41, 138.84, 126.96, 124.57, 123.80, 120.62, 120.49, 119.48, 119.38, 117.24, 80.14, 59.79, 53.55, 40.13, 28.27, 21.50, 13.20, 10.42. HRMS (ESI-TOF)  $m/z$  calc'd for  $\text{C}_{28}\text{H}_{36}\text{N}_3\text{O}_3$   $[\text{M}+\text{H}]^+$ : 462.2751; found: 462.2749.

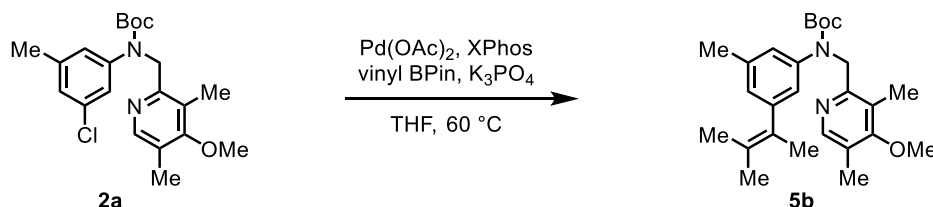

***tert*-Butyl ((4-methoxy-3,5-dimethylpyridin-2-yl)methyl)(3-methyl-5-(3-methylbut-2-en-2-yl)phenyl)carbamate (**5b**).**

Arene **2a** (39.0 mg, 0.1 mmol, 1 equiv.),  $\text{Pd}(\text{OAc})_2$  (0.9 mg, 4  $\mu\text{mol}$ , 4 mol%), XPhos (3.8 mg, 8  $\mu\text{mol}$ , 8 mol%), and  $\text{K}_3\text{PO}_4$  aqueous solution (0.5 M, 600  $\mu\text{L}$ , 0.3 mmol, 3 equiv.) were added to a flame-dried Schlenk tube. The Schlenk tube was evacuated and back-filled with nitrogen. THF (1 mL) and 4,4,5,5-tetramethyl-2-(3-methylbut-2-en-2-yl)-1,3,2-dioxaborolane (44  $\mu\text{L}$ , 0.2 mmol, 2 equiv.) were added to the mixture. The Schlenk tube was immersed into a pre-heated oil bath at 60  $^\circ\text{C}$ . After 4 h, the oil bath was removed, and the Schlenk tube was allowed to cool to room temperature. Water (3 mL) was added into the Schlenk. The reaction mixture was extracted with EtOAc ( $3 \times 3$  mL). The combined organic layers were dried with  $\text{Na}_2\text{SO}_4$ . After the organic solvent was concentrated by rotatory evaporation, the residue was purified by preparative TLC chromatography (hexane/EtOAc = 3:1 v/v) to afford 37.2 mg of compound **5b** as a yellow liquid (88% yield).  $R_f = 0.48$  (hexanes/EtOAc = 3:1 v/v).

$^1\text{H}$  NMR (600 MHz,  $\text{CDCl}_3$ )  $\delta$  8.11 (s, 1H), 6.86 (s, 1H), 6.68–6.65 (m, 2H), 4.91 (s, 2H), 3.71 (s, 3H), 2.24 (s, 3H), 2.20 (s, 3H), 2.19 (s, 3H), 1.83 (s, 3H), 1.74 (s, 3H), 1.46 (s, 3H), 1.39 (s, 9H);  $^{13}\text{C}$  NMR (150 MHz,  $\text{CDCl}_3$ )  $\delta$  163.64, 155.27, 154.79, 148.83, 145.14, 141.95, 137.55, 129.69, 126.90, 126.45, 124.59, 124.22, 80.03, 59.77, 53.59, 28.28, 21.99, 21.33, 20.64, 20.39, 13.18, 10.46. HRMS (ESI-TOF)  $m/z$  calc'd for  $\text{C}_{26}\text{H}_{37}\text{N}_2\text{O}_3$   $[\text{M}+\text{H}]^+$ : 425.2799; found: 425.2796.

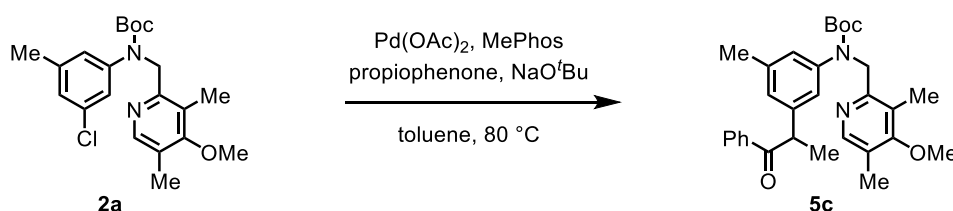

***tert*-Butyl ((4-methoxy-3,5-dimethylpyridin-2-yl)methyl)(3-methyl-5-(1-oxo-1-phenylpropan-2-yl)phenyl)carbamate (**5c**).**

Arene **2a** (39.0 mg, 0.1 mmol, 1 equiv.),  $\text{Pd}(\text{OAc})_2$  (1.1 mg, 5  $\mu\text{mol}$ , 5 mol%), MePhos (3.6 mg, 10  $\mu\text{mol}$ , 10 mol%), and  $\text{NaO}^t\text{Bu}$  (12.4 mg, 0.13 mmol, 1.3 equiv.) were added to a flame-dried Schlenk tube. The Schlenk tube was evacuated and back-filled with nitrogen. Toluene (0.2 mL) and propiophenone (16  $\mu\text{L}$ , 0.12 mmol, 1.2 equiv.) were added to the mixture. The Schlenk tube was immersed into a pre-heated oil bath at 80  $^\circ\text{C}$ . After 18 h, the oil bath was removed, and the Schlenk tube was allowed to cool to room temperature. The reaction mixture was filtered through Celite and eluted with EtOAc ( $3 \times 2$  mL). The filtrate was evaporated under reduced pressure. Purification by preparative TLC chromatography (hexane/EtOAc = 2:1 v/v) afforded 37.1 mg of compound **5c** as a yellow liquid (76% yield).  $R_f = 0.40$  (hexanes/EtOAc = 2:1 v/v).

$^1\text{H}$  NMR (600 MHz,  $\text{CDCl}_3$ )  $\delta$  8.07 (s, 1H), 7.89 (d,  $J = 7.8$  Hz, 2H), 7.45 (t,  $J = 7.8$  Hz, 1H), 7.43 (t,  $J = 7.8$  Hz, 2H), 6.93 (s, 1H), 6.88 (s, 1H), 6.82 (s, 1H), 4.85 (s, 2H), 4.54 (q,  $J = 6.6$  Hz, 1H), 3.70 (s, 3H), 2.21 (s, 3H), 2.18 (s, 3H), 2.16 (s, 3H), 1.42 (d,  $J = 6.6$  Hz, 3H), 1.34 (s, 9H);  $^{13}\text{C}$  NMR (150 MHz,  $\text{CDCl}_3$ )  $\delta$  200.06, 163.62, 155.00, 154.55, 148.80, 143.07, 141.14, 138.79, 136.46, 132.61, 128.72, 128.33, 125.46, 124.95, 124.57, 123.72, 123.42, 80.2, 59.79, 53.37, 47.70, 28.18, 21.33, 19.44, 13.17, 10.36. HRMS (ESI-TOF)  $m/z$  calc'd for  $\text{C}_{30}\text{H}_{37}\text{N}_2\text{O}_4$   $[\text{M}+\text{H}]^+$ : 489.2748; found: 489.2739.

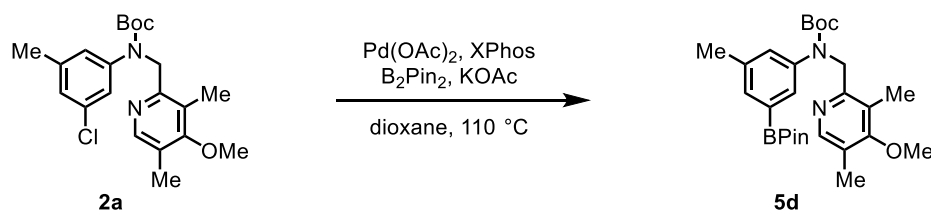

***tert*-Butyl ((4-methoxy-3,5-dimethylpyridin-2-yl)methyl)(3-methyl-5-(4,4,5,5-tetramethyl-1,3,2-dioxaborolan-2-yl)phenyl)carbamate (5d)**

Arene **2a** (39.0 mg, 0.1 mmol, 1 equiv.),  $\text{Pd}(\text{OAc})_2$  (1.1 mg, 5  $\mu\text{mol}$ , 5 mol%), XPhos (4.8 mg, 10  $\mu\text{mol}$ , 10 mol%), KOAc (29.4 mg, 0.3 mmol, 3 equiv.), and  $\text{B}_2\text{Pin}_2$  (50.7 mg, 0.2 mmol, 2 equiv.) were added to a flame-dried Schlenk tube. The Schlenk tube was evacuated and back-filled with nitrogen. Dioxane (0.4 mL) was added to the mixture. The Schlenk tube was immersed into a pre-heated oil bath at 110  $^\circ\text{C}$ . After 1 h, the oil bath was removed, and the Schlenk tube was allowed to cool to room temperature. The reaction mixture was filtered through Celite and eluted with EtOAc ( $3 \times 2$  mL). After evaporated under reduced pressure, the residue was purified by silica gel chromatography (hexanes/EtOAc = 10:1 to 3:1 v/v) to afford 34.0 mg of compound as a white solid (71% yield).  $R_f = 0.32$  (hexanes/EtOAc = 3:1 v/v).

$^1\text{H}$  NMR (600 MHz,  $\text{CDCl}_3$ )  $\delta$  8.12 (s, 1H), 7.39 (s, 1H), 7.37 (s, 1H), 7.15 (s, 1H), 4.89 (s, 2H), 3.71 (s, 3H), 2.25 (s, 3H), 2.20 (s, 3H), 2.19 (s, 3H), 1.38 (s, 9H), 1.30 (s, 12H);  $^{13}\text{C}$  NMR (150 MHz,  $\text{CDCl}_3$ )  $\delta$  163.62, 155.24, 154.72, 148.80, 142.06, 137.39, 132.74, 130.48, 129.80, 124.50, 123.85, 83.59, 80.03, 59.75, 53.44, 28.19, 24.79, 21.02, 13.11, 10.46. HRMS (ESI-TOF)  $m/z$  calc'd for  $\text{C}_{27}\text{H}_{40}\text{BN}_2\text{O}_5$   $[\text{M}+\text{H}]^+$ : 483.3025; found: 483.3020.

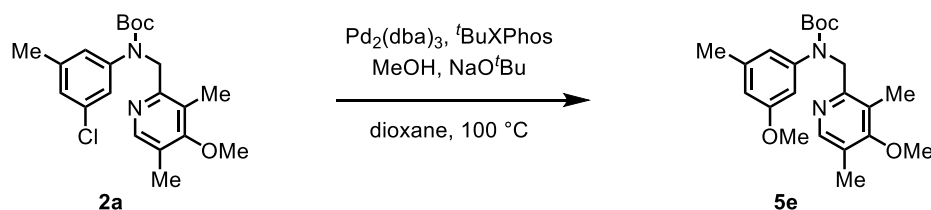

***tert*-Butyl ((4-methoxy-3,5-dimethylpyridin-2-yl)methyl)(3-methoxy-5-methylphenyl)carbamate (5e)**

Arene **2a** (39.0 mg, 0.1 mmol, 1 equiv.),  $\text{Pd}_2(\text{dba})_3$  (2.7 mg, 3  $\mu\text{mol}$ , 3 mol%),  $t\text{BuXPhos}$  (5.1 mg, 12  $\mu\text{mol}$ , 12 mol%), and  $\text{NaO}^t\text{Bu}$  (13.4 mg, 0.14 mmol, 1.4 equiv.) were added to a flame-dried Schlenk tube. The Schlenk tube was evacuated and back-filled with nitrogen. Dioxane (0.4 mL) and MeOH (41  $\mu\text{L}$ , 1.0 mmol, 10 equiv.) were added to the mixture. The Schlenk tube was immersed into a pre-heated oil bath at 100  $^\circ\text{C}$ . After 4 h, the oil bath was removed, and the Schlenk tube was allowed to cool to room temperature. The reaction mixture was filtered through Celite and eluted with EtOAc ( $3 \times 2$  mL). The filtrate was evaporated under reduced pressure. Purification by preparative TLC chromatography (hexane/EtOAc = 3:1 v/v) afforded 33.1 mg of compound **5e** as a yellow liquid (86% yield).  $R_f = 0.43$  (hexanes/EtOAc = 3:1 v/v).

$^1\text{H}$  NMR (600 MHz,  $\text{CDCl}_3$ )  $\delta$  8.16 (s, 1H), 6.67 (s, 1H), 6.62 (d, 1H), 6.48 (s, 1H), 4.87 (s, 2H), 3.72 (s, 3H), 3.70 (s, 3H), 2.24 (s, 3H), 2.21 (s, 3H), 2.20 (s, 3H), 1.39 (s, 9H);  $^{13}\text{C}$  NMR (150 MHz,  $\text{CDCl}_3$ )  $\delta$  163.62, 159.33, 155.10, 154.68, 148.87, 143.76, 138.92, 124.57, 123.62, 119.51, 112.13, 109.48, 80.20, 59.82, 55.16, 53.51, 28.25, 21.53, 13.18, 10.37. HRMS (ESI-TOF)  $m/z$  calc'd for  $\text{C}_{22}\text{H}_{31}\text{N}_2\text{O}_4$   $[\text{M}+\text{H}]^+$ : 387.2278; found: 387.2283.

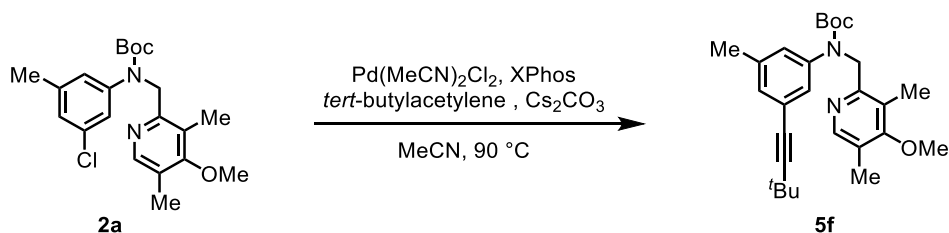

***tert*-Butyl (3-(3,3-dimethylbut-1-yn-1-yl)-5-methylphenyl)((4-methoxy-3,5-dimethylpyridin-2-yl)methyl)carbamate (**5f**).**

Arene **2a** (39.0 mg, 0.1 mmol, 1 equiv.), Pd(MeCN)<sub>2</sub>Cl<sub>2</sub> (1.6 mg, 6.0 μmol, 6 mol%), XPhos (8.9 mg, 18 μmol, 18 mol%), Cs<sub>2</sub>CO<sub>3</sub> (81.5 mg, 0.25 mmol, 2.5 equiv.) were added to a flame-dried Schlenk tube. The Schlenk tube was evacuated and back-filled with nitrogen. MeCN (0.4 mL) was added to the mixture. After stirring for 30 minutes at room temperature, 3,3-dimethylbut-1-yne (17.5 μL, 0.14 mmol, 1.4 equiv.) was added to the reaction mixture. The Schlenk tube was immersed into a pre-heated oil bath at 90 °C. After 6 h, the oil bath was removed, and the Schlenk tube was allowed to cool to room temperature. The reaction mixture was filtered through Celite and eluted with EtOAc (3 × 2 mL). The filtrate was evaporated under reduced pressure. Purification by preparative TLC chromatography (hexane/EtOAc = 3:1 v/v) afforded 41.2 mg of compound **5f** as a yellow liquid (94% yield). R<sub>f</sub> = 0.61 (hexanes/EtOAc = 3:1 v/v).

<sup>1</sup>H NMR (600 MHz, CDCl<sub>3</sub>) δ 8.16 (s, 1H), 7.05 (s, 1H), 6.97 (s, 2H), 4.92 (s, 2H), 3.72 (s, 3H), 2.21 (d, *J* = 3.4 Hz, 6H), 2.20 (s, 3H), 1.38 (s, 9H), 1.27 (s, 9H); <sup>13</sup>C NMR (150 MHz, CDCl<sub>3</sub>) δ 163.64, 155.05, 154.60, 148.94, 142.52, 137.90, 129.65, 126.77, 126.69, 124.61, 123.84, 123.72, 97.96, 80.24, 76.86, 59.82, 53.40, 31.01, 28.22, 27.84, 21.08, 13.18, 10.43. HRMS (ESI-TOF) *m/z* calc'd for C<sub>27</sub>H<sub>37</sub>N<sub>2</sub>O<sub>3</sub> [M+H]<sup>+</sup>: 437.2799; found: 437.2790.

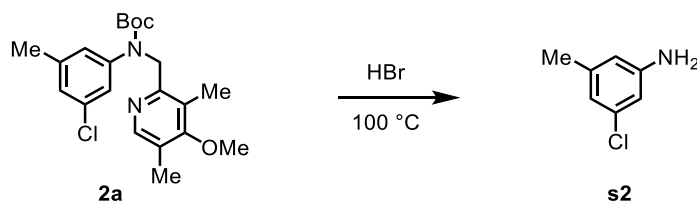

**3-Chloro-5-methylaniline (**s2**).**

HBr aqueous solution (48 wt%, 0.5 mL) was added to arene **2a** (39.0 mg, 0.1 mmol, 1 equiv.) in a round flask. The reaction mixture was stirred at 100 °C overnight. Then the flask was allowed to cool to room temperature. Saturated NaHCO<sub>3</sub> aqueous solution (10 mL) was added to the mixture and extracted with EtOAc (3 × 10 mL). The combined organic layers were dried with Na<sub>2</sub>SO<sub>4</sub>. After the organic solvent was concentrated by rotatory evaporation, the residue was purified by preparative TLC chromatography (hexane/EtOAc = 5:1 v/v) afforded 13.5 mg of compound **s2** as a yellow liquid (95% yield). R<sub>f</sub> = 0.31 (hexanes/EtOAc = 6:1 v/v).

### 3.11 KIE Studies and Competition Experiments

#### A. Measurement of the Kinetic Isotope Effect

Kinetic studies on the *meta*-chlorination of **1a**, **2-D-1a**, and **3-D-1a** were conducted in separate vessels.

Arene (0.05 mmol, 1.0 equiv), Pd(PhCN)<sub>2</sub>Cl<sub>2</sub> (1.9 mg, 5 μmol, 10 mol%), Ligand **9** (2.0 mg, 5 μmol, 10 mol%) and Ag<sub>2</sub>CO<sub>3</sub> (27.6 mg, 0.10 mmol, 2.0 equiv.) were added into a flame-dried Schlenk tube. The Schlenk tube was evacuated and back-filled with nitrogen. Toluene (0.5 mL), cyclohexane (0.5 mL), PhCN (1 μL, 10 μmol, 20 mol%), NBE-CO<sub>2</sub>Me (12 μL, 0.075 mmol, 1.5 equiv.) and 2,6-di<sup>t</sup>Pr-C<sub>6</sub>H<sub>4</sub>OSO<sub>2</sub>Cl (27.7 mg, 0.10 mmol, 2.0 equiv.) were added to the mixture. The Schlenk tube was immersed into a pre-heated oil bath at 100 °C. After indicated time, the oil bath was removed, and the Schlenk tube was cooled by ice water. The reaction mixture was filtered through Celite and eluted with EtOAc (3 × 2 mL). The filtrate was evaporated

under reduced pressure. The yield was determined by  $^1\text{H}$  NMR analysis of the crude product using 1,1,2,2-tetrachloroethane as an internal standard.

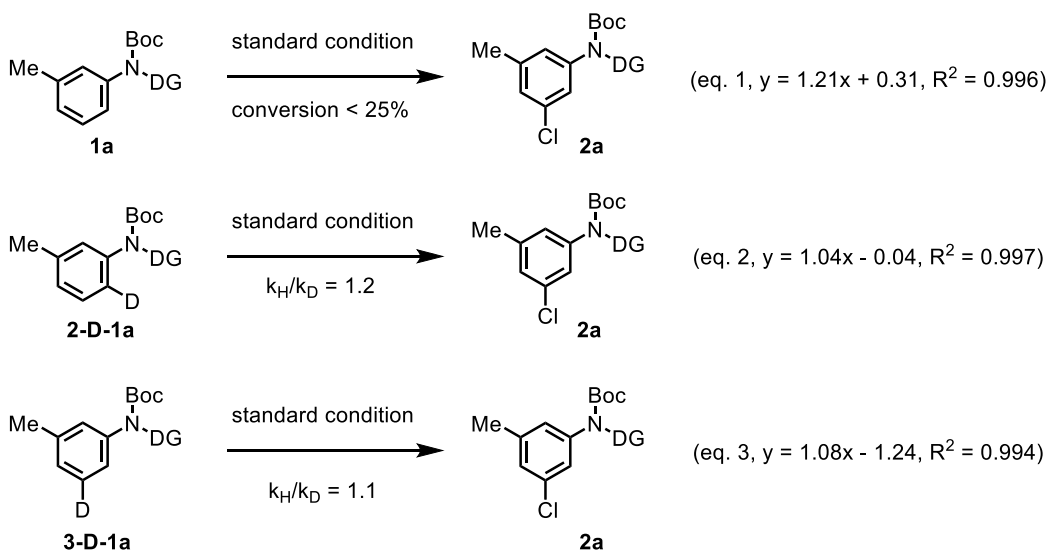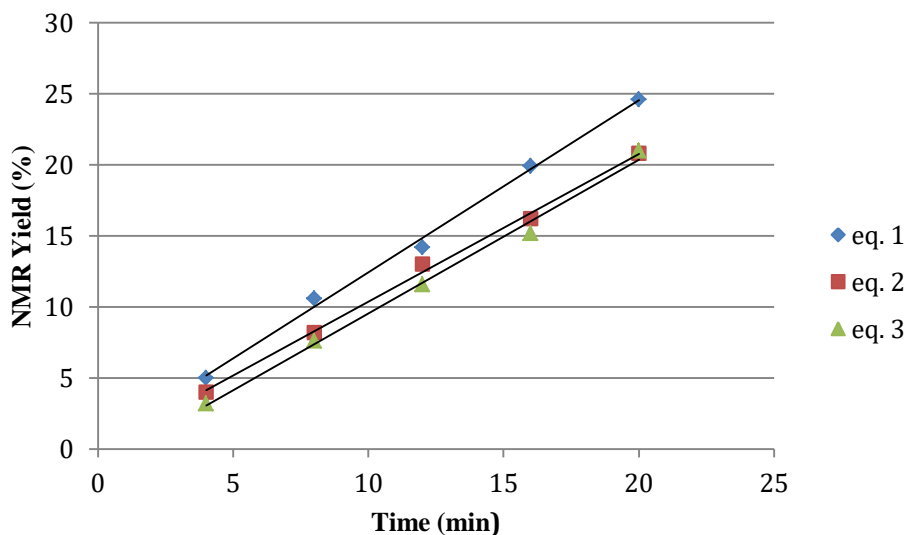

## B. Competition Experiments

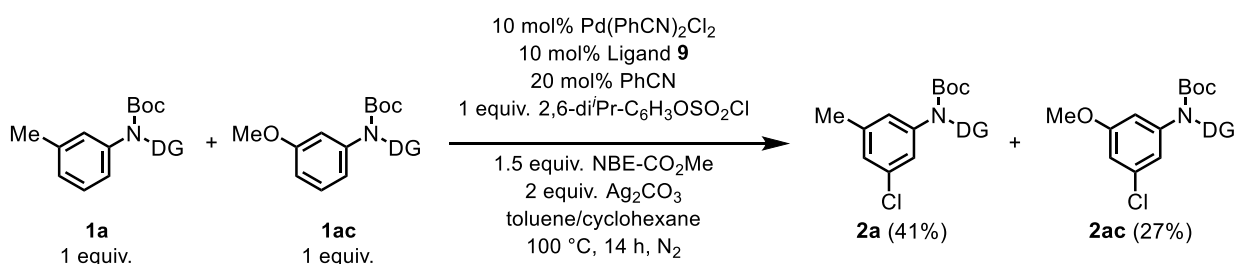

Arenes **1a** (35.6 mg, 0.10 mmol, 1.0 equiv), arenes **1ac** (37.2 mg, 0.10 mmol, 1.0 equiv),  $\text{Pd}(\text{PhCN})_2\text{Cl}_2$  (3.8 mg, 10  $\mu\text{mol}$ , 10 mol%), Ligand **9** (3.9 mg, 10  $\mu\text{mol}$ , 10 mol%) and  $\text{Ag}_2\text{CO}_3$  (55.1 mg, 0.20 mmol, 2.0 equiv.) were added into a flame-dried Schlenk tube. The Schlenk tube was evacuated and back-filled with nitrogen. Toluene (1 mL), cyclohexane (1 mL), PhCN (2  $\mu\text{L}$ , 20  $\mu\text{mol}$ , 20 mol%), NBE- $\text{CO}_2\text{Me}$  (23  $\mu\text{L}$ , 0.15 mmol, 1.5 equiv.) and 2,6-di<sup>i</sup>Pr- $\text{C}_6\text{H}_4\text{OSO}_2\text{Cl}$  (27.7 mg, 0.10 mmol, 1.0 equiv.) were added to the mixture. The Schlenk tube was immersed into a pre-heated oil bath at 100 °C. After indicated time, the oil bath was removed, and the Schlenk tube was cooled by ice water. The reaction mixture was filtered through Celite and eluted with



EtOAc (3 × 2 mL). The filtrate was evaporated under reduced pressure. Purification by preparative TLC chromatography afforded the corresponding products **2a** (16 mg, 41%) and **2ac** (11 mg, 27%).

**2ac**: <sup>1</sup>H NMR (600 MHz, CDCl<sub>3</sub>) δ 8.17 (s, 1H), 6.90 (s, 1H), 6.77 (s, 1H), 6.66 (s, 1H), 4.85 (s, 2H), 3.73 (s, 3H), 3.72 (s, 3H), 2.21 (s, 3H), 2.19 (s, 3H), 1.39 (s, 9H); <sup>13</sup>C NMR (150 MHz, CDCl<sub>3</sub>) δ 164.26, 160.48, 155.18, 154.86, 149.64, 145.47, 134.57, 125.32, 124.03, 119.65, 111.98, 111.68, 81.32, 60.46, 56.08, 53.85, 28.78, 13.79, 10.93. HRMS (ESI-TOF) *m/z* calc'd for C<sub>21</sub>H<sub>28</sub>ClN<sub>2</sub>O<sub>4</sub> [M+H]<sup>+</sup>: 407.1732; found: 407.1739.

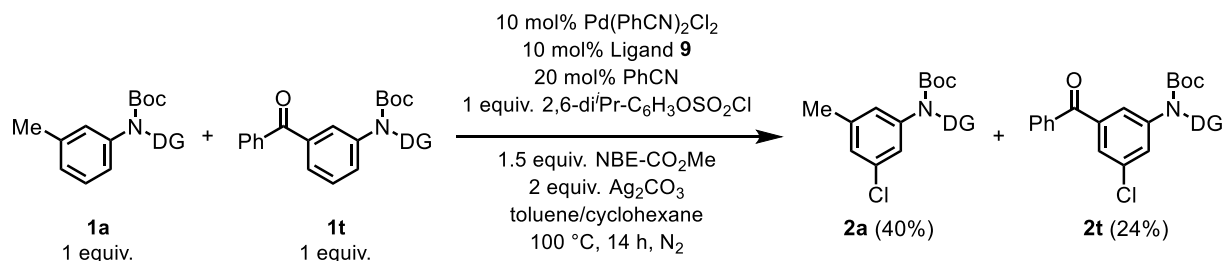

Arenes **1a** (35.6 mg, 0.10 mmol, 1.0 equiv), arenes **1t** (44.7 mg, 0.10 mmol, 1.0 equiv), Pd(PhCN)<sub>2</sub>Cl<sub>2</sub> (3.8 mg, 10 μmol, 10 mol%), Ligand **9** (3.9 mg, 10 μmol, 10 mol%) and Ag<sub>2</sub>CO<sub>3</sub> (55.1 mg, 0.20 mmol, 2.0 equiv.) were added into a flame-dried Schlenk tube. The Schlenk tube was evacuated and back-filled with nitrogen. Toluene (1 mL), cyclohexane (1 mL), PhCN (2 μL, 20 μmol, 20 mol%), NBE-CO<sub>2</sub>Me (23 μL, 0.15 mmol, 1.5 equiv.) and 2,6-di<sup>i</sup>Pr-C<sub>6</sub>H<sub>4</sub>OSO<sub>2</sub>Cl (27.7 mg, 0.10 mmol, 1.0 equiv.) were added to the mixture. The Schlenk tube was immersed into a pre-heated oil bath at 100 °C. After indicated time, the oil bath was removed, and the Schlenk tube was cooled by ice water. The reaction mixture was filtered through Celite and eluted with EtOAc (3 × 2 mL). The filtrate was evaporated under reduced pressure. Purification by preparative TLC chromatography afforded the corresponding products **2a** (15.6 mg, 40%) and **2t** (11.6 mg, 24%).

#### 4. X-ray Crystallographic Data of Compound 2aa

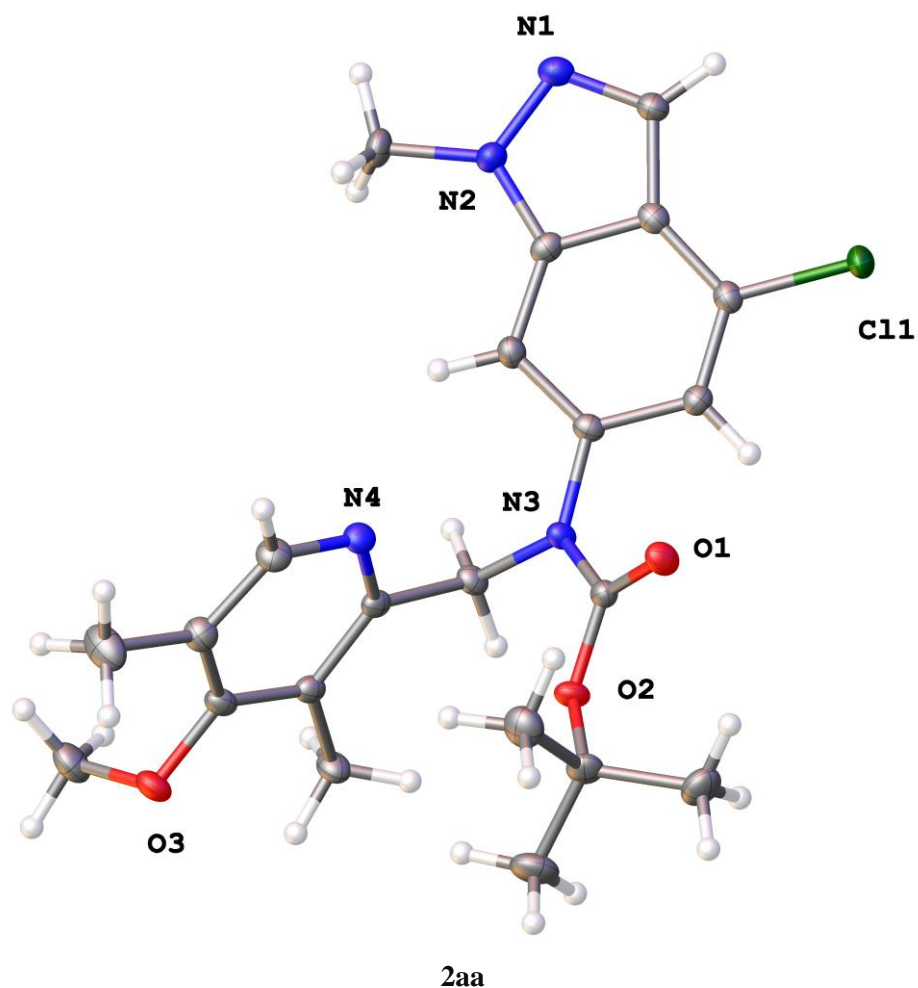

Table 1. Crystal data and structure refinement.

|                      |                                                                  |                   |
|----------------------|------------------------------------------------------------------|-------------------|
| Report date          | 2016-08-01                                                       |                   |
| Identification code  | Yu_SH160727-1                                                    |                   |
| Empirical formula    | C <sub>22</sub> H <sub>27</sub> Cl N <sub>4</sub> O <sub>3</sub> |                   |
| Molecular formula    | C <sub>22</sub> H <sub>27</sub> Cl N <sub>4</sub> O <sub>3</sub> |                   |
| Formula weight       | 430.92                                                           |                   |
| Temperature          | 100.0 K                                                          |                   |
| Wavelength           | 1.54178 Å                                                        |                   |
| Crystal system       | Monoclinic                                                       |                   |
| Space group          | P 1 2 <sub>1</sub> /n 1                                          |                   |
| Unit cell dimensions | a = 14.7646(4) Å                                                 | ∠ = 90°.          |
|                      | b = 8.9396(2) Å                                                  | ∠ = 90.0910(10)°. |
|                      | c = 16.5413(4) Å                                                 | ∠ = 90°.          |

|                                   |                                             |
|-----------------------------------|---------------------------------------------|
| Volume                            | 2183.28(9) Å <sup>3</sup>                   |
| Z                                 | 4                                           |
| Density (calculated)              | 1.311 Mg/m <sup>3</sup>                     |
| Absorption coefficient            | 1.803 mm <sup>-1</sup>                      |
| F(000)                            | 912                                         |
| Crystal size                      | 0.2 x 0.12 x 0.12 mm <sup>3</sup>           |
| Crystal color, habit              | colorless block                             |
| Theta range for data collection   | 5.348 to 68.292°.                           |
| Index ranges                      | -17<=h<=17, -10<=k<=9, -19<=l<=19           |
| Reflections collected             | 20152                                       |
| Independent reflections           | 3973 [R(int) = 0.0405]                      |
| Completeness to theta = 67.500°   | 99.3 %                                      |
| Absorption correction             | Semi-empirical from equivalents             |
| Max. and min. transmission        | 0.5210 and 0.4208                           |
| Refinement method                 | Full-matrix least-squares on F <sup>2</sup> |
| Data / restraints / parameters    | 3973 / 0 / 278                              |
| Goodness-of-fit on F <sup>2</sup> | 1.063                                       |
| Final R indices [I>2sigma(I)]     | R1 = 0.0370, wR2 = 0.0908                   |
| R indices (all data)              | R1 = 0.0382, wR2 = 0.0915                   |
| Extinction coefficient            | n/a                                         |
| Largest diff. peak and hole       | 0.475 and -0.328 e.Å <sup>-3</sup>          |

Table 2. Atomic coordinates ( $\times 10^4$ ) and equivalent isotropic displacement parameters ( $\text{Å}^2 \times 10^3$ ).  $U(\text{eq})$  is defined as one third of the trace of the orthogonalized  $U^{ij}$  tensor.

|       | x       | y       | z       | U(eq) |
|-------|---------|---------|---------|-------|
| Cl(1) | 5863(1) | 2590(1) | 9193(1) | 23(1) |
| O(1)  | 6023(1) | 1526(1) | 6281(1) | 21(1) |
| O(2)  | 7169(1) | 1774(1) | 5370(1) | 18(1) |
| O(3)  | 7820(1) | 5663(1) | 2896(1) | 22(1) |
| N(1)  | 5412(1) | 7631(1) | 8744(1) | 21(1) |
| N(2)  | 5746(1) | 7597(1) | 7976(1) | 19(1) |
| N(3)  | 6998(1) | 3528(1) | 6302(1) | 16(1) |

---

|       |         |         |         |       |
|-------|---------|---------|---------|-------|
| N(4)  | 6324(1) | 5184(1) | 5003(1) | 18(1) |
| C(1)  | 5480(1) | 6251(2) | 9021(1) | 18(1) |
| C(2)  | 5864(1) | 5282(2) | 8438(1) | 16(1) |
| C(3)  | 6090(1) | 3769(2) | 8377(1) | 16(1) |
| C(4)  | 6474(1) | 3218(2) | 7688(1) | 16(1) |
| C(5)  | 6610(1) | 4164(2) | 7007(1) | 15(1) |
| C(6)  | 6385(1) | 5665(2) | 7031(1) | 17(1) |
| C(7)  | 6028(1) | 6201(2) | 7764(1) | 17(1) |
| C(8)  | 5790(1) | 8931(2) | 7485(1) | 22(1) |
| C(9)  | 6666(1) | 2198(2) | 6003(1) | 15(1) |
| C(10) | 6847(1) | 591(2)  | 4816(1) | 21(1) |
| C(11) | 7601(1) | 546(2)  | 4190(1) | 32(1) |
| C(12) | 6769(1) | -897(2) | 5253(1) | 28(1) |
| C(13) | 5956(1) | 1088(2) | 4439(1) | 28(1) |
| C(14) | 7620(1) | 4412(2) | 5799(1) | 16(1) |
| C(15) | 7214(1) | 4895(1) | 4997(1) | 15(1) |
| C(16) | 7758(1) | 5028(1) | 4307(1) | 15(1) |
| C(17) | 7331(1) | 5541(2) | 3606(1) | 17(1) |
| C(18) | 6405(1) | 5863(2) | 3593(1) | 20(1) |
| C(19) | 5939(1) | 5641(2) | 4311(1) | 20(1) |
| C(20) | 5935(1) | 6405(2) | 2840(1) | 32(1) |
| C(21) | 8248(1) | 7093(2) | 2804(1) | 27(1) |
| C(22) | 8748(1) | 4597(2) | 4292(1) | 21(1) |

---

Table 3. Bond lengths [ $\text{\AA}$ ] and angles [ $^\circ$ ].

---

|            |            |            |            |
|------------|------------|------------|------------|
| Cl(1)-C(3) | 1.7459(14) | N(1)-C(1)  | 1.3197(19) |
| O(1)-C(9)  | 1.2150(17) | N(2)-C(7)  | 1.3617(18) |
| O(2)-C(9)  | 1.3401(16) | N(2)-C(8)  | 1.4433(18) |
| O(2)-C(10) | 1.4765(16) | N(3)-C(5)  | 1.4194(17) |
| O(3)-C(17) | 1.3838(16) | N(3)-C(9)  | 1.3773(17) |
| O(3)-C(21) | 1.4340(19) | N(3)-C(14) | 1.4700(17) |
| N(1)-N(2)  | 1.3638(17) | N(4)-C(15) | 1.3391(17) |

## SUPPORTING INFORMATION

---

|              |            |                  |            |
|--------------|------------|------------------|------------|
| N(4)-C(19)   | 1.3414(19) | C(18)-C(19)      | 1.388(2)   |
| C(1)-H(1)    | 0.9500     | C(18)-C(20)      | 1.505(2)   |
| C(1)-C(2)    | 1.4161(19) | C(19)-H(19)      | 0.9500     |
| C(2)-C(3)    | 1.397(2)   | C(20)-H(20A)     | 0.9800     |
| C(2)-C(7)    | 1.4057(19) | C(20)-H(20B)     | 0.9800     |
| C(3)-C(4)    | 1.3662(19) | C(20)-H(20C)     | 0.9800     |
| C(4)-H(4)    | 0.9500     | C(21)-H(21A)     | 0.9800     |
| C(4)-C(5)    | 1.4229(19) | C(21)-H(21B)     | 0.9800     |
| C(5)-C(6)    | 1.3826(19) | C(21)-H(21C)     | 0.9800     |
| C(6)-H(6)    | 0.9500     | C(22)-H(22A)     | 0.9800     |
| C(6)-C(7)    | 1.4072(19) | C(22)-H(22B)     | 0.9800     |
| C(8)-H(8A)   | 0.9800     | C(22)-H(22C)     | 0.9800     |
| C(8)-H(8B)   | 0.9800     |                  |            |
| C(8)-H(8C)   | 0.9800     | C(9)-O(2)-C(10)  | 120.65(10) |
| C(10)-C(11)  | 1.522(2)   | C(17)-O(3)-C(21) | 113.06(11) |
| C(10)-C(12)  | 1.518(2)   | C(1)-N(1)-N(2)   | 106.06(11) |
| C(10)-C(13)  | 1.521(2)   | N(1)-N(2)-C(8)   | 121.47(11) |
| C(11)-H(11A) | 0.9800     | C(7)-N(2)-N(1)   | 111.73(11) |
| C(11)-H(11B) | 0.9800     | C(7)-N(2)-C(8)   | 126.79(12) |
| C(11)-H(11C) | 0.9800     | C(5)-N(3)-C(14)  | 120.22(11) |
| C(12)-H(12A) | 0.9800     | C(9)-N(3)-C(5)   | 119.73(11) |
| C(12)-H(12B) | 0.9800     | C(9)-N(3)-C(14)  | 118.92(11) |
| C(12)-H(12C) | 0.9800     | C(15)-N(4)-C(19) | 117.87(11) |
| C(13)-H(13A) | 0.9800     | N(1)-C(1)-H(1)   | 124.3      |
| C(13)-H(13B) | 0.9800     | N(1)-C(1)-C(2)   | 111.38(12) |
| C(13)-H(13C) | 0.9800     | C(2)-C(1)-H(1)   | 124.3      |
| C(14)-H(14A) | 0.9900     | C(3)-C(2)-C(1)   | 137.52(13) |
| C(14)-H(14B) | 0.9900     | C(3)-C(2)-C(7)   | 117.85(12) |
| C(14)-C(15)  | 1.5169(19) | C(7)-C(2)-C(1)   | 104.63(12) |
| C(15)-C(16)  | 1.4022(18) | C(2)-C(3)-Cl(1)  | 118.86(10) |
| C(16)-C(17)  | 1.396(2)   | C(4)-C(3)-Cl(1)  | 120.54(11) |
| C(16)-C(22)  | 1.5112(18) | C(4)-C(3)-C(2)   | 120.60(12) |
| C(17)-C(18)  | 1.3971(19) | C(3)-C(4)-H(4)   | 119.8      |

---

|                     |            |                     |            |
|---------------------|------------|---------------------|------------|
| C(3)-C(4)-C(5)      | 120.35(12) | C(10)-C(12)-H(12B)  | 109.5      |
| C(5)-C(4)-H(4)      | 119.8      | C(10)-C(12)-H(12C)  | 109.5      |
| N(3)-C(5)-C(4)      | 118.05(12) | H(12A)-C(12)-H(12B) | 109.5      |
| C(6)-C(5)-N(3)      | 120.63(12) | H(12A)-C(12)-H(12C) | 109.5      |
| C(6)-C(5)-C(4)      | 121.31(12) | H(12B)-C(12)-H(12C) | 109.5      |
| C(5)-C(6)-H(6)      | 121.8      | C(10)-C(13)-H(13A)  | 109.5      |
| C(5)-C(6)-C(7)      | 116.50(12) | C(10)-C(13)-H(13B)  | 109.5      |
| C(7)-C(6)-H(6)      | 121.8      | C(10)-C(13)-H(13C)  | 109.5      |
| N(2)-C(7)-C(2)      | 106.21(12) | H(13A)-C(13)-H(13B) | 109.5      |
| N(2)-C(7)-C(6)      | 130.45(13) | H(13A)-C(13)-H(13C) | 109.5      |
| C(2)-C(7)-C(6)      | 123.30(13) | H(13B)-C(13)-H(13C) | 109.5      |
| N(2)-C(8)-H(8A)     | 109.5      | N(3)-C(14)-H(14A)   | 108.8      |
| N(2)-C(8)-H(8B)     | 109.5      | N(3)-C(14)-H(14B)   | 108.8      |
| N(2)-C(8)-H(8C)     | 109.5      | N(3)-C(14)-C(15)    | 113.69(11) |
| H(8A)-C(8)-H(8B)    | 109.5      | H(14A)-C(14)-H(14B) | 107.7      |
| H(8A)-C(8)-H(8C)    | 109.5      | C(15)-C(14)-H(14A)  | 108.8      |
| H(8B)-C(8)-H(8C)    | 109.5      | C(15)-C(14)-H(14B)  | 108.8      |
| O(1)-C(9)-O(2)      | 126.16(12) | N(4)-C(15)-C(14)    | 115.74(11) |
| O(1)-C(9)-N(3)      | 124.73(12) | N(4)-C(15)-C(16)    | 123.58(12) |
| O(2)-C(9)-N(3)      | 109.11(11) | C(16)-C(15)-C(14)   | 120.68(11) |
| O(2)-C(10)-C(11)    | 101.87(11) | C(15)-C(16)-C(22)   | 123.15(12) |
| O(2)-C(10)-C(12)    | 110.90(11) | C(17)-C(16)-C(15)   | 116.42(12) |
| O(2)-C(10)-C(13)    | 108.76(12) | C(17)-C(16)-C(22)   | 120.40(12) |
| C(12)-C(10)-C(11)   | 110.94(13) | O(3)-C(17)-C(16)    | 119.61(12) |
| C(12)-C(10)-C(13)   | 112.64(13) | O(3)-C(17)-C(18)    | 118.88(12) |
| C(13)-C(10)-C(11)   | 111.20(13) | C(16)-C(17)-C(18)   | 121.43(12) |
| C(10)-C(11)-H(11A)  | 109.5      | C(17)-C(18)-C(20)   | 121.92(13) |
| C(10)-C(11)-H(11B)  | 109.5      | C(19)-C(18)-C(17)   | 116.36(13) |
| C(10)-C(11)-H(11C)  | 109.5      | C(19)-C(18)-C(20)   | 121.72(13) |
| H(11A)-C(11)-H(11B) | 109.5      | N(4)-C(19)-C(18)    | 124.30(12) |
| H(11A)-C(11)-H(11C) | 109.5      | N(4)-C(19)-H(19)    | 117.9      |
| H(11B)-C(11)-H(11C) | 109.5      | C(18)-C(19)-H(19)   | 117.9      |
| C(10)-C(12)-H(12A)  | 109.5      | C(18)-C(20)-H(20A)  | 109.5      |

|                     |       |                     |       |
|---------------------|-------|---------------------|-------|
| C(18)-C(20)-H(20B)  | 109.5 | H(21A)-C(21)-H(21C) | 109.5 |
| C(18)-C(20)-H(20C)  | 109.5 | H(21B)-C(21)-H(21C) | 109.5 |
| H(20A)-C(20)-H(20B) | 109.5 | C(16)-C(22)-H(22A)  | 109.5 |
| H(20A)-C(20)-H(20C) | 109.5 | C(16)-C(22)-H(22B)  | 109.5 |
| H(20B)-C(20)-H(20C) | 109.5 | C(16)-C(22)-H(22C)  | 109.5 |
| O(3)-C(21)-H(21A)   | 109.5 | H(22A)-C(22)-H(22B) | 109.5 |
| O(3)-C(21)-H(21B)   | 109.5 | H(22A)-C(22)-H(22C) | 109.5 |
| O(3)-C(21)-H(21C)   | 109.5 | H(22B)-C(22)-H(22C) | 109.5 |
| H(21A)-C(21)-H(21B) | 109.5 |                     |       |

Table 4. Anisotropic displacement parameters ( $\text{\AA}^2 \times 10^3$ ). The anisotropic displacement factor exponent takes the form:  $-2 \square^2 [ h^2 a^* U^{11} + \dots + 2 h k a^* b^* U^{12} ]$

|       | U <sup>11</sup> | U <sup>22</sup> | U <sup>33</sup> | U <sup>23</sup> | U <sup>13</sup> | U <sup>12</sup> |
|-------|-----------------|-----------------|-----------------|-----------------|-----------------|-----------------|
| Cl(1) | 30(1)           | 19(1)           | 19(1)           | 6(1)            | 8(1)            | 4(1)            |
| O(1)  | 25(1)           | 18(1)           | 20(1)           | -1(1)           | 5(1)            | -6(1)           |
| O(2)  | 22(1)           | 17(1)           | 16(1)           | -5(1)           | 4(1)            | -1(1)           |
| O(3)  | 25(1)           | 26(1)           | 15(1)           | -1(1)           | 6(1)            | -1(1)           |
| N(1)  | 22(1)           | 21(1)           | 19(1)           | -3(1)           | 2(1)            | 2(1)            |
| N(2)  | 24(1)           | 15(1)           | 18(1)           | -1(1)           | 2(1)            | 2(1)            |
| N(3)  | 18(1)           | 14(1)           | 14(1)           | -1(1)           | 4(1)            | -2(1)           |
| N(4)  | 15(1)           | 18(1)           | 19(1)           | 0(1)            | 3(1)            | -1(1)           |
| C(1)  | 18(1)           | 19(1)           | 16(1)           | -1(1)           | 2(1)            | 1(1)            |
| C(2)  | 14(1)           | 20(1)           | 15(1)           | 0(1)            | -1(1)           | -1(1)           |
| C(3)  | 15(1)           | 19(1)           | 15(1)           | 2(1)            | 0(1)            | -1(1)           |
| C(4)  | 16(1)           | 15(1)           | 18(1)           | 0(1)            | 0(1)            | 0(1)            |
| C(5)  | 14(1)           | 17(1)           | 14(1)           | -2(1)           | 0(1)            | -1(1)           |
| C(6)  | 19(1)           | 16(1)           | 15(1)           | 1(1)            | 0(1)            | -2(1)           |
| C(7)  | 15(1)           | 14(1)           | 20(1)           | -2(1)           | -2(1)           | 0(1)            |
| C(8)  | 27(1)           | 14(1)           | 23(1)           | 6(1)            | -1(1)           | -1(1)           |
| C(9)  | 18(1)           | 14(1)           | 13(1)           | 1(1)            | 1(1)            | 2(1)            |
| C(10) | 28(1)           | 18(1)           | 17(1)           | -7(1)           | 0(1)            | -1(1)           |

|       |       |       |       |        |       |       |
|-------|-------|-------|-------|--------|-------|-------|
| C(11) | 37(1) | 35(1) | 23(1) | -12(1) | 7(1)  | 1(1)  |
| C(12) | 38(1) | 17(1) | 30(1) | -5(1)  | -2(1) | 2(1)  |
| C(13) | 32(1) | 32(1) | 21(1) | -2(1)  | -5(1) | -1(1) |
| C(14) | 16(1) | 18(1) | 16(1) | 0(1)   | 3(1)  | -3(1) |
| C(15) | 16(1) | 11(1) | 17(1) | -2(1)  | 2(1)  | -2(1) |
| C(16) | 16(1) | 13(1) | 18(1) | -2(1)  | 2(1)  | -2(1) |
| C(17) | 19(1) | 16(1) | 15(1) | -3(1)  | 4(1)  | -3(1) |
| C(18) | 18(1) | 21(1) | 19(1) | -1(1)  | -2(1) | -2(1) |
| C(19) | 14(1) | 23(1) | 23(1) | 0(1)   | 1(1)  | -1(1) |
| C(20) | 22(1) | 50(1) | 24(1) | 6(1)   | -3(1) | 1(1)  |
| C(21) | 28(1) | 33(1) | 21(1) | 3(1)   | 6(1)  | -6(1) |
| C(22) | 17(1) | 26(1) | 20(1) | 2(1)   | 4(1)  | 2(1)  |

Table 5. Hydrogen coordinates ( $\times 10^4$ ) and isotropic displacement parameters ( $\text{\AA}^2 \times 10^3$ ).

|        | x    | y     | z    | U(eq) |
|--------|------|-------|------|-------|
| H(1)   | 5294 | 5947  | 9546 | 21    |
| H(4)   | 6652 | 2197  | 7663 | 19    |
| H(6)   | 6469 | 6300  | 6577 | 20    |
| H(8A)  | 5557 | 9783  | 7794 | 32    |
| H(8B)  | 5424 | 8792  | 6997 | 32    |
| H(8C)  | 6421 | 9123  | 7333 | 32    |
| H(11A) | 7683 | 1546  | 3958 | 48    |
| H(11B) | 7440 | -160  | 3761 | 48    |
| H(11C) | 8166 | 225   | 4449 | 48    |
| H(12A) | 7311 | -1058 | 5586 | 43    |
| H(12B) | 6715 | -1706 | 4856 | 43    |
| H(12C) | 6232 | -887  | 5600 | 43    |
| H(13A) | 5500 | 1210  | 4864 | 43    |
| H(13B) | 5751 | 331   | 4052 | 43    |
| H(13C) | 6044 | 2043  | 4160 | 43    |
| H(14A) | 8170 | 3813  | 5693 | 20    |
| H(14B) | 7806 | 5314  | 6104 | 20    |



SUPPORTING INFORMATION

---

|        |      |      |      |    |
|--------|------|------|------|----|
| H(19)  | 5305 | 5824 | 4312 | 24 |
| H(20A) | 5979 | 5639 | 2418 | 48 |
| H(20B) | 6225 | 7328 | 2652 | 48 |
| H(20C) | 5296 | 6602 | 2960 | 48 |
| H(21A) | 8642 | 7074 | 2327 | 41 |
| H(21B) | 8611 | 7313 | 3286 | 41 |
| H(21C) | 7785 | 7867 | 2735 | 41 |
| H(22A) | 9112 | 5417 | 4513 | 31 |
| H(22B) | 8933 | 4397 | 3733 | 31 |
| H(22C) | 8839 | 3696 | 4620 | 31 |

---

## 5. NMR Spectra

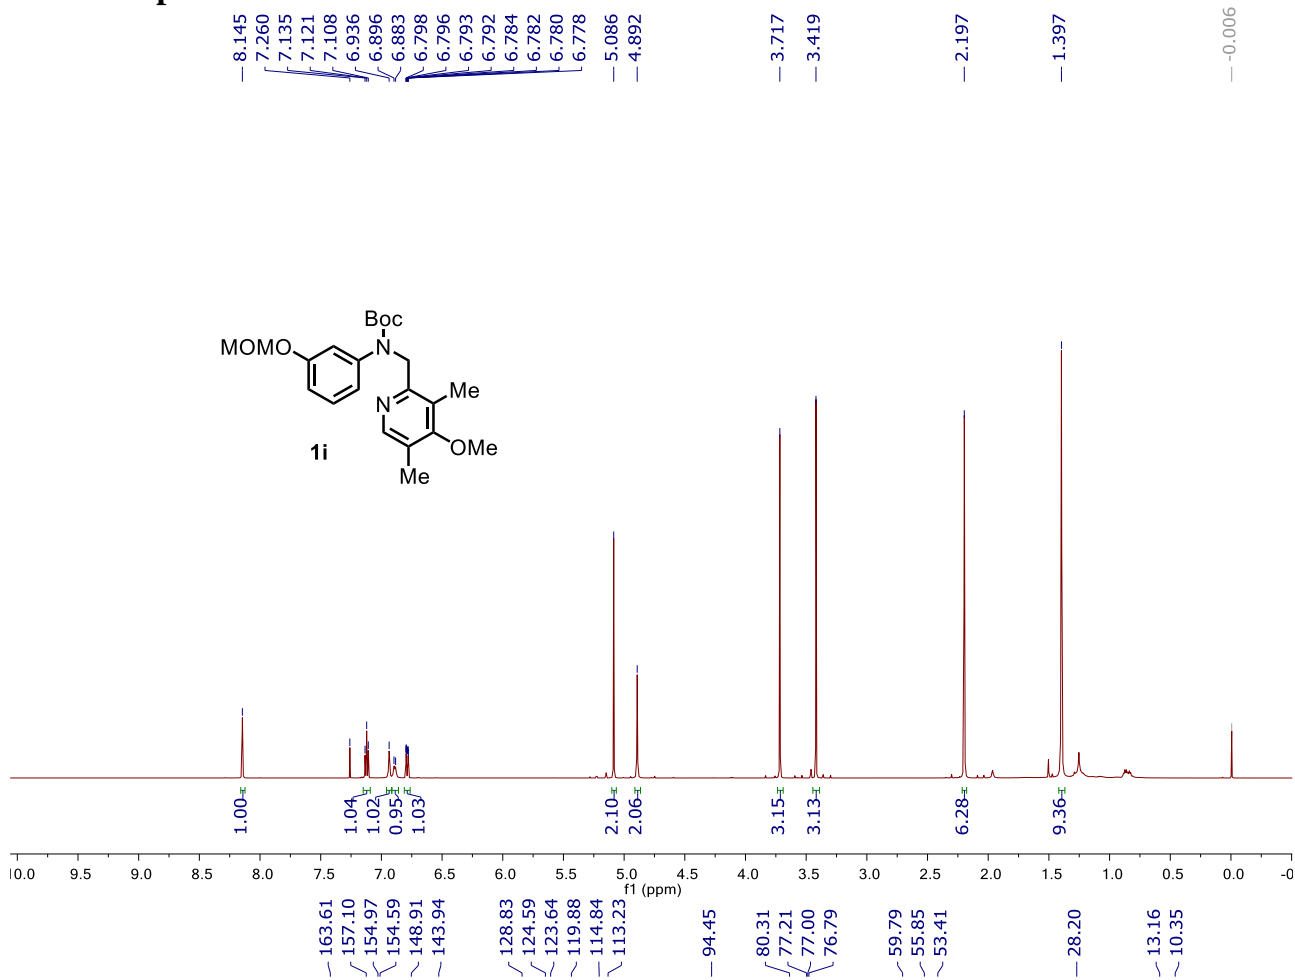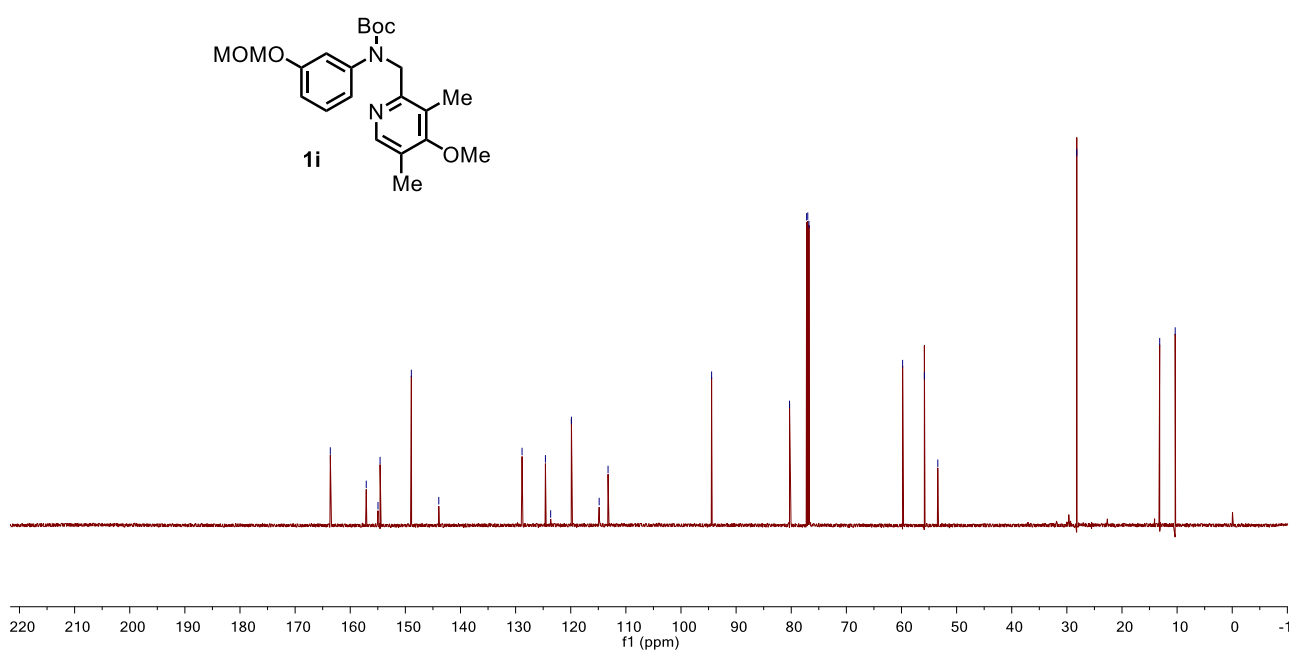

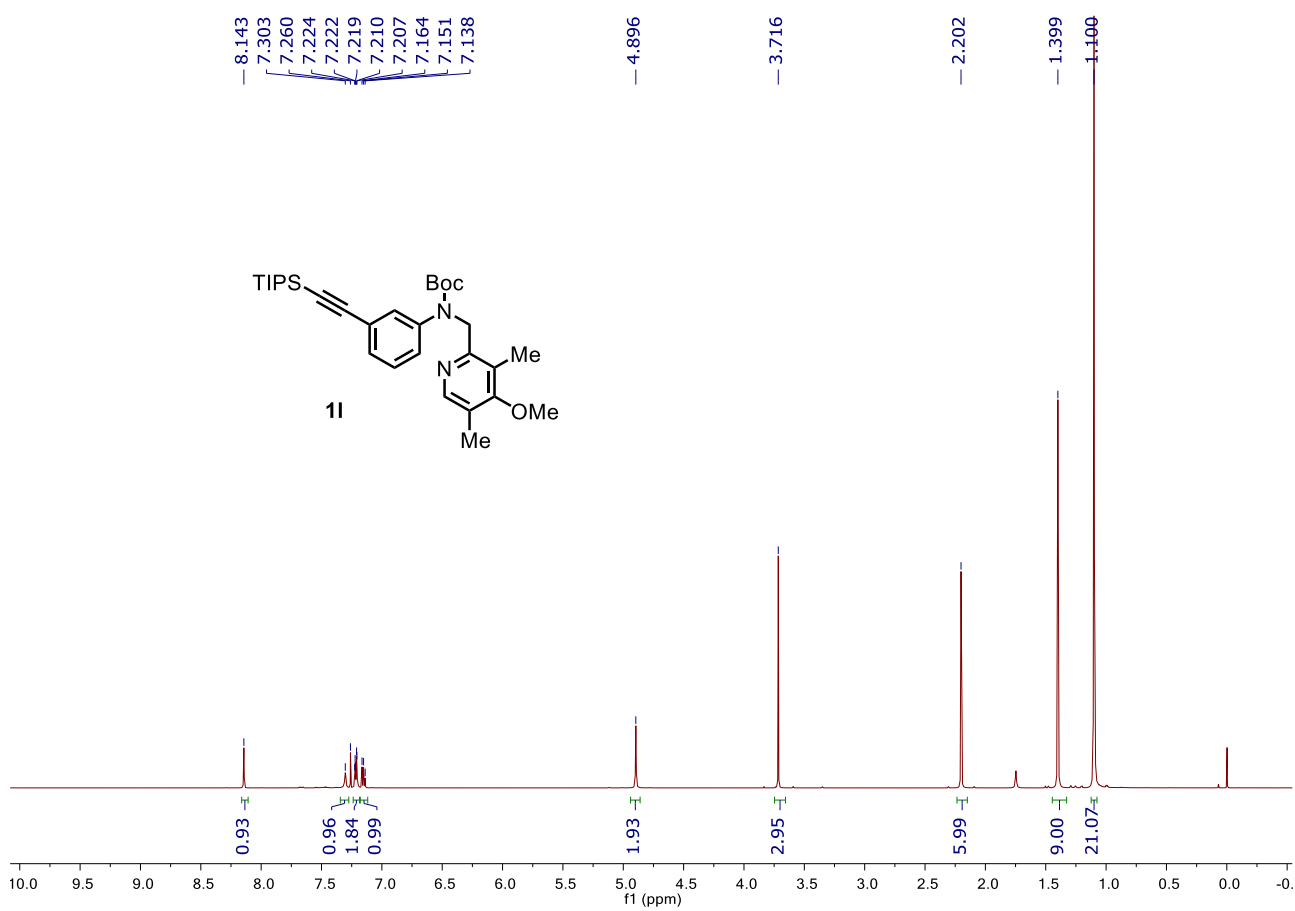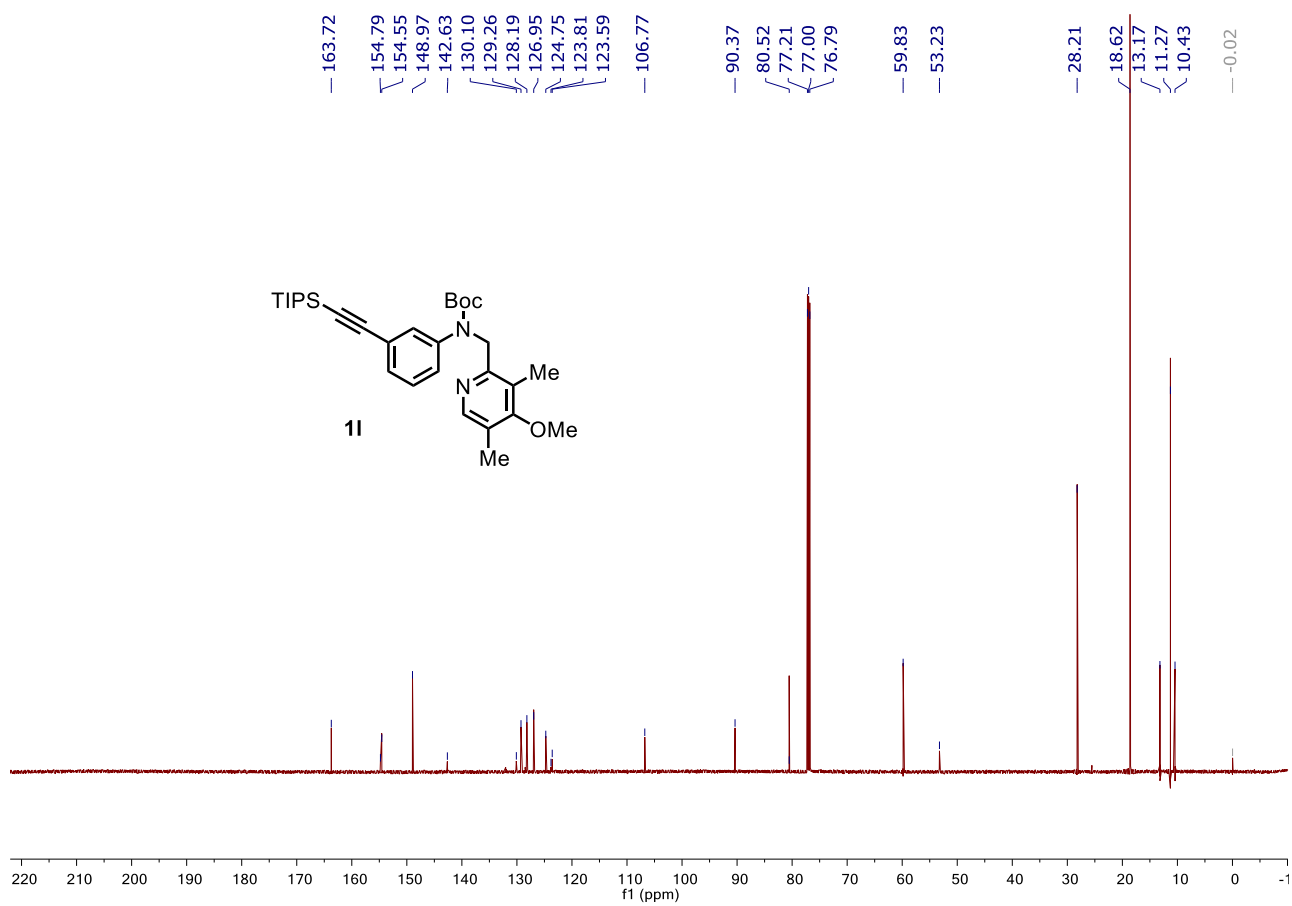

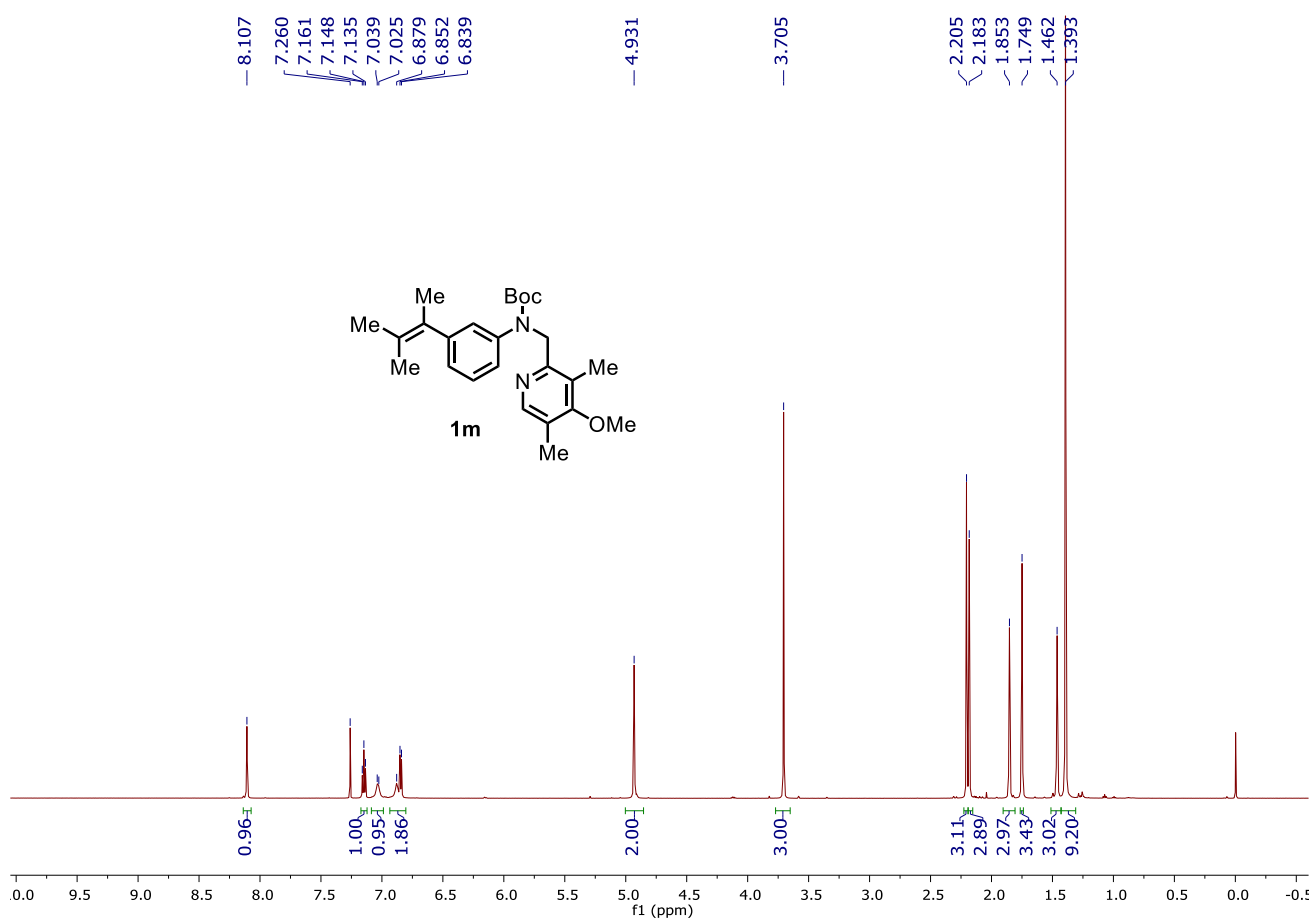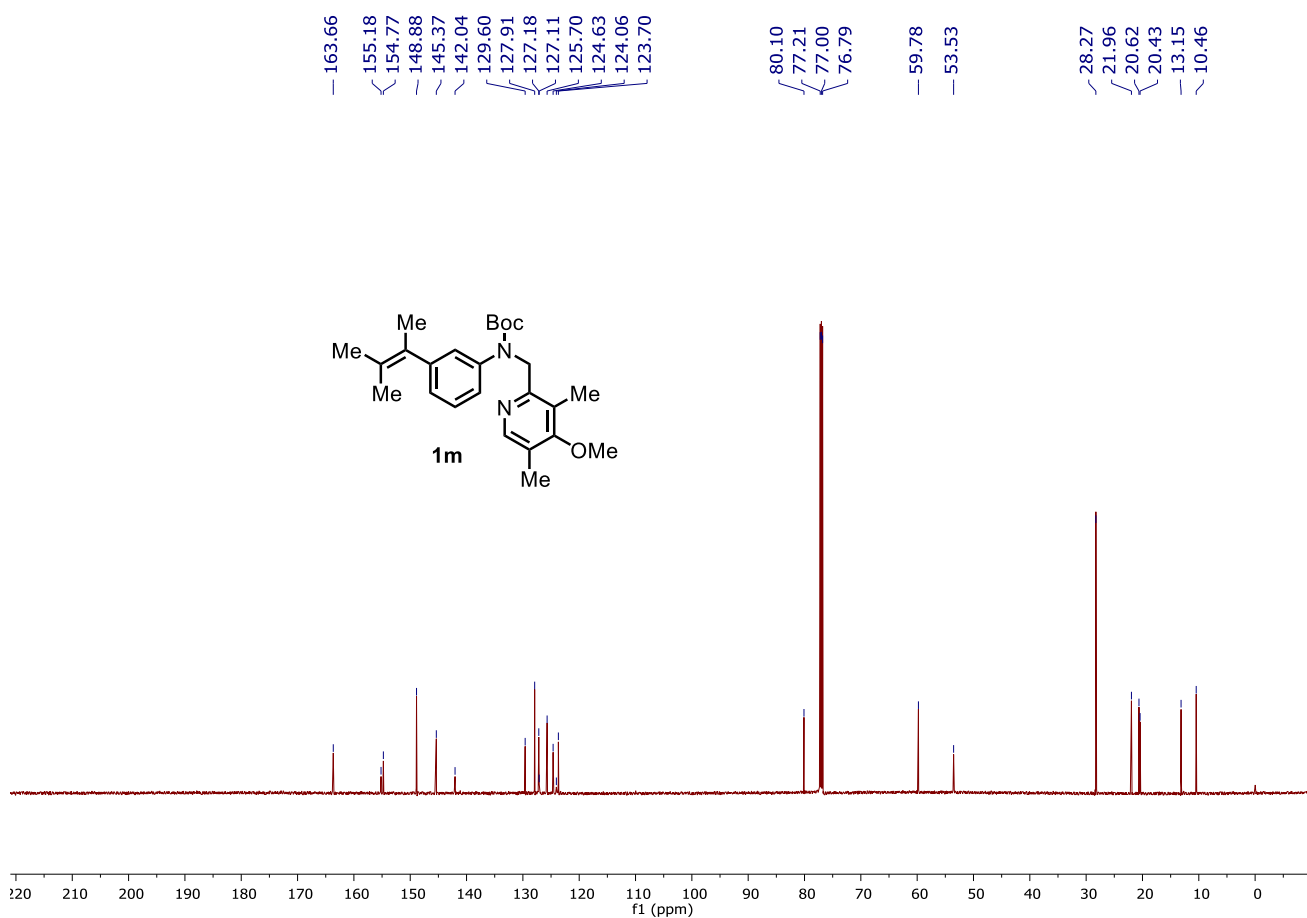

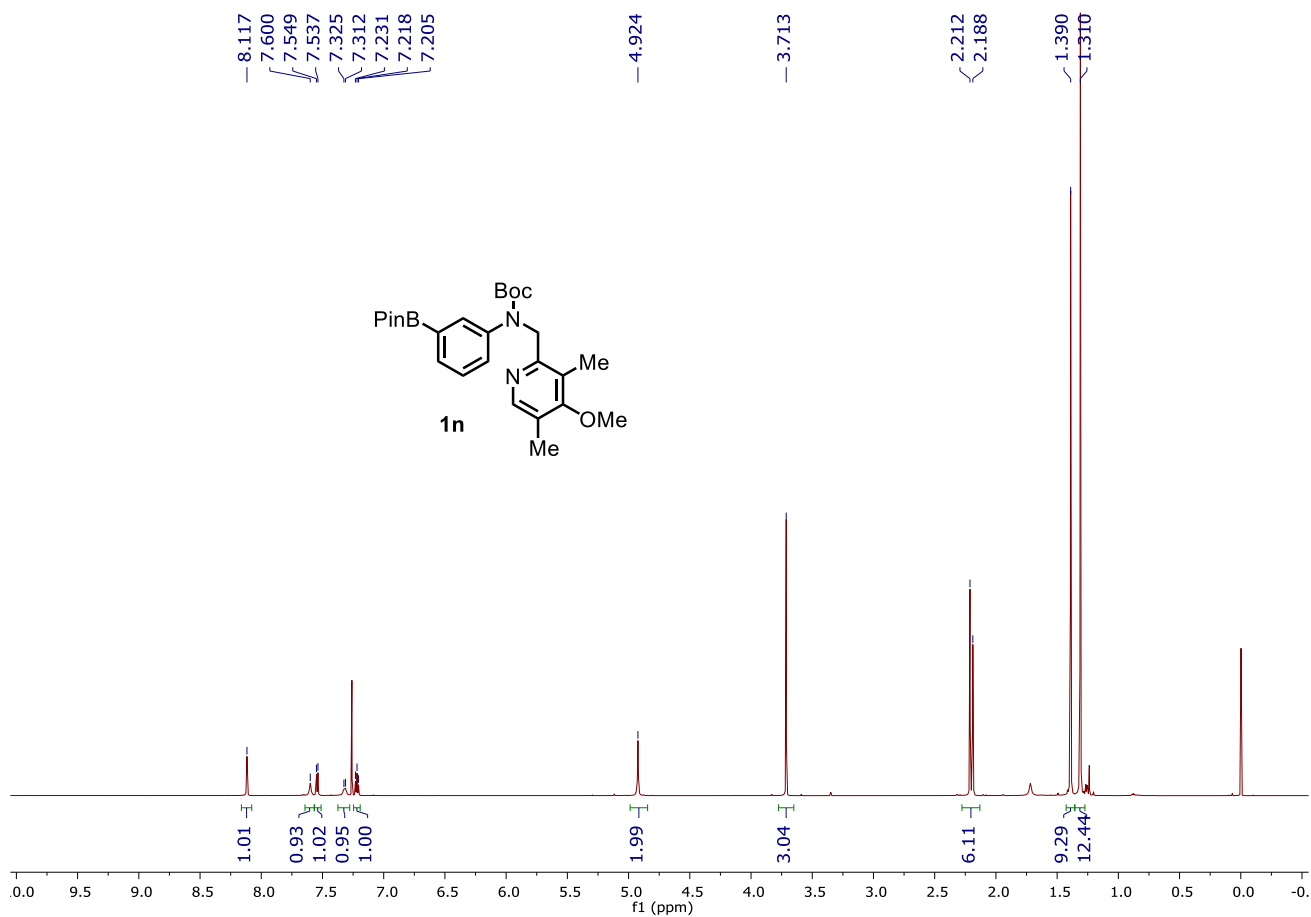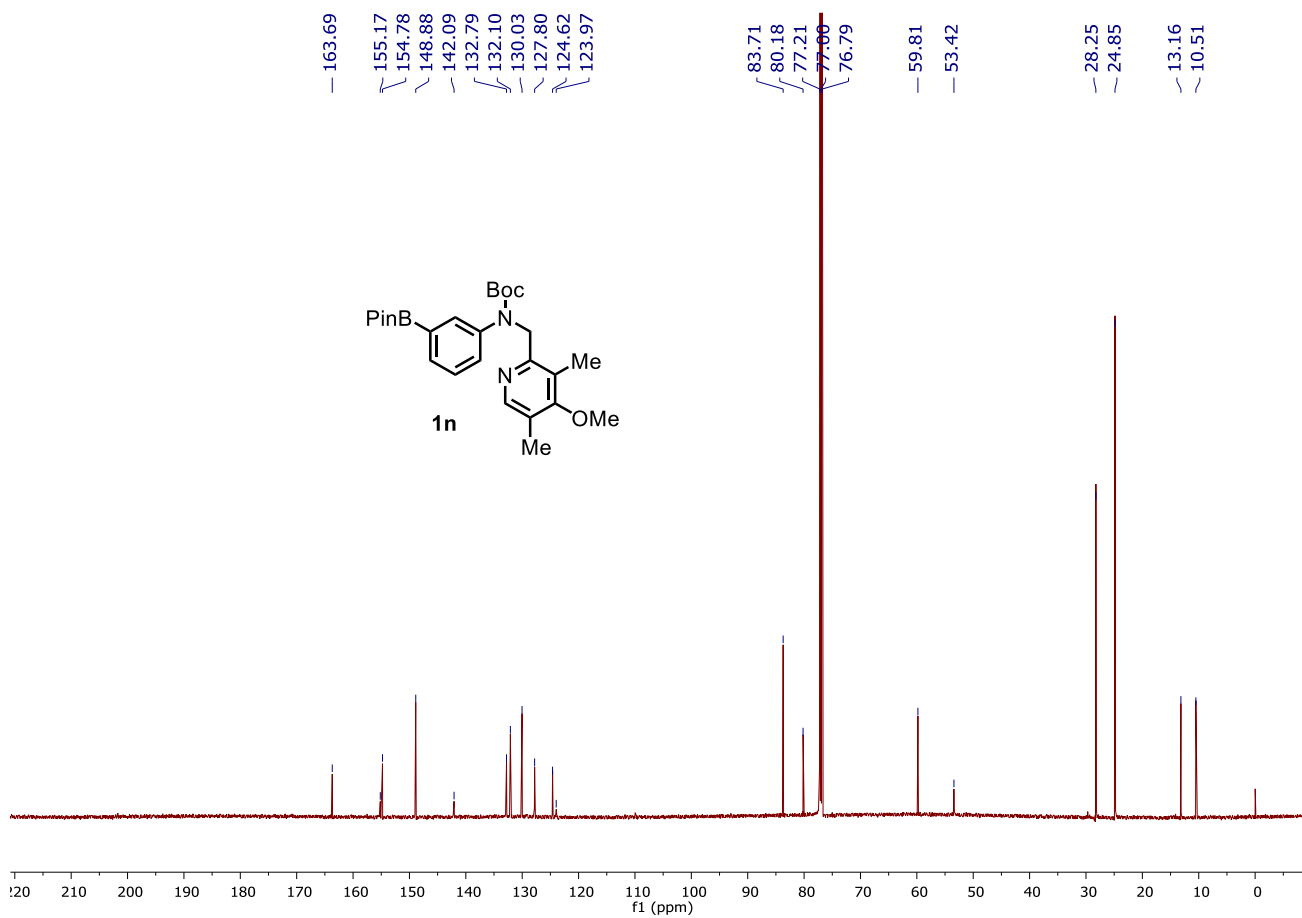

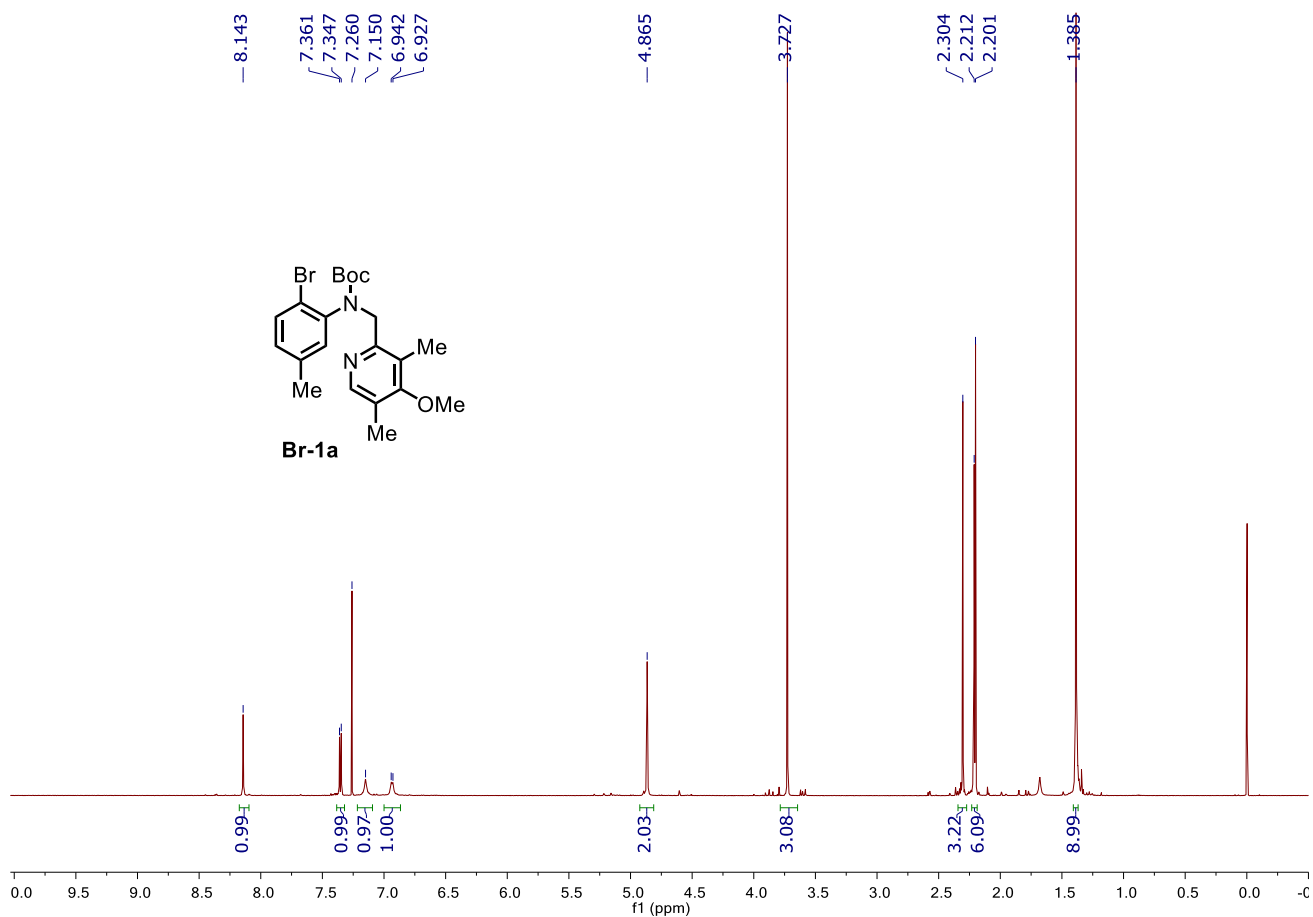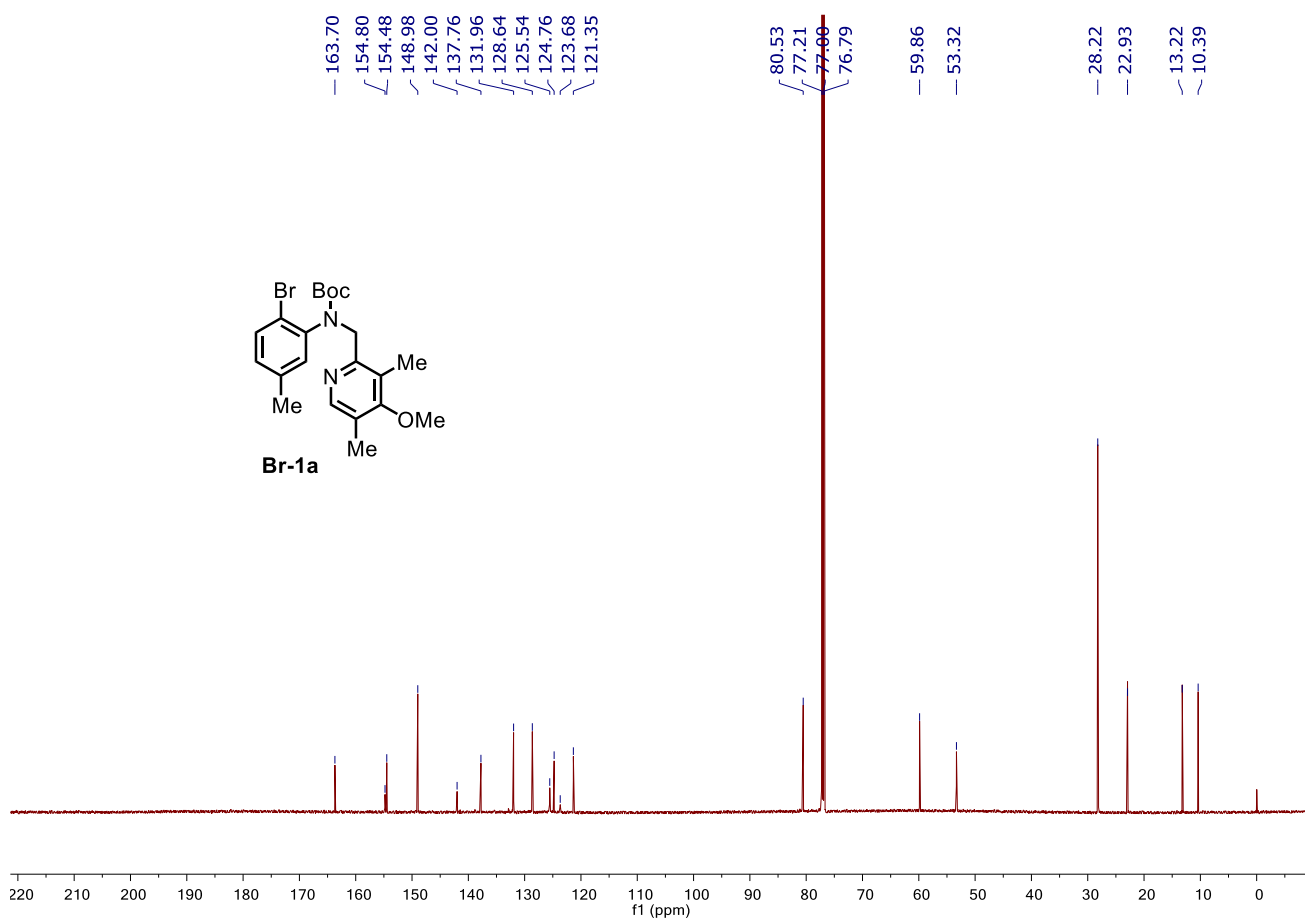

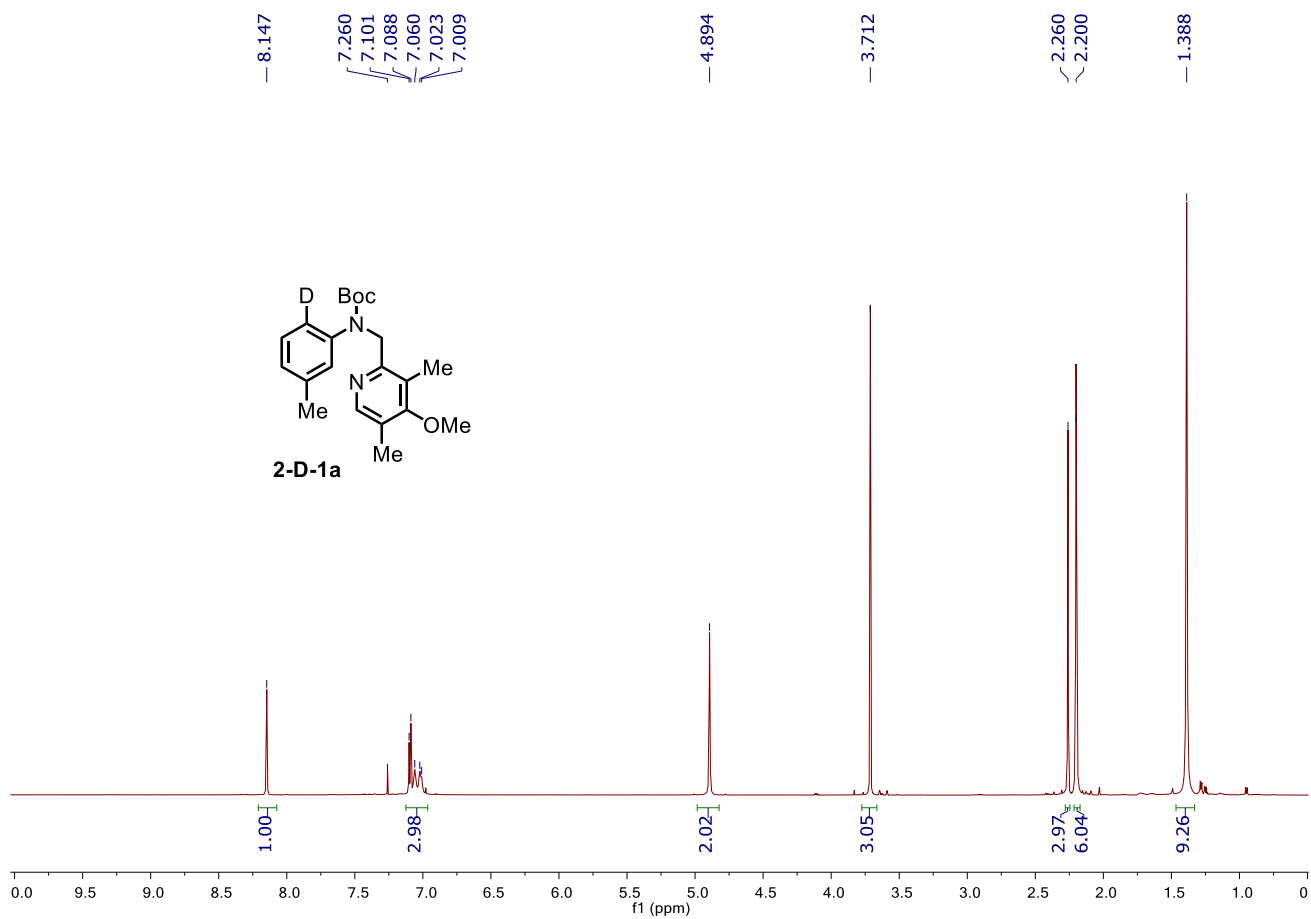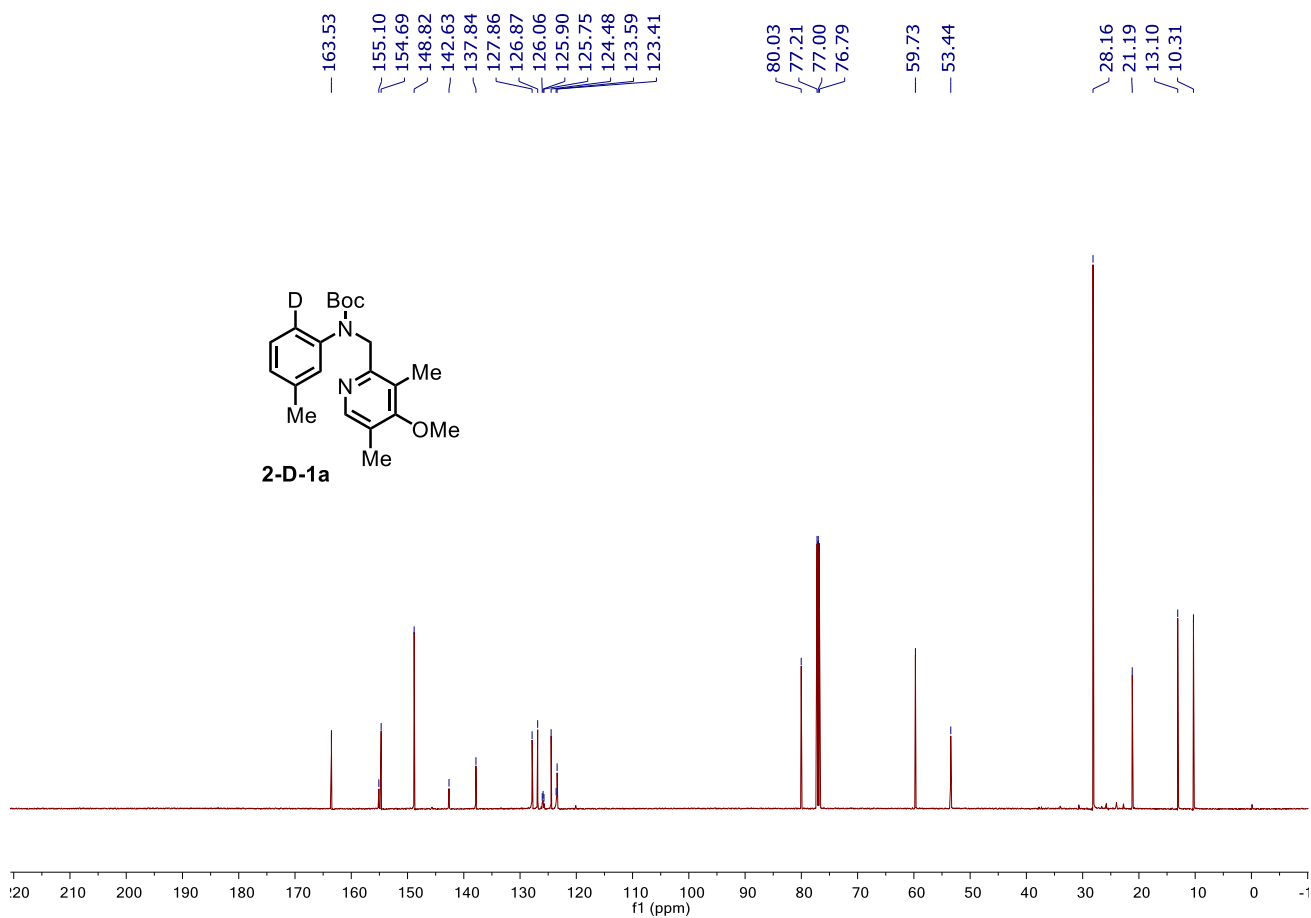

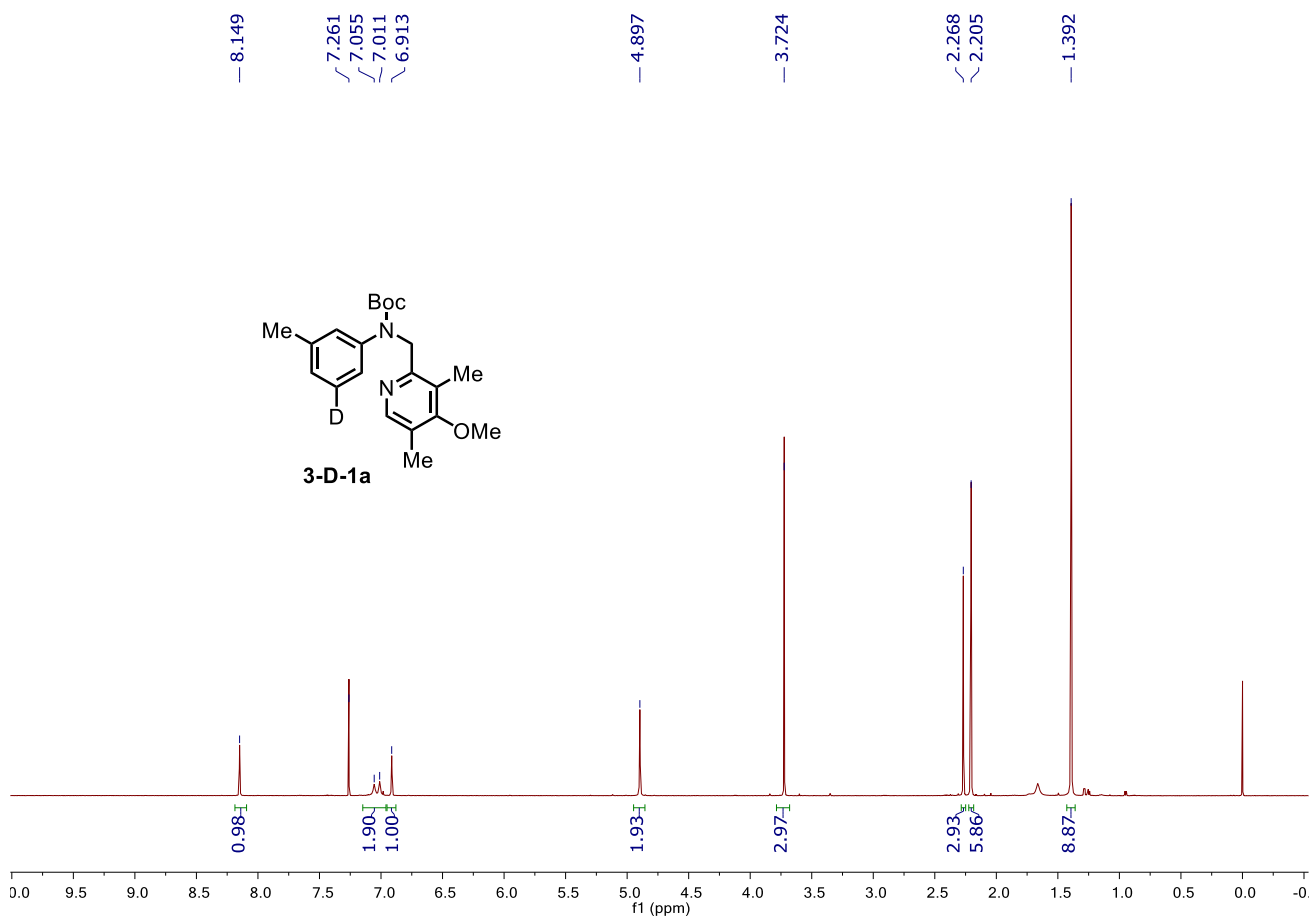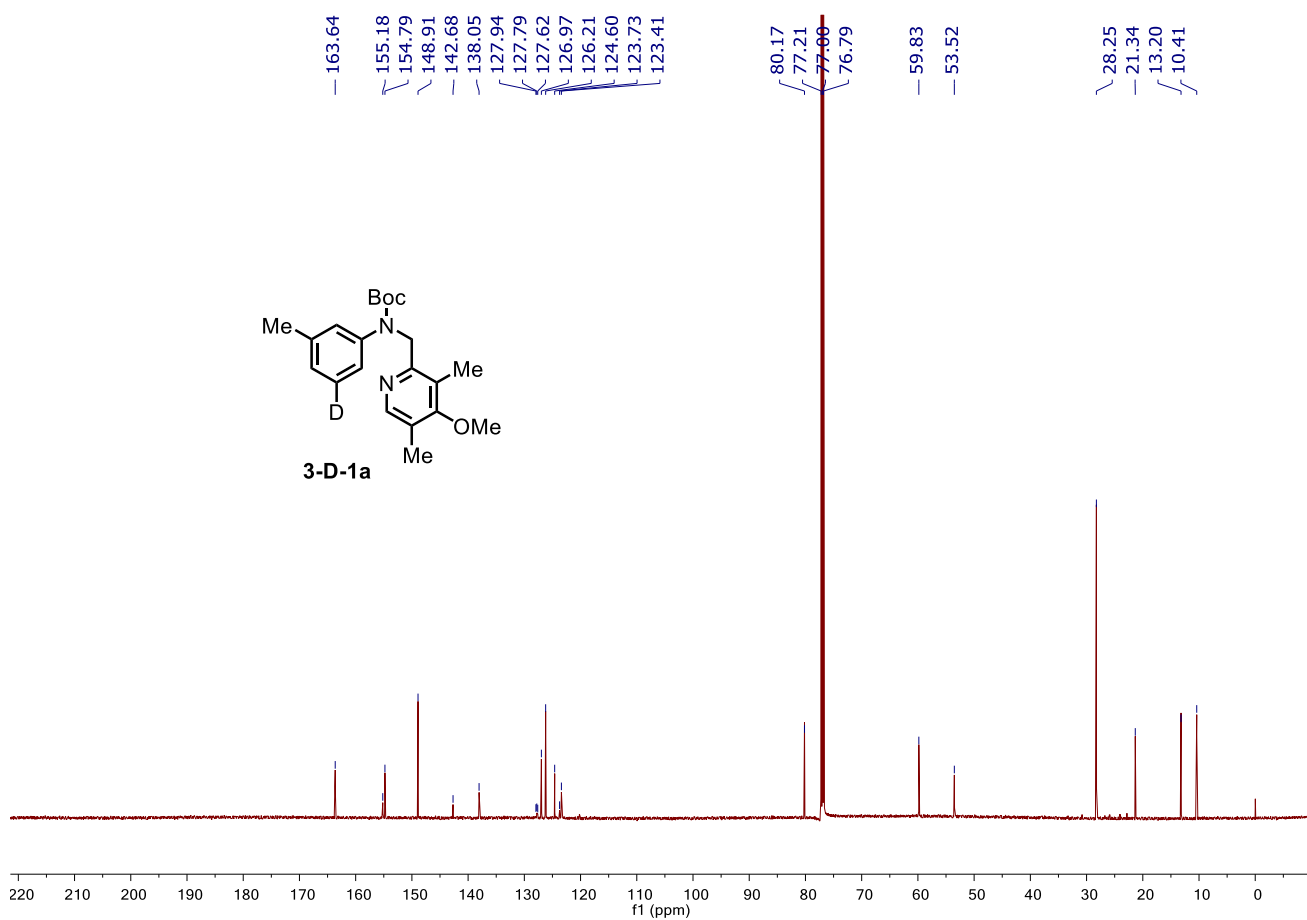



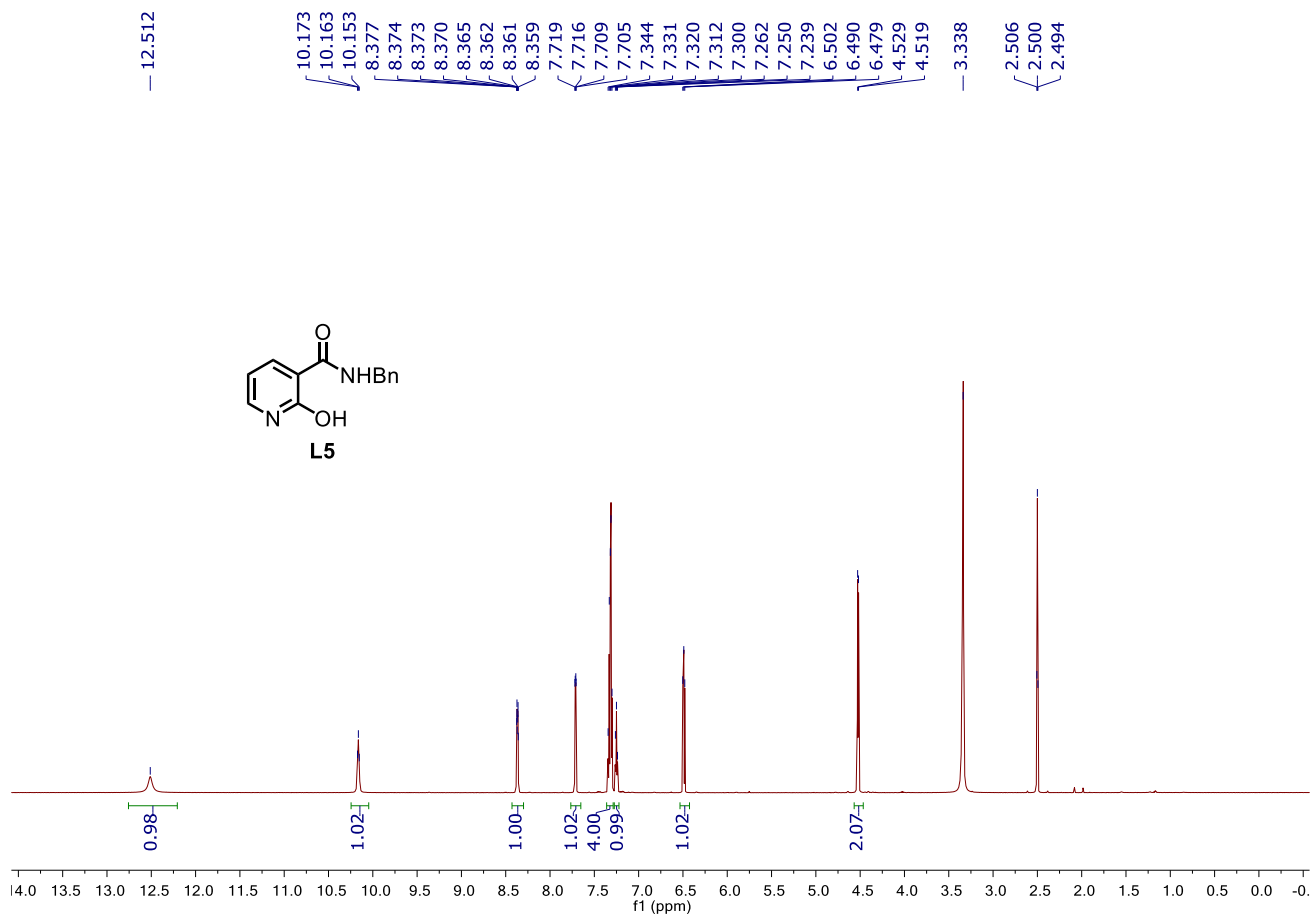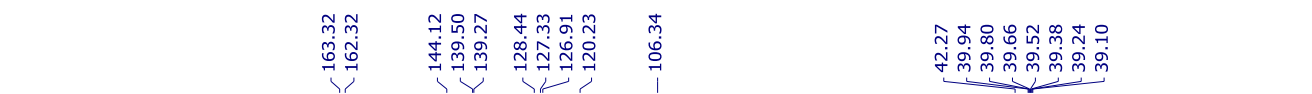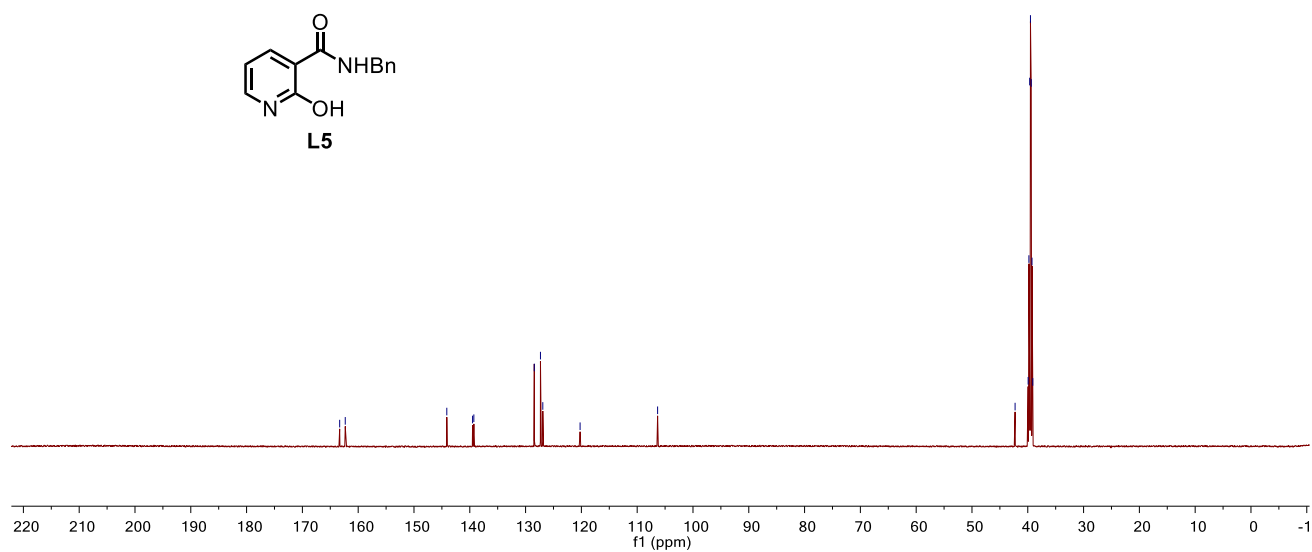

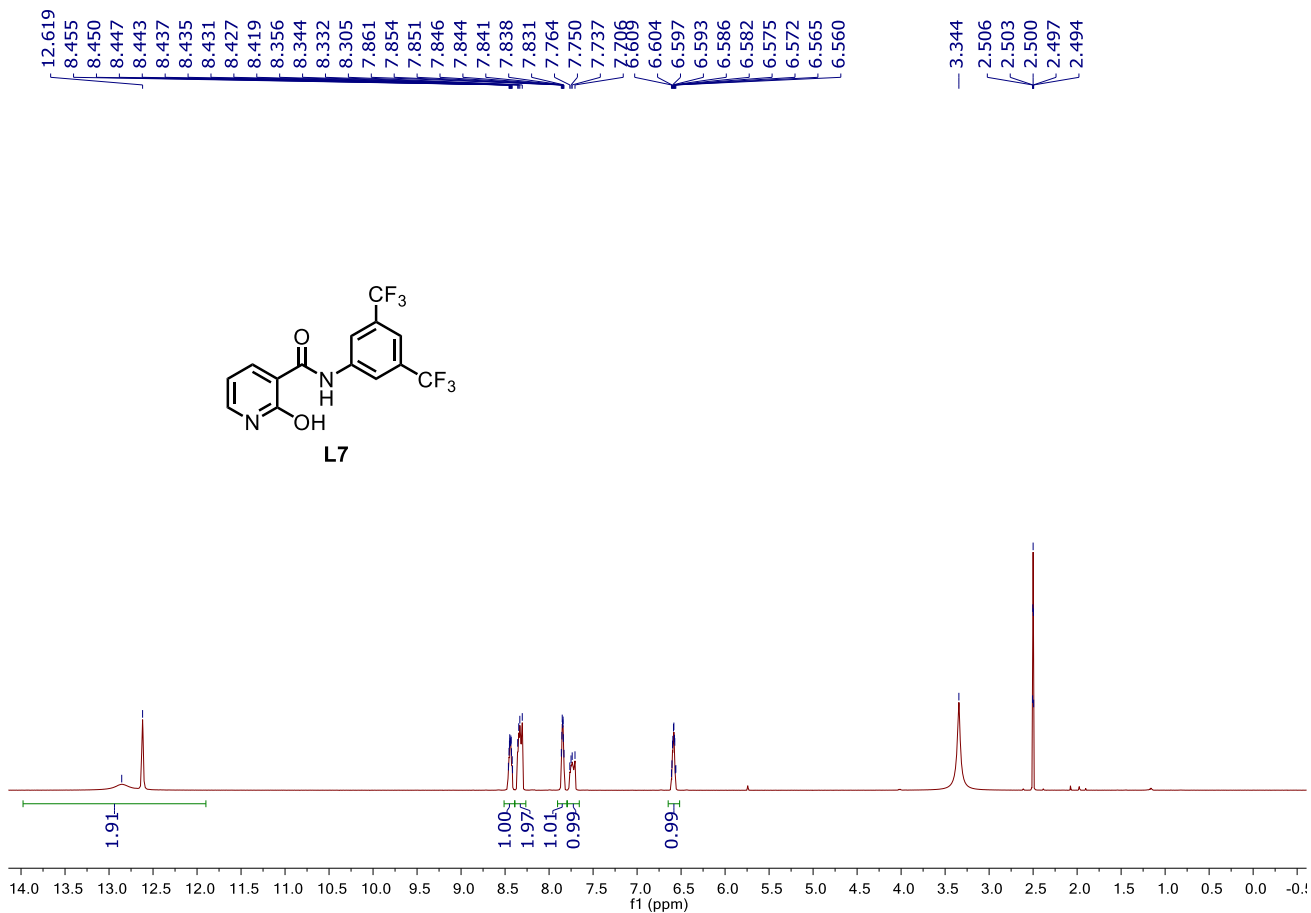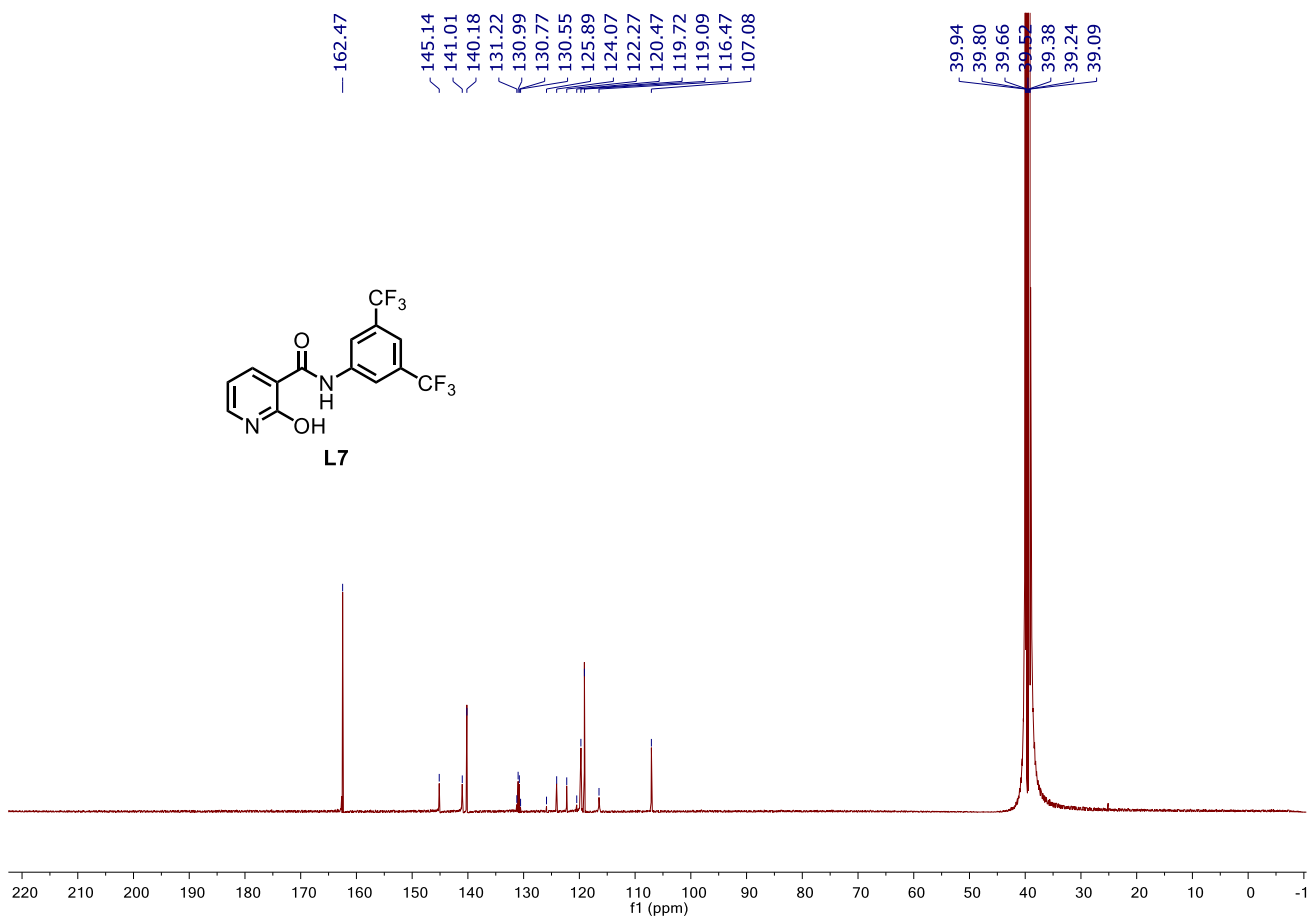

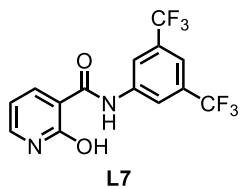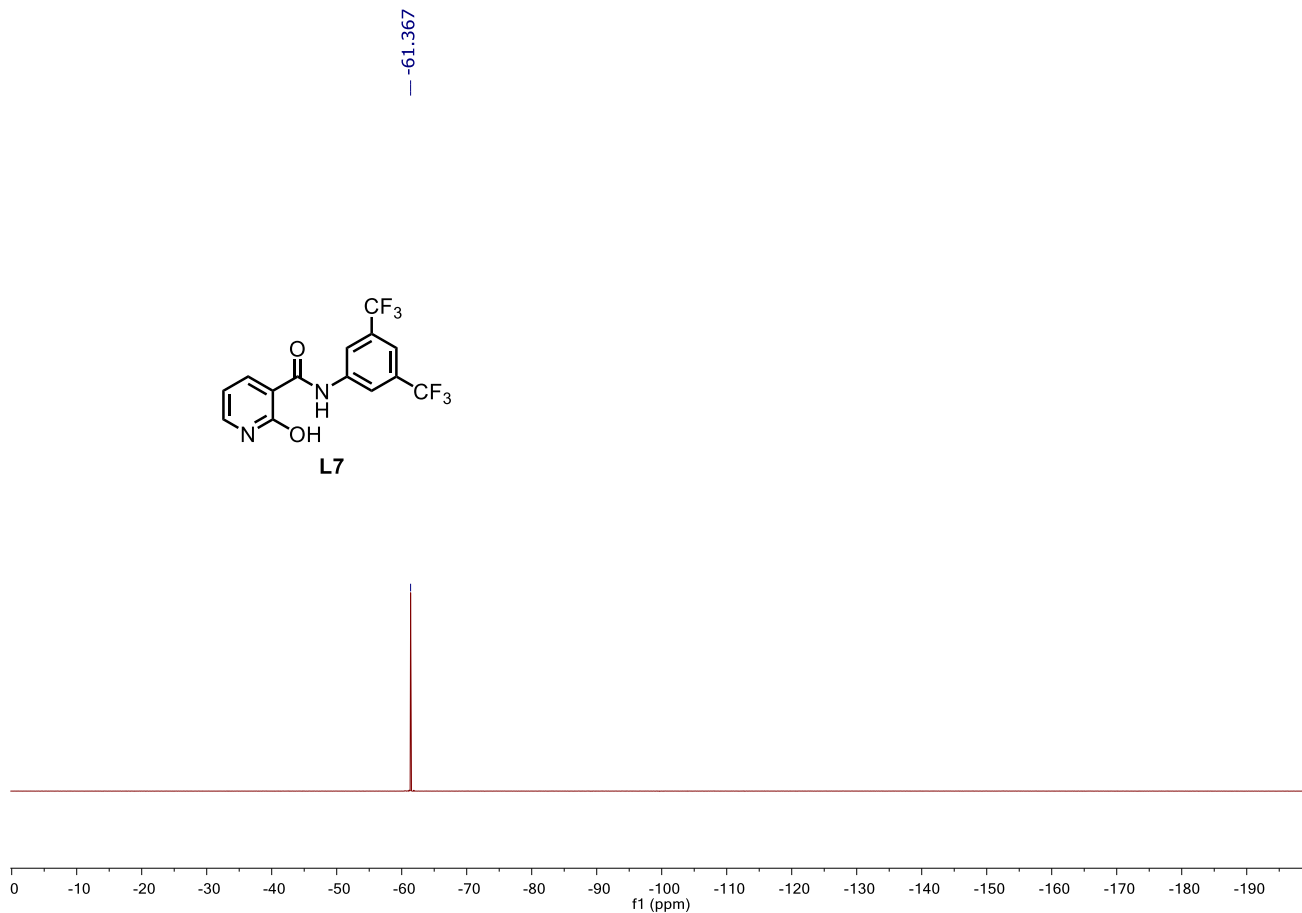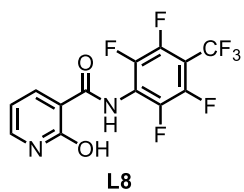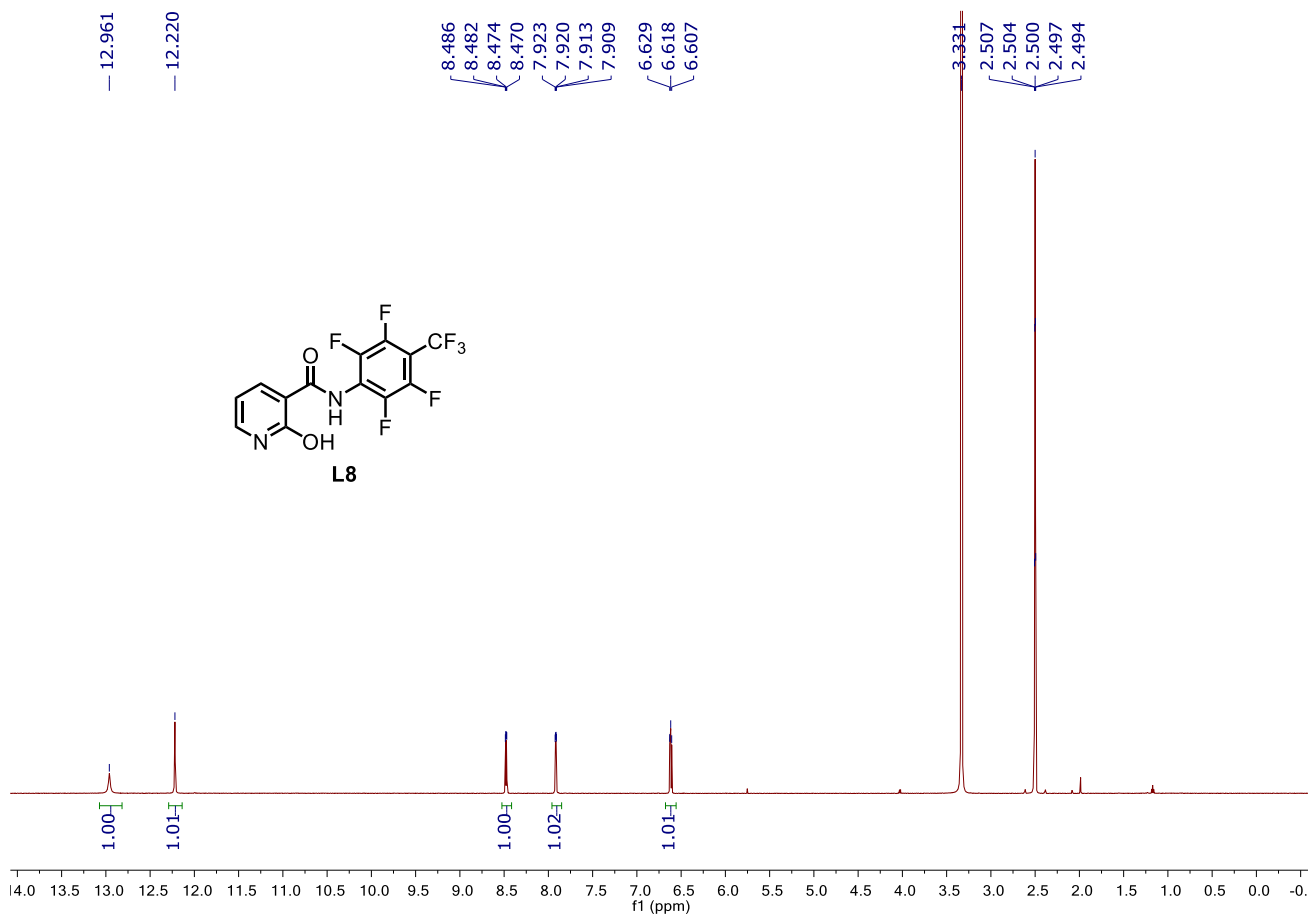

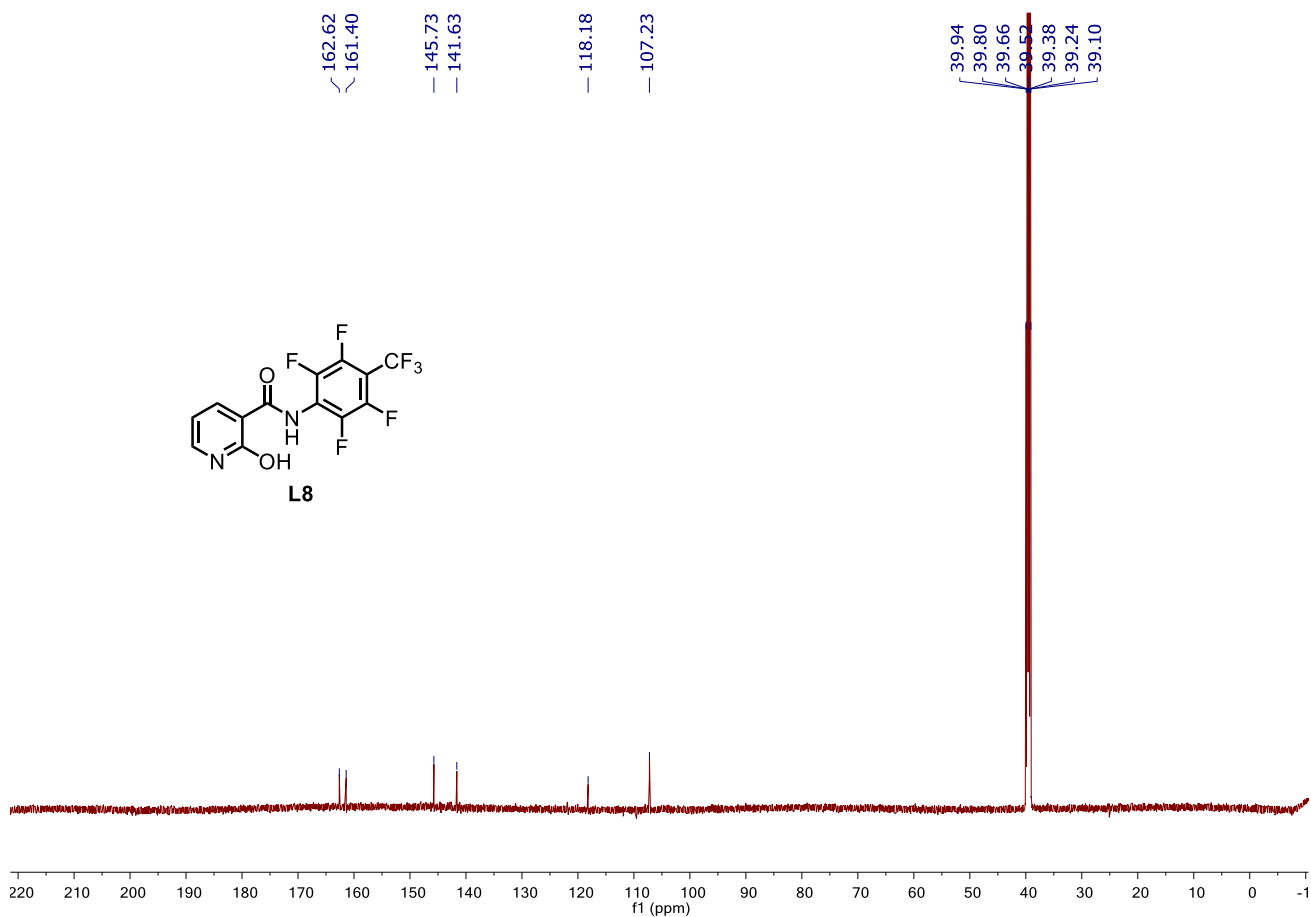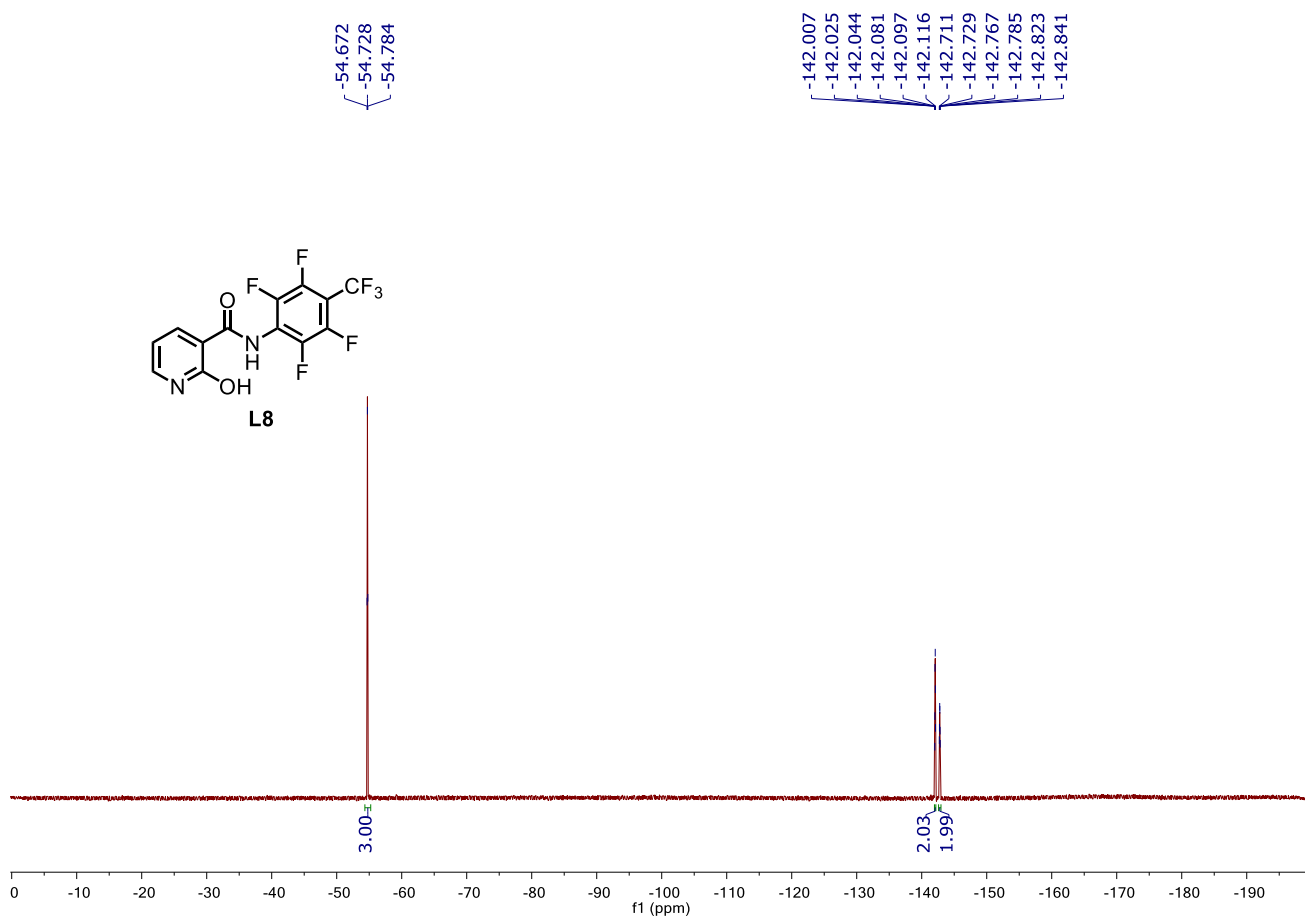

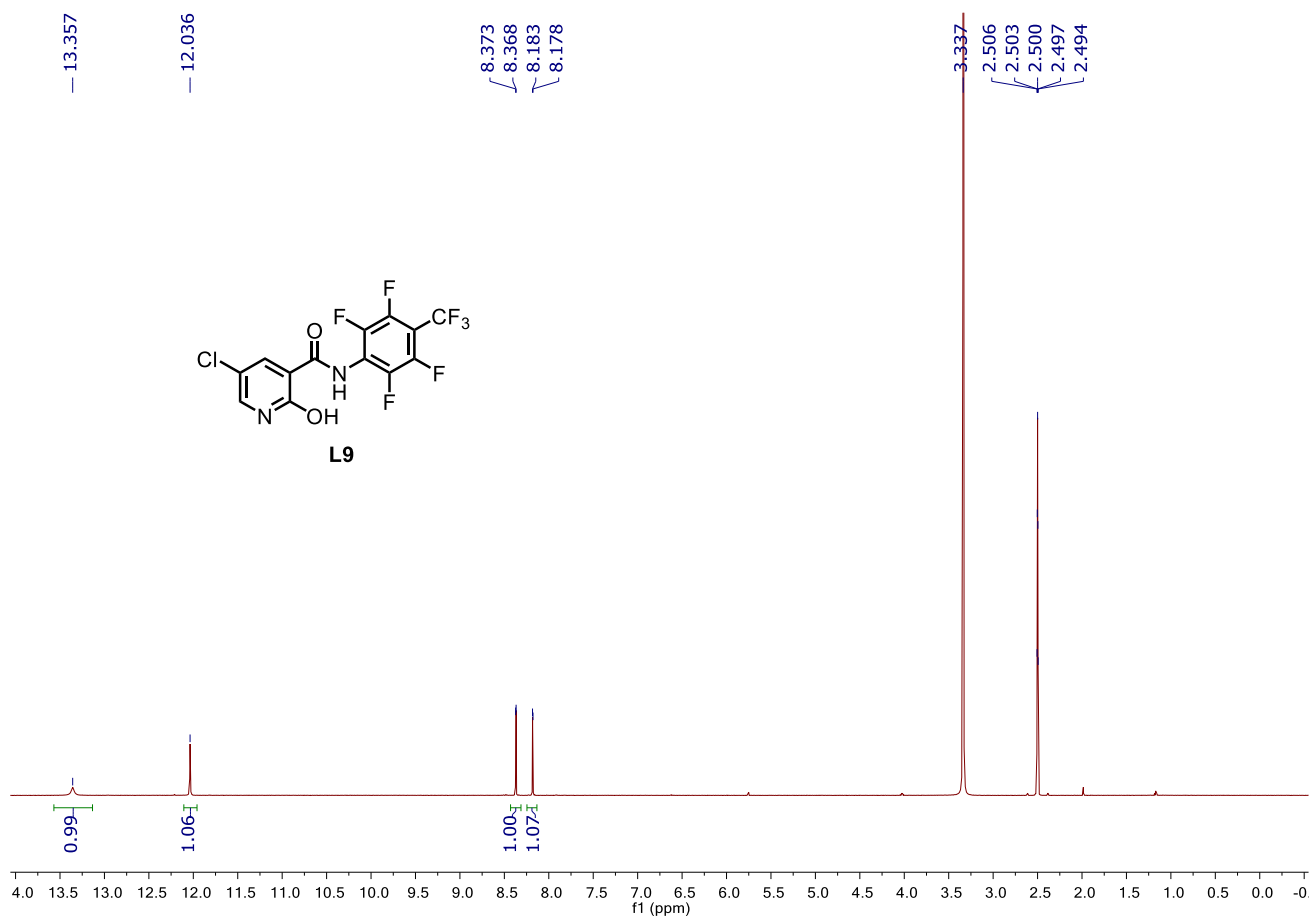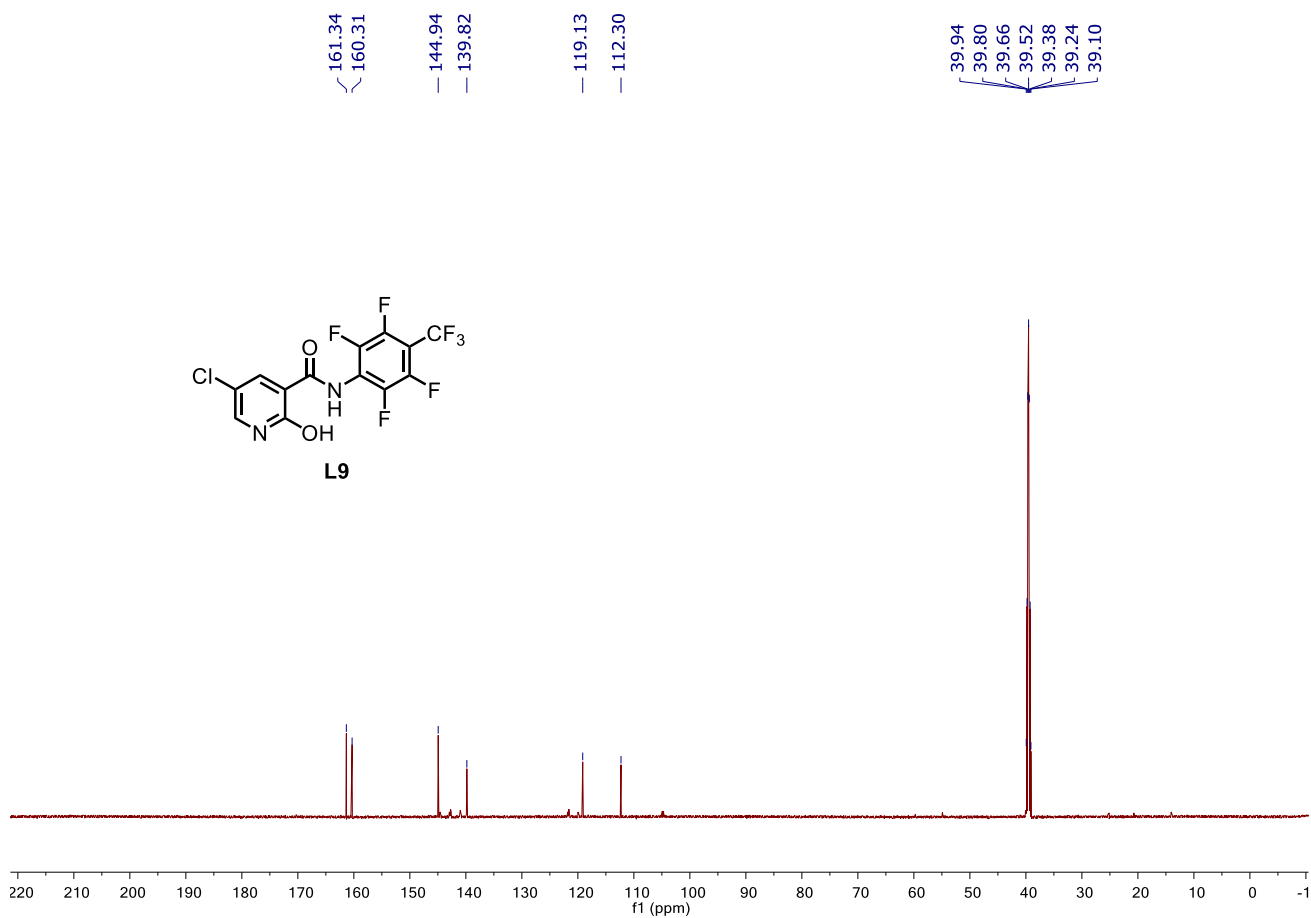

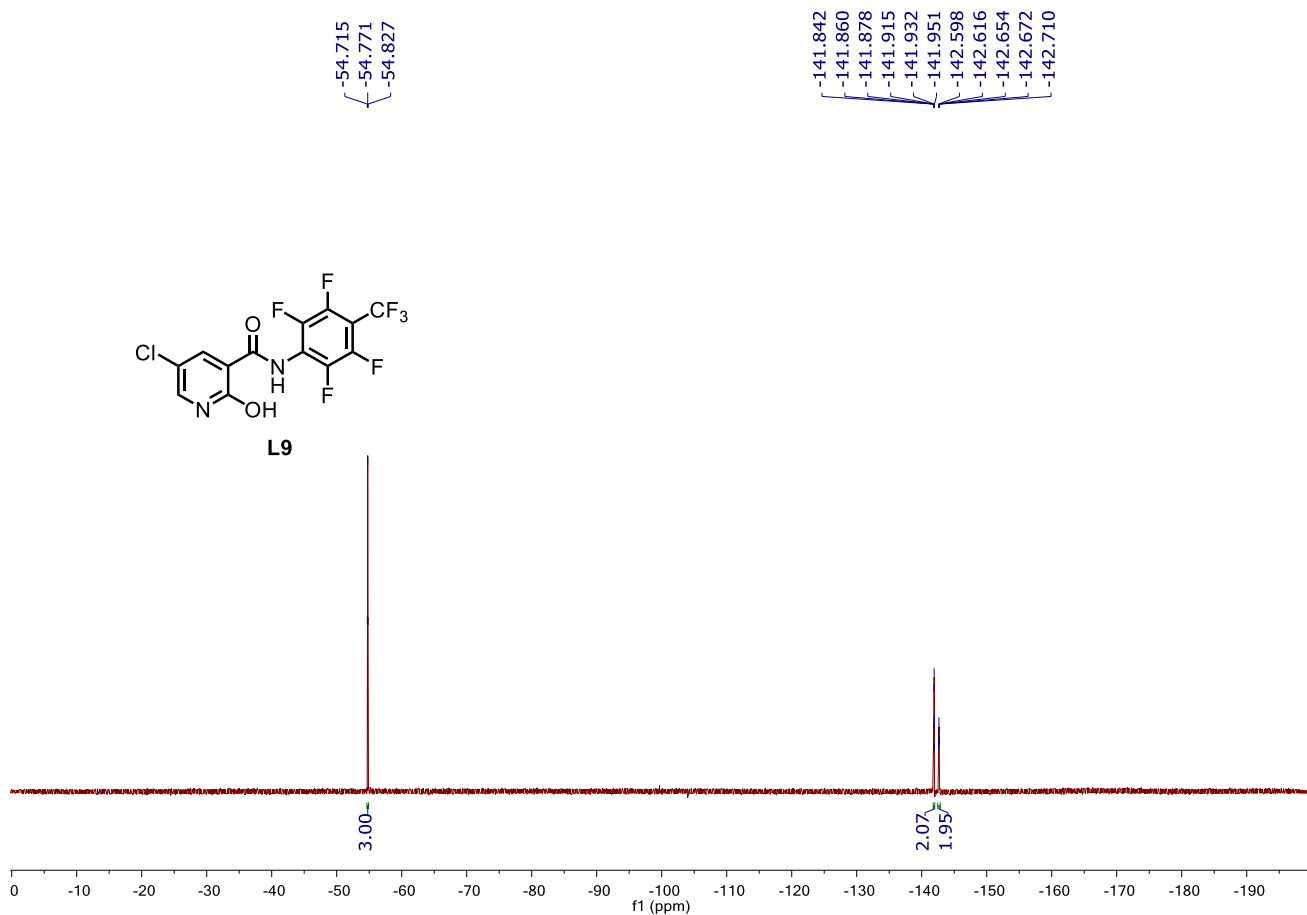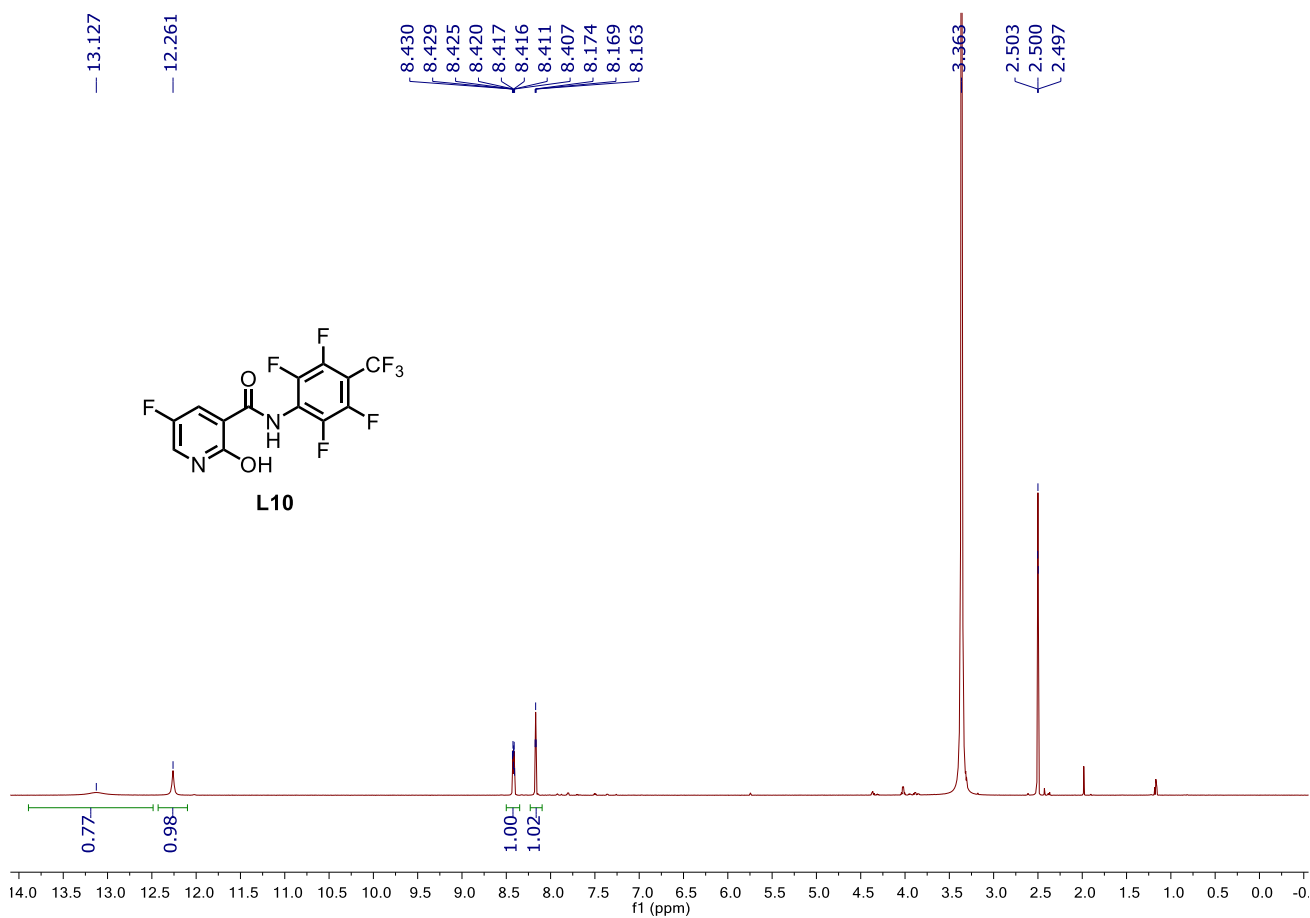

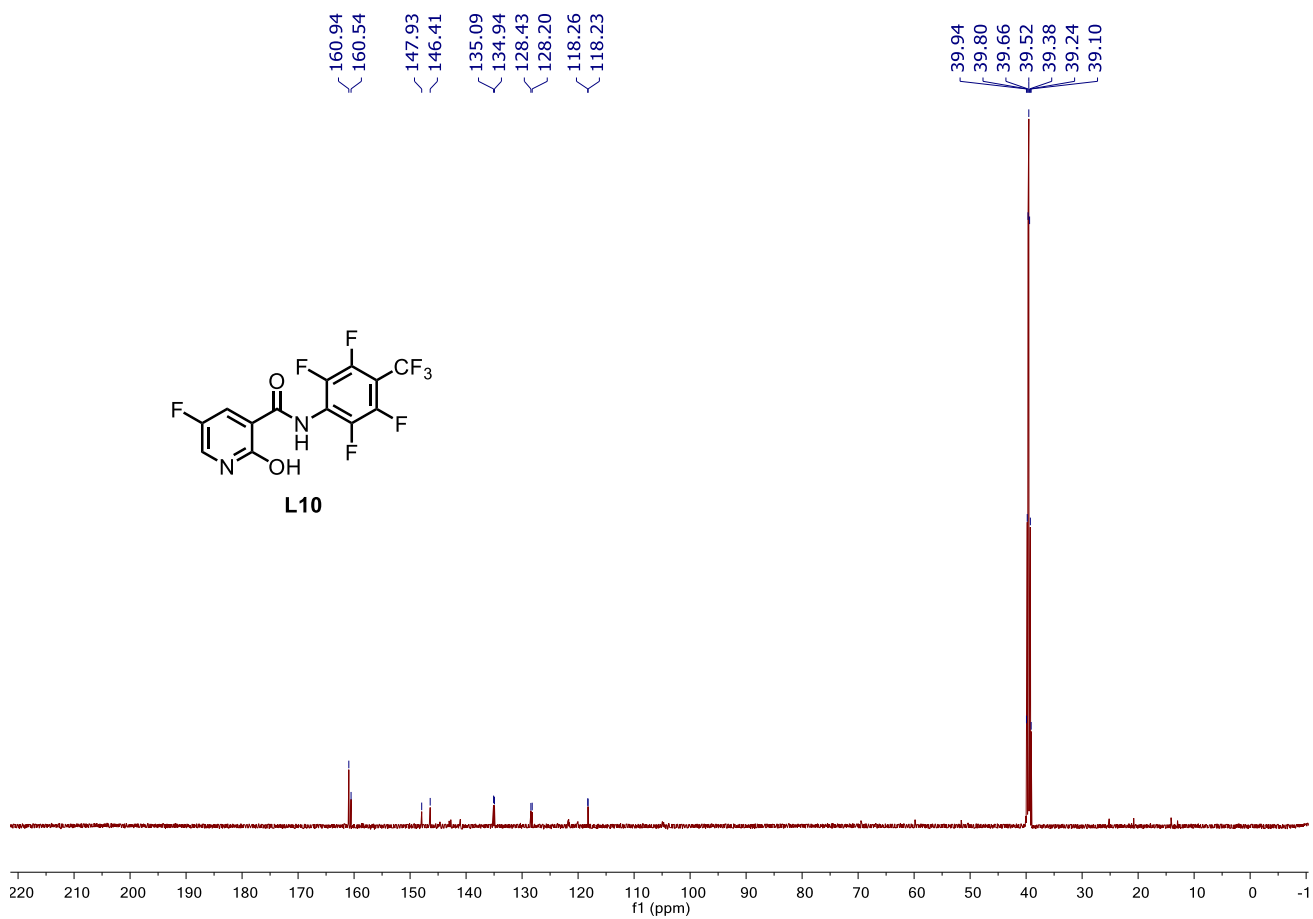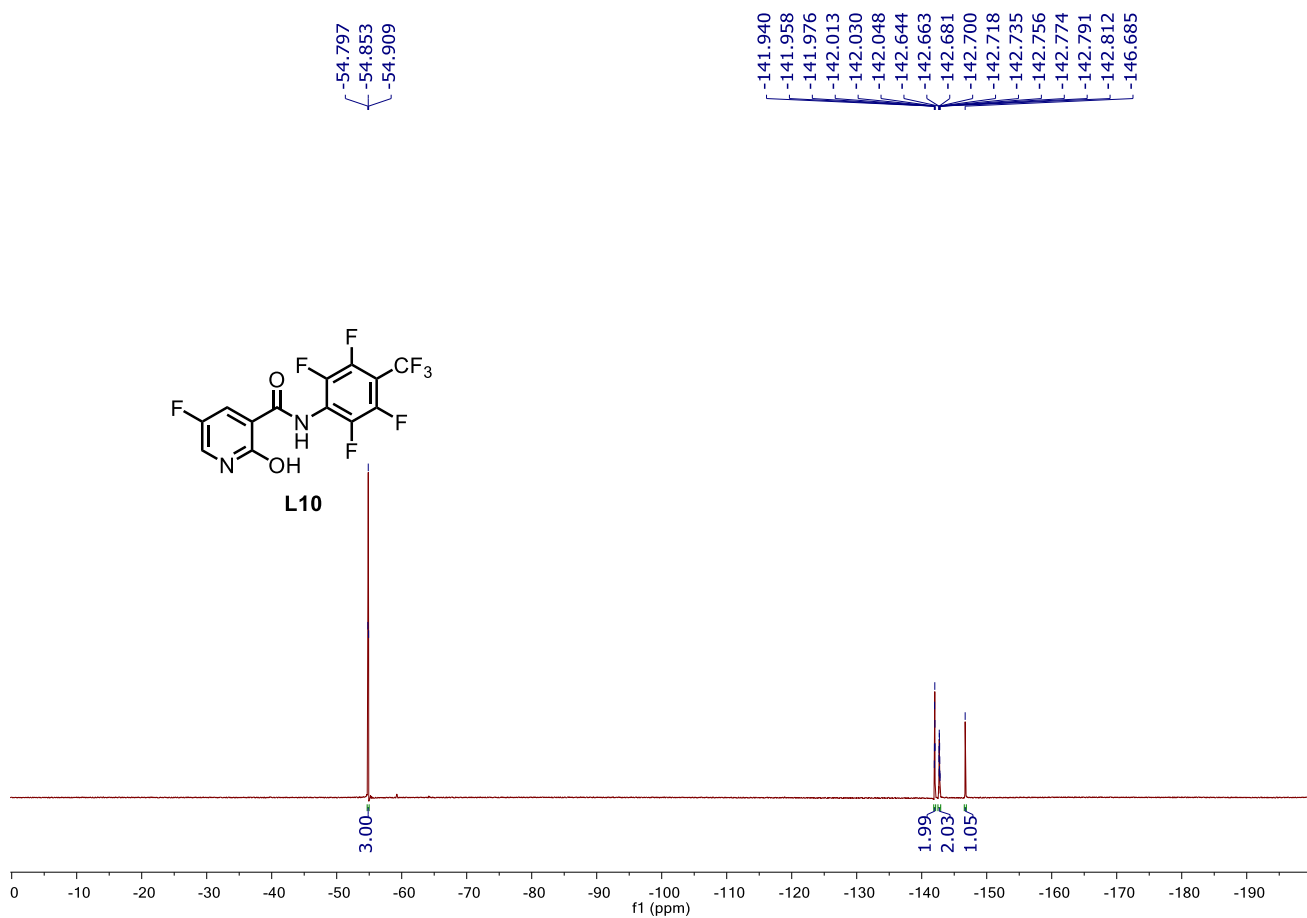

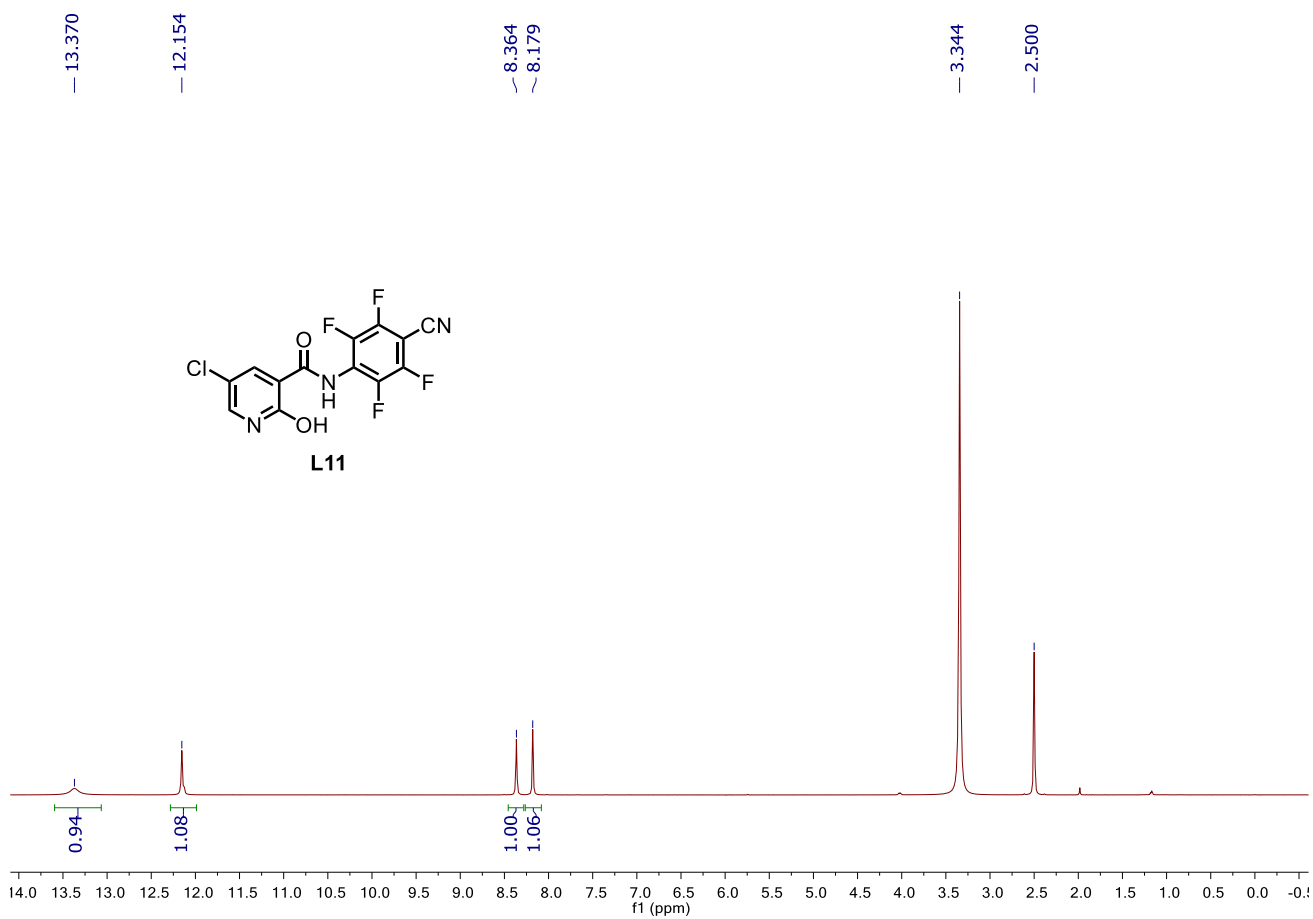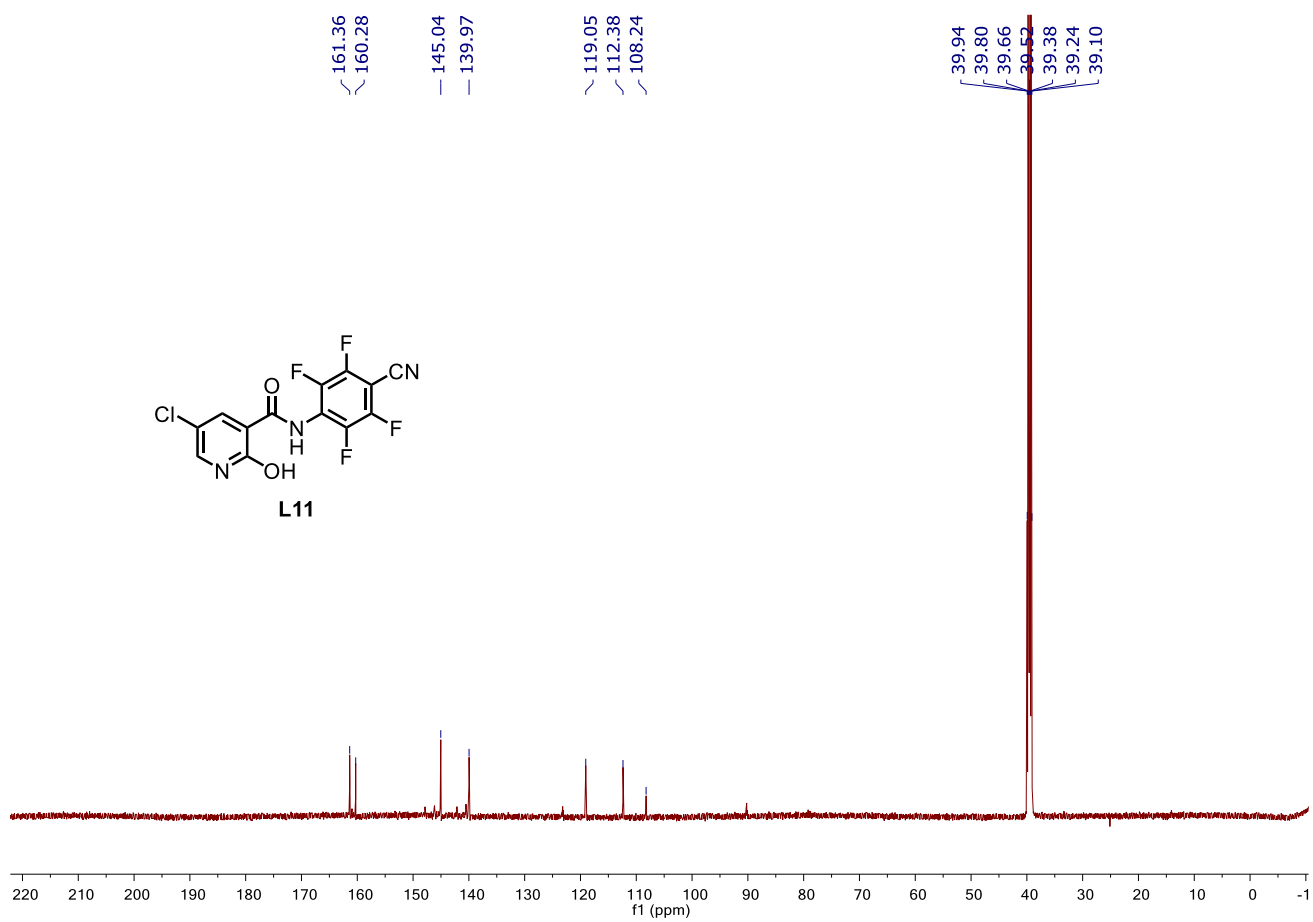



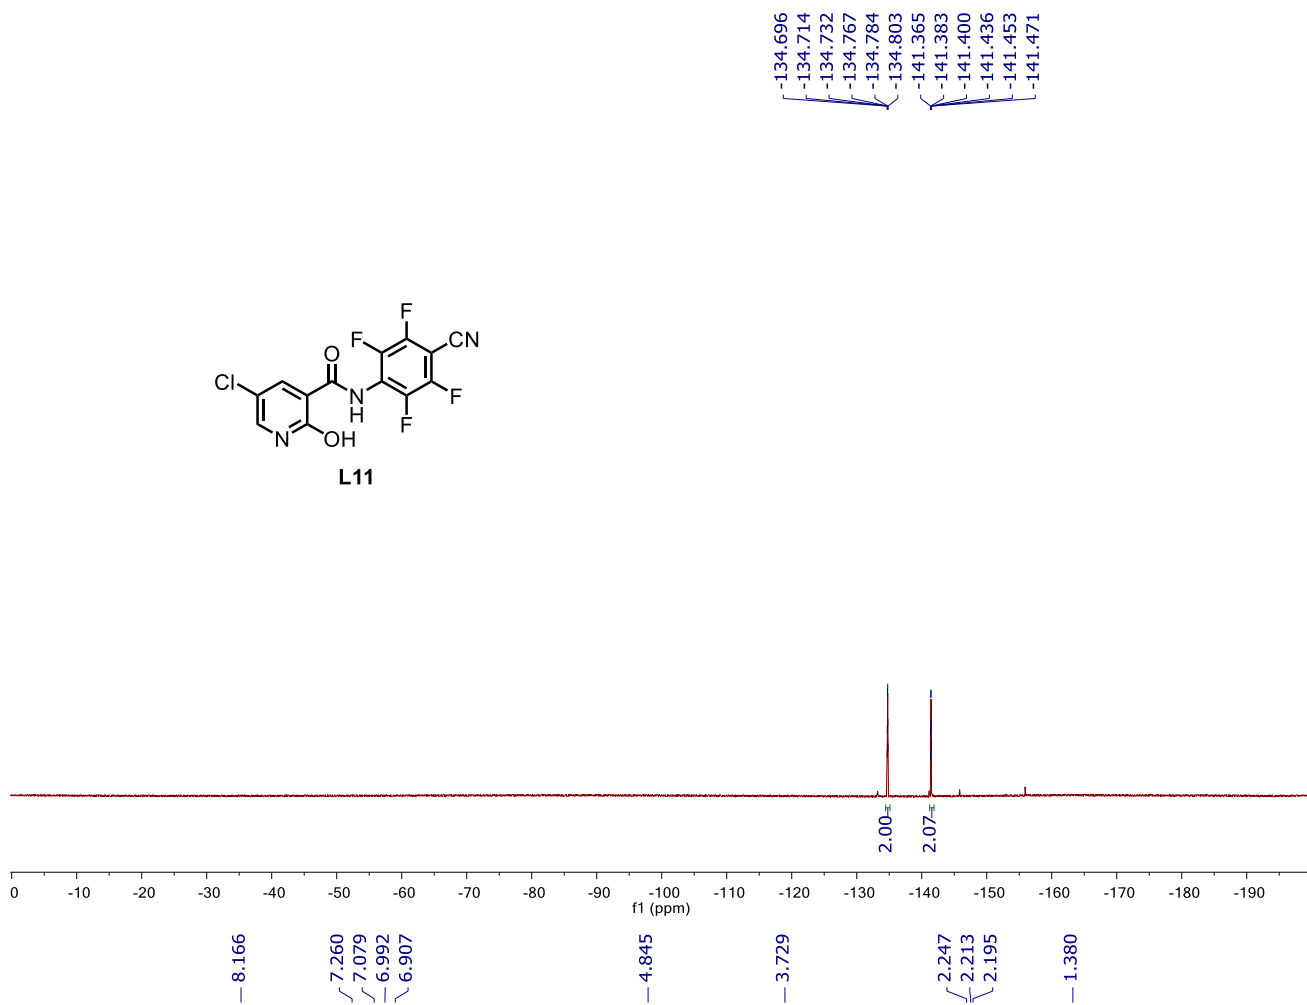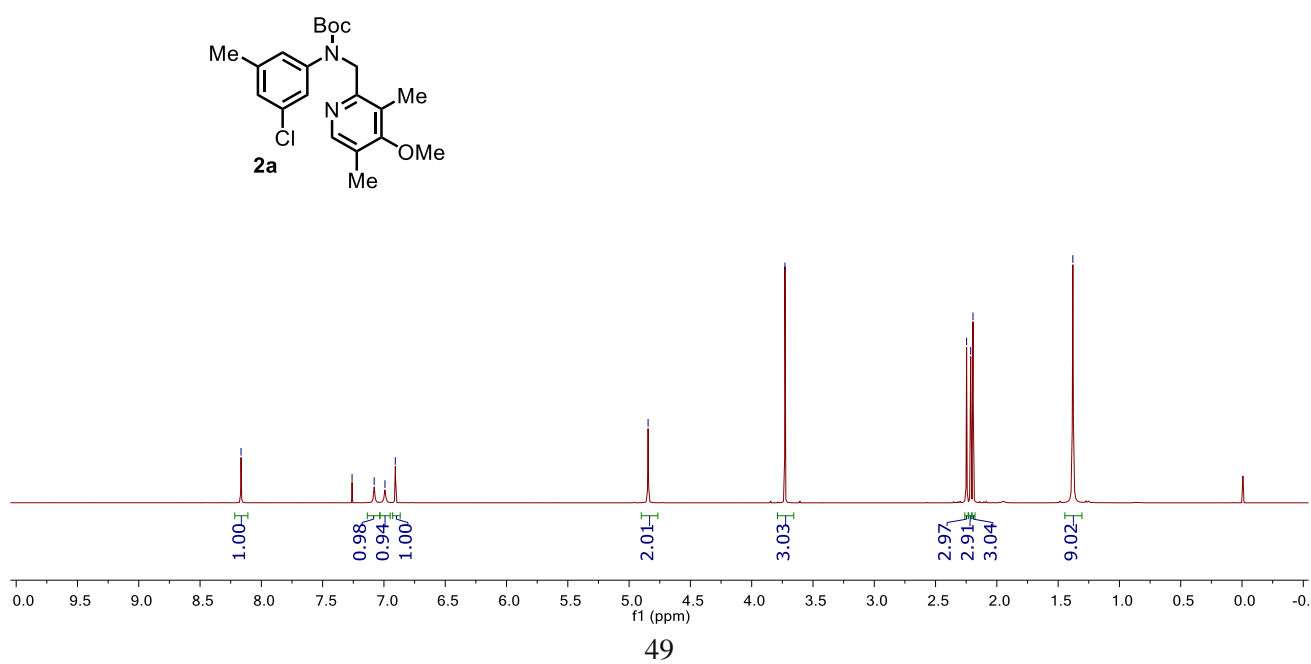

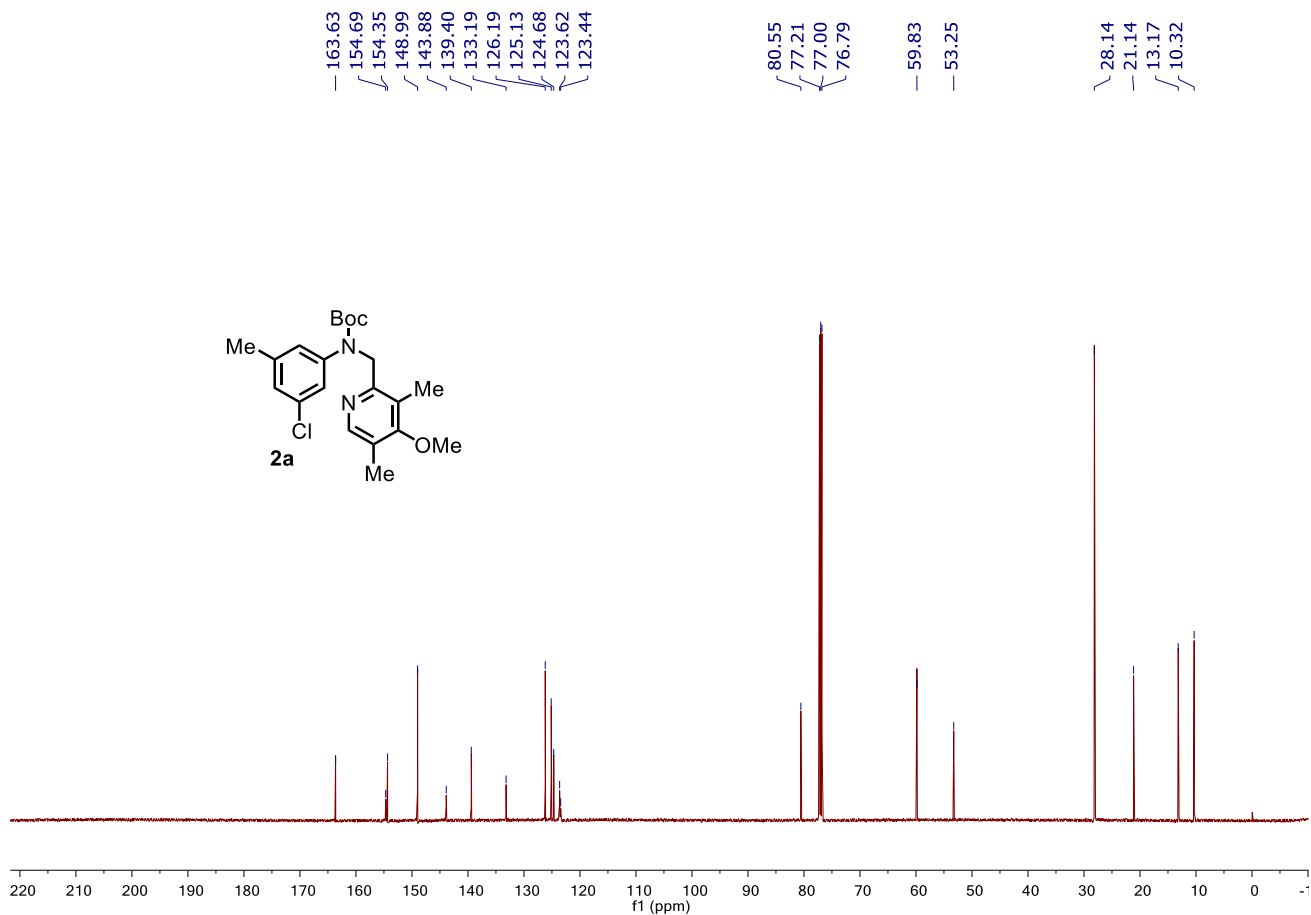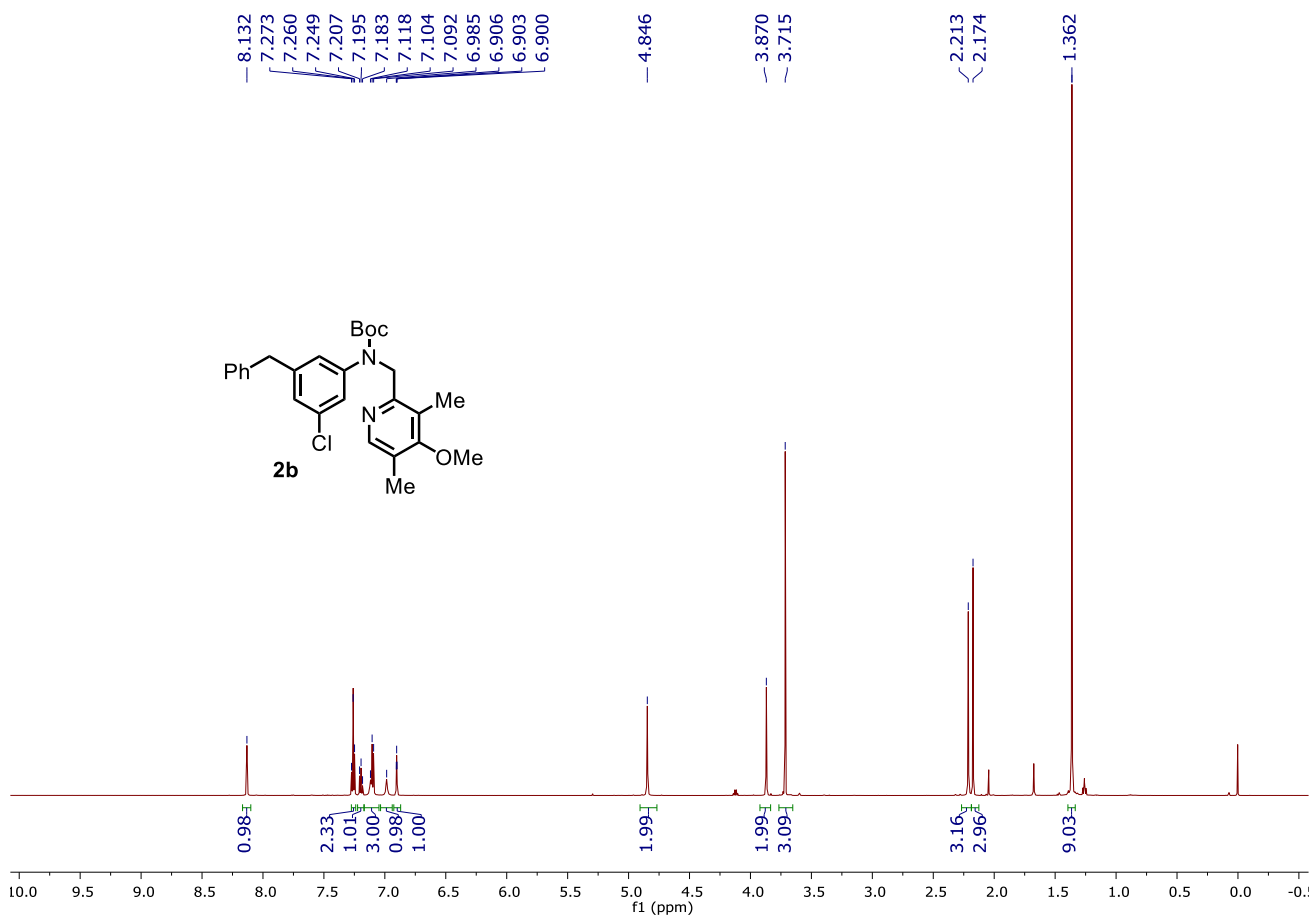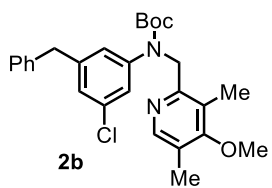

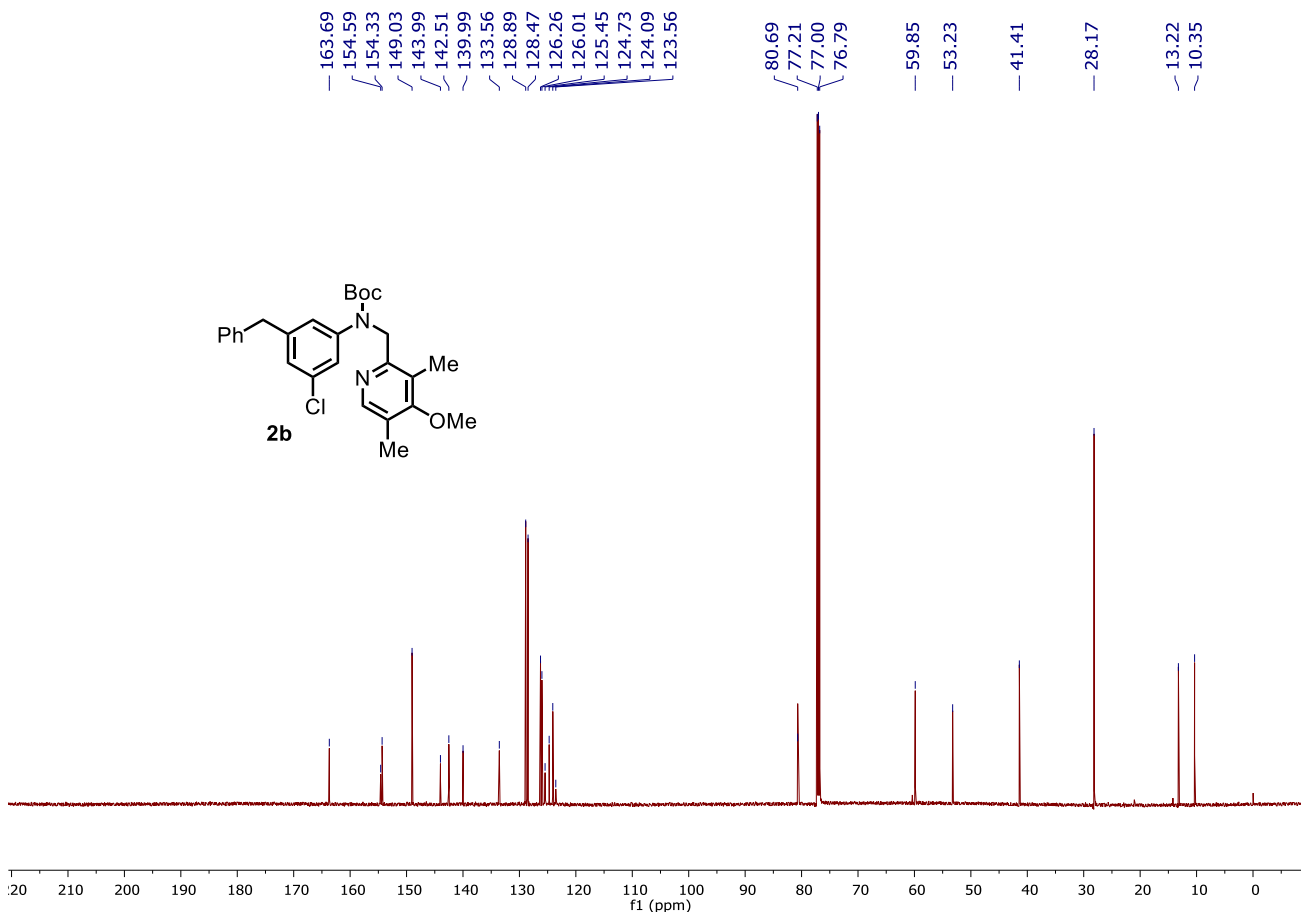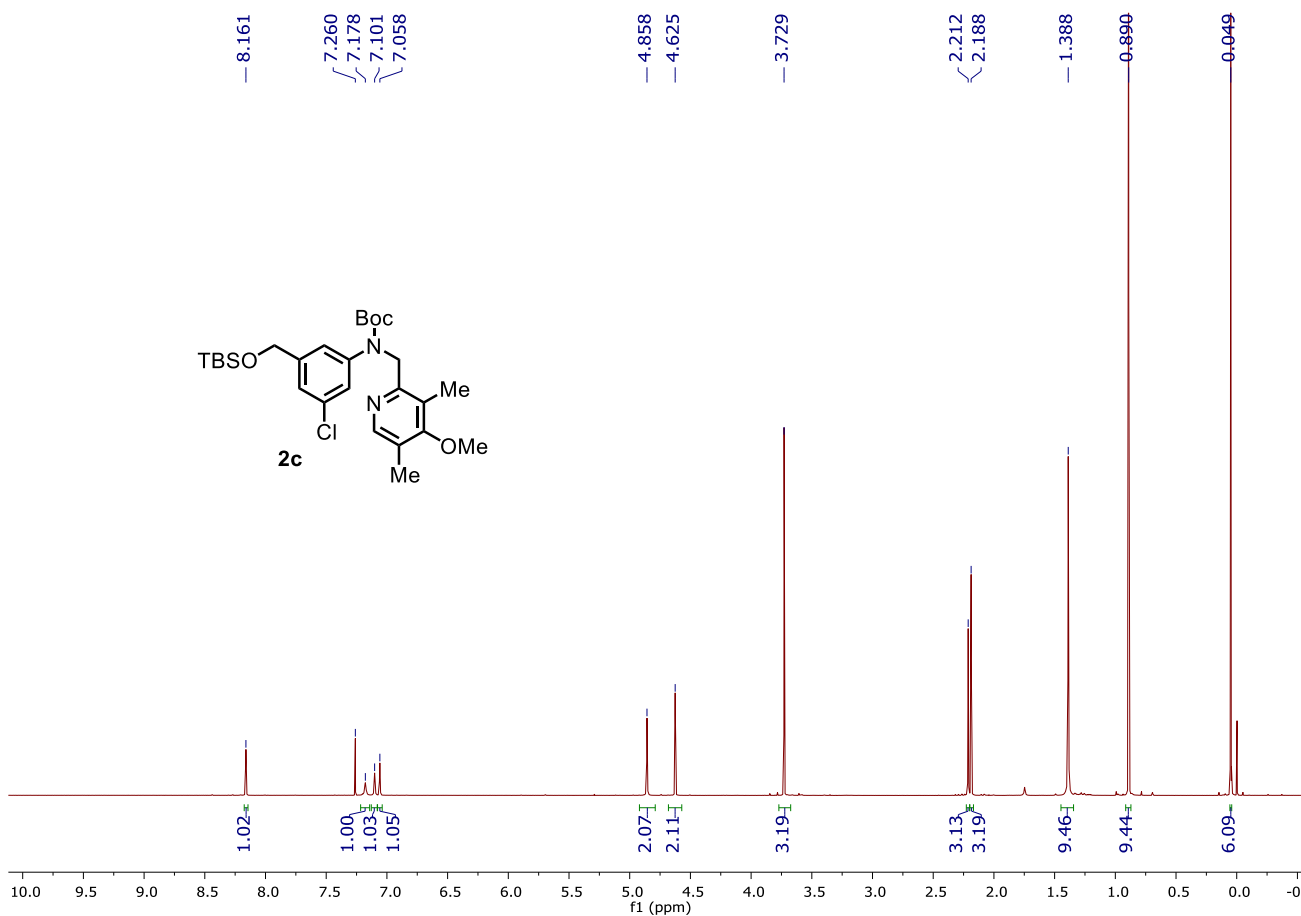

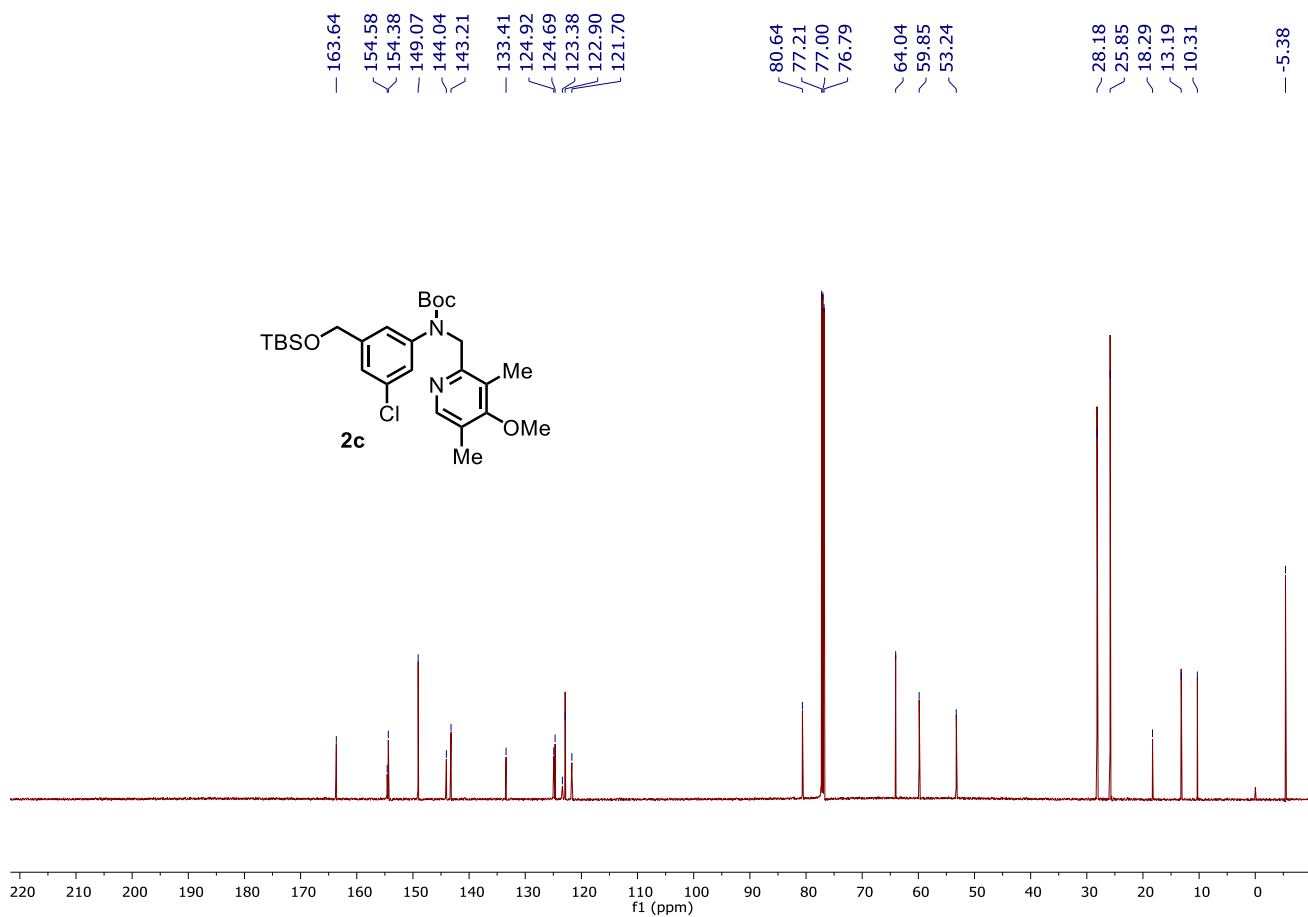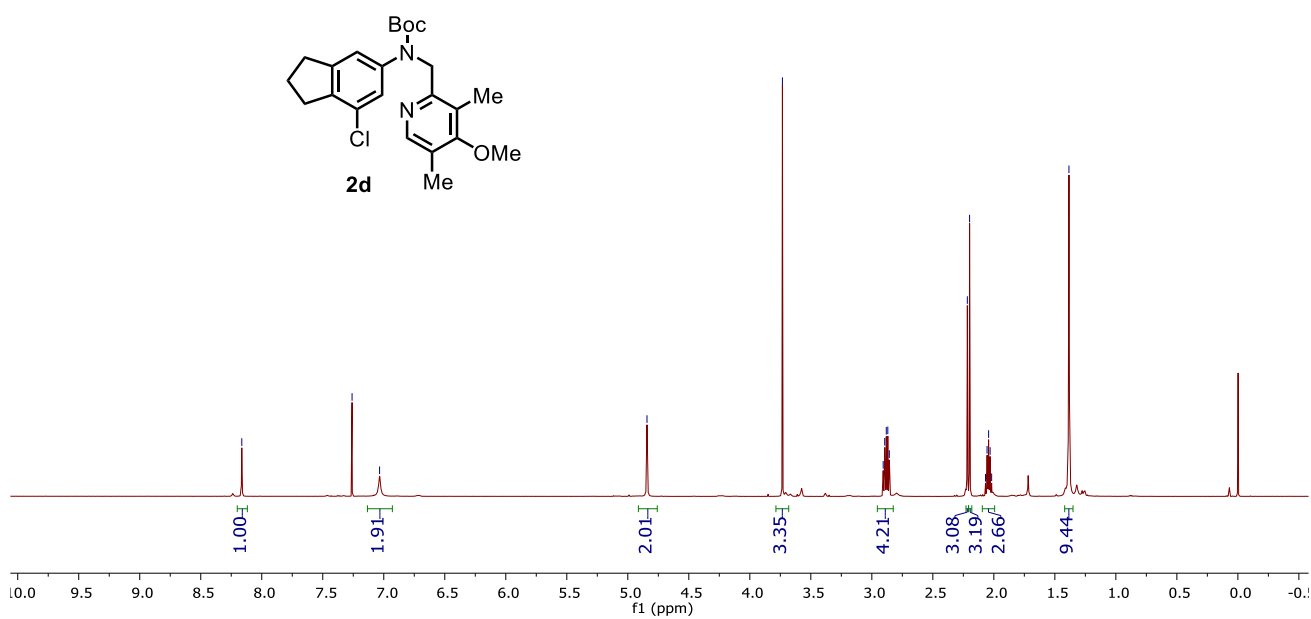

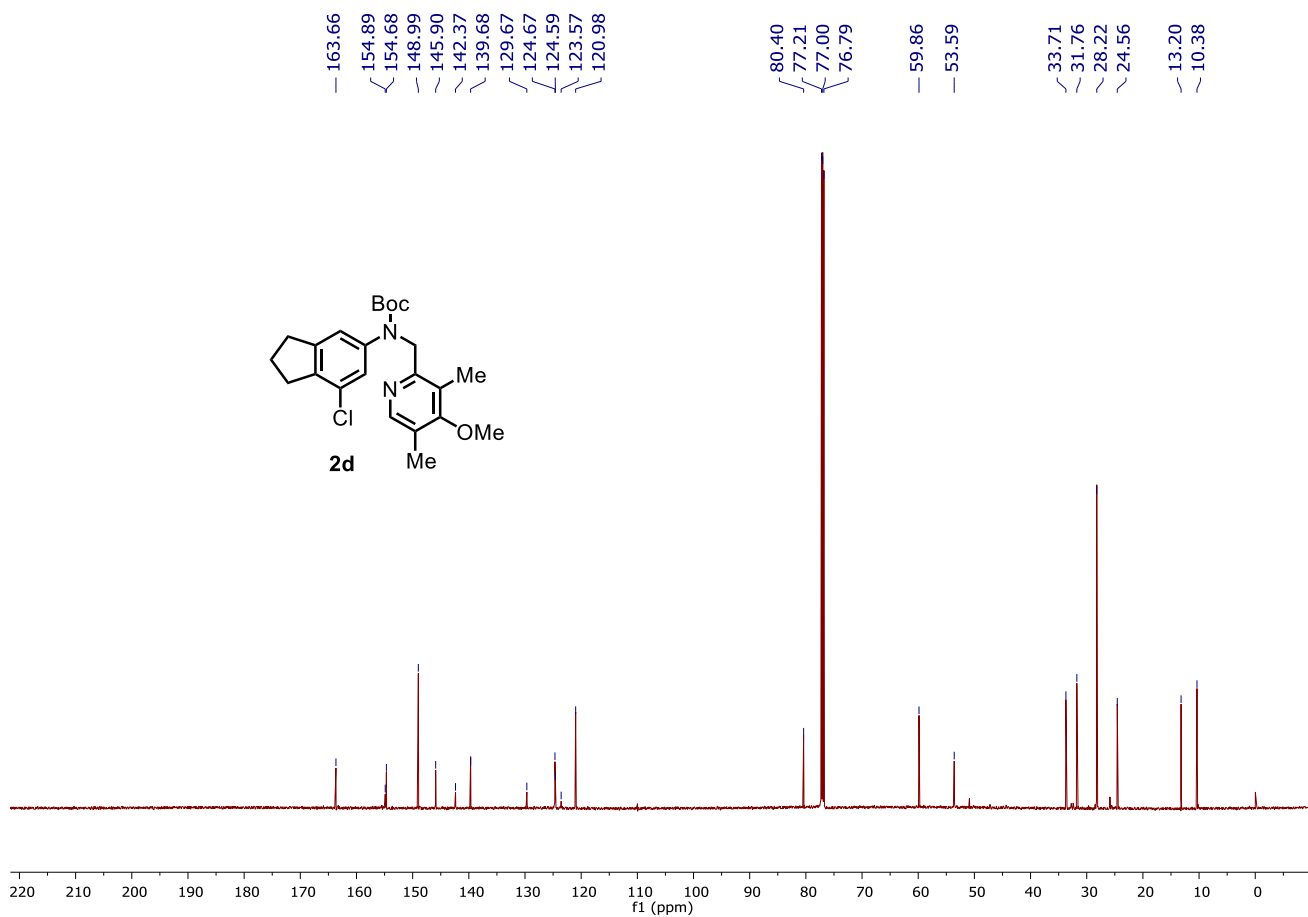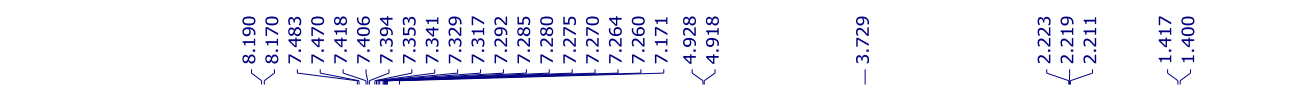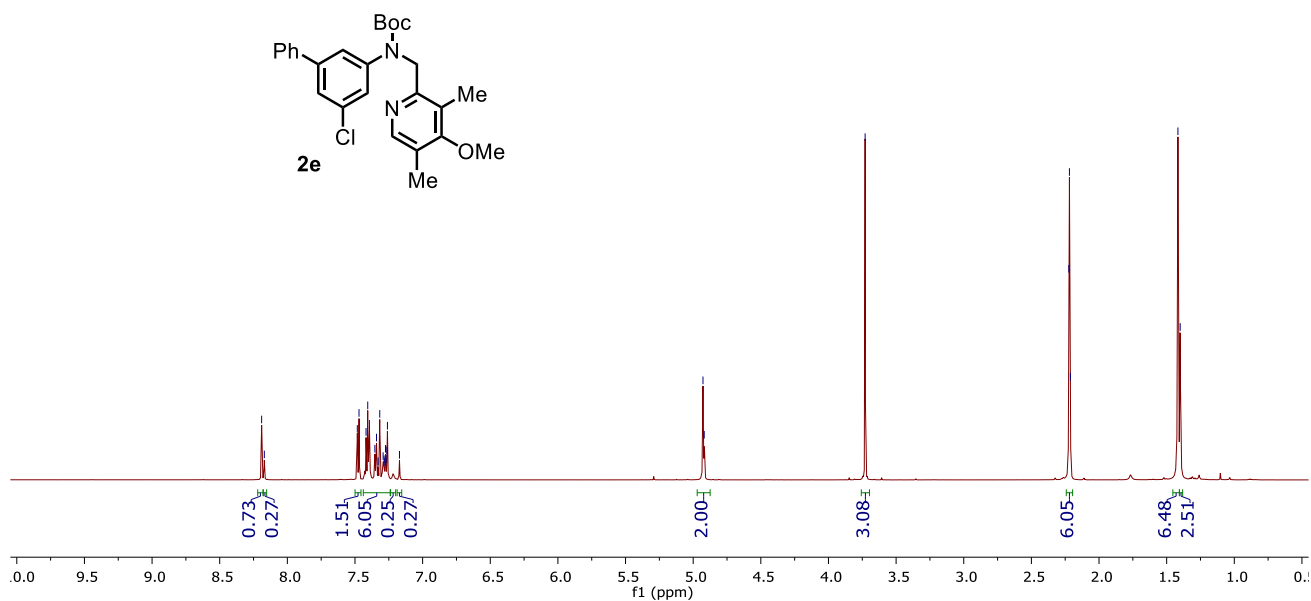

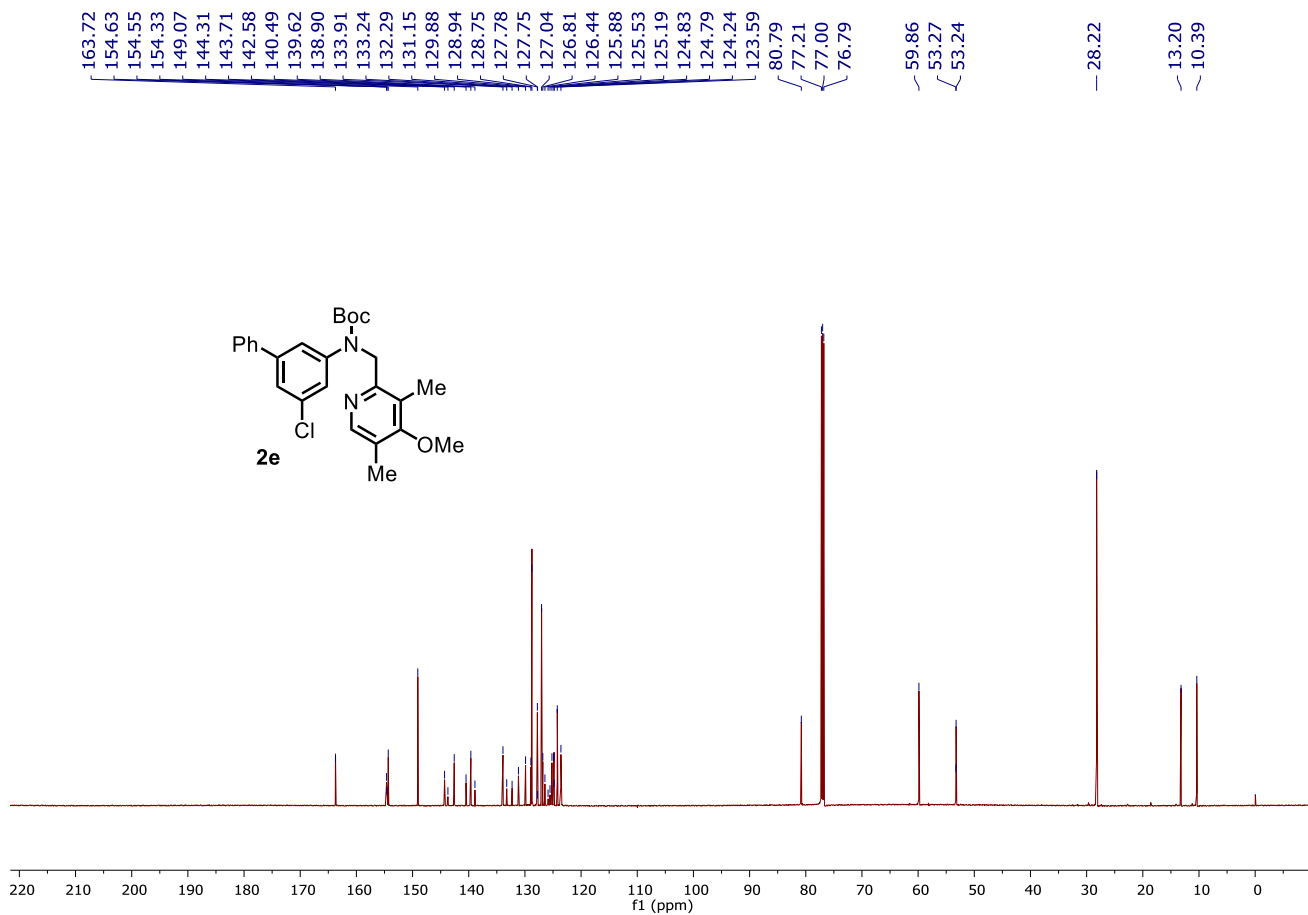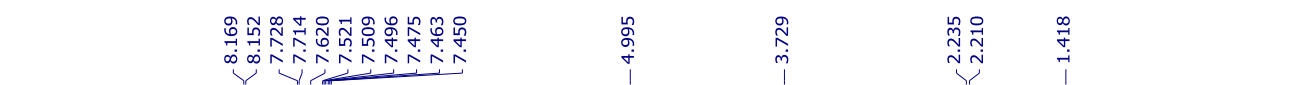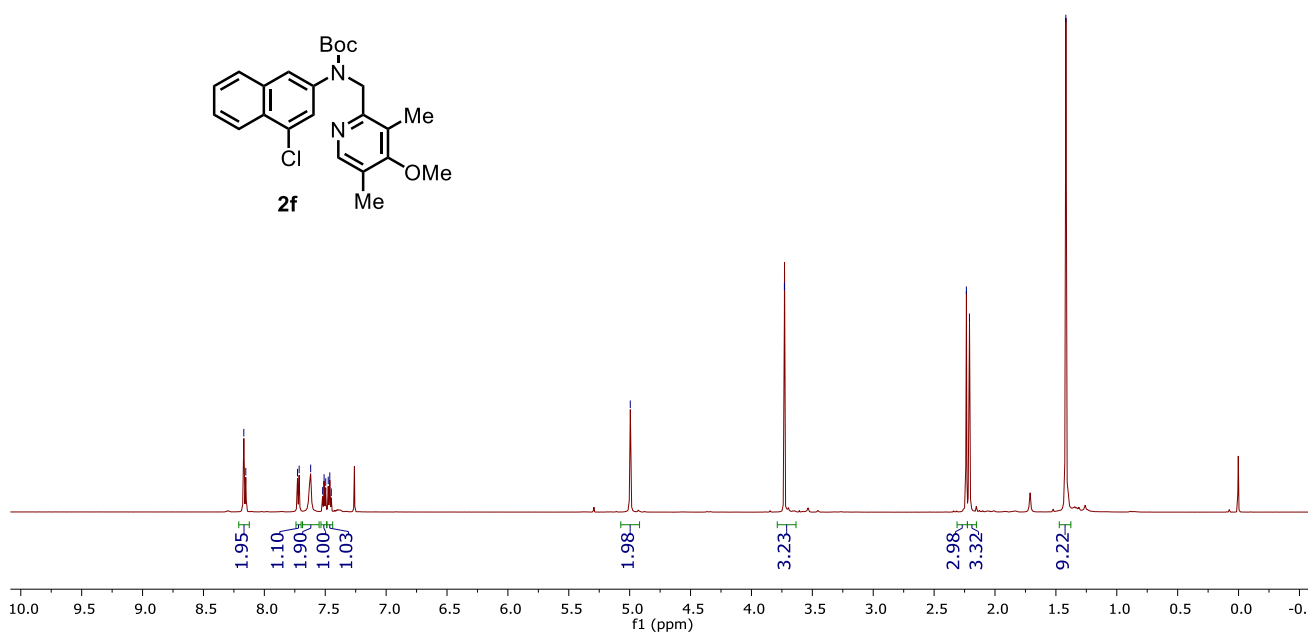

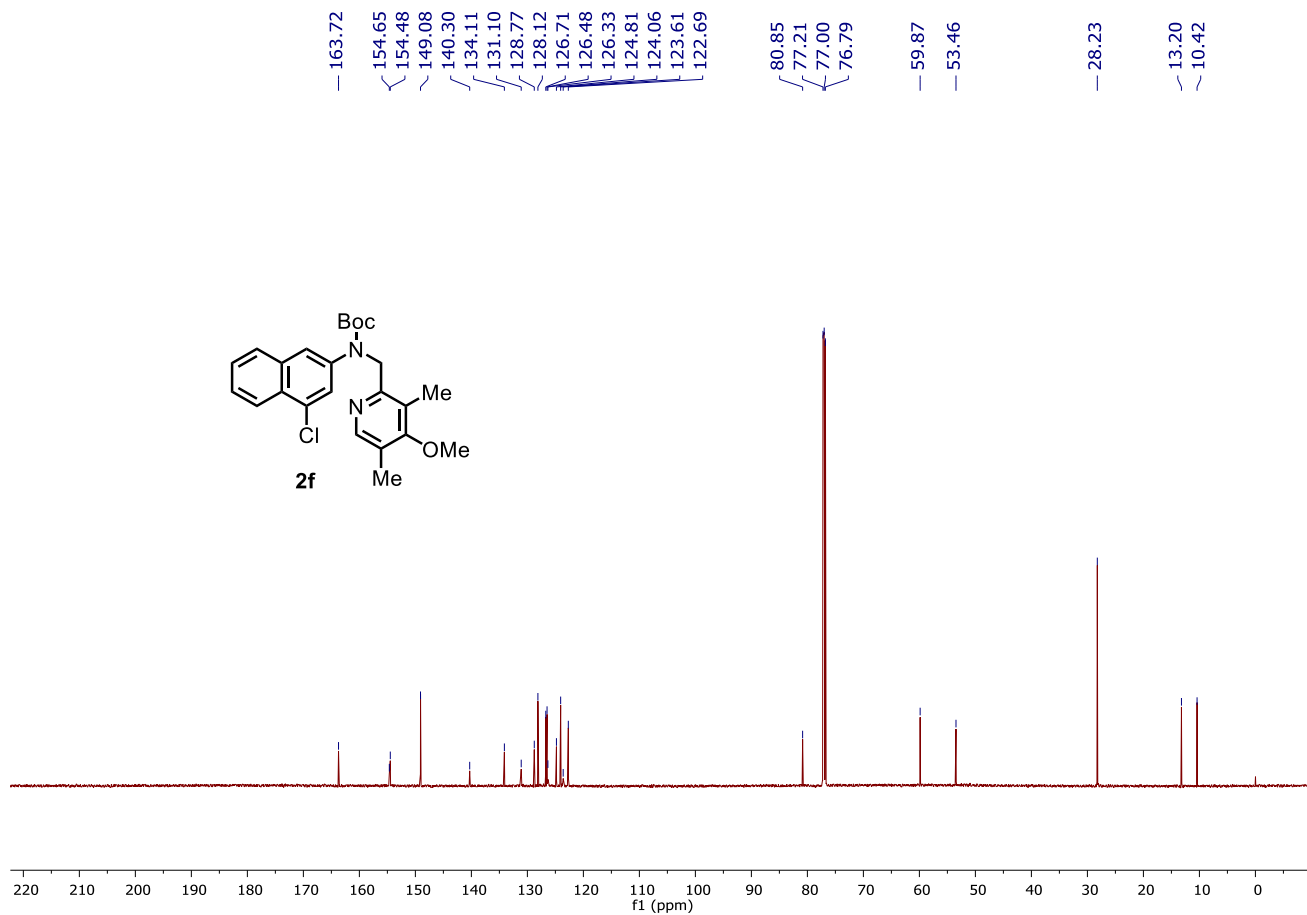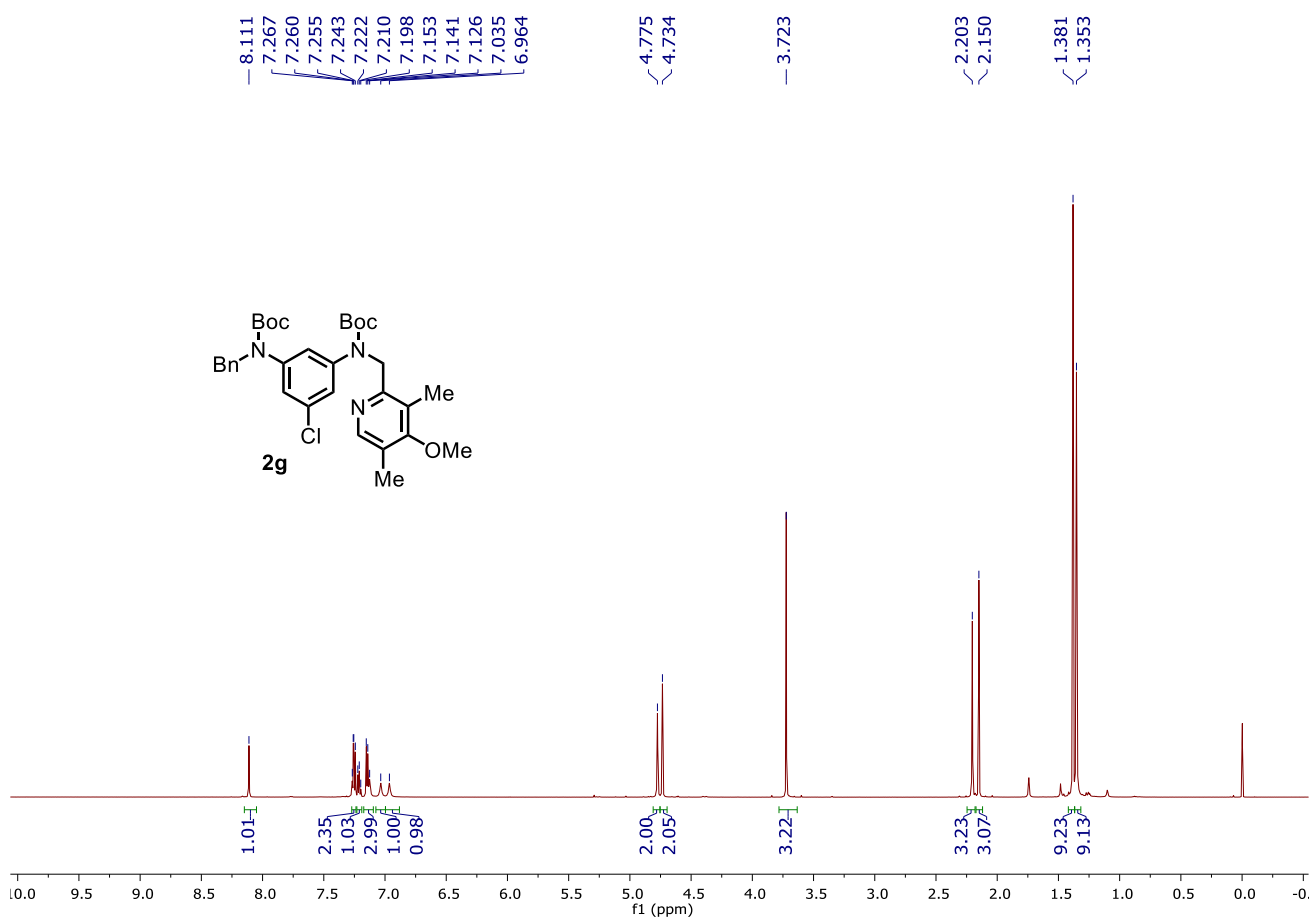

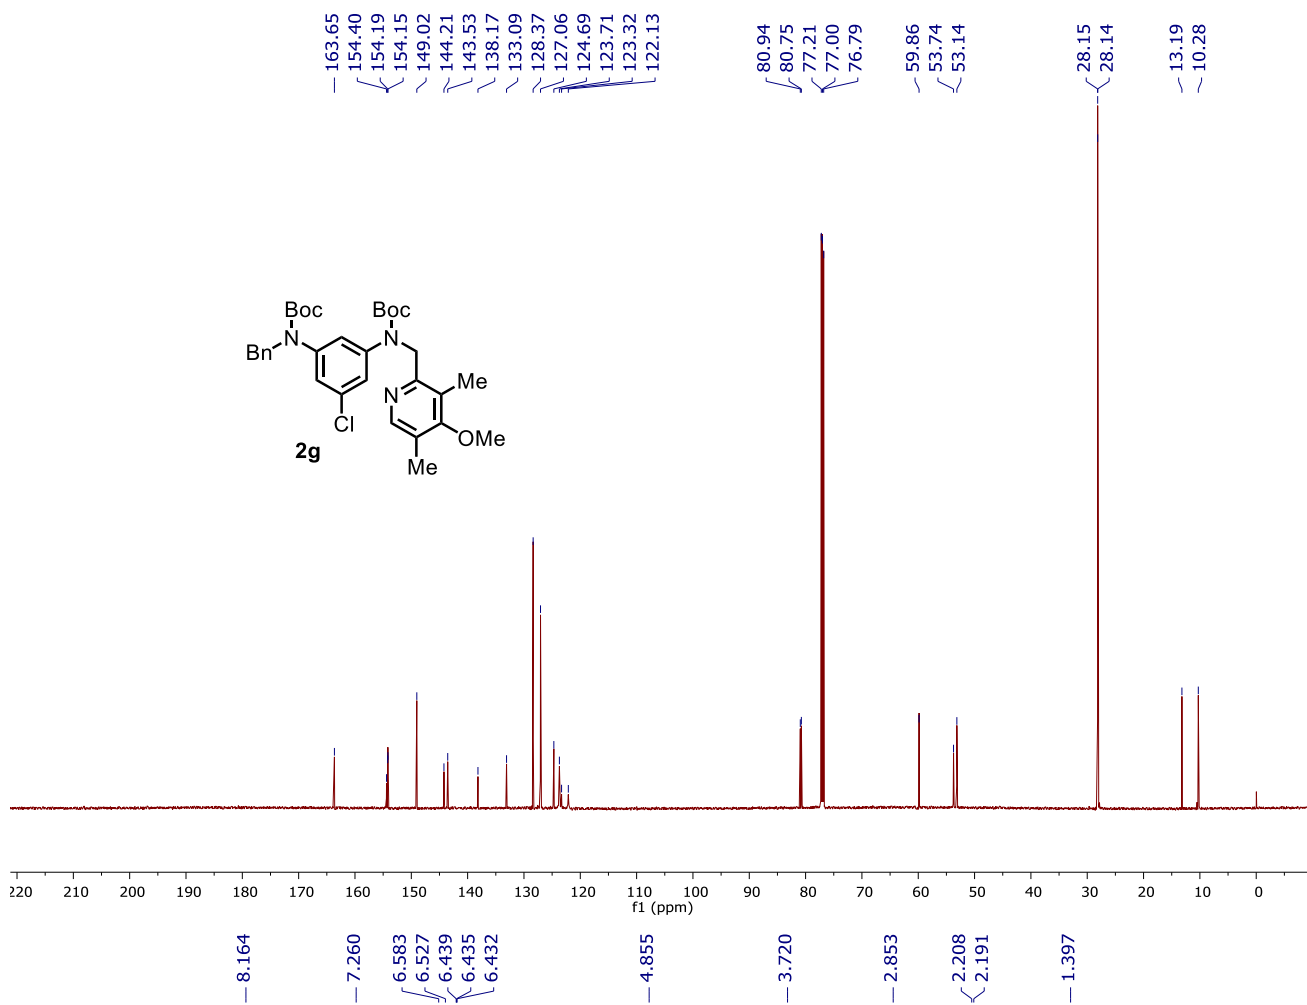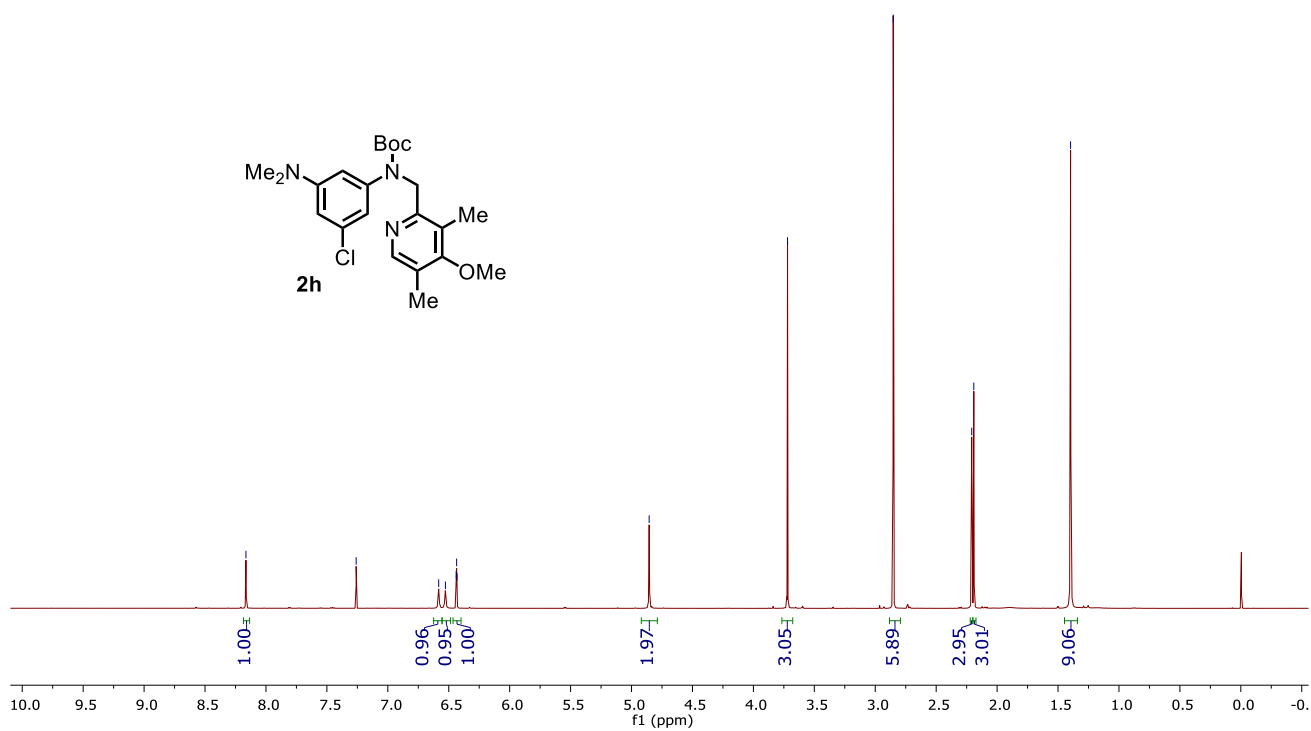



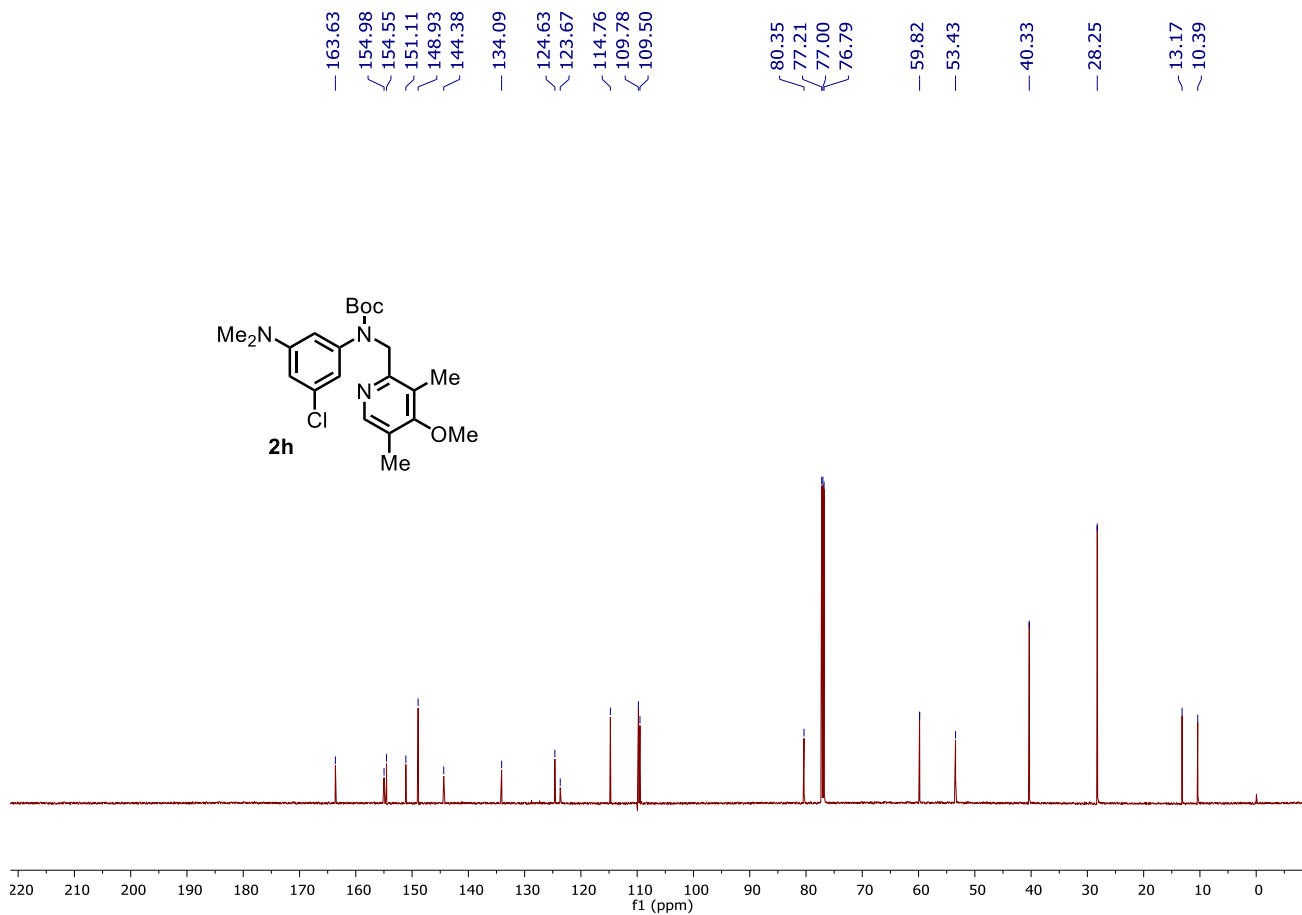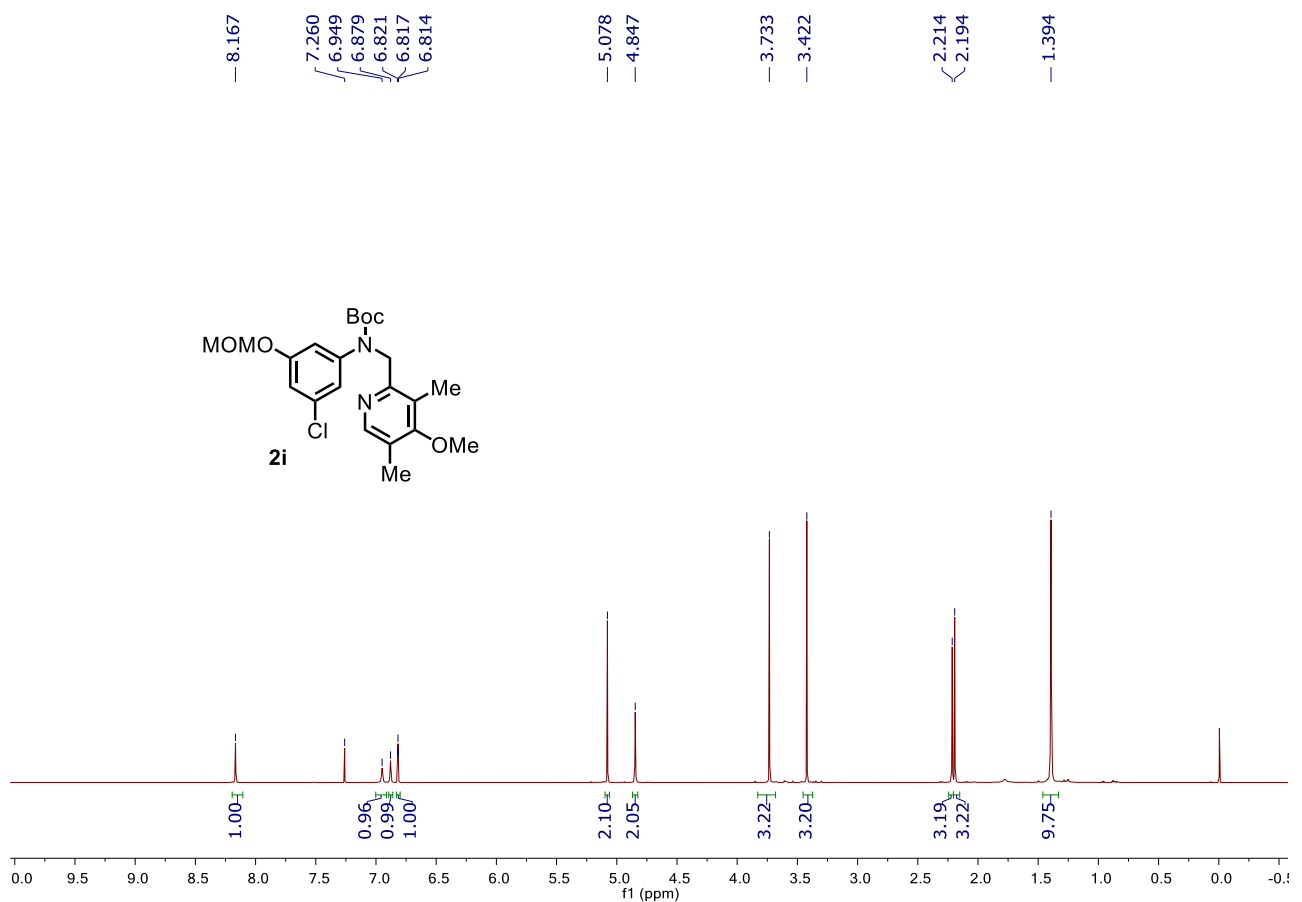

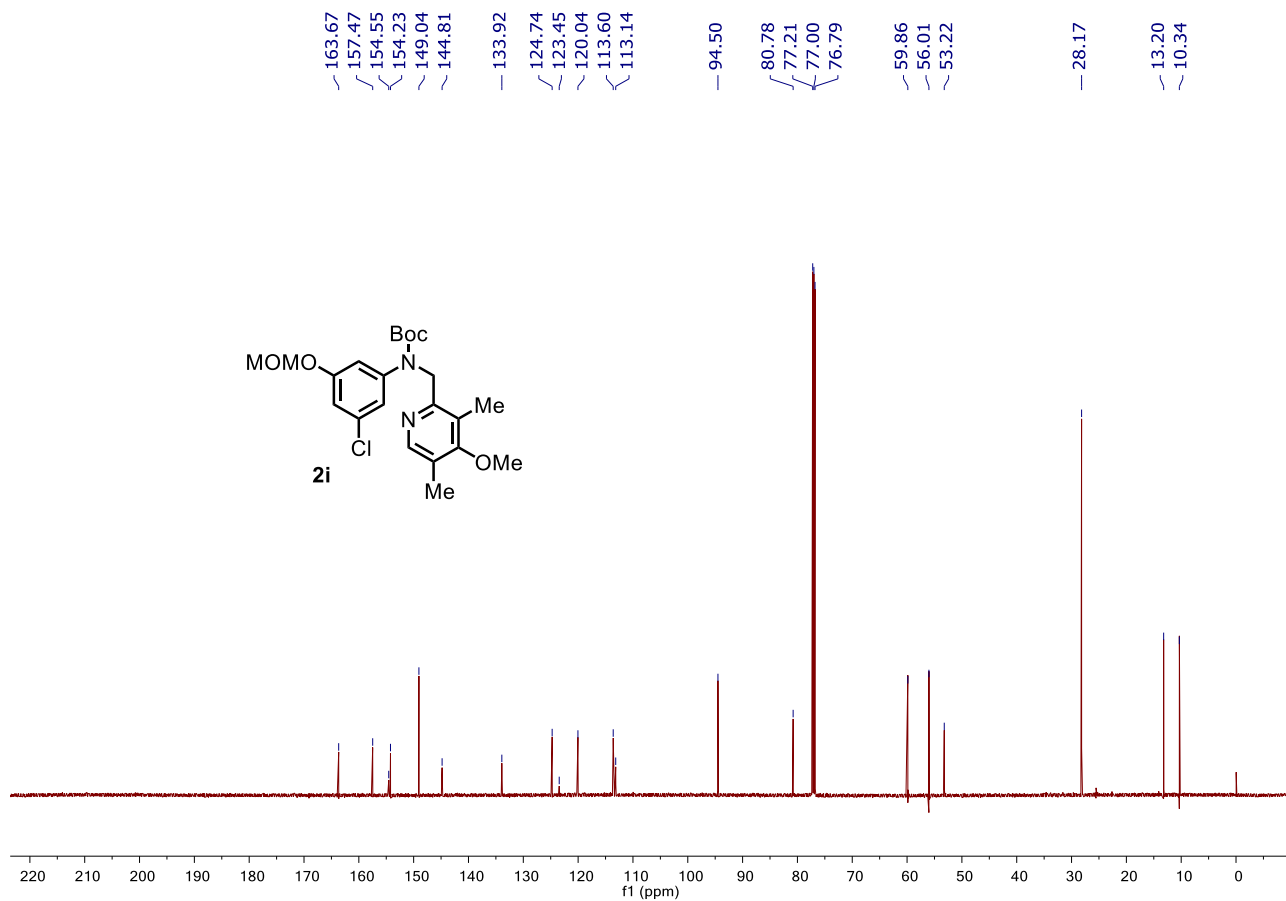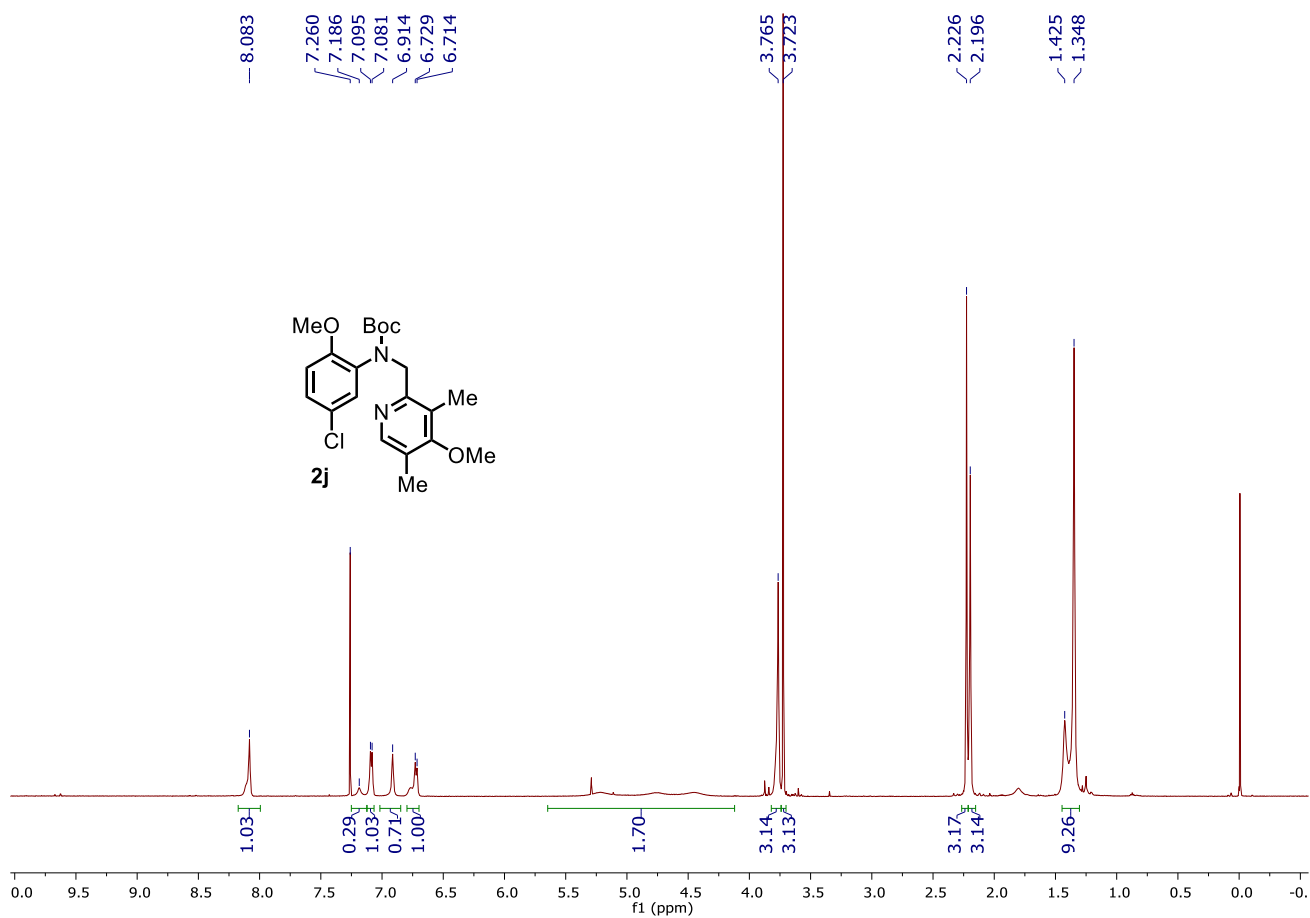

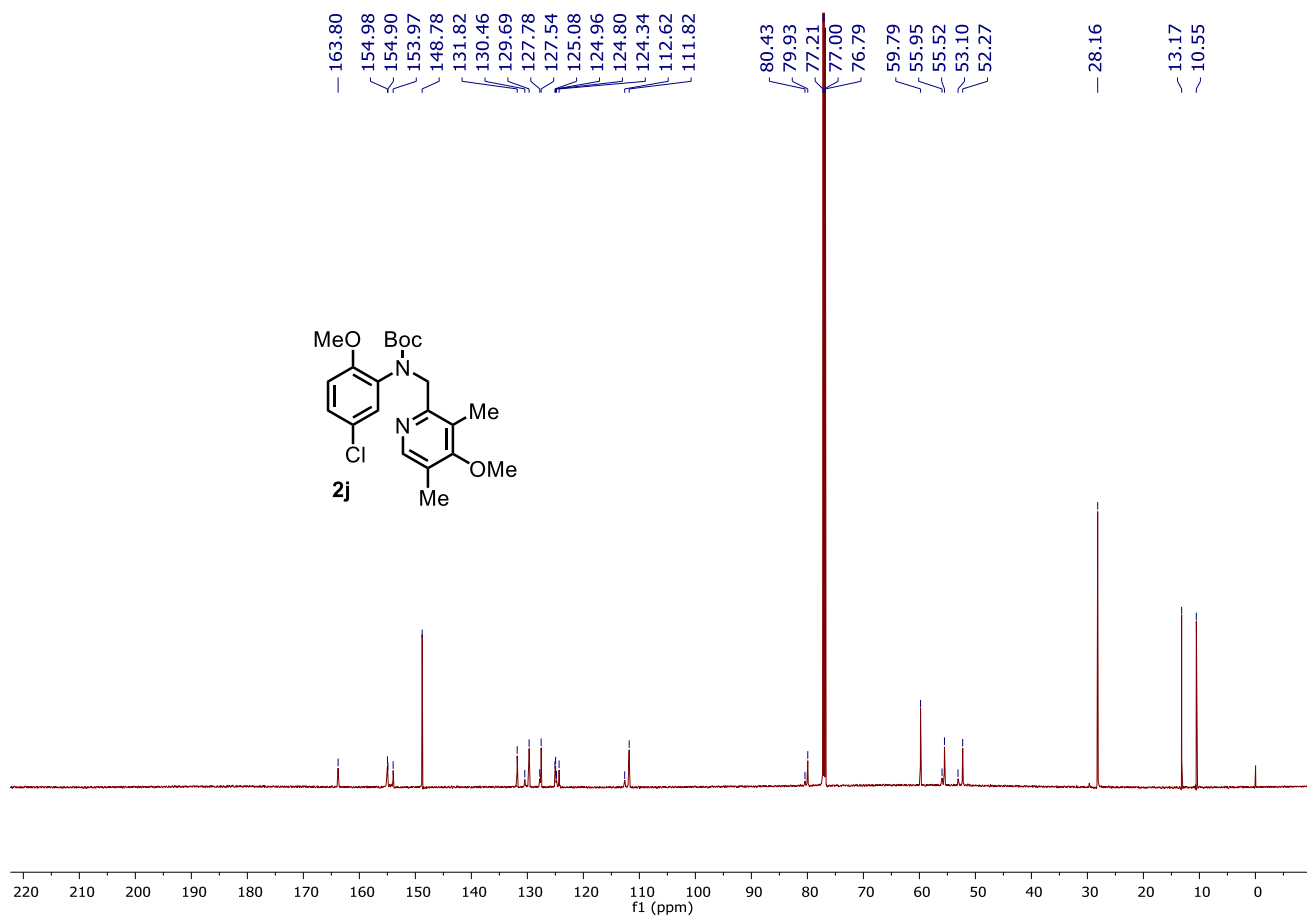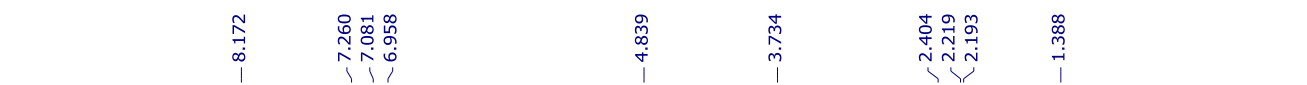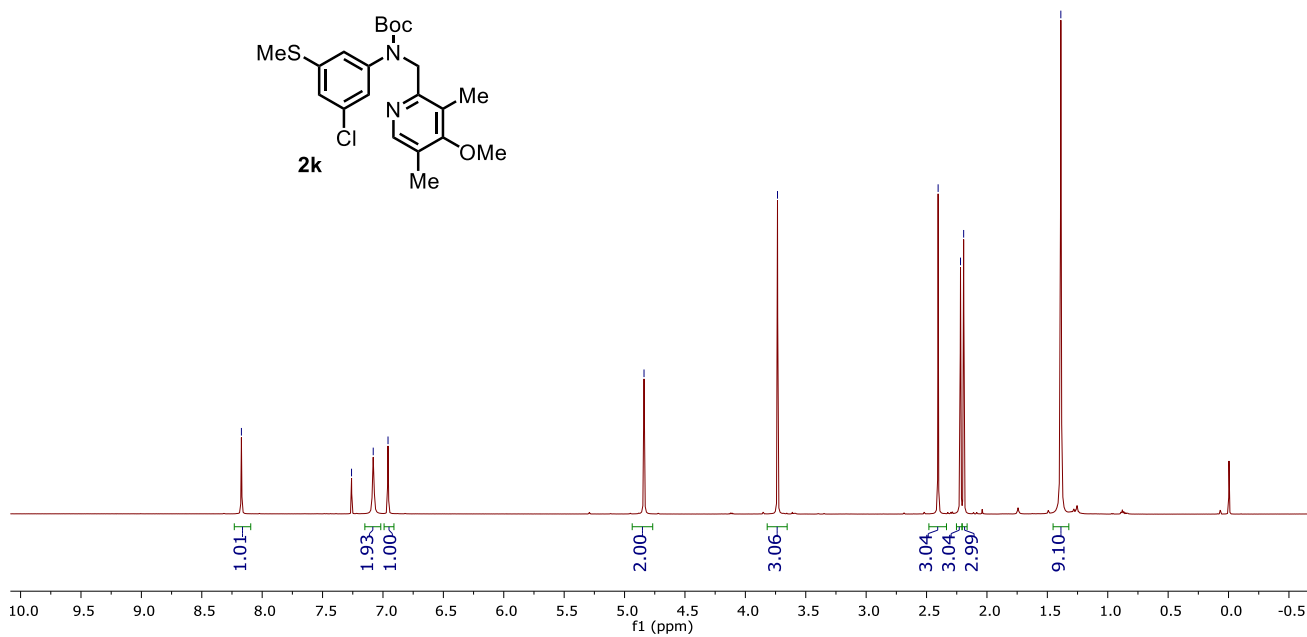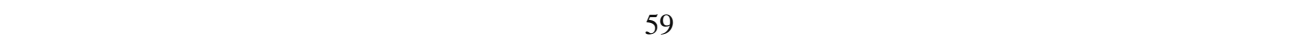

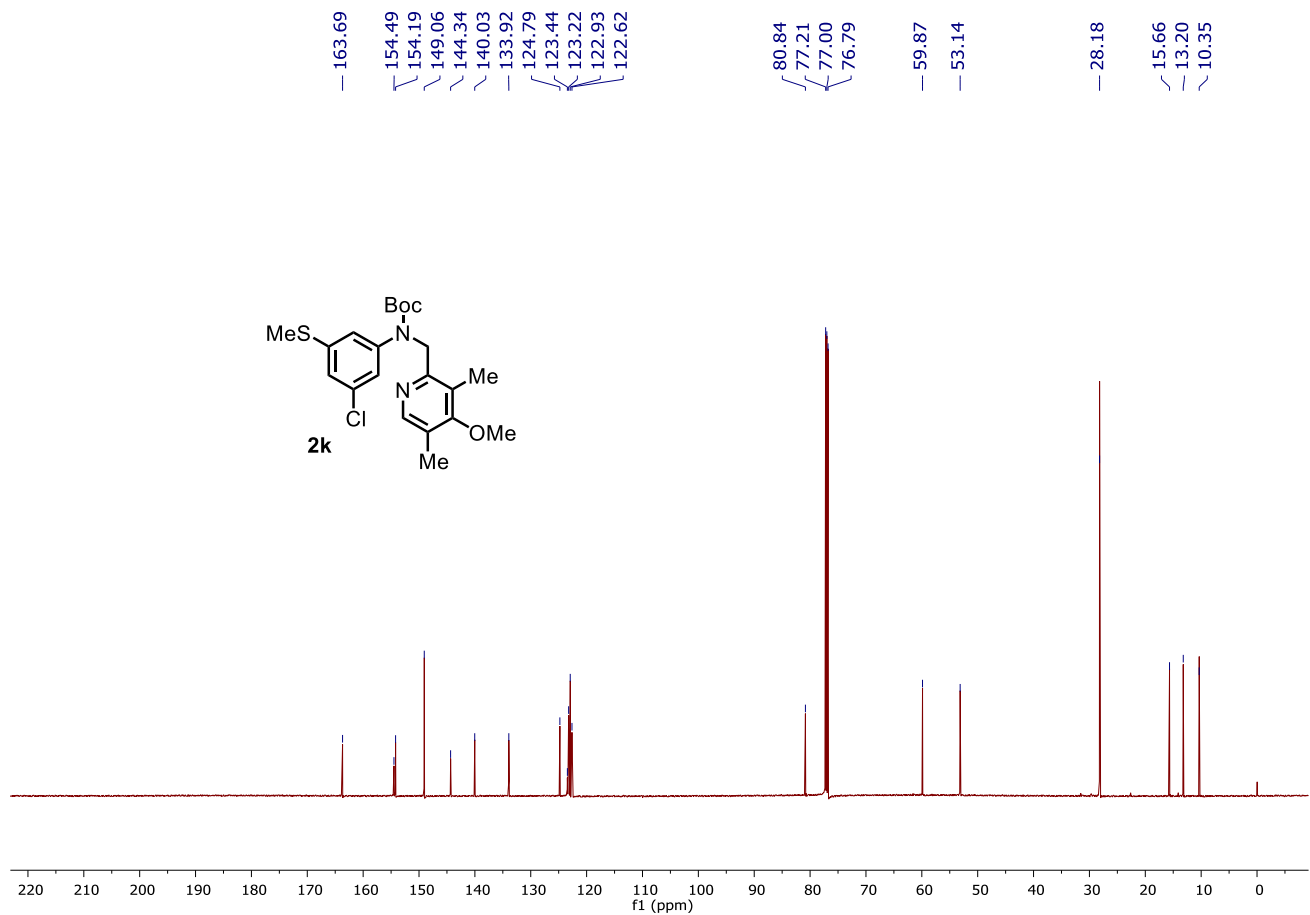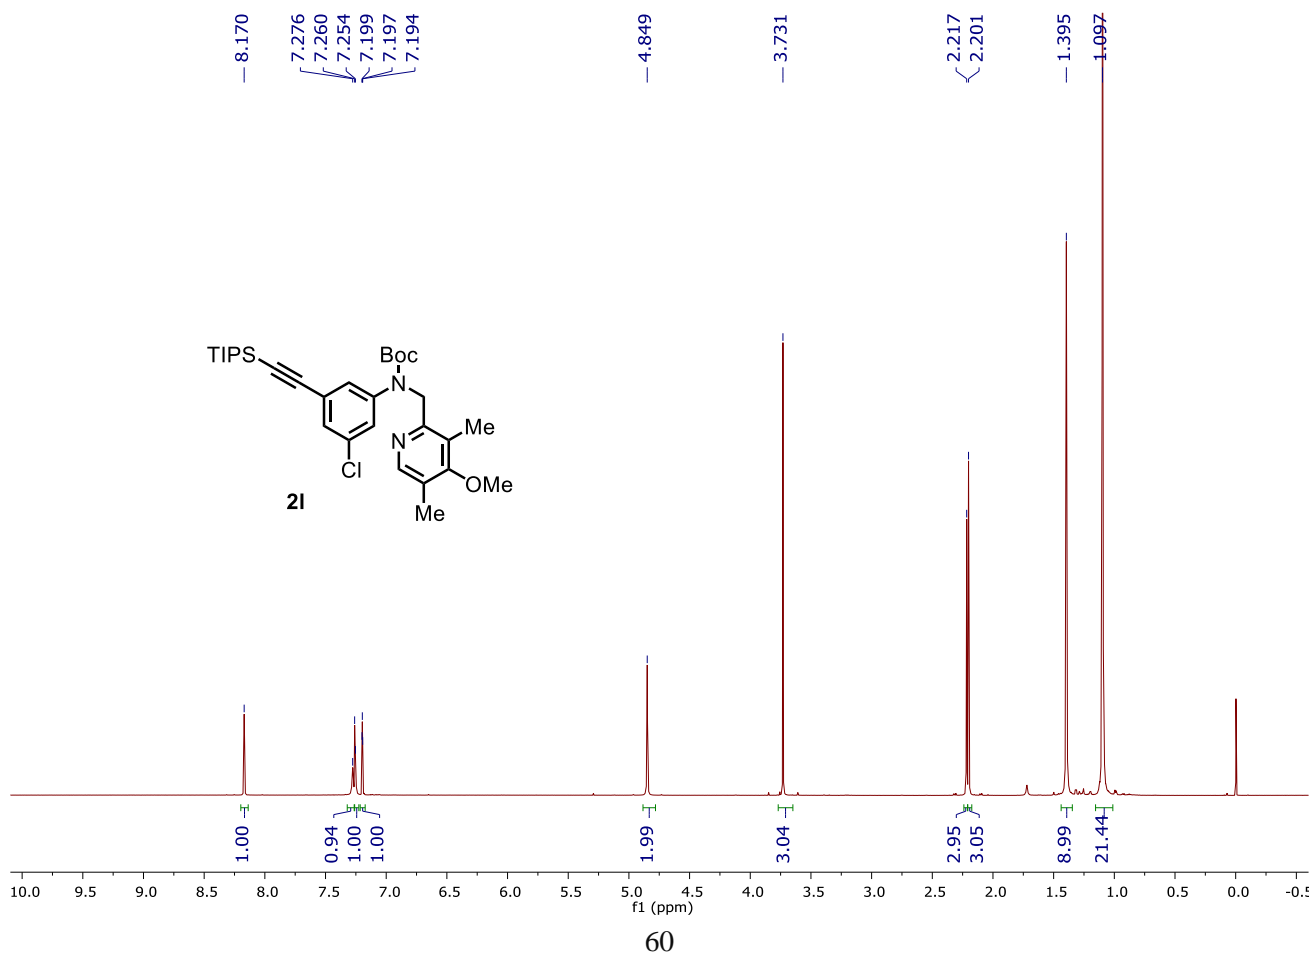

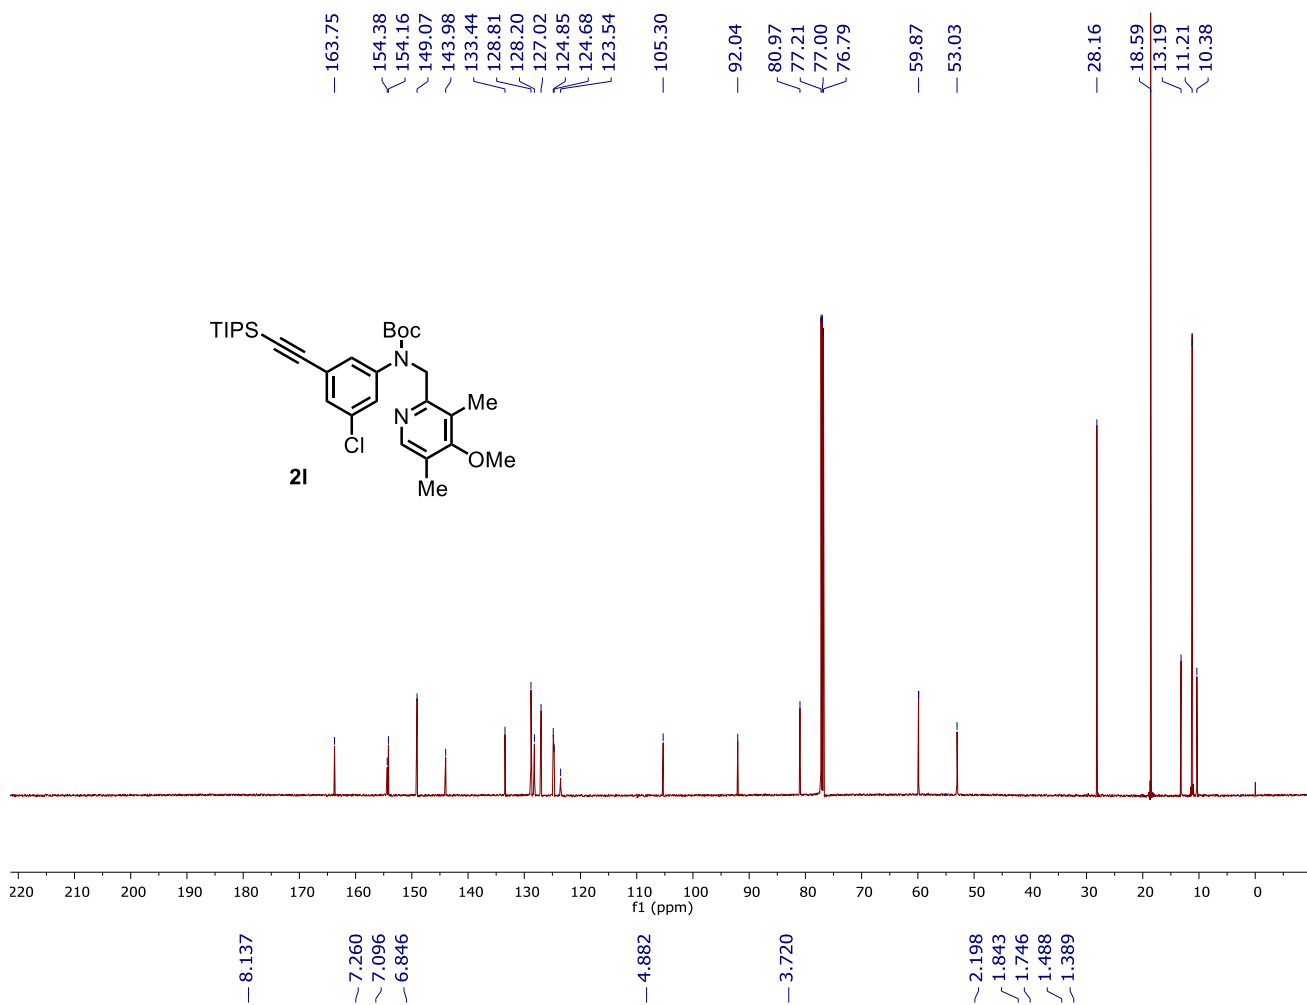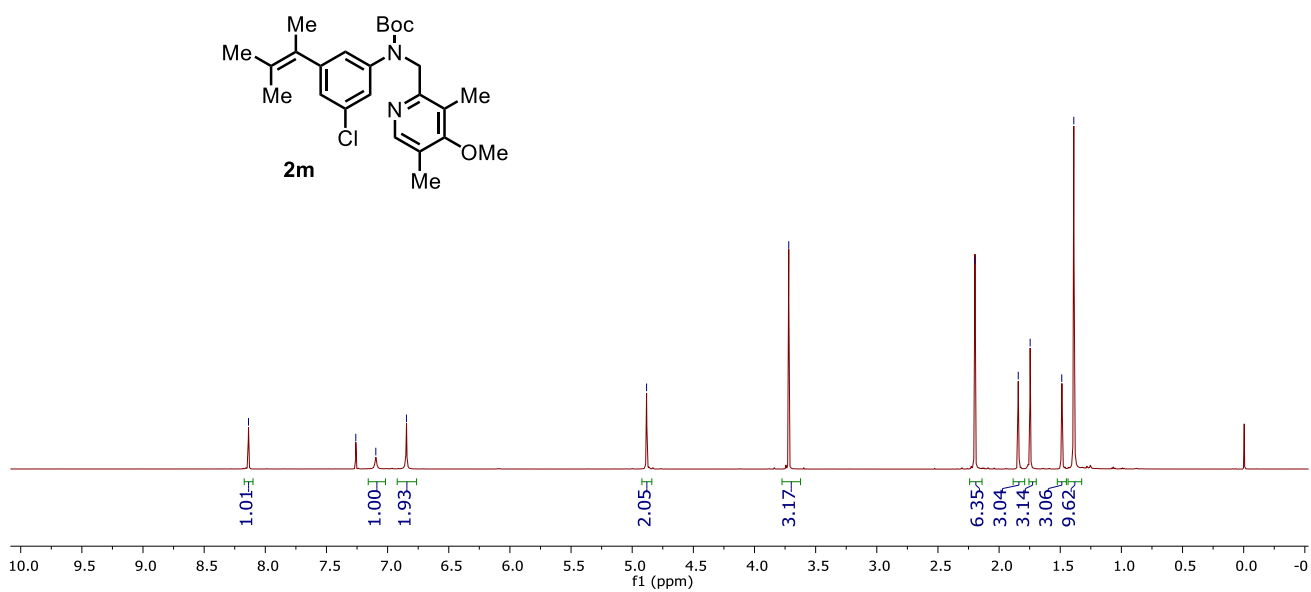

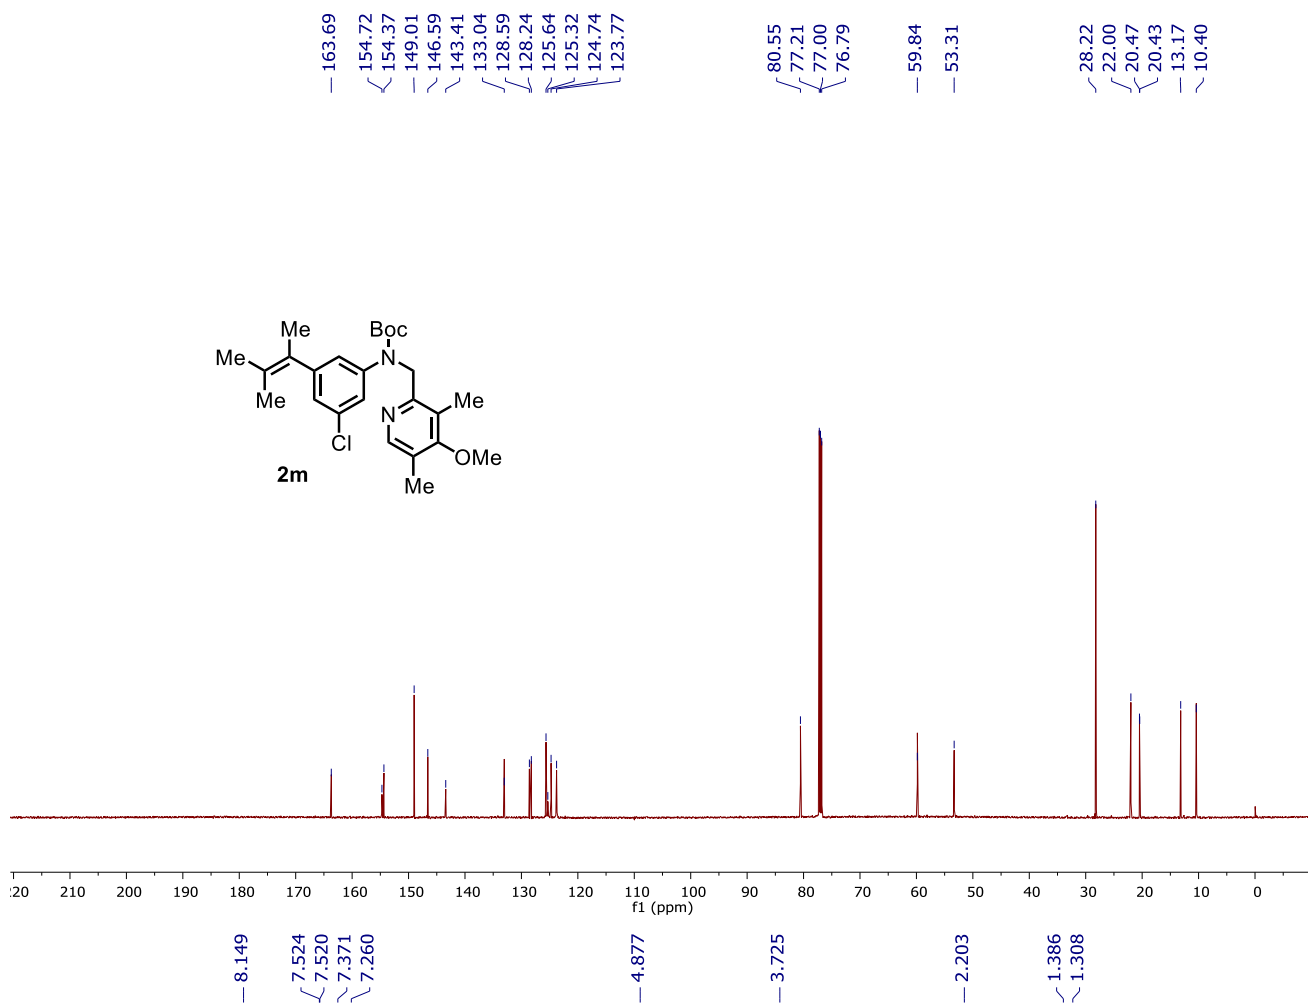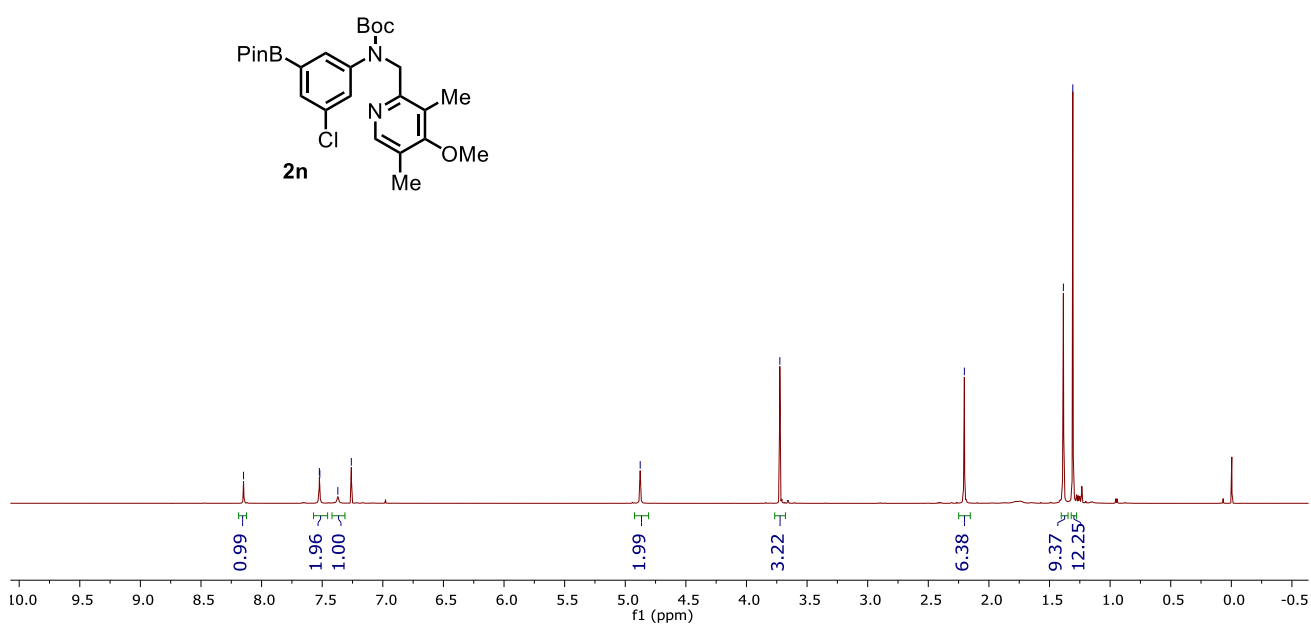

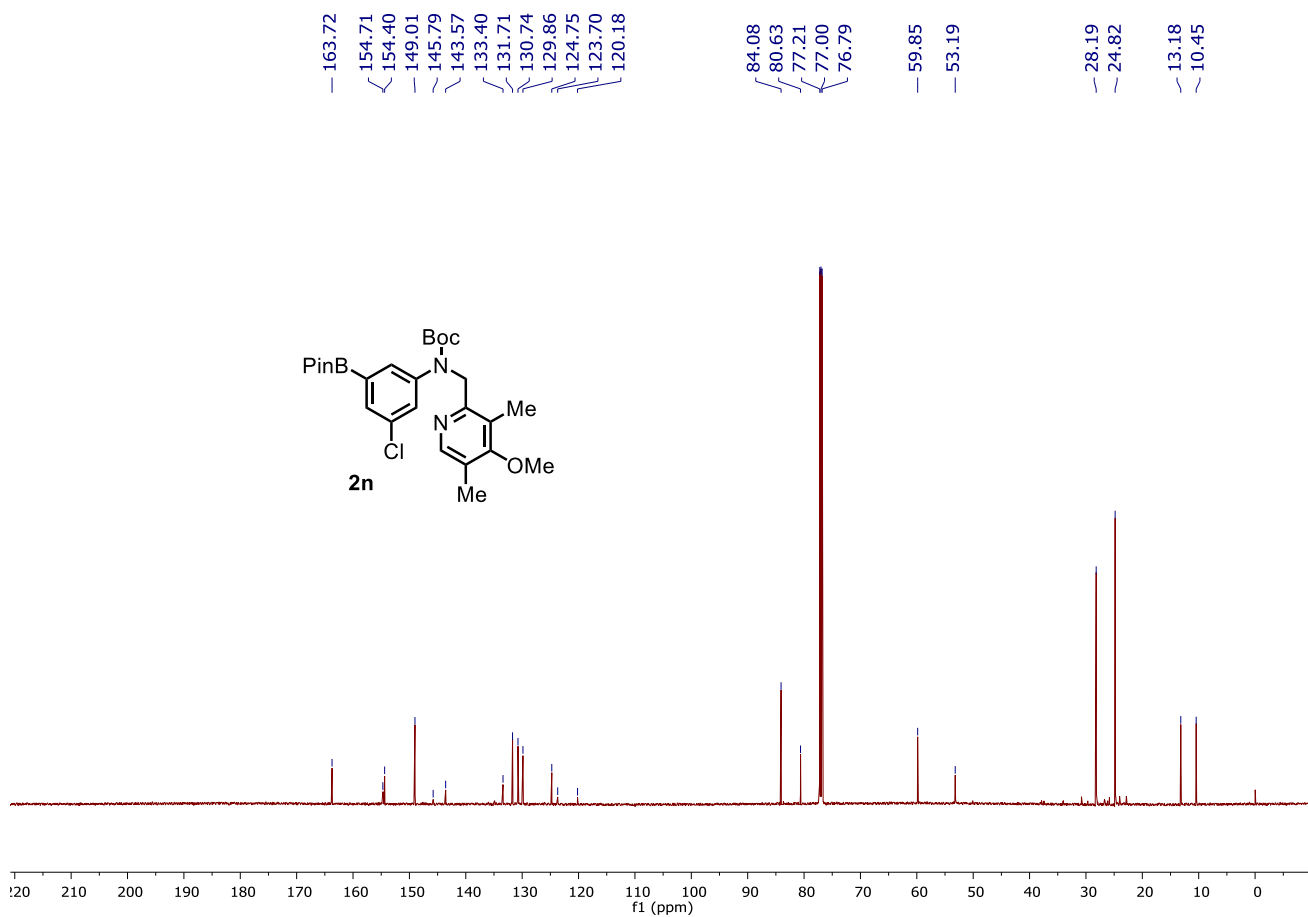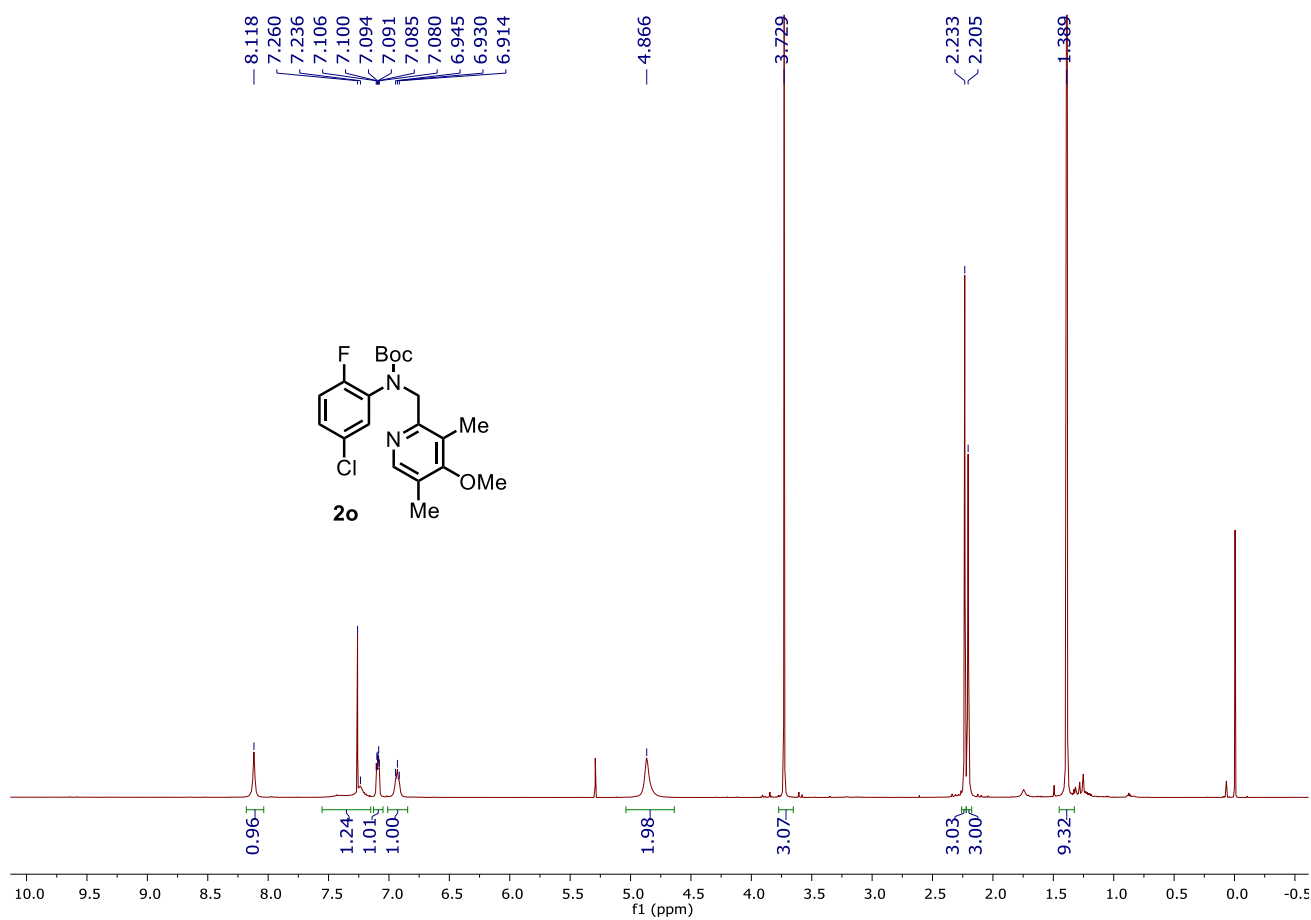

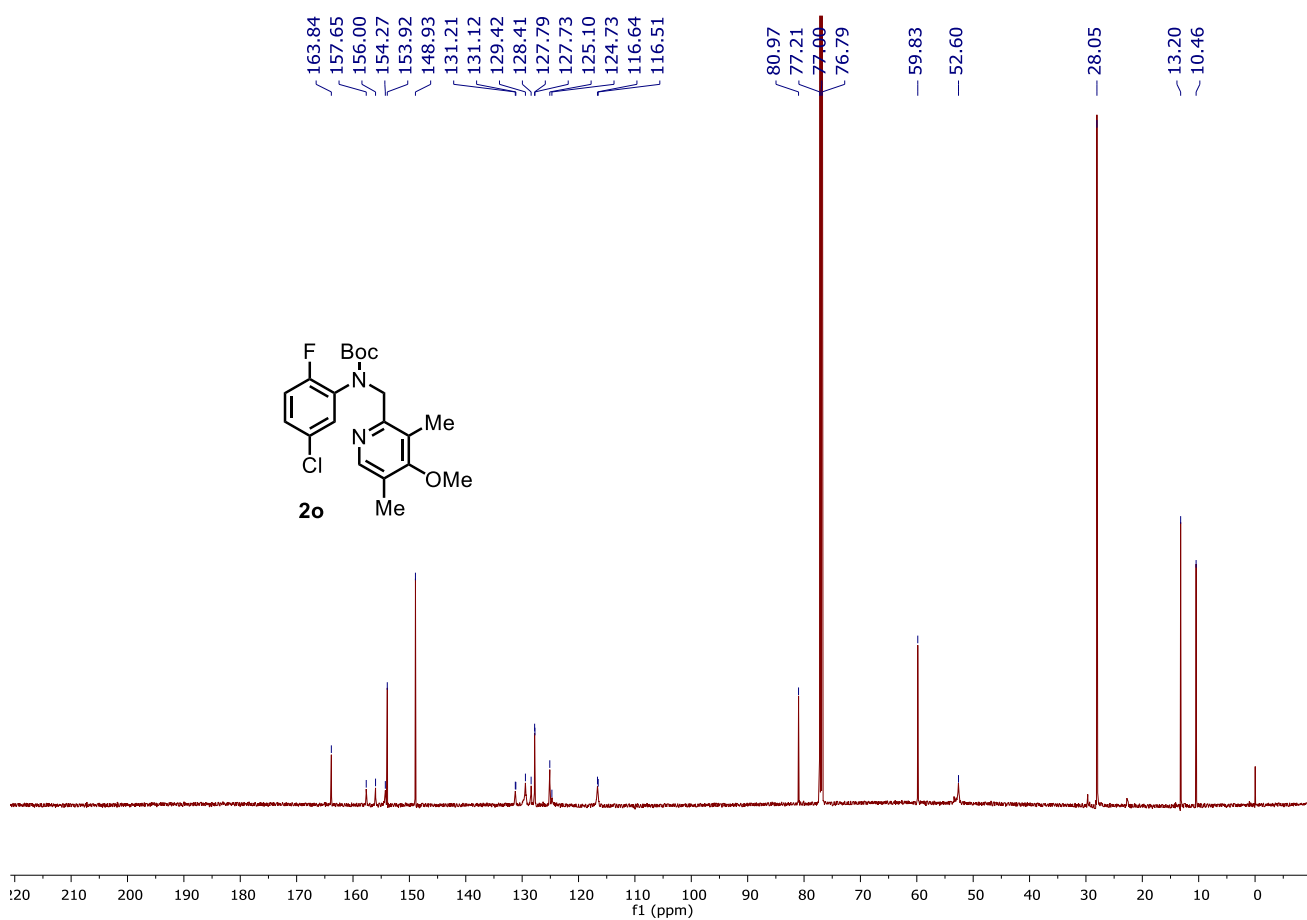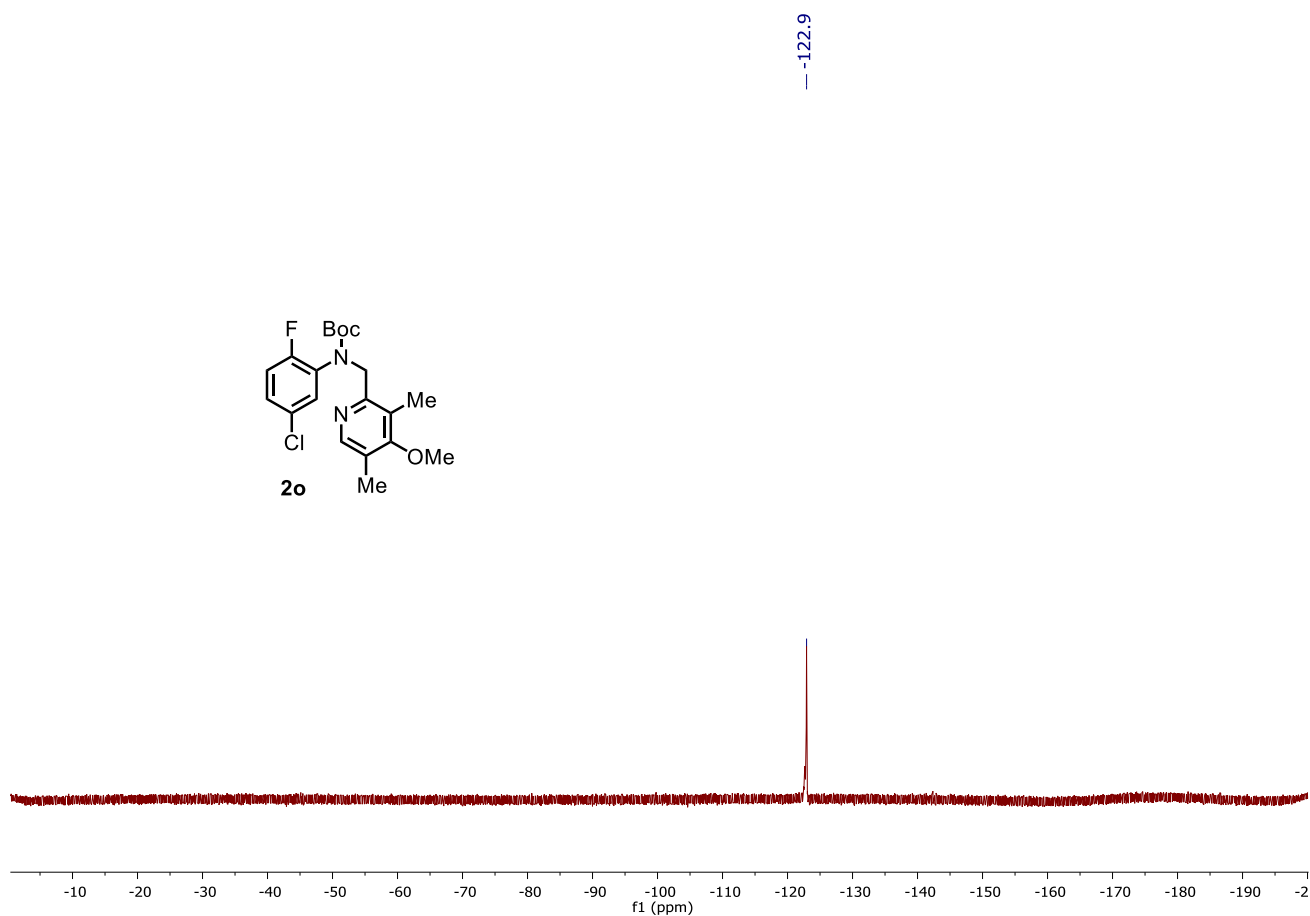



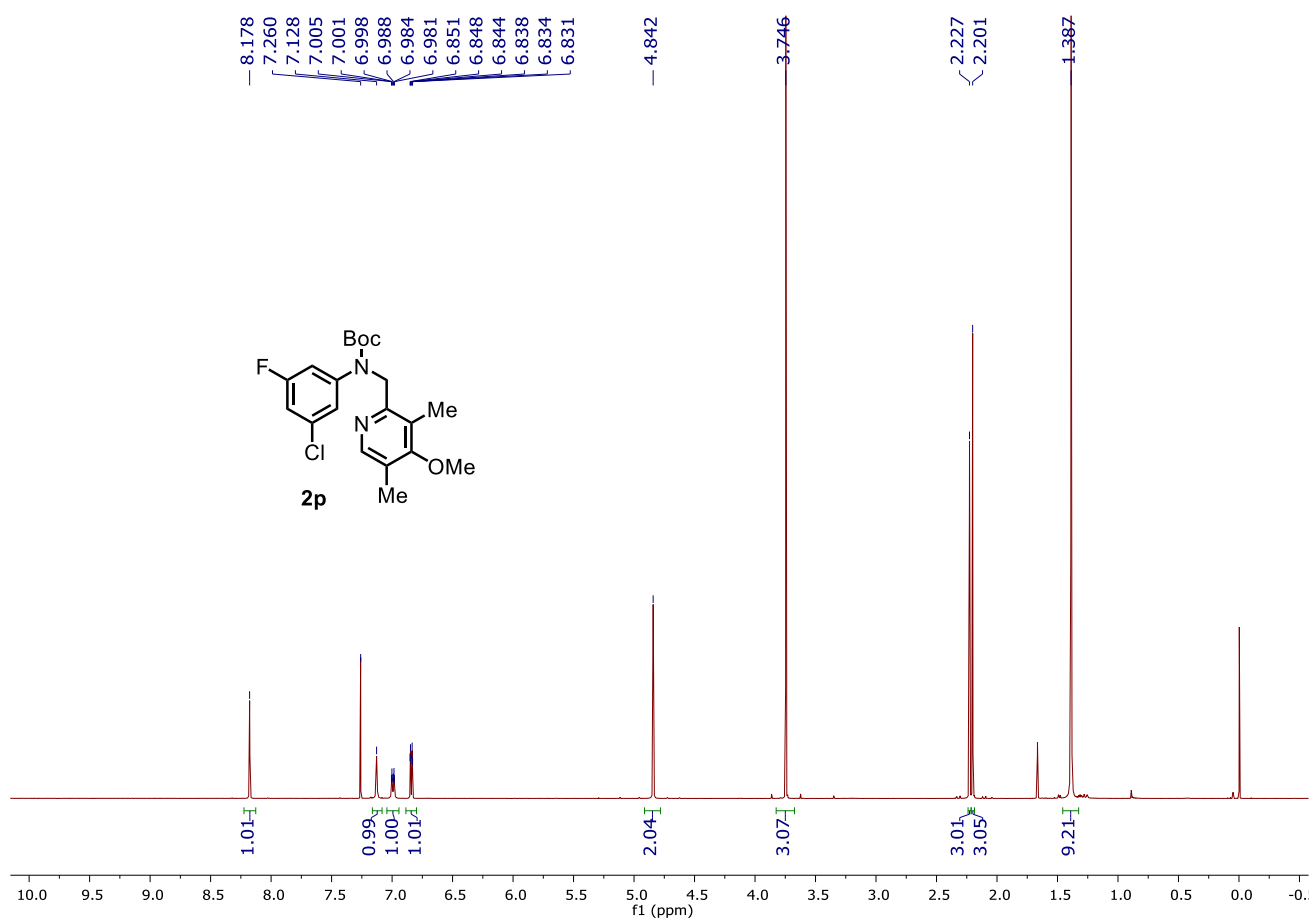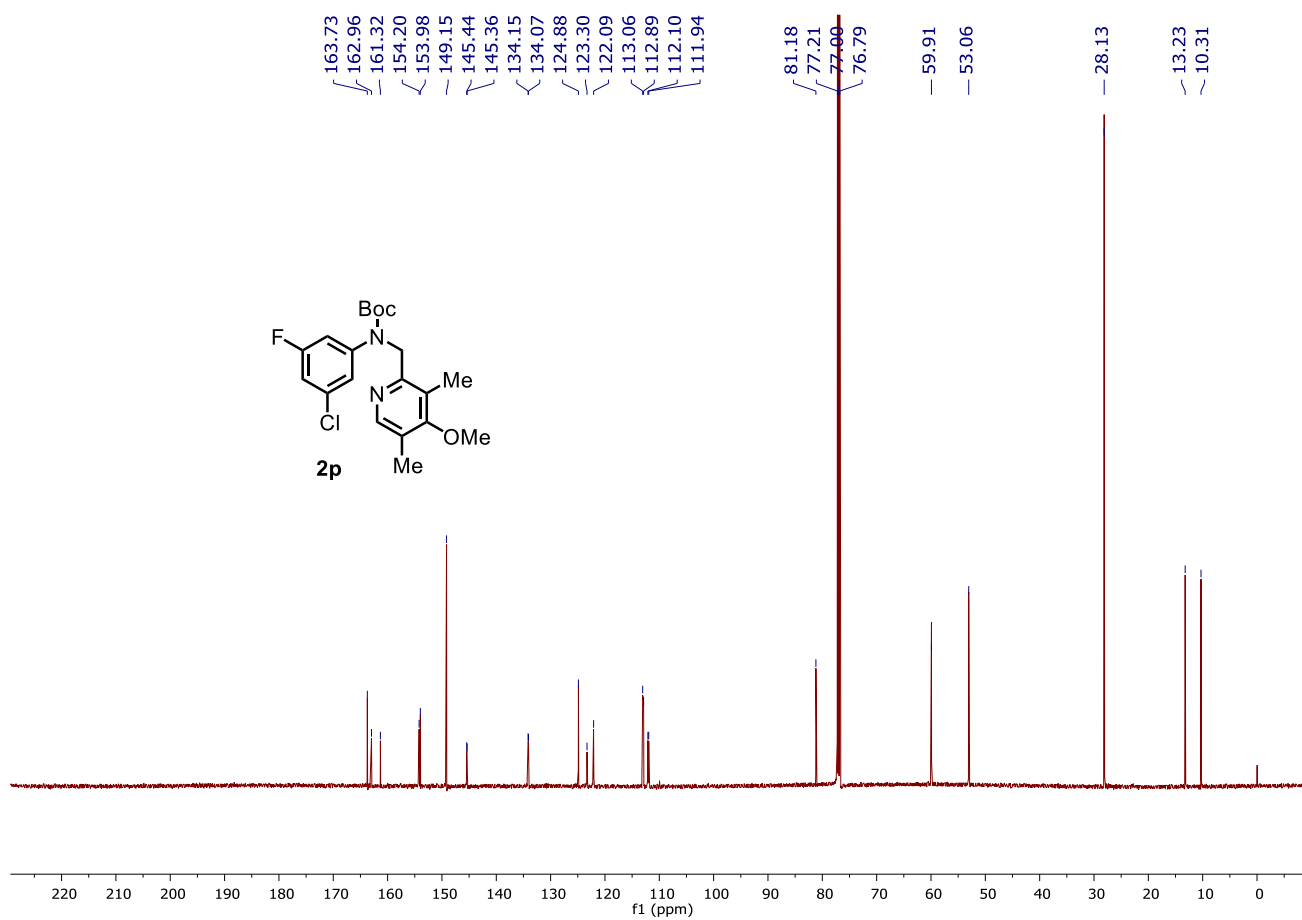

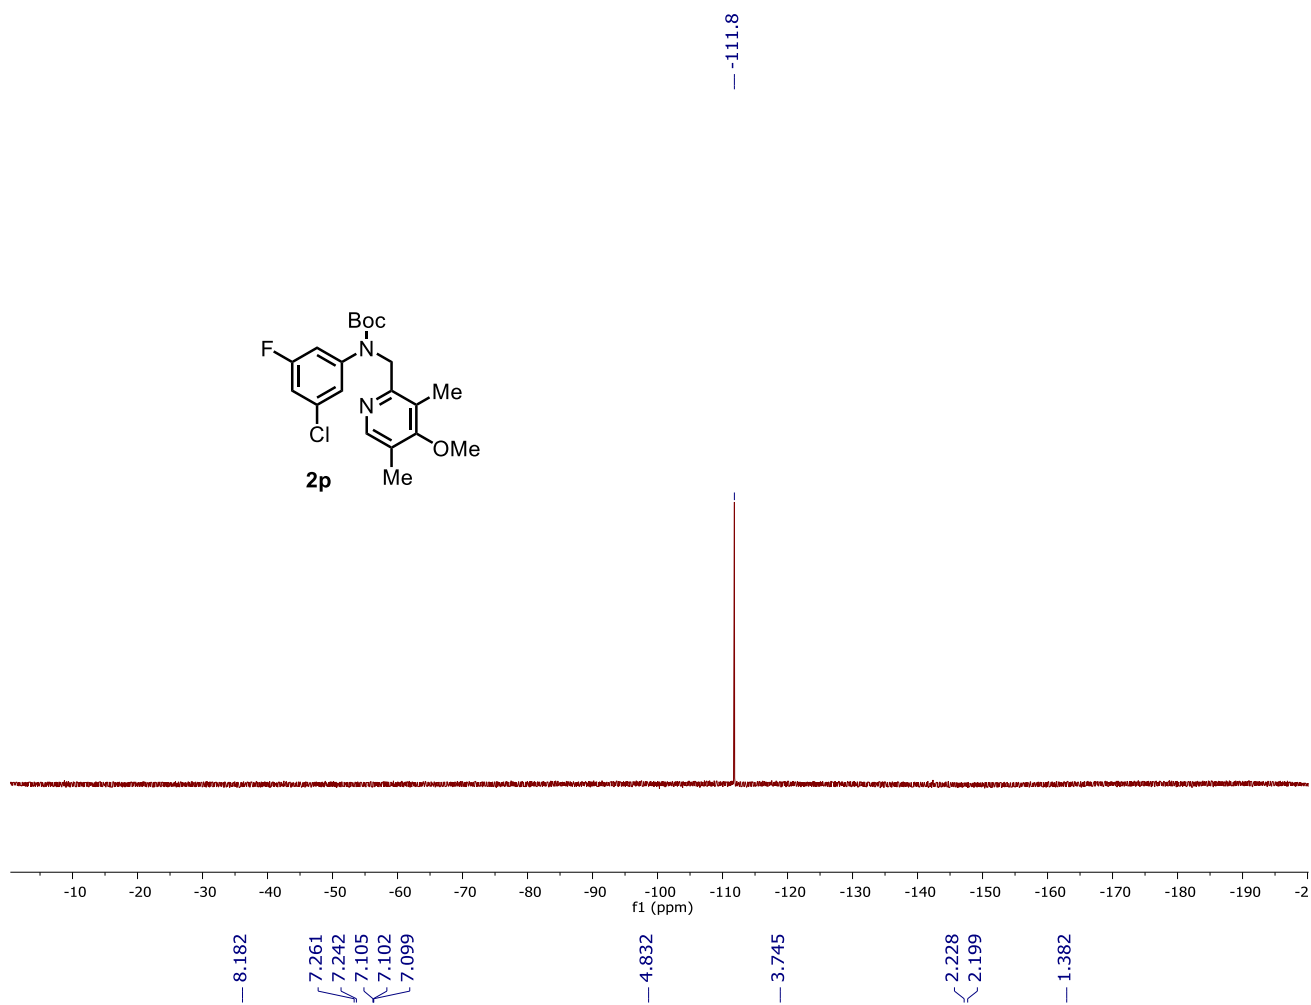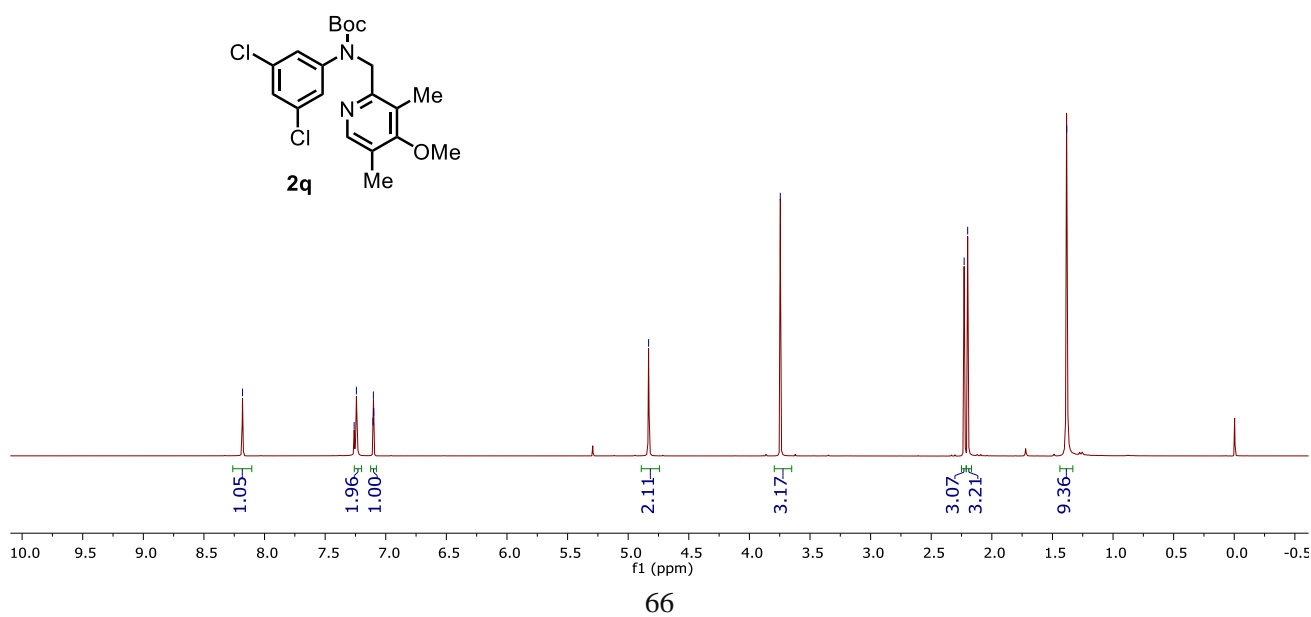

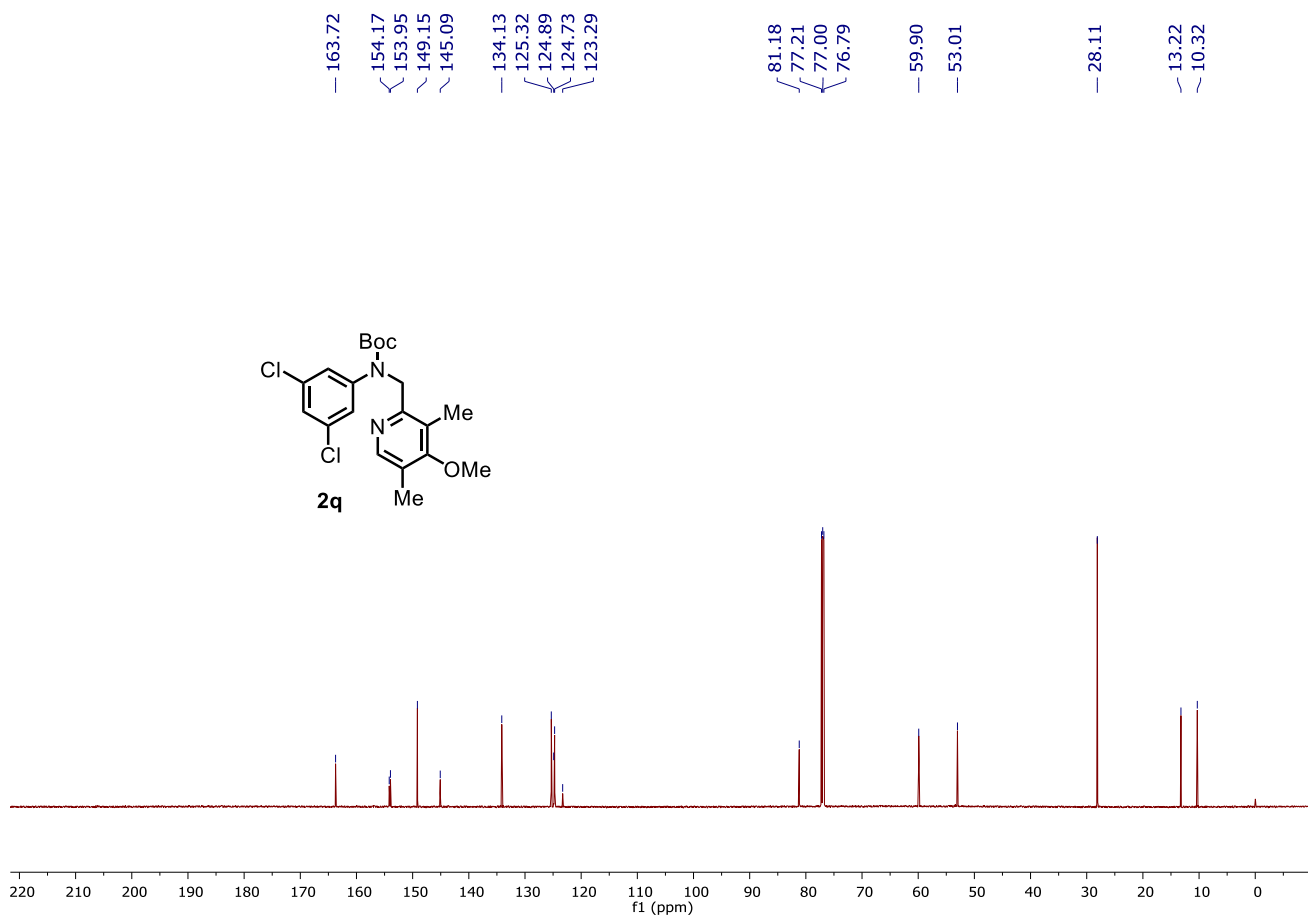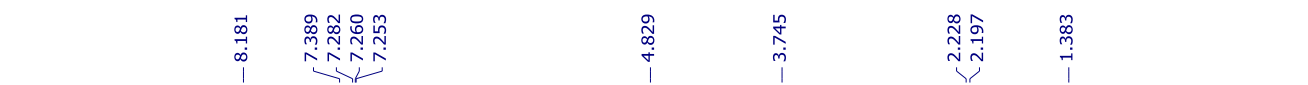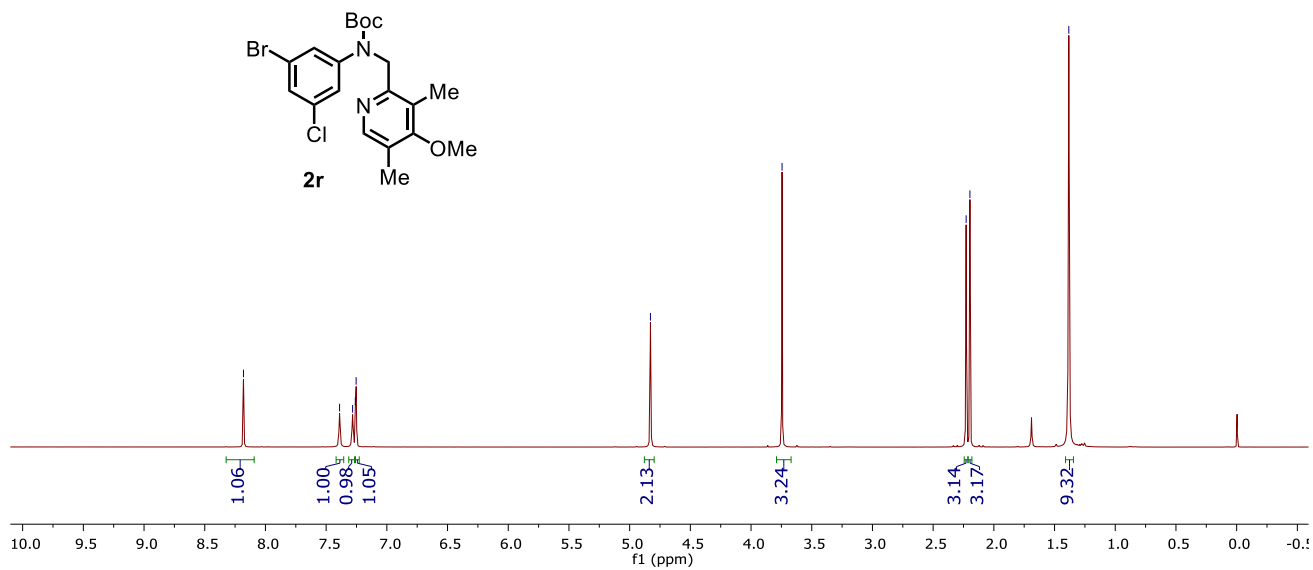

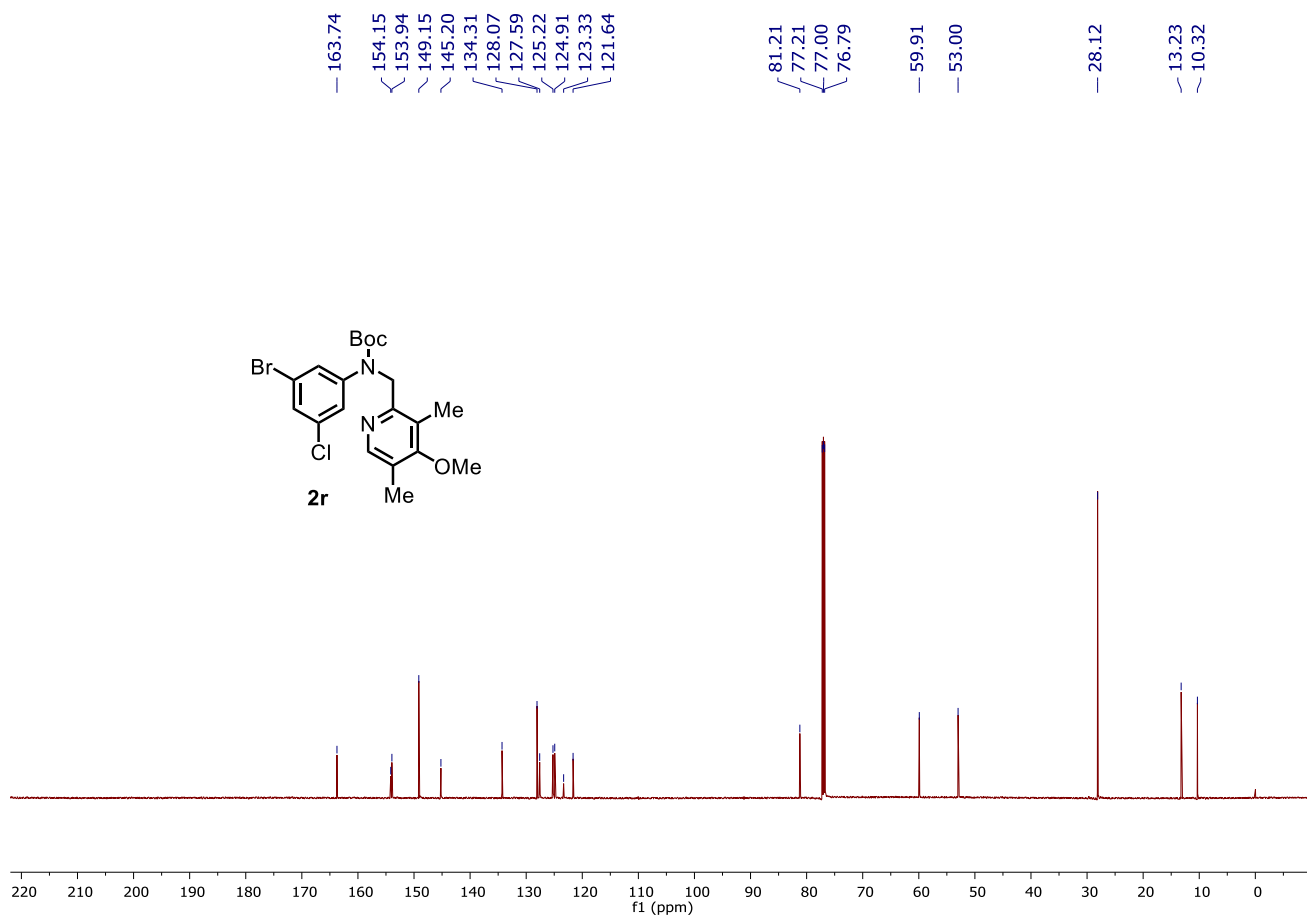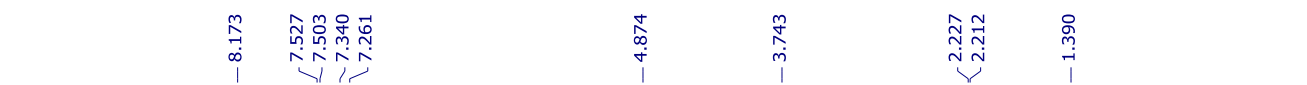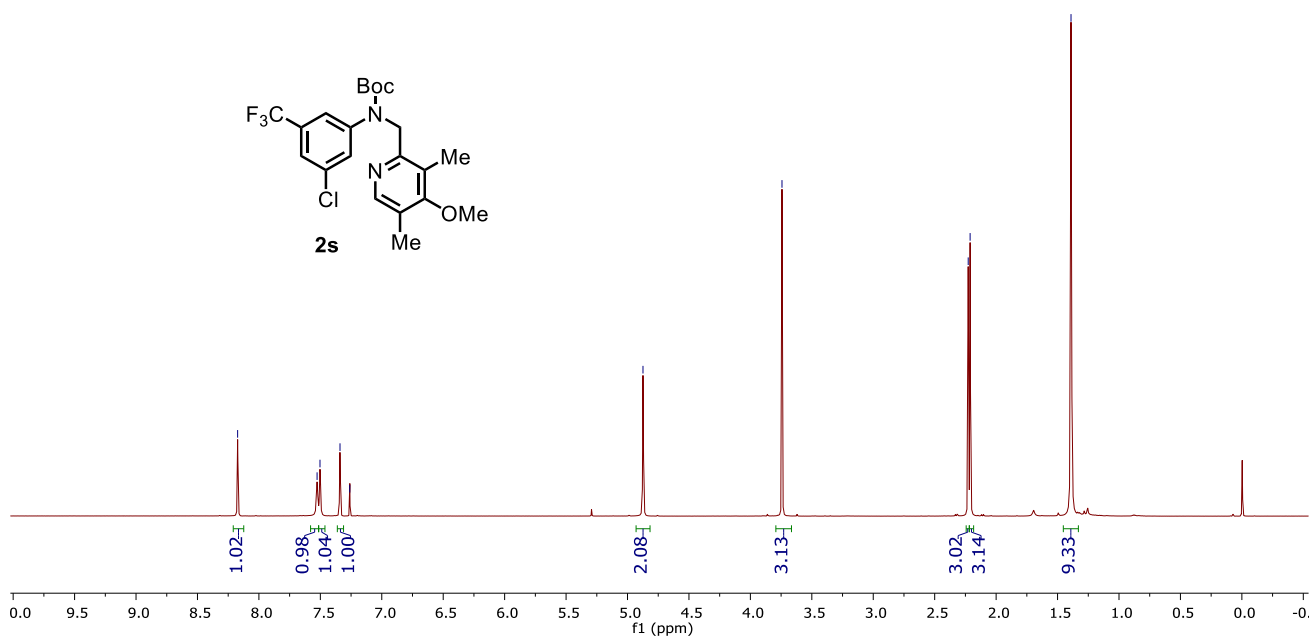

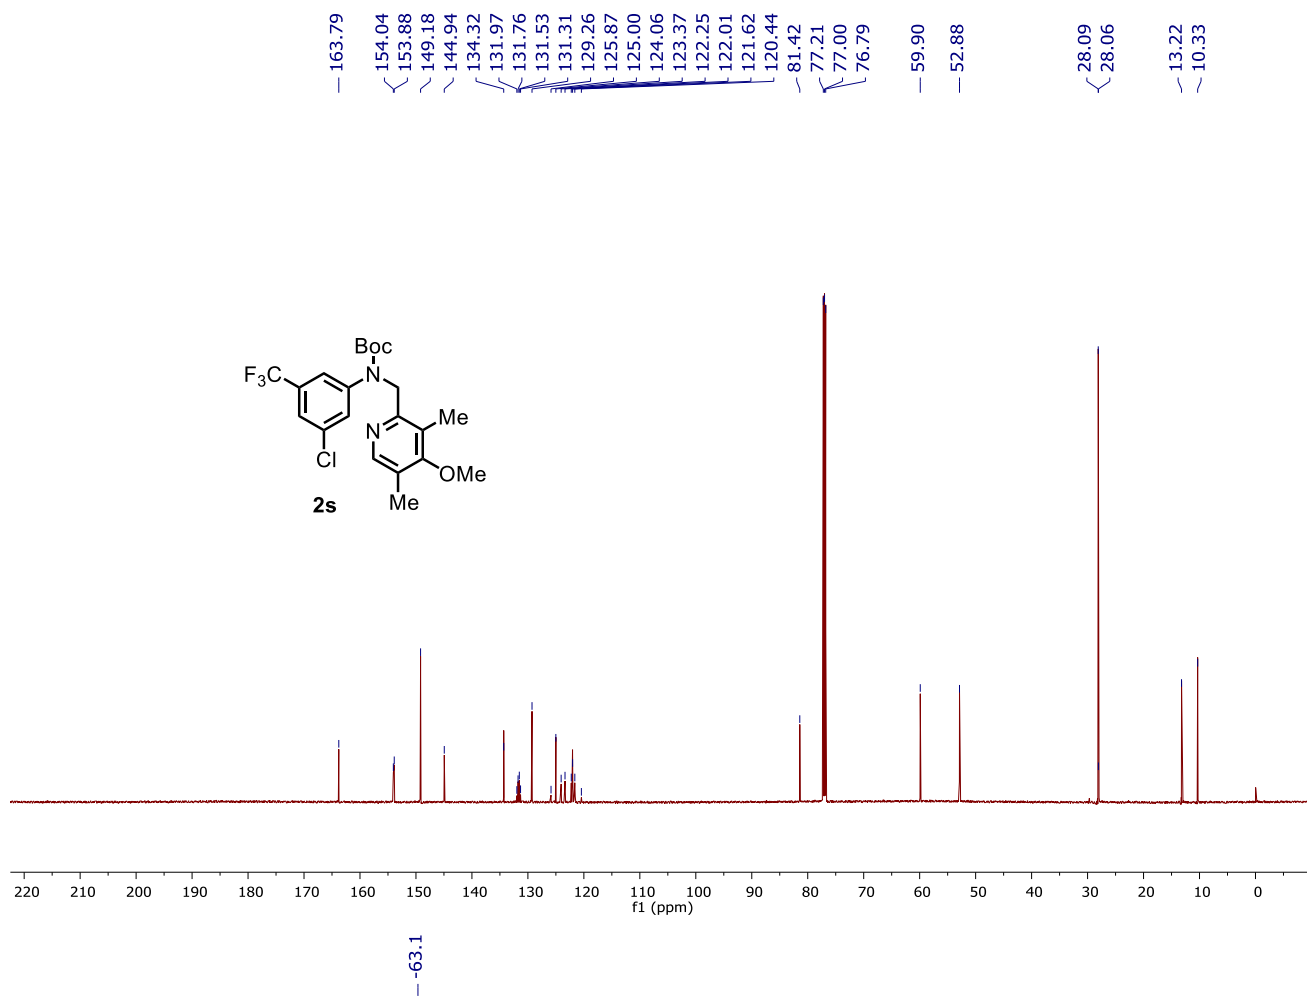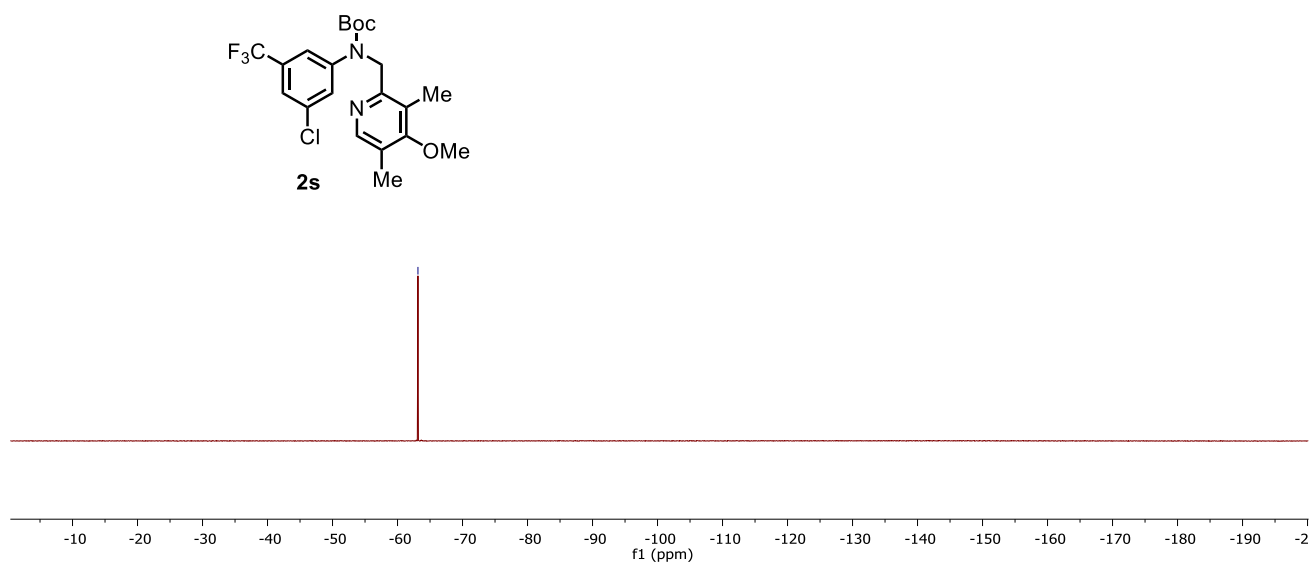

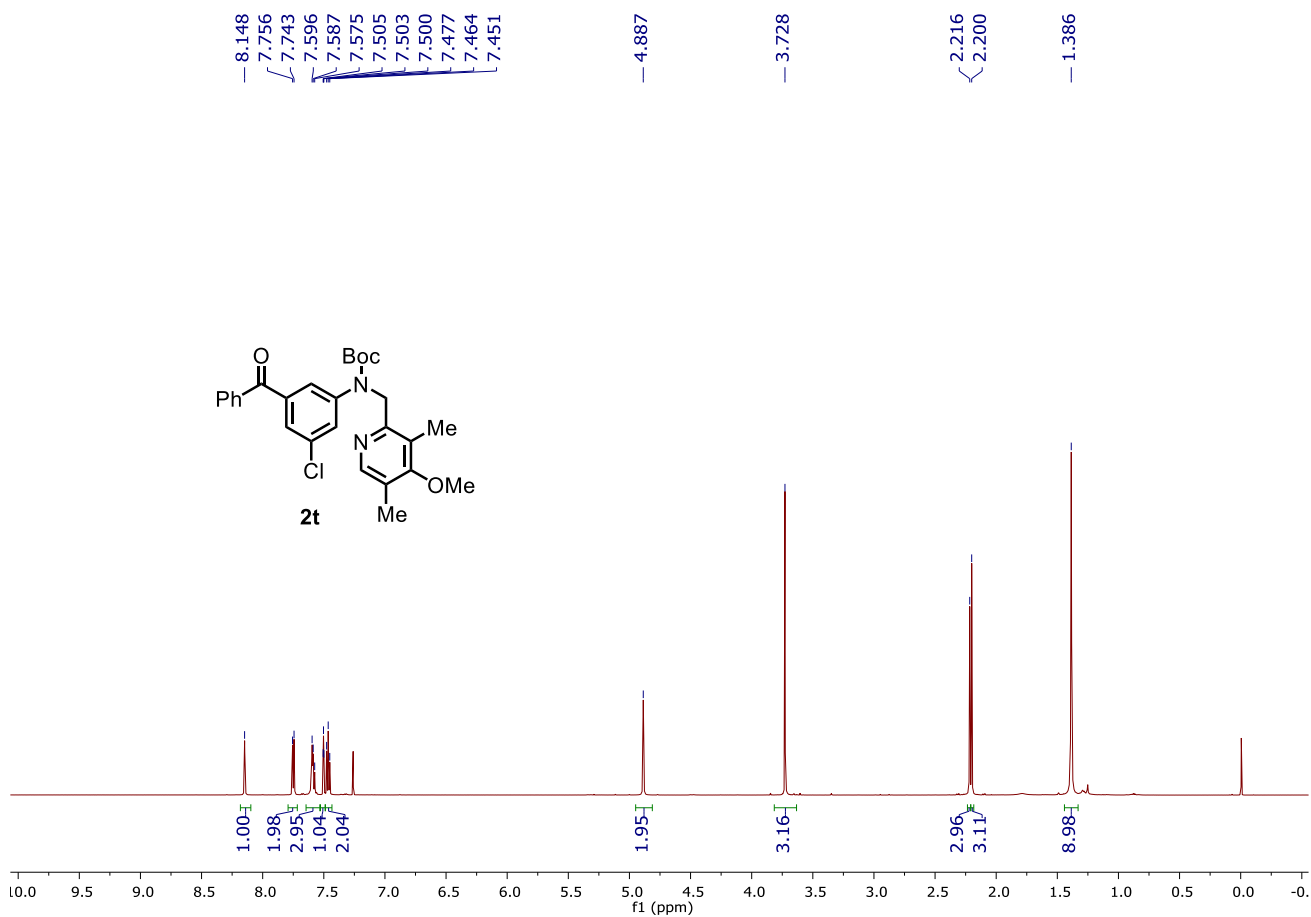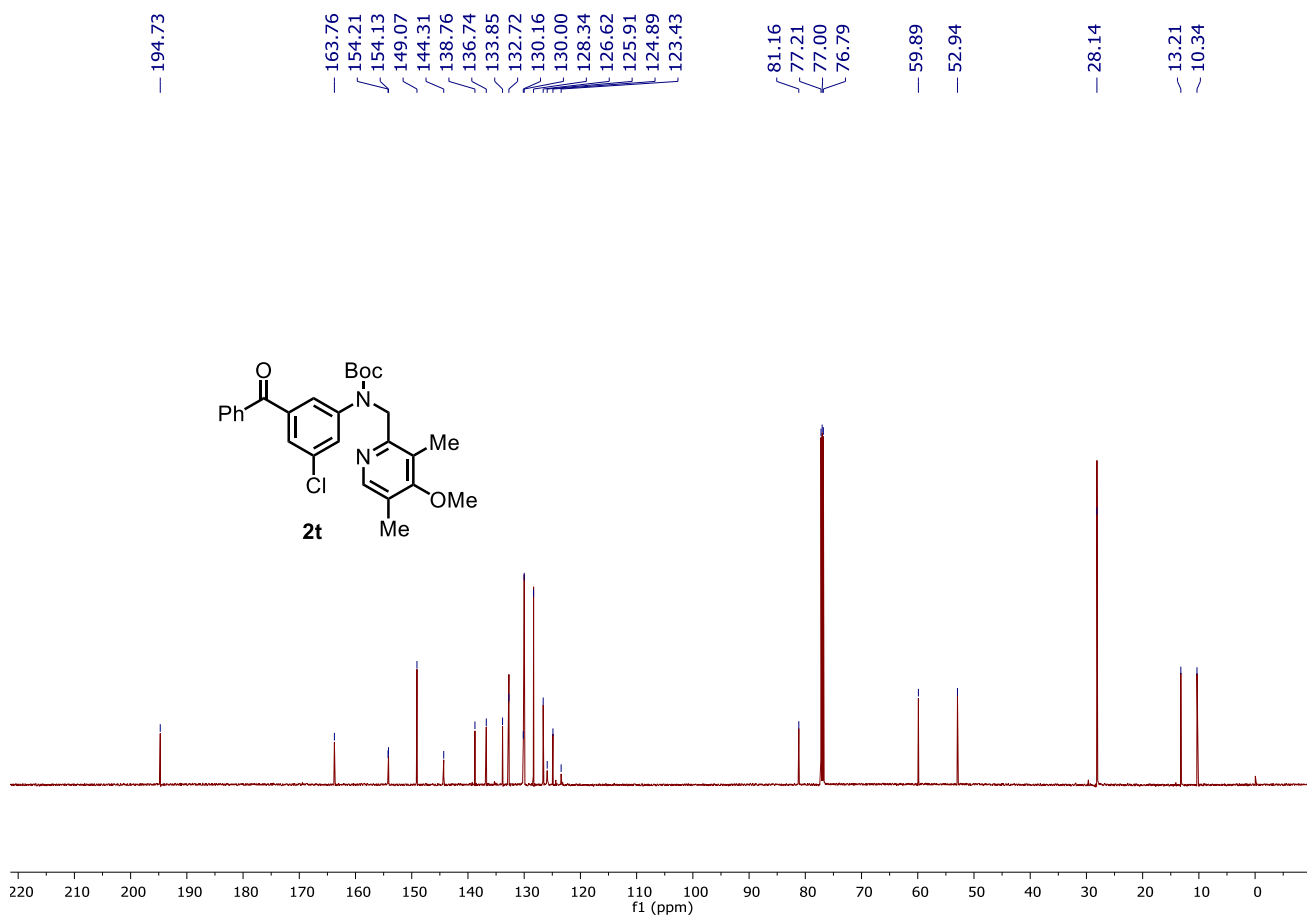

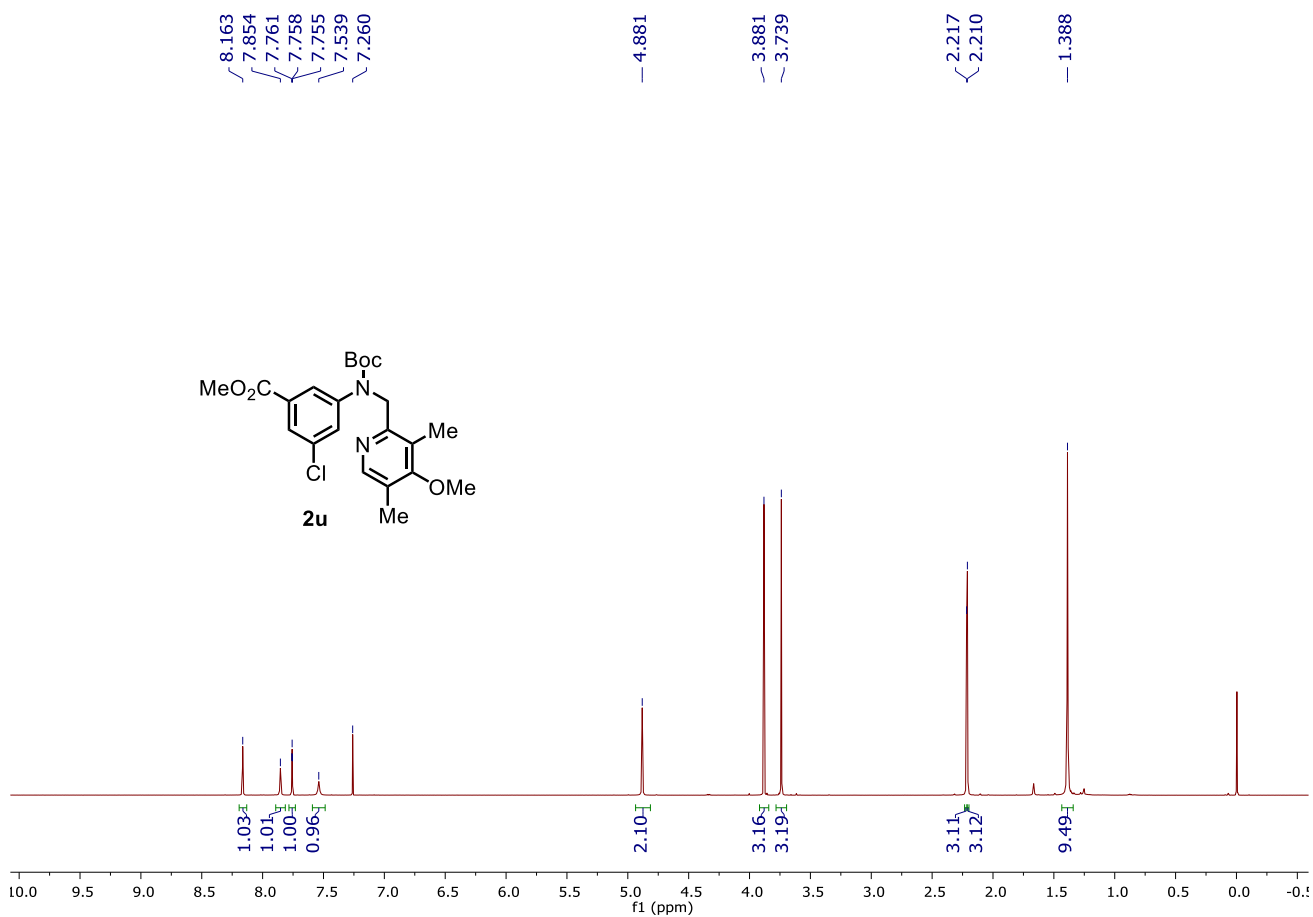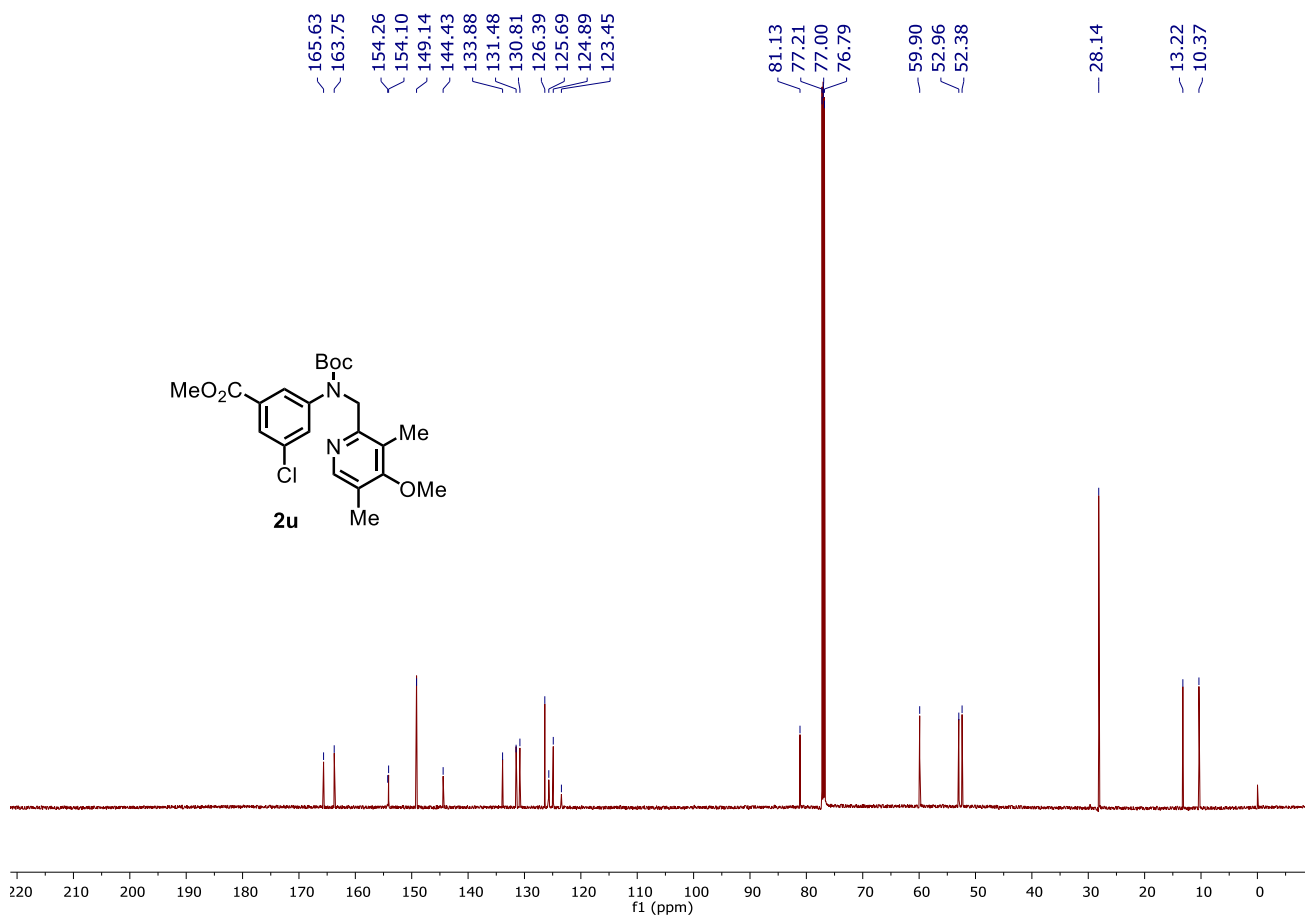

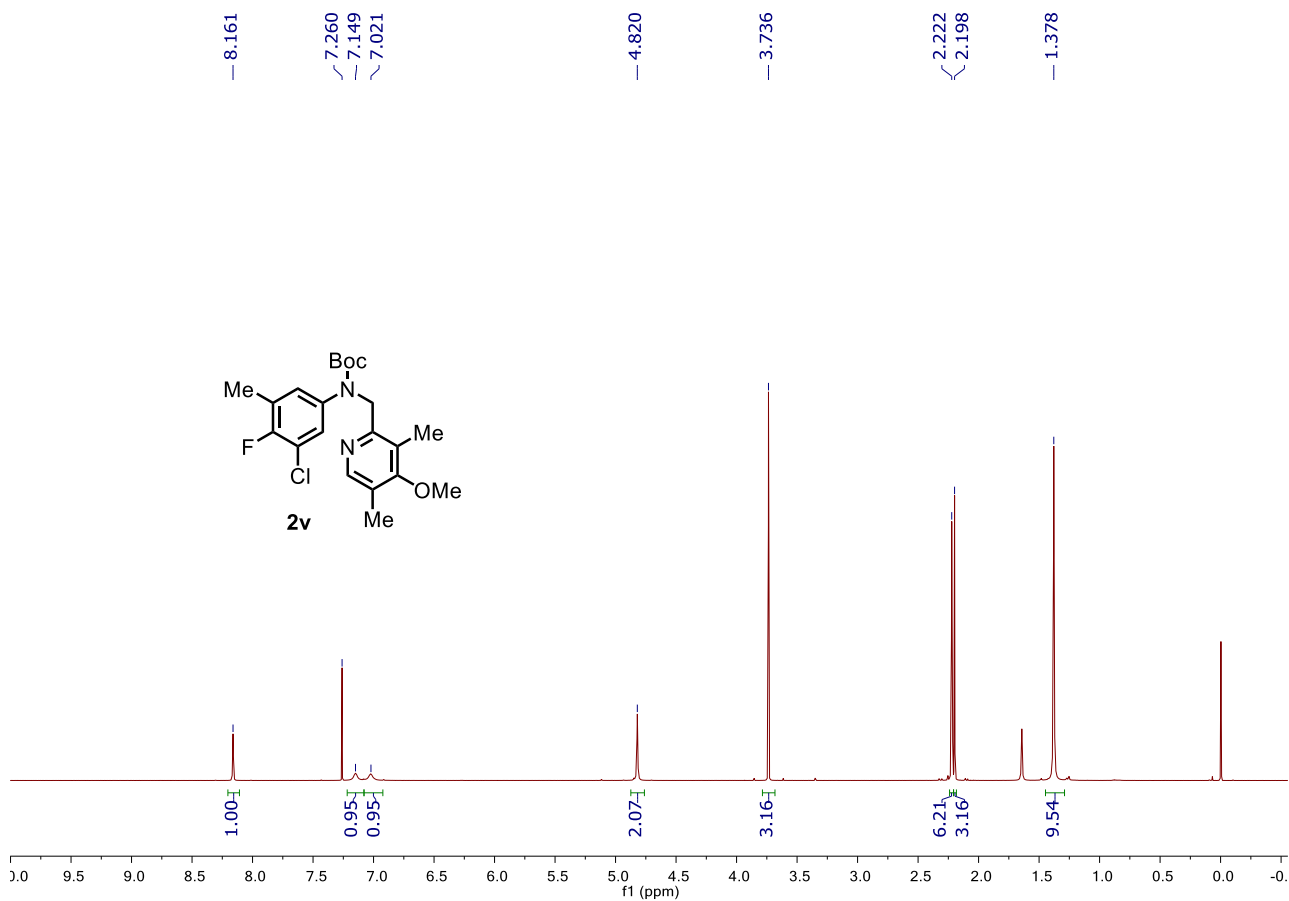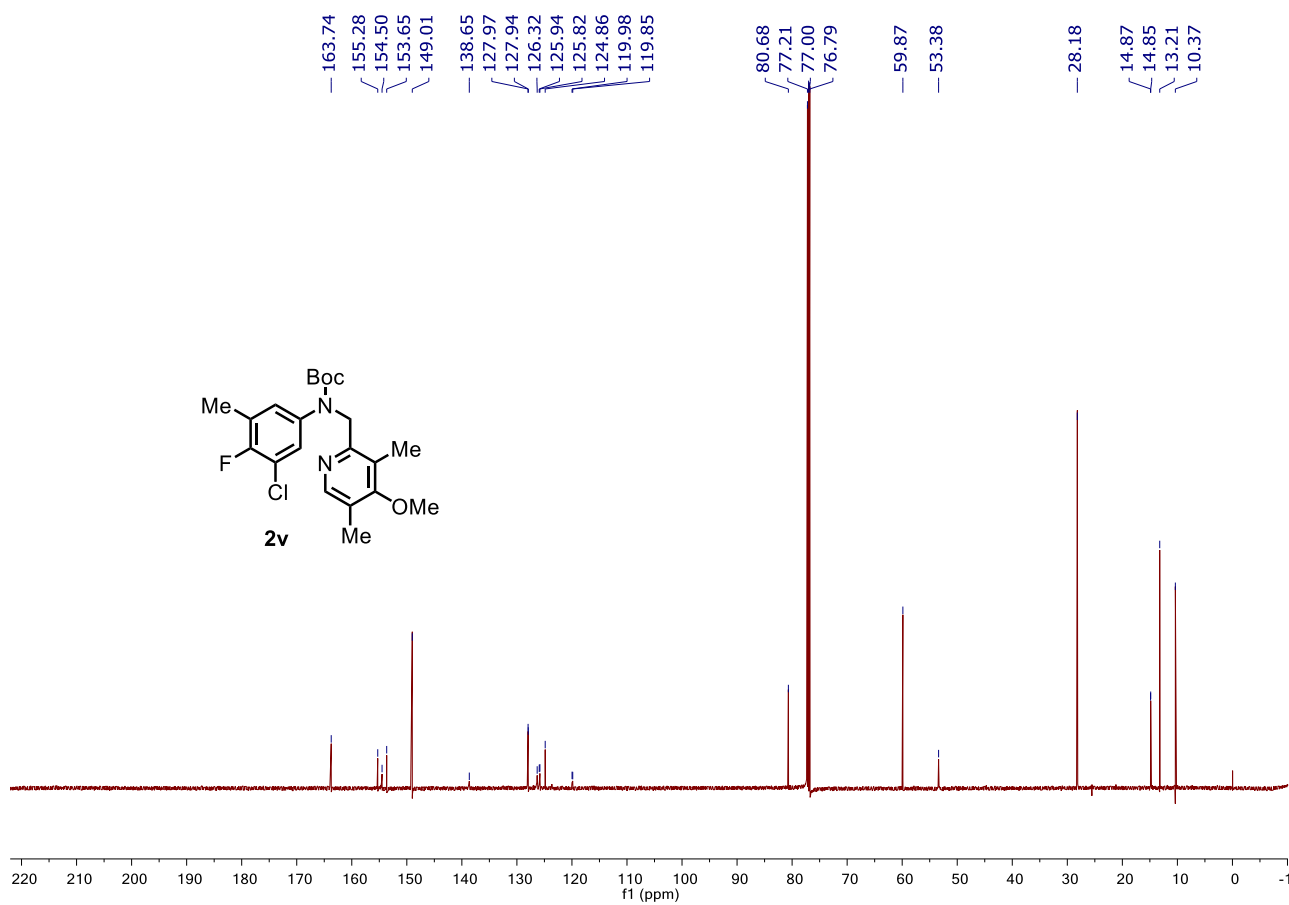



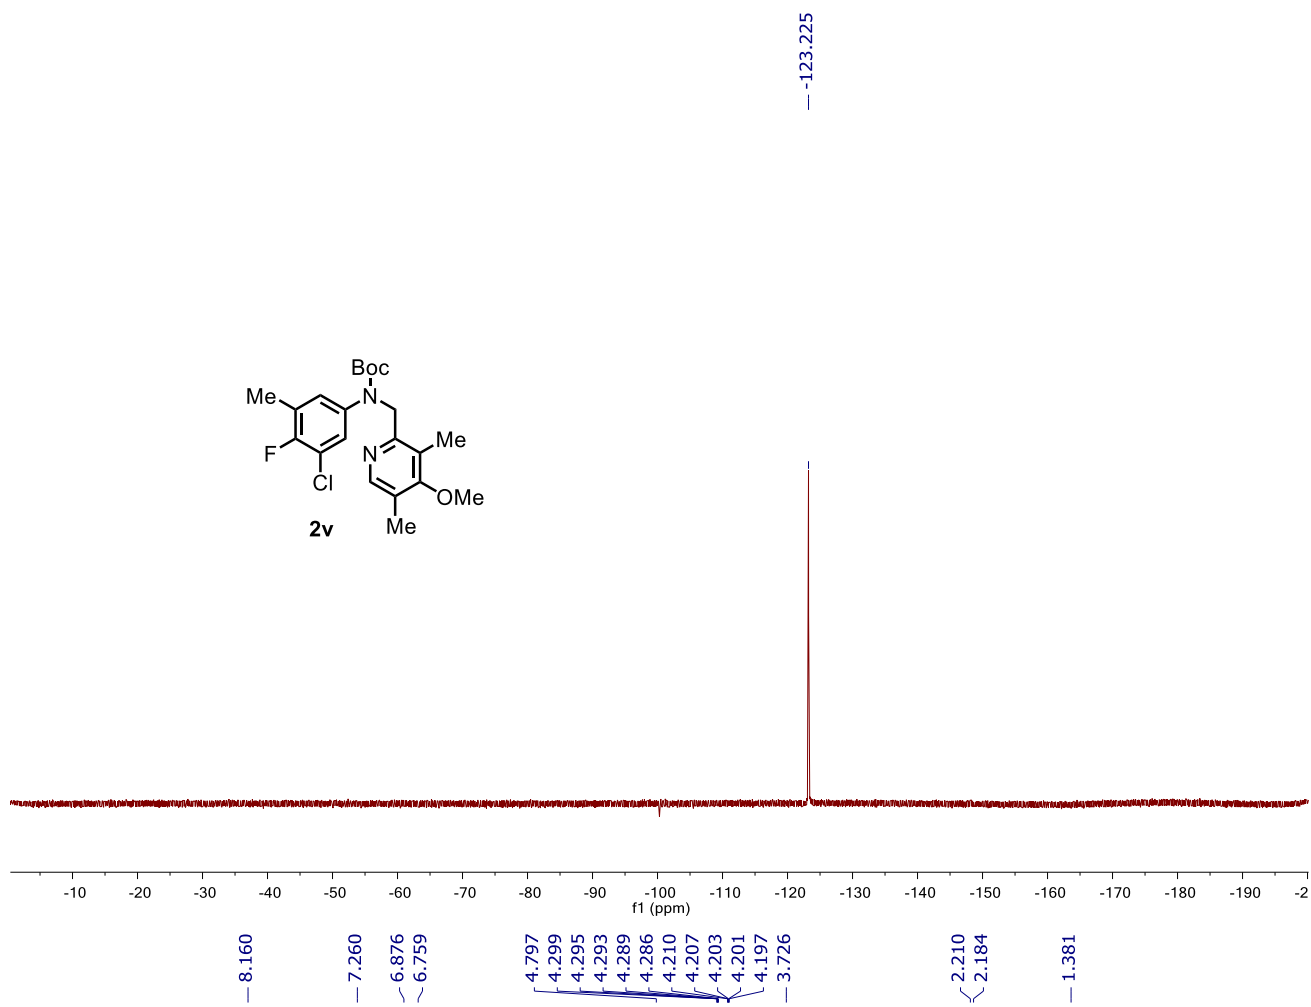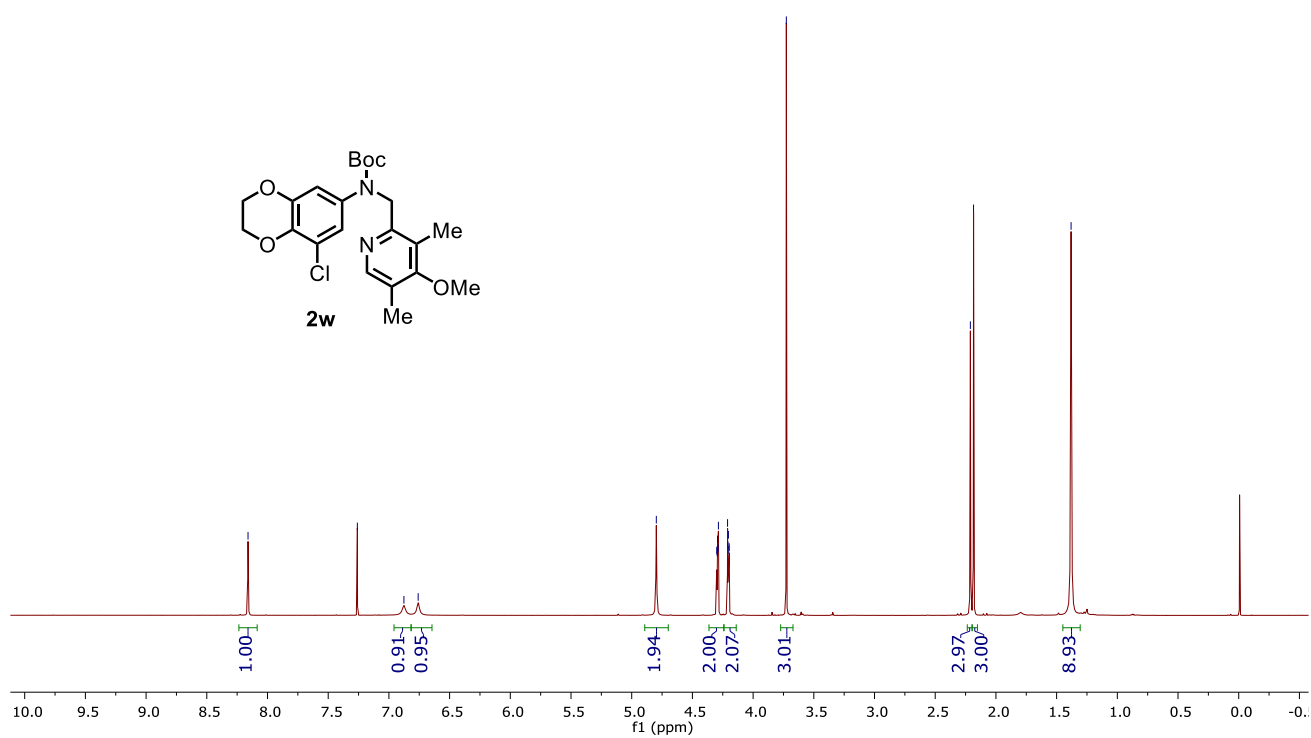

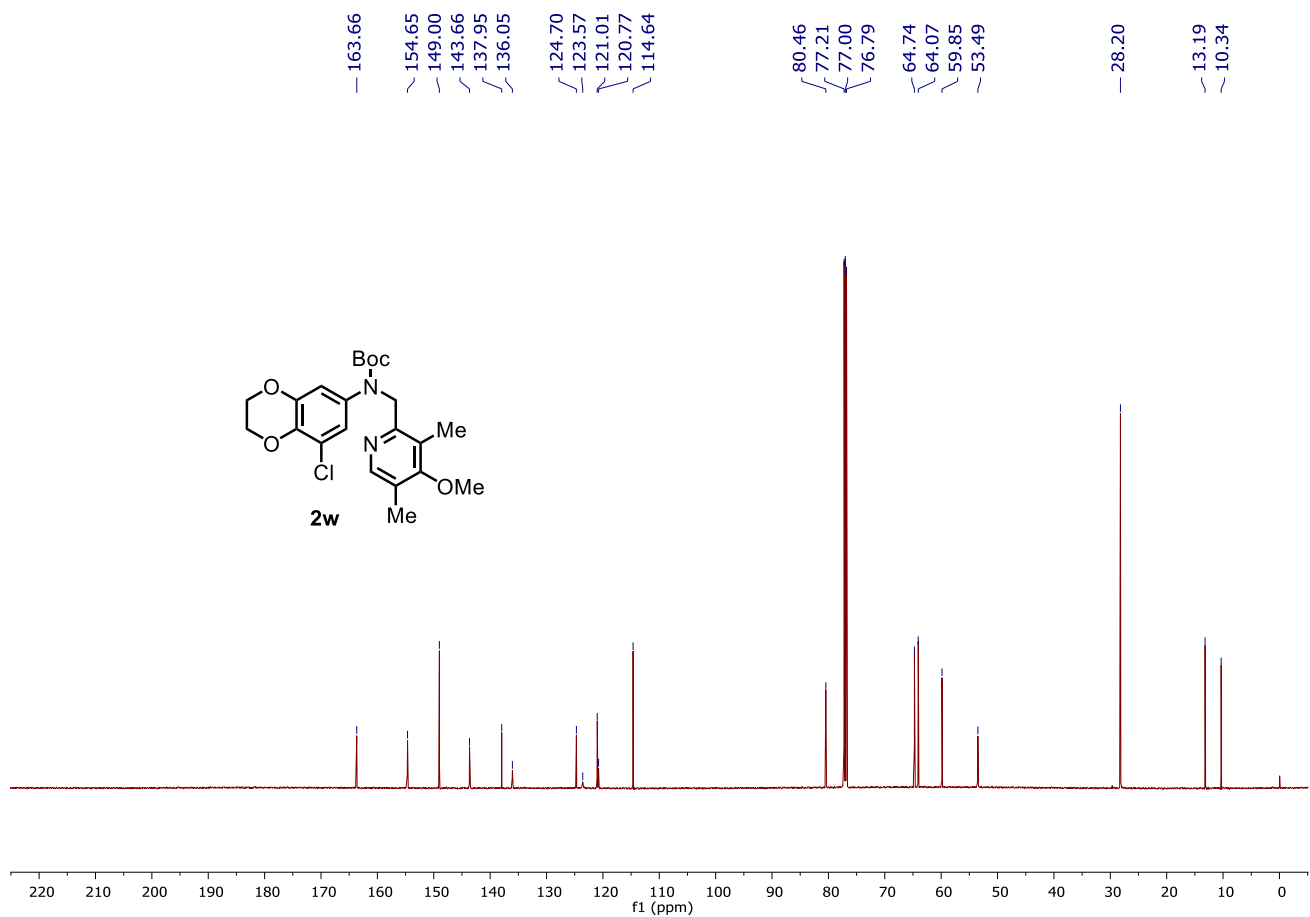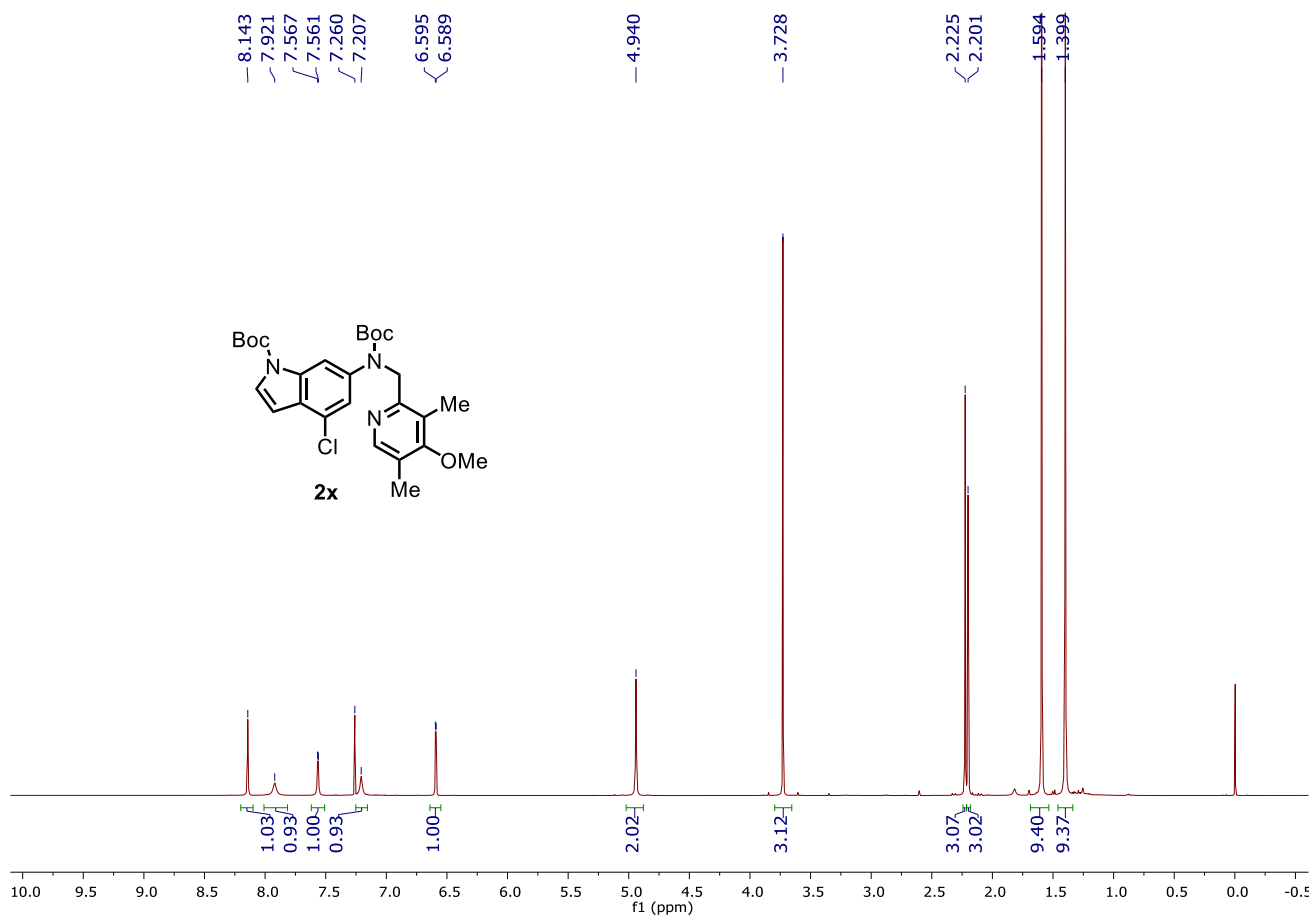

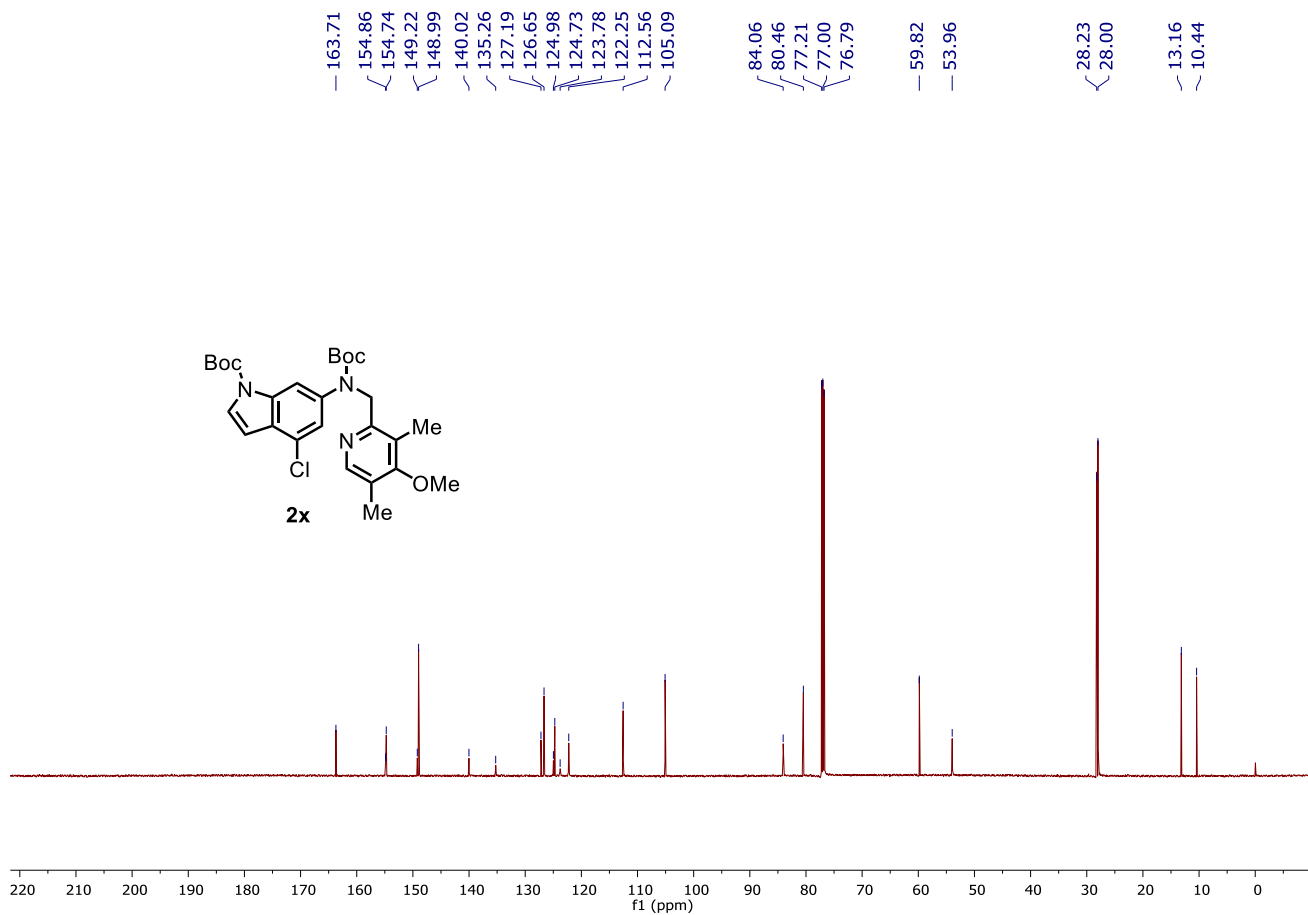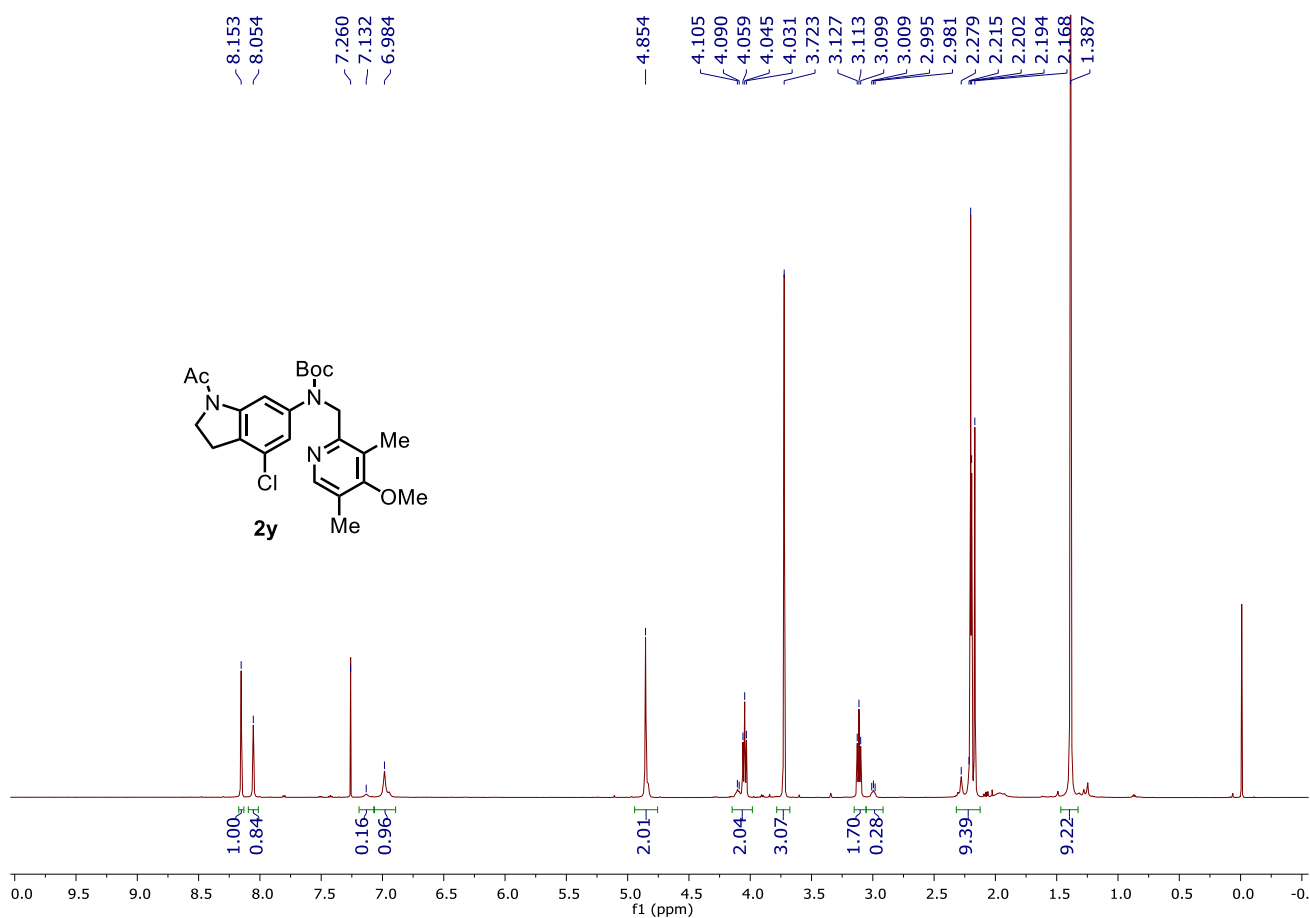

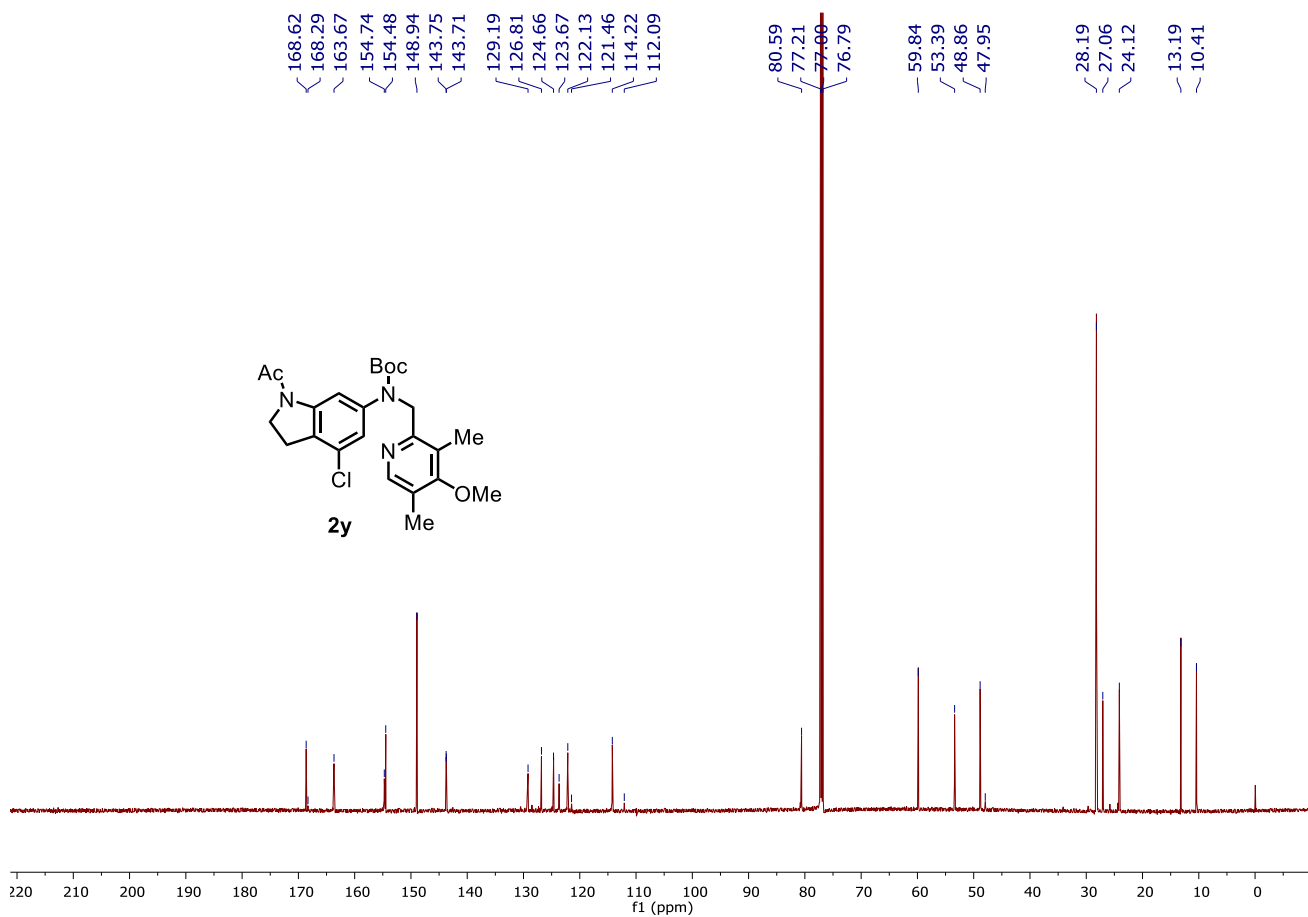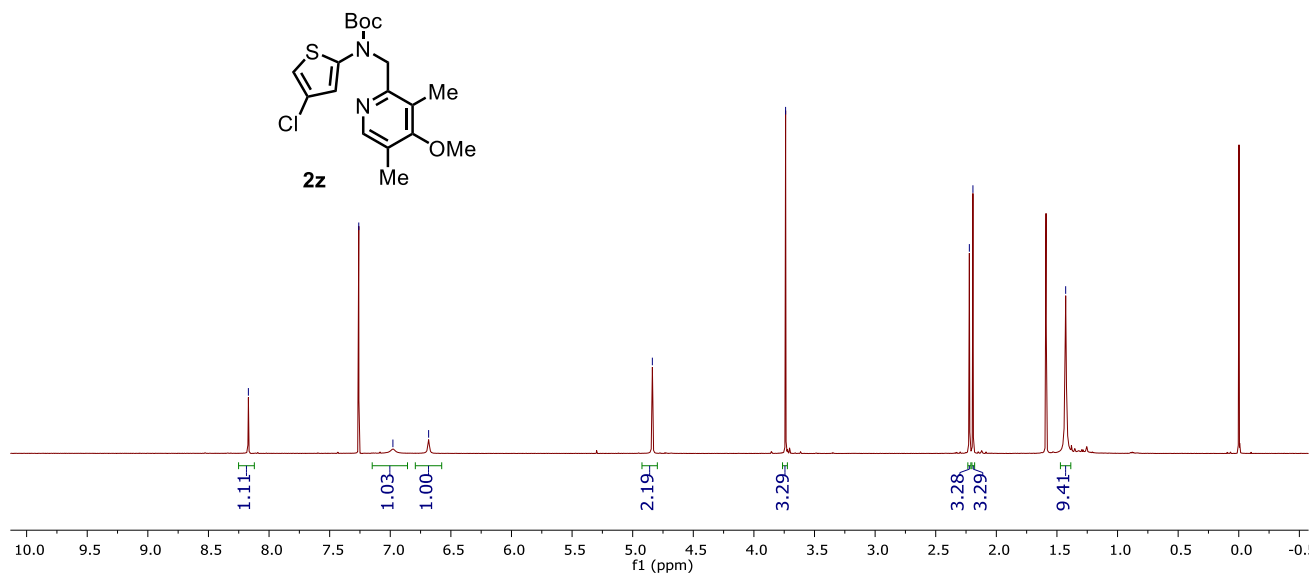

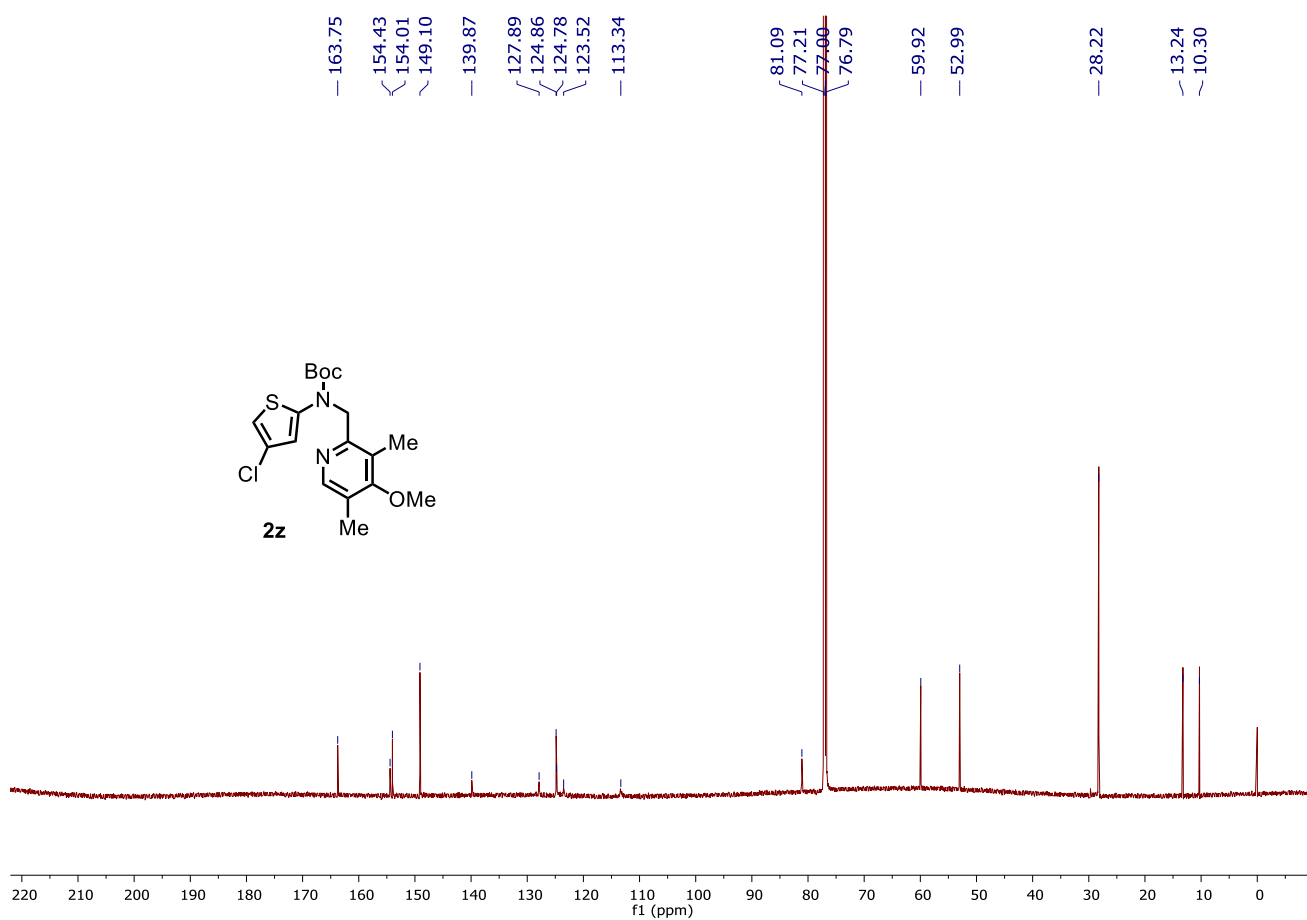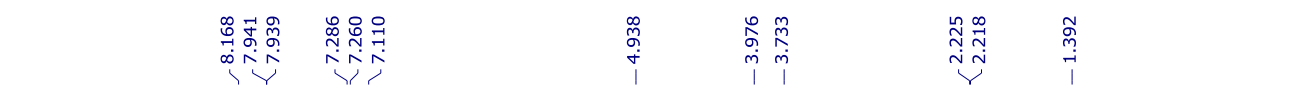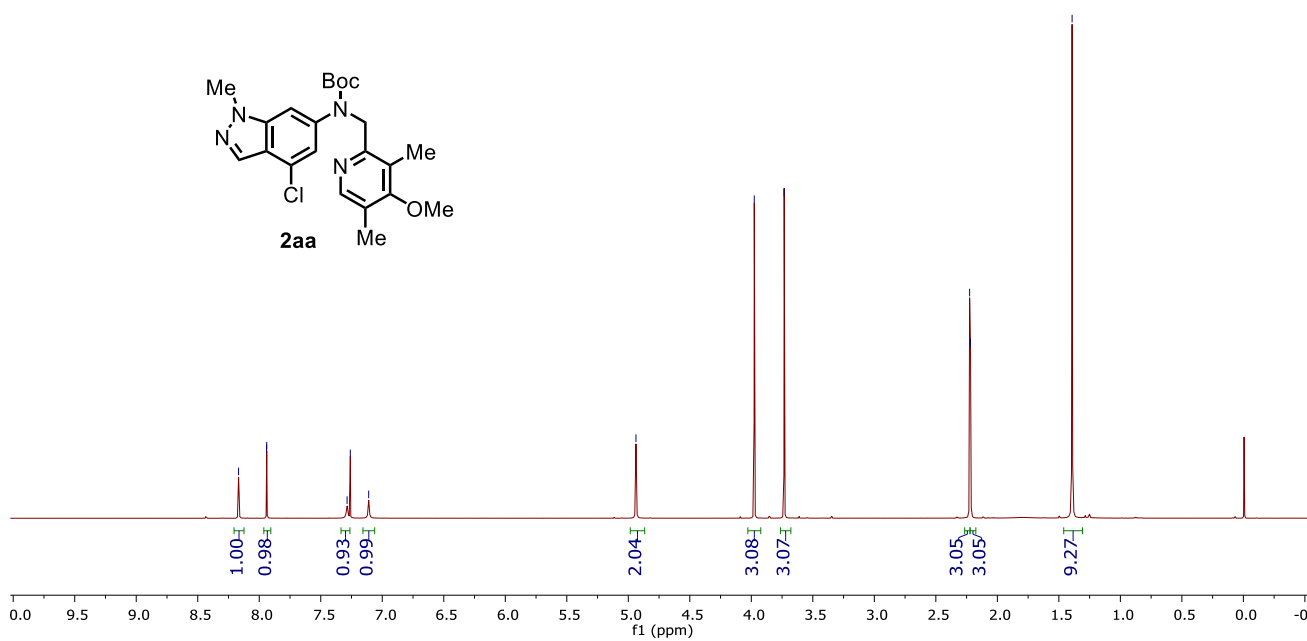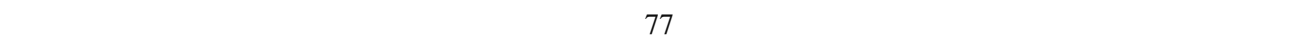

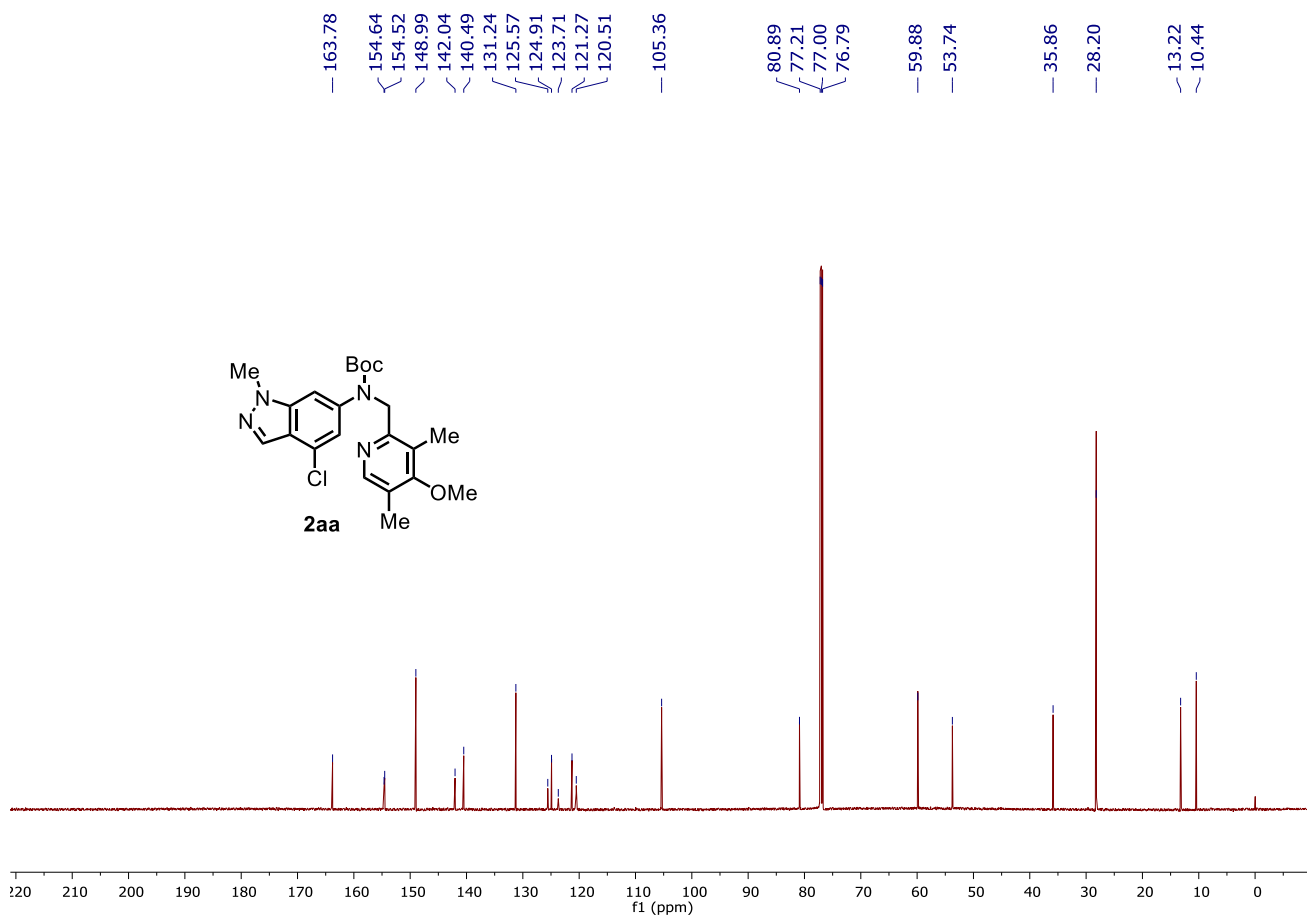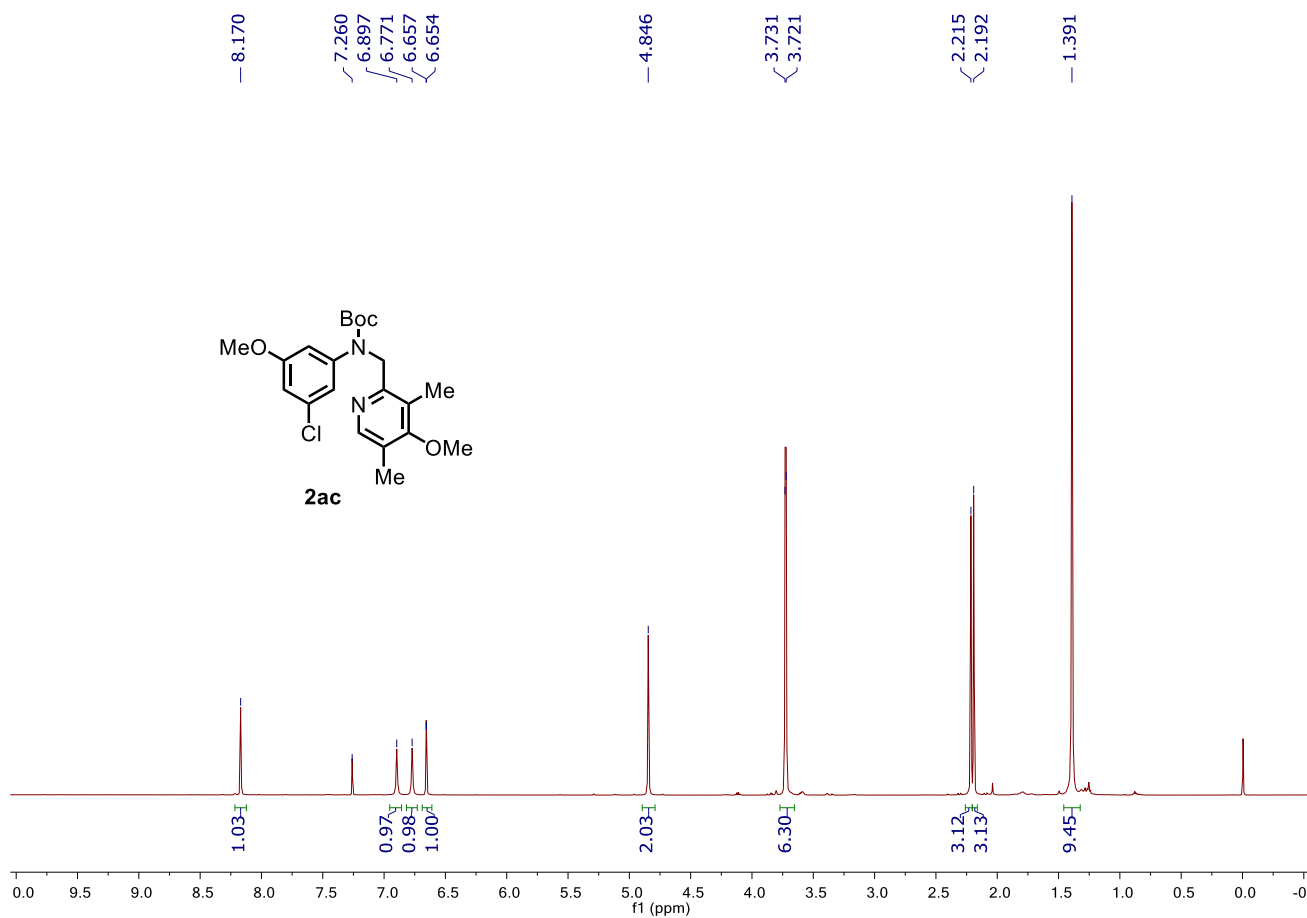

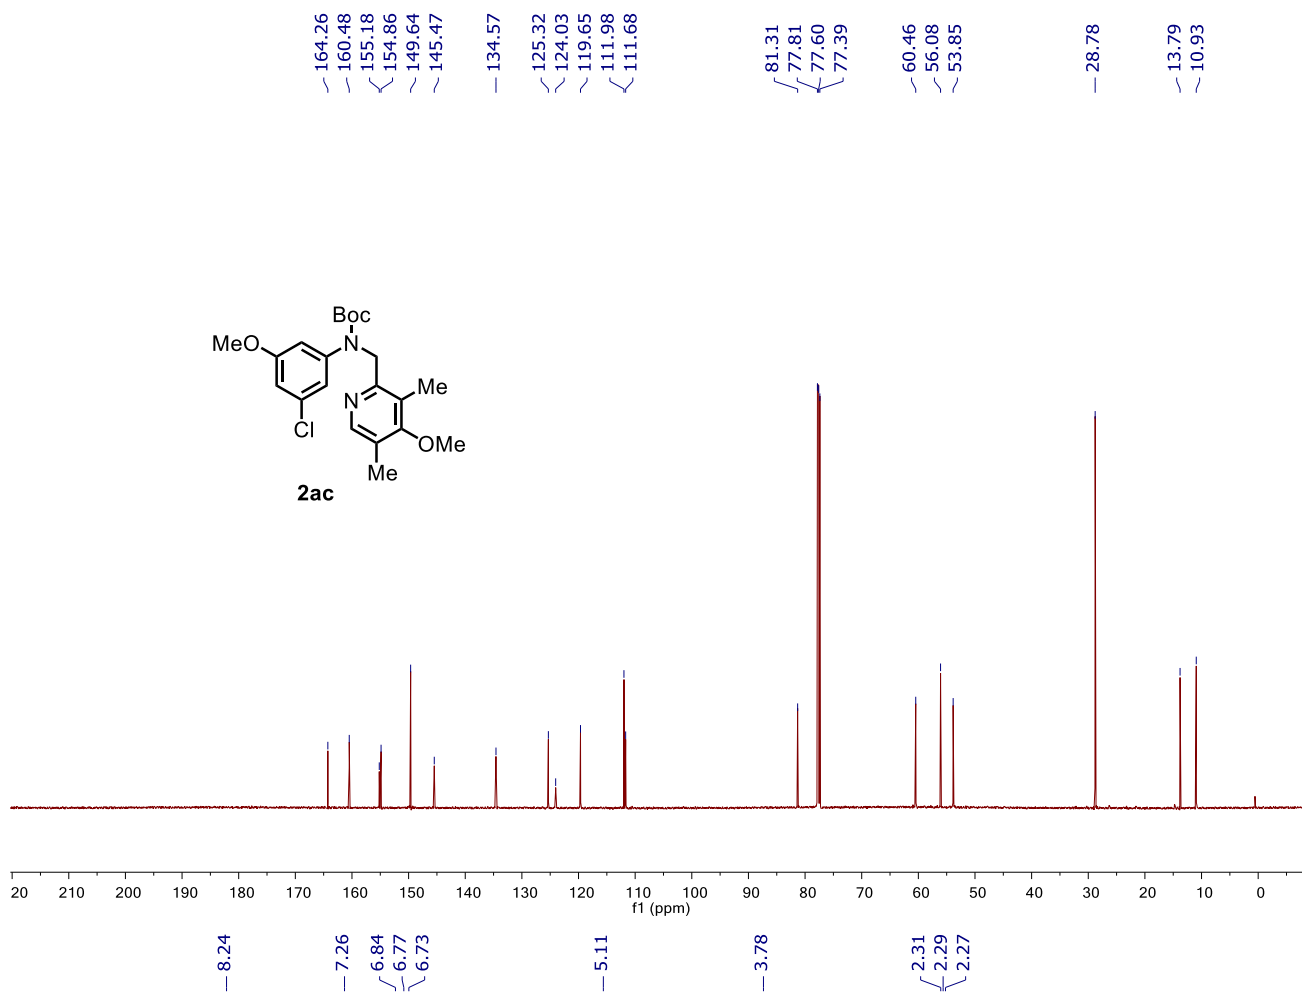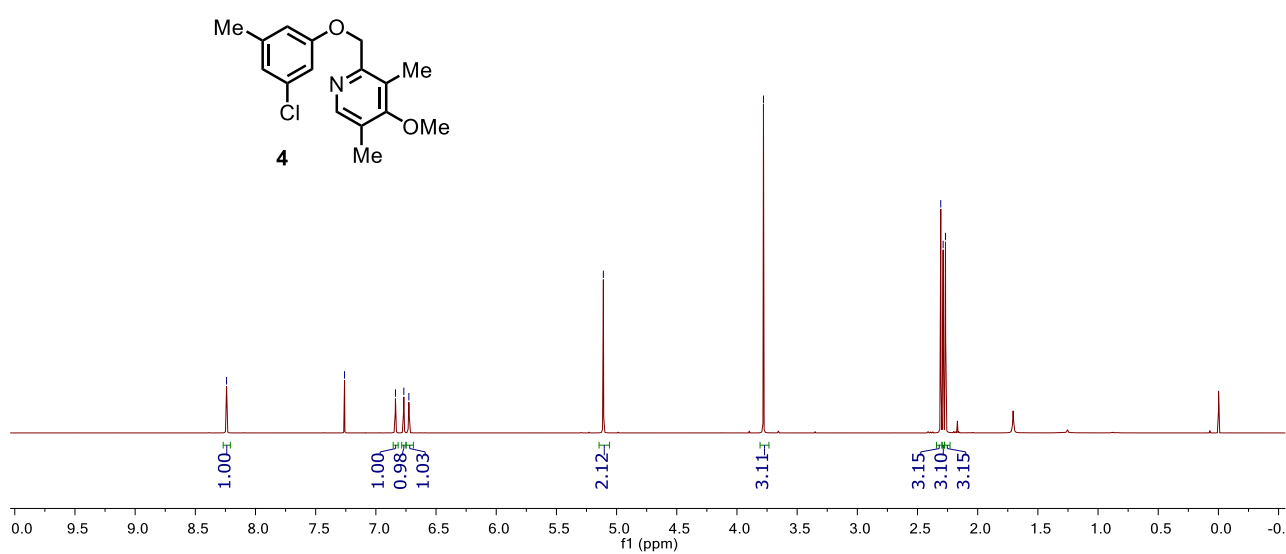

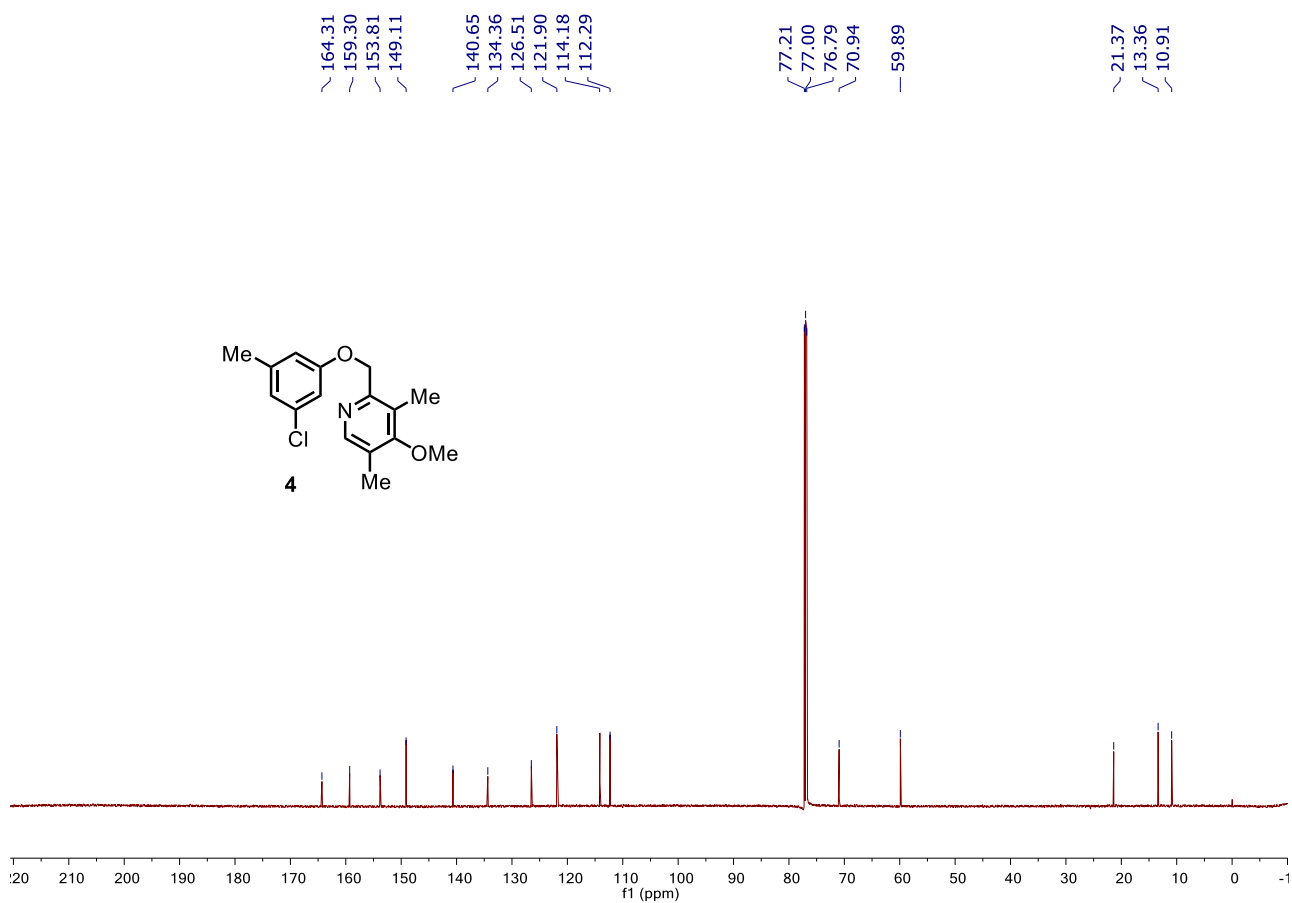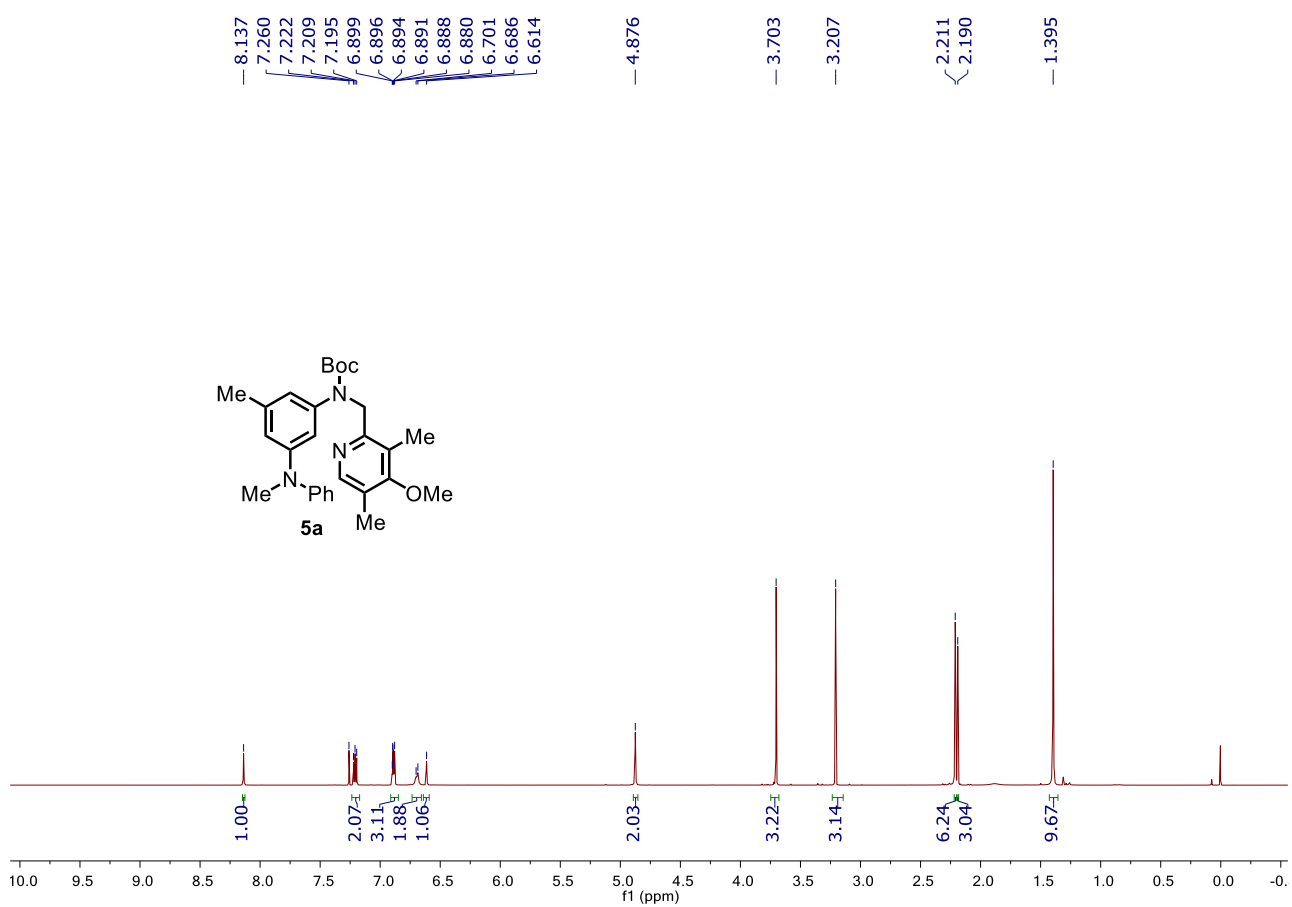



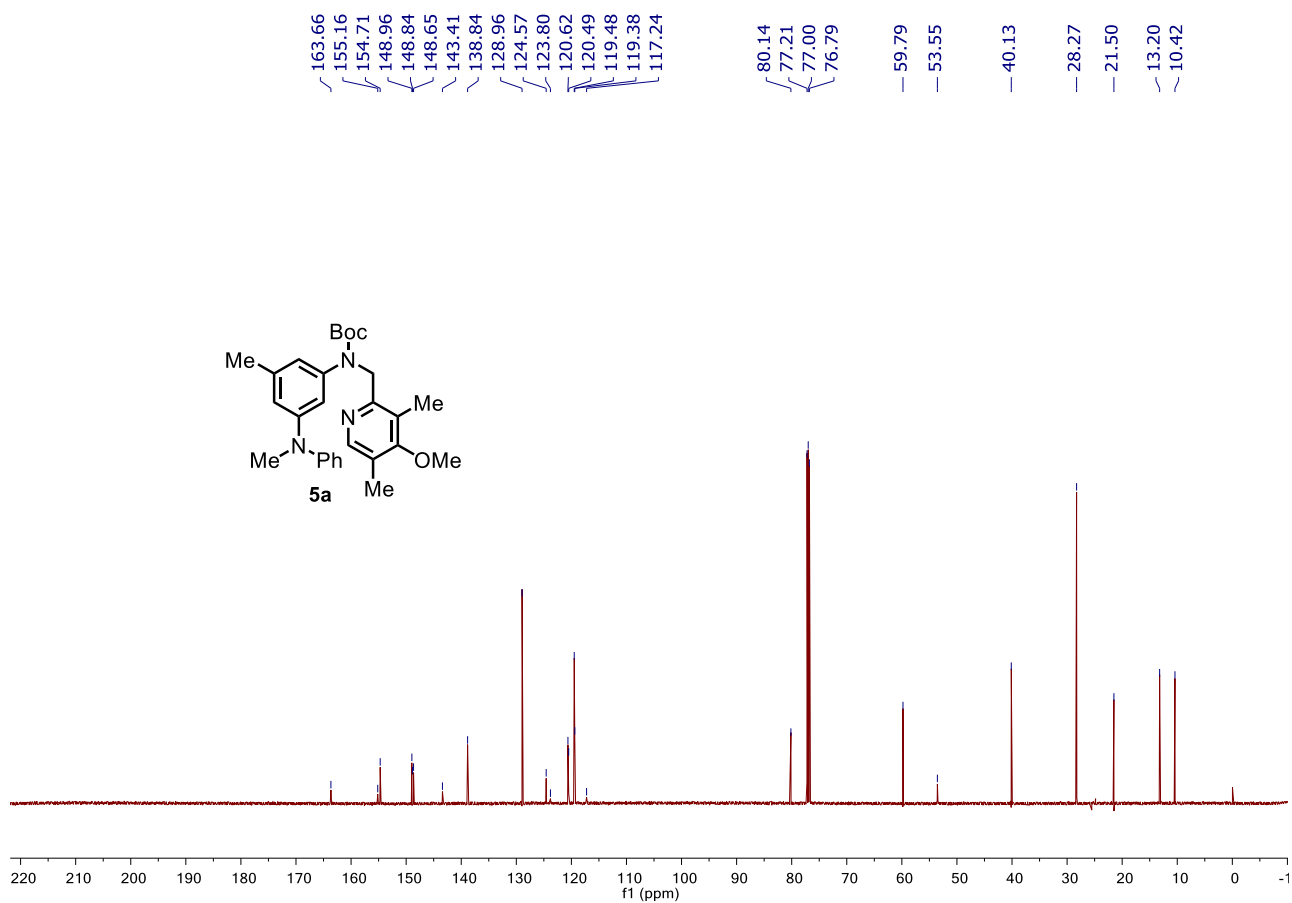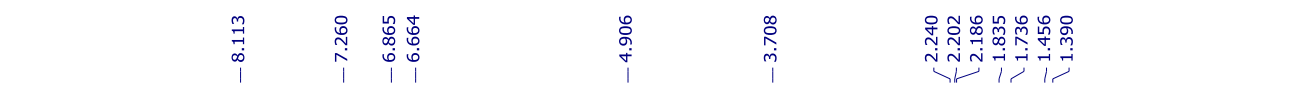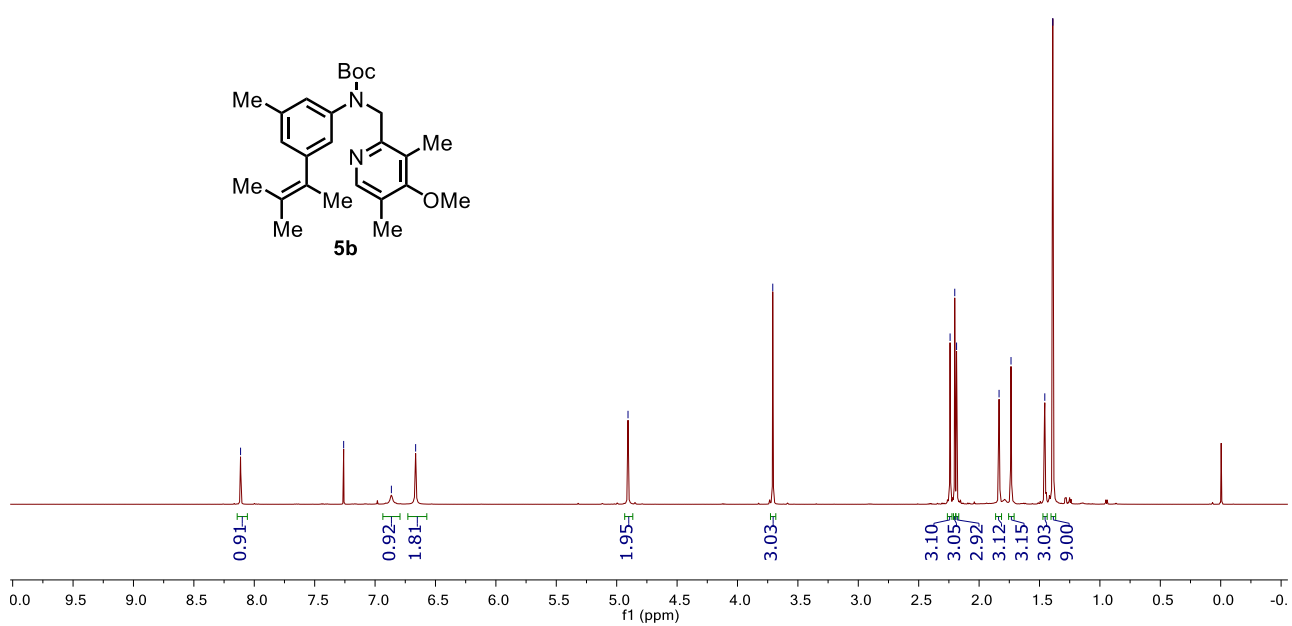

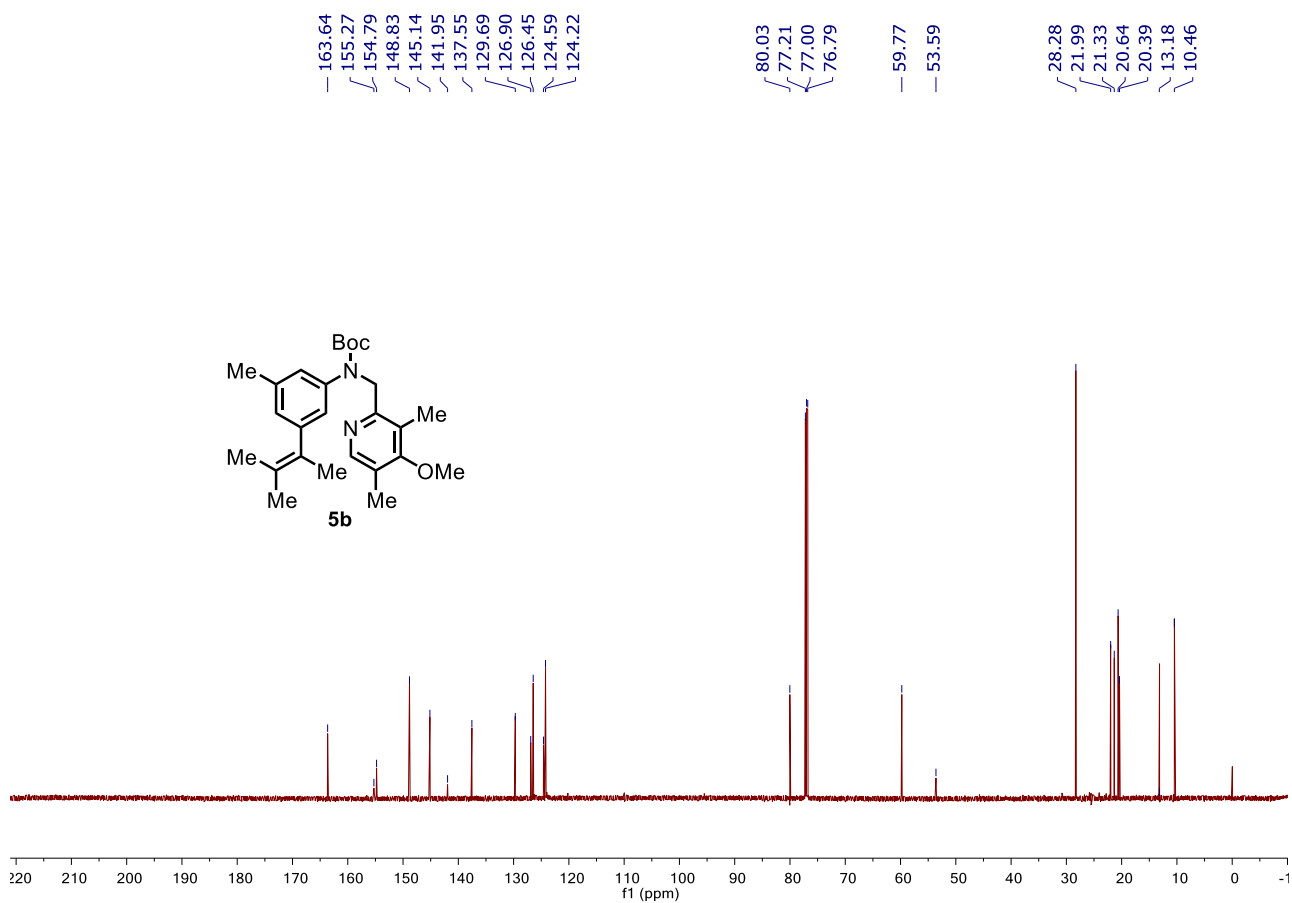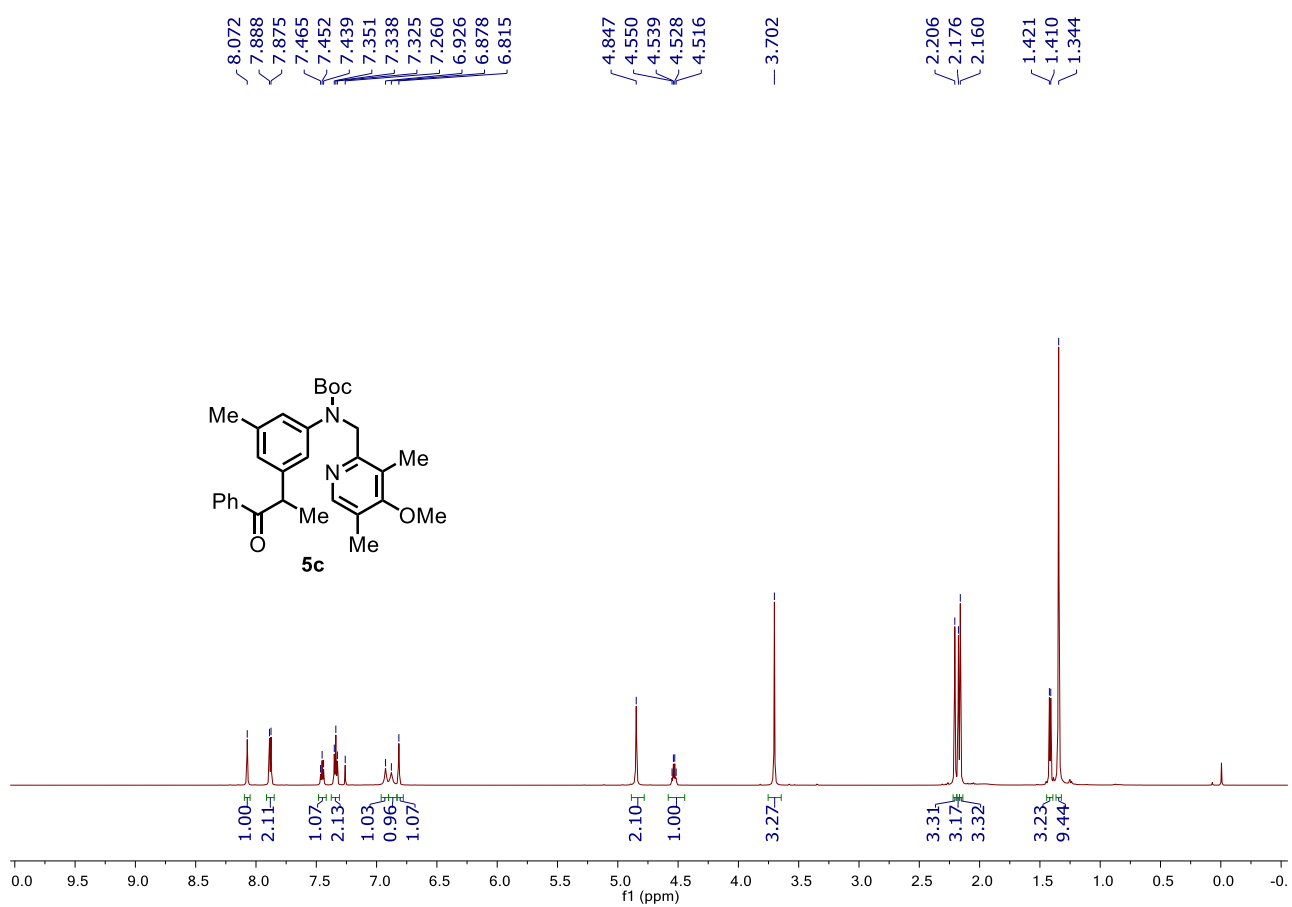

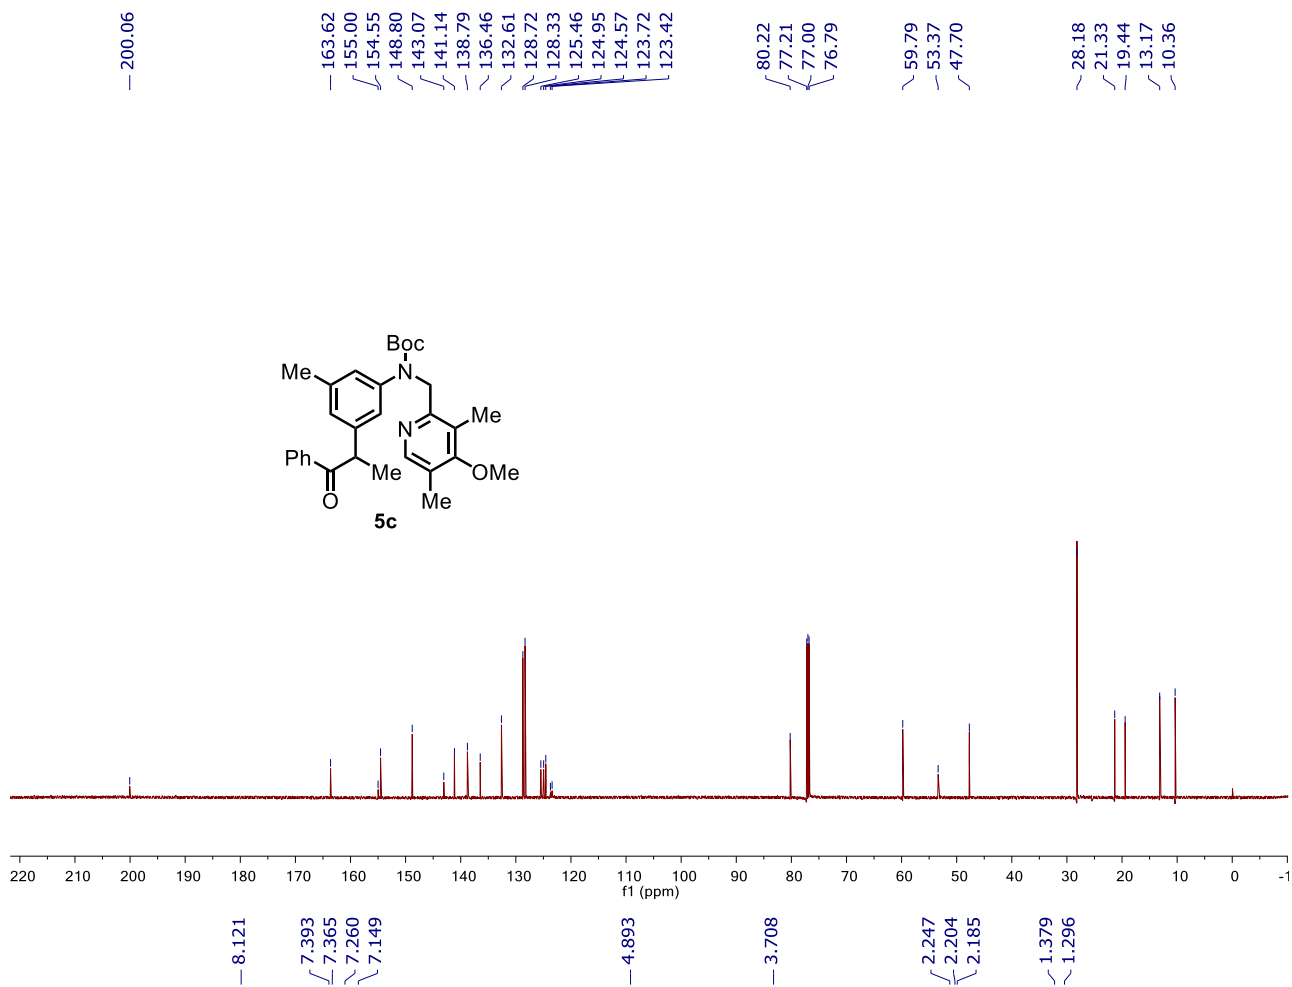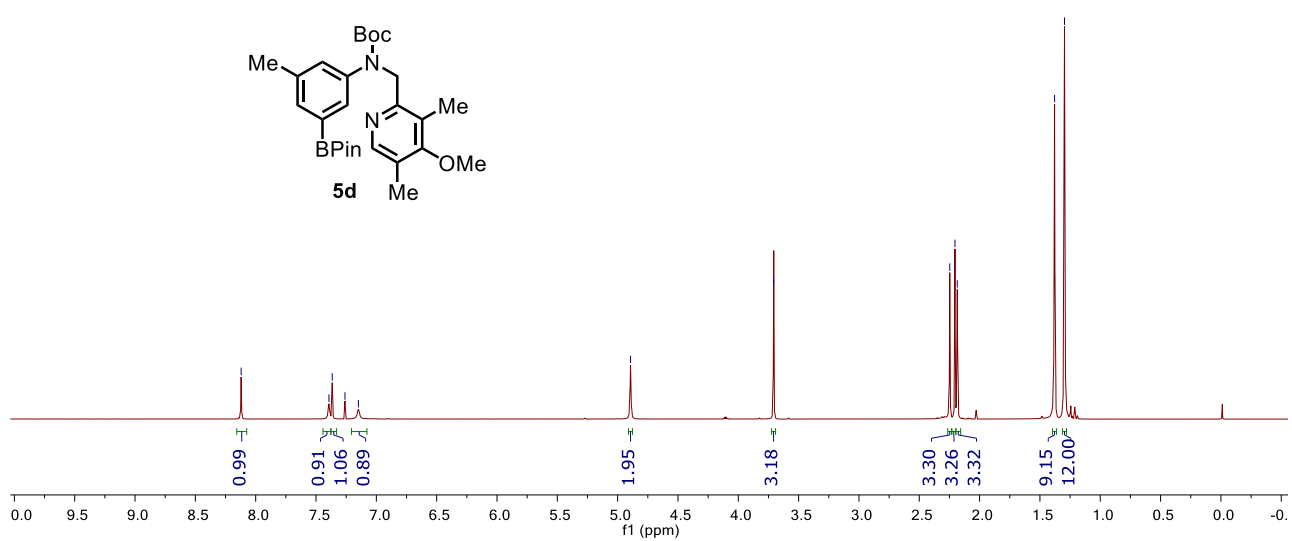

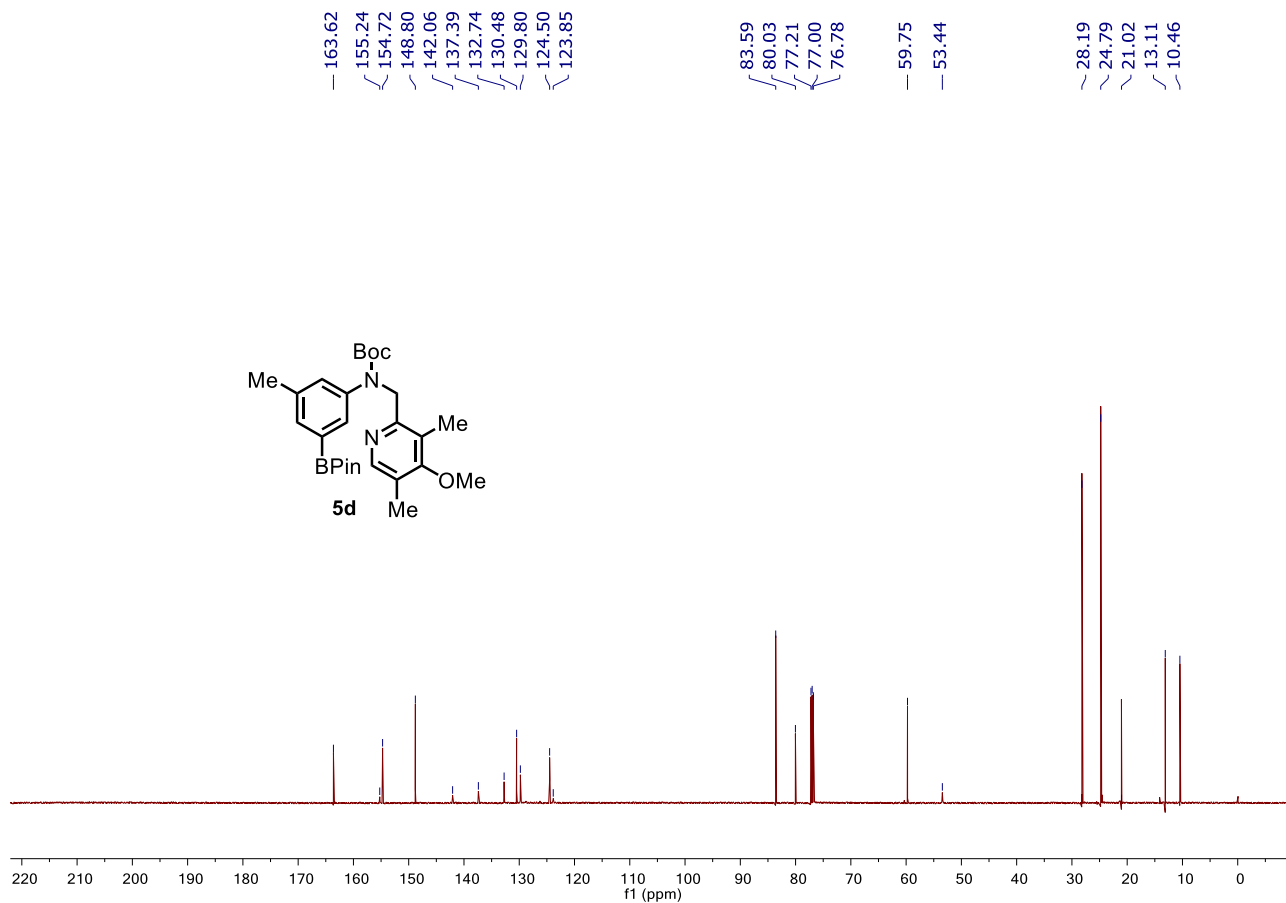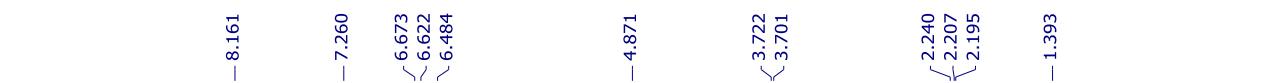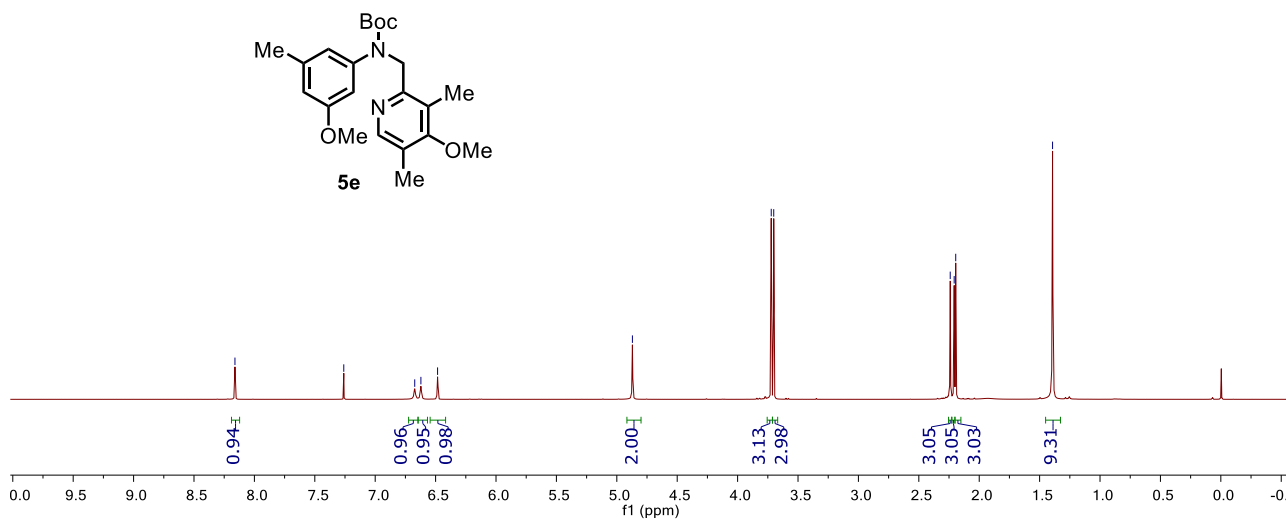

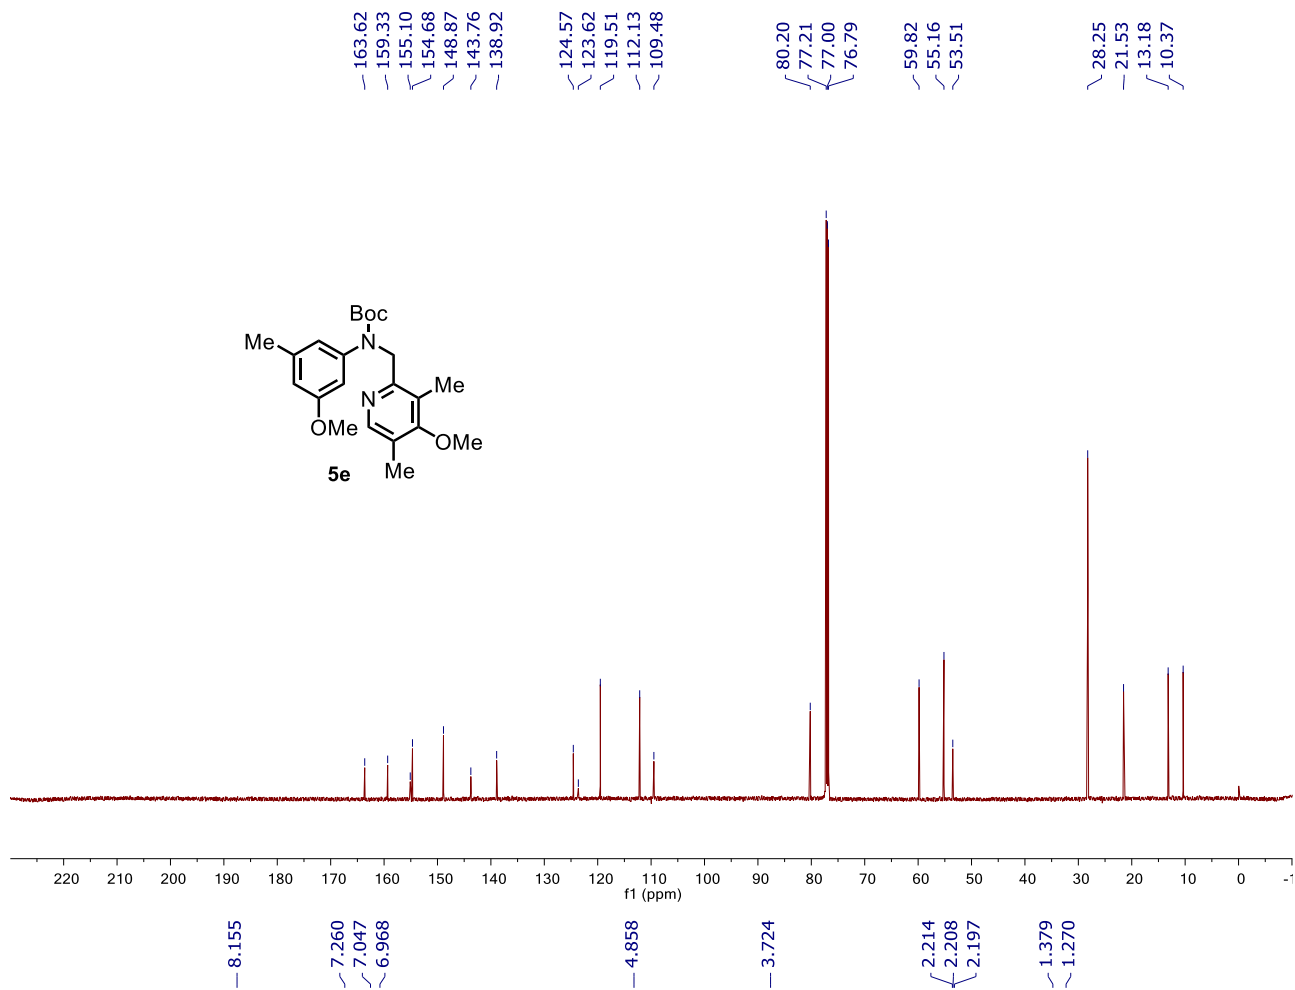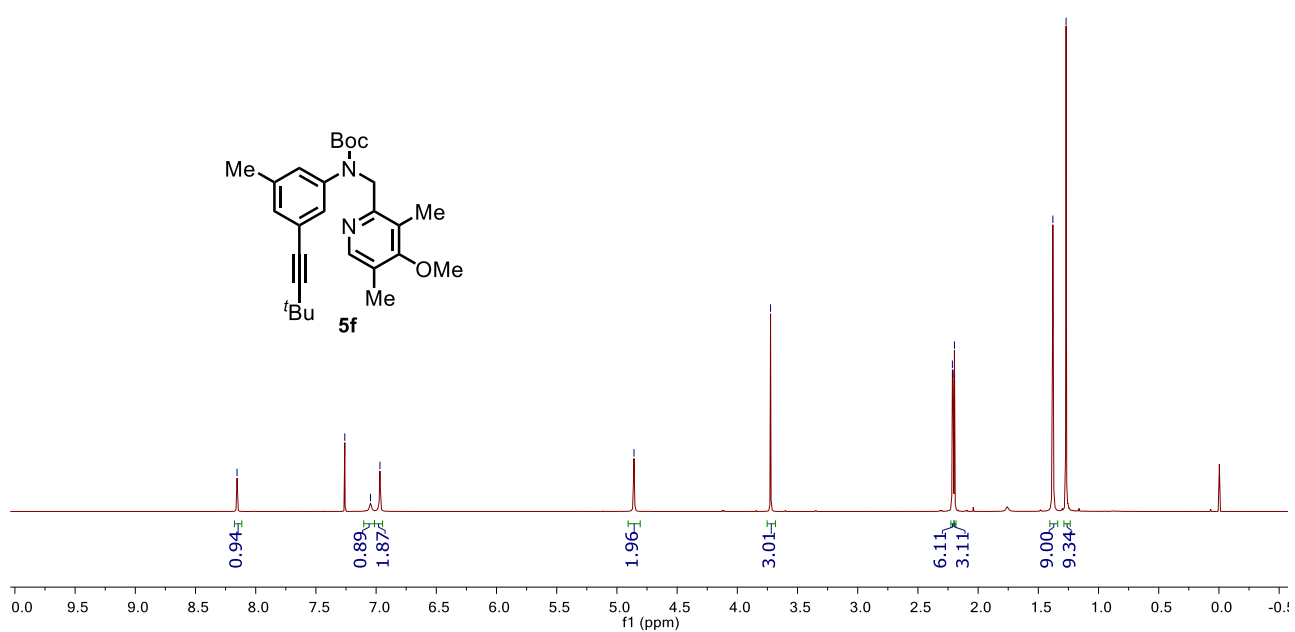

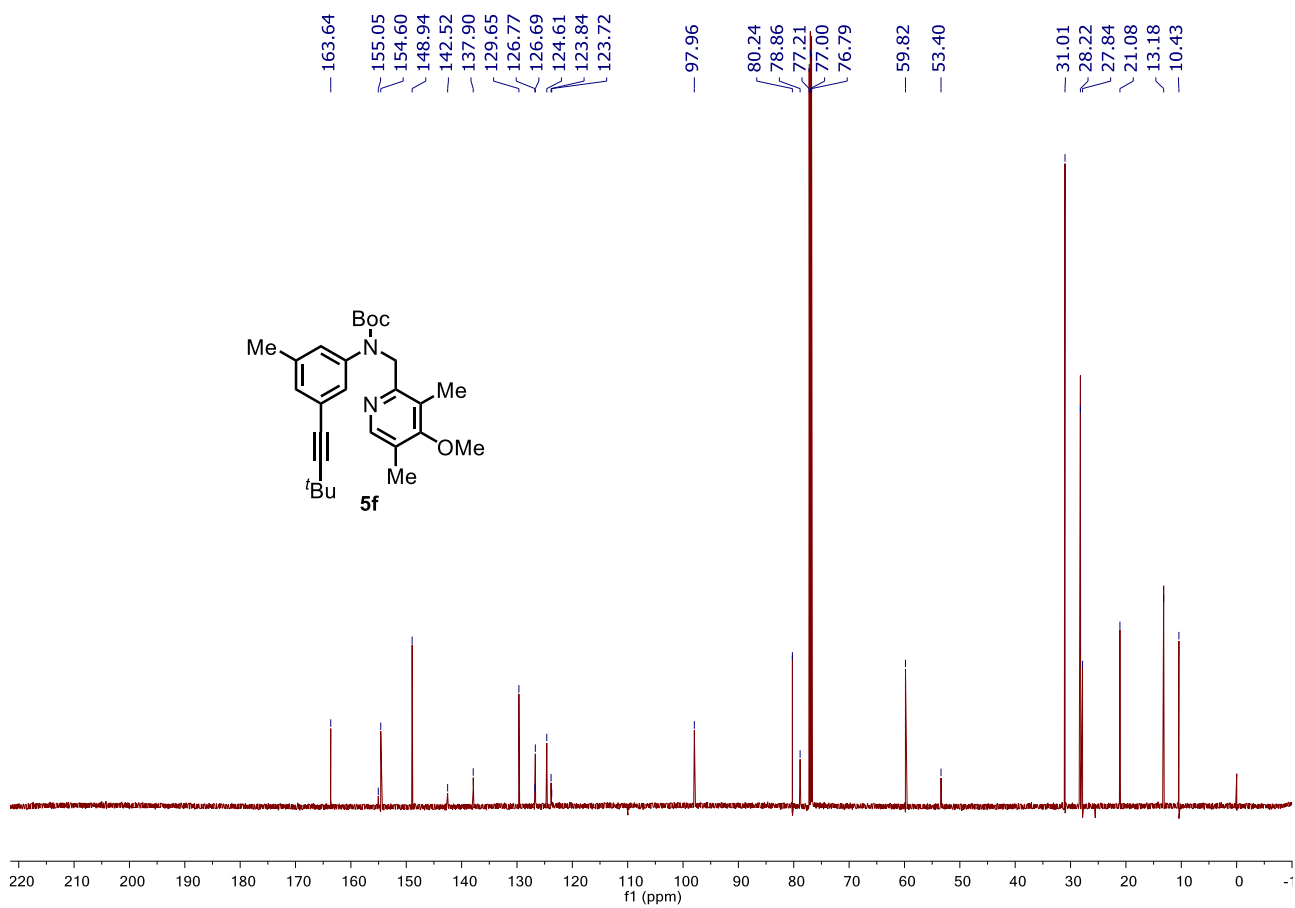

**References**

1. Shen, P.-X.; Wang, X.-C.; Wang, P.; Zhu, R.-Y.; Yu, J.-Q. *J. Am. Chem. Soc.* **2015**, *137*, 11574.
2. Wang, P.; Farmer, M. E.; Huo, X.; Jain, P.; Shen, P.-X.; Ishoey, M.; Bradner, J. E.; Wisniewski, S. R.; Eastgate, M. D.; Yu, J.-Q. *J. Am. Chem. Soc.* **2016**, *138*, 9269.
3. Cativiela, C.; Fernandez, J.; Melendez, E. *J. Heterocycl. Chem.* **1982**, *19*, 1093.
4. Due to the high number of fluorine atoms, the  $^{13}\text{C}$  peaks of heptafluoro-tolyl group were difficult to observe.
